# Supplementary material for: Likelihood-Based Gene Annotations for Gap Filling and Quality Assessment in Genome-Scale Metabolic Models
Source: PLoS Comput Biol. 2014 Oct 16;10(10):e1003882. doi: 10.1371/journal.pcbi.1003882 (PMC4199484; doi:10.1371/journal.pcbi.1003882)
Supplement: Dataset S3 — Analysis of genes unique to particular workflows. Likelihoods and phenotype predictions for gene-reaction links specific to parsimony-based or to likelihood-based gap filling. (XLSX) [file pcbi.1003882.s003.xlsx]

## Sheet: iterative_genes
Network-based genes						Likelihood-based genes
COMMON	fig|158879.1.peg.587	rxn09953	fig|158879.1.peg.587rxn09953	0.0566981		COMMON	fig|158879.1.peg.587	rxn09953	fig|158879.1.peg.587rxn09953	0.0566981
COMMON	fig|158879.1.peg.251	rxn10291	fig|158879.1.peg.251rxn10291	0.527666		COMMON	fig|158879.1.peg.251	rxn10291	fig|158879.1.peg.251rxn10291	0.527666
COMMON	fig|158879.1.peg.251	rxn10292	fig|158879.1.peg.251rxn10292	0.527666		COMMON	fig|158879.1.peg.251	rxn10292	fig|158879.1.peg.251rxn10292	0.527666
COMMON	fig|158879.1.peg.251	rxn10293	fig|158879.1.peg.251rxn10293	0.527666		COMMON	fig|158879.1.peg.251	rxn10293	fig|158879.1.peg.251rxn10293	0.527666
COMMON	fig|158879.1.peg.1623	rxn01973	fig|158879.1.peg.1623rxn01973	0.115911		COMMON	fig|158879.1.peg.1623	rxn01973	fig|158879.1.peg.1623rxn01973	0.115911
COMMON	fig|158879.1.peg.255	rxn10197	fig|158879.1.peg.255rxn10197	0.028386		COMMON	fig|158879.1.peg.255	rxn10197	fig|158879.1.peg.255rxn10197	0.028386
COMMON	fig|158879.1.peg.1270	rxn01644	fig|158879.1.peg.1270rxn01644	0.0282913		COMMON	fig|158879.1.peg.1270	rxn01644	fig|158879.1.peg.1270rxn01644	0.0282913
COMMON	fig|158879.1.peg.1270	rxn02988	fig|158879.1.peg.1270rxn02988	0.02636		COMMON	fig|158879.1.peg.1270	rxn02988	fig|158879.1.peg.1270rxn02988	0.02636
COMMON	fig|158879.1.peg.1271	rxn02929	fig|158879.1.peg.1271rxn02929	0.274764		COMMON	fig|158879.1.peg.1271	rxn02929	fig|158879.1.peg.1271rxn02929	0.274764
COMMON	fig|158879.1.peg.371	rxn03150	fig|158879.1.peg.371rxn03150	0.474335		COMMON	fig|158879.1.peg.371	rxn03150	fig|158879.1.peg.371rxn03150	0.474335
COMMON	fig|158879.1.peg.1528	rxn11946	fig|158879.1.peg.1528rxn11946	0.0563347		COMMON	fig|158879.1.peg.1528	rxn11946	fig|158879.1.peg.1528rxn11946	0.0563347
COMMON	fig|158879.1.peg.1528	rxn03395	fig|158879.1.peg.1528rxn03395	0.0563347		COMMON	fig|158879.1.peg.1528	rxn03395	fig|158879.1.peg.1528rxn03395	0.0563347
COMMON	fig|158879.1.peg.2484	rxn01204	fig|158879.1.peg.2484rxn01204	0.765755		COMMON	fig|158879.1.peg.2484	rxn01204	fig|158879.1.peg.2484rxn01204	0.765755
COMMON	fig|158879.1.peg.2489	rxn00986	fig|158879.1.peg.2489rxn00986	0.912336		COMMON	fig|158879.1.peg.2489	rxn00986	fig|158879.1.peg.2489rxn00986	0.912336
COMMON	fig|158879.1.peg.2418	rxn01501	fig|158879.1.peg.2418rxn01501	0.942265		COMMON	fig|158879.1.peg.2418	rxn01501	fig|158879.1.peg.2418rxn01501	0.942265
COMMON	fig|158879.1.peg.1767	rxn00748	fig|158879.1.peg.1767rxn00748	0.658333		COMMON	fig|158879.1.peg.1767	rxn00748	fig|158879.1.peg.1767rxn00748	0.658333
COMMON	fig|158879.1.peg.2274	rxn02056	fig|158879.1.peg.2274rxn02056	0.43393		COMMON	fig|158879.1.peg.2274	rxn02056	fig|158879.1.peg.2274rxn02056	0.43393
COMMON	fig|158879.1.peg.1904	rxn01630	fig|158879.1.peg.1904rxn01630	0.0476151		COMMON	fig|158879.1.peg.1904	rxn01630	fig|158879.1.peg.1904rxn01630	0.0476151
COMMON	fig|158879.1.peg.2352	rxn03886	fig|158879.1.peg.2352rxn03886	0.0103855		COMMON	fig|158879.1.peg.2352	rxn03886	fig|158879.1.peg.2352rxn03886	0.0103855
COMMON	fig|158879.1.peg.542	rxn03643	fig|158879.1.peg.542rxn03643	0.613662		COMMON	fig|158879.1.peg.542	rxn03643	fig|158879.1.peg.542rxn03643	0.613662
COMMON	fig|158879.1.peg.1968	rxn05381	fig|158879.1.peg.1968rxn05381	0.780085		COMMON	fig|158879.1.peg.1968	rxn05381	fig|158879.1.peg.1968rxn05381	0.780085
COMMON	fig|158879.1.peg.1968	rxn05390	fig|158879.1.peg.1968rxn05390	0.780085		COMMON	fig|158879.1.peg.1968	rxn05390	fig|158879.1.peg.1968rxn05390	0.780085
COMMON	fig|158879.1.peg.1968	rxn05402	fig|158879.1.peg.1968rxn05402	0.780085		COMMON	fig|158879.1.peg.1968	rxn05402	fig|158879.1.peg.1968rxn05402	0.780085
COMMON	fig|158879.1.peg.1968	rxn05386	fig|158879.1.peg.1968rxn05386	0.780085		COMMON	fig|158879.1.peg.1968	rxn05386	fig|158879.1.peg.1968rxn05386	0.780085
COMMON	fig|158879.1.peg.1968	rxn05394	fig|158879.1.peg.1968rxn05394	0.780085		COMMON	fig|158879.1.peg.1968	rxn05394	fig|158879.1.peg.1968rxn05394	0.780085
COMMON	fig|158879.1.peg.1968	rxn05377	fig|158879.1.peg.1968rxn05377	0.780085		COMMON	fig|158879.1.peg.1968	rxn05377	fig|158879.1.peg.1968rxn05377	0.780085
COMMON	fig|158879.1.peg.1968	rxn05398	fig|158879.1.peg.1968rxn05398	0.780085		COMMON	fig|158879.1.peg.1968	rxn05398	fig|158879.1.peg.1968rxn05398	0.780085
COMMON	fig|158879.1.peg.1968	rxn05332	fig|158879.1.peg.1968rxn05332	0.780085		COMMON	fig|158879.1.peg.1968	rxn05332	fig|158879.1.peg.1968rxn05332	0.780085
COMMON	fig|158879.1.peg.1968	rxn05373	fig|158879.1.peg.1968rxn05373	0.780085		COMMON	fig|158879.1.peg.1968	rxn05373	fig|158879.1.peg.1968rxn05373	0.780085
COMMON	fig|158879.1.peg.1968	rxn05369	fig|158879.1.peg.1968rxn05369	0.780085		COMMON	fig|158879.1.peg.1968	rxn05369	fig|158879.1.peg.1968rxn05369	0.780085
COMMON	fig|158879.1.peg.1968	rxn05331	fig|158879.1.peg.1968rxn05331	0.780085		COMMON	fig|158879.1.peg.1968	rxn05331	fig|158879.1.peg.1968rxn05331	0.780085
COMMON	fig|158879.1.peg.1968	rxn05330	fig|158879.1.peg.1968rxn05330	0.780085		COMMON	fig|158879.1.peg.1968	rxn05330	fig|158879.1.peg.1968rxn05330	0.780085
COMMON	fig|158879.1.peg.1968	rxn05462	fig|158879.1.peg.1968rxn05462	0.780085		COMMON	fig|158879.1.peg.1968	rxn05462	fig|158879.1.peg.1968rxn05462	0.780085
COMMON	fig|158879.1.peg.1968	rxn05335	fig|158879.1.peg.1968rxn05335	0.780085		COMMON	fig|158879.1.peg.1968	rxn05335	fig|158879.1.peg.1968rxn05335	0.780085
COMMON	fig|158879.1.peg.1968	rxn05334	fig|158879.1.peg.1968rxn05334	0.780085		COMMON	fig|158879.1.peg.1968	rxn05334	fig|158879.1.peg.1968rxn05334	0.780085
COMMON	fig|158879.1.peg.1968	rxn05329	fig|158879.1.peg.1968rxn05329	0.780085		COMMON	fig|158879.1.peg.1968	rxn05329	fig|158879.1.peg.1968rxn05329	0.780085
COMMON	fig|158879.1.peg.1968	rxn05406	fig|158879.1.peg.1968rxn05406	0.780085		COMMON	fig|158879.1.peg.1968	rxn05406	fig|158879.1.peg.1968rxn05406	0.780085
COMMON	fig|158879.1.peg.1968	rxn05365	fig|158879.1.peg.1968rxn05365	0.780085		COMMON	fig|158879.1.peg.1968	rxn05365	fig|158879.1.peg.1968rxn05365	0.780085
COMMON	fig|158879.1.peg.1968	rxn05361	fig|158879.1.peg.1968rxn05361	0.780085		COMMON	fig|158879.1.peg.1968	rxn05361	fig|158879.1.peg.1968rxn05361	0.780085
COMMON	fig|158879.1.peg.925	rxn11703	fig|158879.1.peg.925rxn11703	0.790242		COMMON	fig|158879.1.peg.925	rxn11703	fig|158879.1.peg.925rxn11703	0.790242
COMMON	fig|158879.1.peg.900	rxn02011	fig|158879.1.peg.900rxn02011	0.892157		COMMON	fig|158879.1.peg.900	rxn02011	fig|158879.1.peg.900rxn02011	0.892157
COMMON	fig|158879.1.peg.787	rxn11946	fig|158879.1.peg.787rxn11946	0.0563347		COMMON	fig|158879.1.peg.787	rxn11946	fig|158879.1.peg.787rxn11946	0.0563347
COMMON	fig|158879.1.peg.787	rxn03395	fig|158879.1.peg.787rxn03395	0.0563347		COMMON	fig|158879.1.peg.787	rxn03395	fig|158879.1.peg.787rxn03395	0.0563347
COMMON	fig|158879.1.peg.922	rxn08333	fig|158879.1.peg.922rxn08333	0.494756		COMMON	fig|158879.1.peg.922	rxn08333	fig|158879.1.peg.922rxn08333	0.494756
COMMON	fig|158879.1.peg.626	rxn01022	fig|158879.1.peg.626rxn01022	0.0210971		COMMON	fig|158879.1.peg.626	rxn01022	fig|158879.1.peg.626rxn01022	0.0210971
COMMON	fig|158879.1.peg.2186	rxn02160	fig|158879.1.peg.2186rxn02160	0.143573		COMMON	fig|158879.1.peg.2186	rxn02160	fig|158879.1.peg.2186rxn02160	0.143573
COMMON	fig|158879.1.peg.2470	rxn11946	fig|158879.1.peg.2470rxn11946	0.0563347		COMMON	fig|158879.1.peg.2470	rxn11946	fig|158879.1.peg.2470rxn11946	0.0563347
COMMON	fig|158879.1.peg.2470	rxn03395	fig|158879.1.peg.2470rxn03395	0.0563347		COMMON	fig|158879.1.peg.2470	rxn03395	fig|158879.1.peg.2470rxn03395	0.0563347
COMMON	fig|158879.1.peg.1136	rxn01517	fig|158879.1.peg.1136rxn01517	0.970087		COMMON	fig|158879.1.peg.1136	rxn01517	fig|158879.1.peg.1136rxn01517	0.970087
COMMON	fig|158879.1.peg.1136	rxn00119	fig|158879.1.peg.1136rxn00119	0.970087		COMMON	fig|158879.1.peg.1136	rxn00119	fig|158879.1.peg.1136rxn00119	0.970087
COMMON	fig|158879.1.peg.1347	rxn03397	fig|158879.1.peg.1347rxn03397	0.694155		COMMON	fig|158879.1.peg.1347	rxn03397	fig|158879.1.peg.1347rxn03397	0.694155
COMMON	fig|158879.1.peg.1347	rxn10094	fig|158879.1.peg.1347rxn10094	0.694155		COMMON	fig|158879.1.peg.1347	rxn10094	fig|158879.1.peg.1347rxn10094	0.694155
COMMON	fig|158879.1.peg.324	rxn01618	fig|158879.1.peg.324rxn01618	0.568184		COMMON	fig|158879.1.peg.324	rxn01618	fig|158879.1.peg.324rxn01618	0.568184
COMMON	fig|158879.1.peg.1293	rxn09106	fig|158879.1.peg.1293rxn09106	0.493174		COMMON	fig|158879.1.peg.1293	rxn09106	fig|158879.1.peg.1293rxn09106	0.493174
COMMON	fig|158879.1.peg.1293	rxn09107	fig|158879.1.peg.1293rxn09107	0.493174		COMMON	fig|158879.1.peg.1293	rxn09107	fig|158879.1.peg.1293rxn09107	0.493174
COMMON	fig|158879.1.peg.1293	rxn09104	fig|158879.1.peg.1293rxn09104	0.493174		COMMON	fig|158879.1.peg.1293	rxn09104	fig|158879.1.peg.1293rxn09104	0.493174
COMMON	fig|158879.1.peg.1293	rxn09105	fig|158879.1.peg.1293rxn09105	0.493174		COMMON	fig|158879.1.peg.1293	rxn09105	fig|158879.1.peg.1293rxn09105	0.493174
COMMON	fig|158879.1.peg.1293	rxn09102	fig|158879.1.peg.1293rxn09102	0.493174		COMMON	fig|158879.1.peg.1293	rxn09102	fig|158879.1.peg.1293rxn09102	0.493174
COMMON	fig|158879.1.peg.1293	rxn09103	fig|158879.1.peg.1293rxn09103	0.493174		COMMON	fig|158879.1.peg.1293	rxn09103	fig|158879.1.peg.1293rxn09103	0.493174
COMMON	fig|158879.1.peg.1293	rxn09101	fig|158879.1.peg.1293rxn09101	0.493174		COMMON	fig|158879.1.peg.1293	rxn09101	fig|158879.1.peg.1293rxn09101	0.493174
COMMON	fig|158879.1.peg.1293	rxn10265	fig|158879.1.peg.1293rxn10265	0.493174		COMMON	fig|158879.1.peg.1293	rxn10265	fig|158879.1.peg.1293rxn10265	0.493174
COMMON	fig|158879.1.peg.1293	rxn10266	fig|158879.1.peg.1293rxn10266	0.493174		COMMON	fig|158879.1.peg.1293	rxn10266	fig|158879.1.peg.1293rxn10266	0.493174
COMMON	fig|158879.1.peg.49	rxn11946	fig|158879.1.peg.49rxn11946	0.0573492		COMMON	fig|158879.1.peg.49	rxn11946	fig|158879.1.peg.49rxn11946	0.0573492
COMMON	fig|158879.1.peg.49	rxn03395	fig|158879.1.peg.49rxn03395	0.0573492		COMMON	fig|158879.1.peg.49	rxn03395	fig|158879.1.peg.49rxn03395	0.0573492
COMMON	fig|158879.1.peg.1388	rxn01973	fig|158879.1.peg.1388rxn01973	0.13684		COMMON	fig|158879.1.peg.1388	rxn01973	fig|158879.1.peg.1388rxn01973	0.13684
COMMON	fig|158879.1.peg.2013	rxn00717	fig|158879.1.peg.2013rxn00717	0.101736		COMMON	fig|158879.1.peg.2013	rxn00717	fig|158879.1.peg.2013rxn00717	0.101736
COMMON	fig|158879.1.peg.2017	rxn11946	fig|158879.1.peg.2017rxn11946	0.0563347		COMMON	fig|158879.1.peg.2017	rxn11946	fig|158879.1.peg.2017rxn11946	0.0563347
COMMON	fig|158879.1.peg.2017	rxn03395	fig|158879.1.peg.2017rxn03395	0.0563347		COMMON	fig|158879.1.peg.2017	rxn03395	fig|158879.1.peg.2017rxn03395	0.0563347
COMMON	fig|158879.1.peg.697	rxn00748	fig|158879.1.peg.697rxn00748	0.621833		COMMON	fig|158879.1.peg.697	rxn00748	fig|158879.1.peg.697rxn00748	0.621833
COMMON	fig|158879.1.peg.1495	rxn00756	fig|158879.1.peg.1495rxn00756	0.00778874		COMMON	fig|158879.1.peg.1495	rxn00756	fig|158879.1.peg.1495rxn00756	0.00778874
COMMON	fig|158879.1.peg.2448	rxn01834	fig|158879.1.peg.2448rxn01834	0.119858		COMMON	fig|158879.1.peg.2448	rxn01834	fig|158879.1.peg.2448rxn01834	0.119858
COMMON	fig|158879.1.peg.2203	rxn05416	fig|158879.1.peg.2203rxn05416	0.333939		COMMON	fig|158879.1.peg.2203	rxn05416	fig|158879.1.peg.2203rxn05416	0.333939
COMMON	fig|158879.1.peg.2203	rxn05412	fig|158879.1.peg.2203rxn05412	0.333939		COMMON	fig|158879.1.peg.2203	rxn05412	fig|158879.1.peg.2203rxn05412	0.333939
COMMON	fig|158879.1.peg.2203	rxn05357	fig|158879.1.peg.2203rxn05357	0.333939		COMMON	fig|158879.1.peg.2203	rxn05357	fig|158879.1.peg.2203rxn05357	0.333939
COMMON	fig|158879.1.peg.2203	rxn05356	fig|158879.1.peg.2203rxn05356	0.333939		COMMON	fig|158879.1.peg.2203	rxn05356	fig|158879.1.peg.2203rxn05356	0.333939
COMMON	fig|158879.1.peg.2203	rxn05353	fig|158879.1.peg.2203rxn05353	0.333939		COMMON	fig|158879.1.peg.2203	rxn05353	fig|158879.1.peg.2203rxn05353	0.333939
COMMON	fig|158879.1.peg.2203	rxn05352	fig|158879.1.peg.2203rxn05352	0.333939		COMMON	fig|158879.1.peg.2203	rxn05352	fig|158879.1.peg.2203rxn05352	0.333939
COMMON	fig|158879.1.peg.2203	rxn05432	fig|158879.1.peg.2203rxn05432	0.333939		COMMON	fig|158879.1.peg.2203	rxn05432	fig|158879.1.peg.2203rxn05432	0.333939
COMMON	fig|158879.1.peg.2203	rxn05424	fig|158879.1.peg.2203rxn05424	0.333939		COMMON	fig|158879.1.peg.2203	rxn05424	fig|158879.1.peg.2203rxn05424	0.333939
COMMON	fig|158879.1.peg.2203	rxn05420	fig|158879.1.peg.2203rxn05420	0.333939		COMMON	fig|158879.1.peg.2203	rxn05420	fig|158879.1.peg.2203rxn05420	0.333939
COMMON	fig|158879.1.peg.2203	rxn05428	fig|158879.1.peg.2203rxn05428	0.333939		COMMON	fig|158879.1.peg.2203	rxn05428	fig|158879.1.peg.2203rxn05428	0.333939
COMMON	fig|169963.1.peg.1187	rxn03491	fig|169963.1.peg.1187rxn03491	0.883813		COMMON	fig|169963.1.peg.1187	rxn03491	fig|169963.1.peg.1187rxn03491	0.883813
COMMON	fig|169963.1.peg.1201	rxn05029	fig|169963.1.peg.1201rxn05029	0.984527		COMMON	fig|169963.1.peg.1201	rxn05029	fig|169963.1.peg.1201rxn05029	0.984527
COMMON	fig|169963.1.peg.1183	rxn06979	fig|169963.1.peg.1183rxn06979	0.99231		COMMON	fig|169963.1.peg.1183	rxn06979	fig|169963.1.peg.1183rxn06979	0.99231
COMMON	fig|169963.1.peg.1183	rxn11544	fig|169963.1.peg.1183rxn11544	0.99231		COMMON	fig|169963.1.peg.1183	rxn11544	fig|169963.1.peg.1183rxn11544	0.99231
COMMON	fig|169963.1.peg.919	rxn00756	fig|169963.1.peg.919rxn00756	1.36795e-05		COMMON	fig|169963.1.peg.919	rxn00756	fig|169963.1.peg.919rxn00756	1.36795e-05
COMMON	fig|169963.1.peg.1188	rxn03491	fig|169963.1.peg.1188rxn03491	0.902983		COMMON	fig|169963.1.peg.1188	rxn03491	fig|169963.1.peg.1188rxn03491	0.902983
COMMON	fig|169963.1.peg.1669	rxn08333	fig|169963.1.peg.1669rxn08333	0.530442		COMMON	fig|169963.1.peg.1669	rxn08333	fig|169963.1.peg.1669rxn08333	0.530442
COMMON	fig|169963.1.peg.2709	rxn00669	fig|169963.1.peg.2709rxn00669	0.922167		COMMON	fig|169963.1.peg.2709	rxn00669	fig|169963.1.peg.2709rxn00669	0.922167
COMMON	fig|169963.1.peg.1072	rxn10197	fig|169963.1.peg.1072rxn10197	0.029083		COMMON	fig|169963.1.peg.1072	rxn10197	fig|169963.1.peg.1072rxn10197	0.029083
COMMON	fig|169963.1.peg.906	rxn00979	fig|169963.1.peg.906rxn00979	0.0716649		COMMON	fig|169963.1.peg.906	rxn00979	fig|169963.1.peg.906rxn00979	0.0716649
COMMON	fig|169963.1.peg.906	rxn01053	fig|169963.1.peg.906rxn01053	0.115791		COMMON	fig|169963.1.peg.906	rxn01053	fig|169963.1.peg.906rxn01053	0.115791
COMMON	fig|169963.1.peg.1666	rxn11703	fig|169963.1.peg.1666rxn11703	0.877492		COMMON	fig|169963.1.peg.1666	rxn11703	fig|169963.1.peg.1666rxn11703	0.877492
COMMON	fig|169963.1.peg.2545	rxn10302	fig|169963.1.peg.2545rxn10302	0.011817		COMMON	fig|169963.1.peg.2545	rxn10302	fig|169963.1.peg.2545rxn10302	0.011817
COMMON	fig|169963.1.peg.2545	rxn10193	fig|169963.1.peg.2545rxn10193	0.011817		COMMON	fig|169963.1.peg.2545	rxn10193	fig|169963.1.peg.2545rxn10193	0.011817
COMMON	fig|169963.1.peg.2545	rxn10300	fig|169963.1.peg.2545rxn10300	0.011817		COMMON	fig|169963.1.peg.2545	rxn10300	fig|169963.1.peg.2545rxn10300	0.011817
COMMON	fig|169963.1.peg.2545	rxn10301	fig|169963.1.peg.2545rxn10301	0.011817		COMMON	fig|169963.1.peg.2545	rxn10301	fig|169963.1.peg.2545rxn10301	0.011817
COMMON	fig|169963.1.peg.975	rxn00205	fig|169963.1.peg.975rxn00205	0.929206		COMMON	fig|169963.1.peg.975	rxn00205	fig|169963.1.peg.975rxn00205	0.929206
COMMON	fig|169963.1.peg.1615	rxn09106	fig|169963.1.peg.1615rxn09106	0.513679		COMMON	fig|169963.1.peg.1615	rxn09106	fig|169963.1.peg.1615rxn09106	0.513679
COMMON	fig|169963.1.peg.1615	rxn09107	fig|169963.1.peg.1615rxn09107	0.513679		COMMON	fig|169963.1.peg.1615	rxn09107	fig|169963.1.peg.1615rxn09107	0.513679
COMMON	fig|169963.1.peg.1615	rxn09104	fig|169963.1.peg.1615rxn09104	0.513679		COMMON	fig|169963.1.peg.1615	rxn09104	fig|169963.1.peg.1615rxn09104	0.513679
COMMON	fig|169963.1.peg.1615	rxn09105	fig|169963.1.peg.1615rxn09105	0.513679		COMMON	fig|169963.1.peg.1615	rxn09105	fig|169963.1.peg.1615rxn09105	0.513679
COMMON	fig|169963.1.peg.1615	rxn09102	fig|169963.1.peg.1615rxn09102	0.513679		COMMON	fig|169963.1.peg.1615	rxn09102	fig|169963.1.peg.1615rxn09102	0.513679
COMMON	fig|169963.1.peg.1615	rxn09103	fig|169963.1.peg.1615rxn09103	0.513679		COMMON	fig|169963.1.peg.1615	rxn09103	fig|169963.1.peg.1615rxn09103	0.513679
COMMON	fig|169963.1.peg.1615	rxn09101	fig|169963.1.peg.1615rxn09101	0.513679		COMMON	fig|169963.1.peg.1615	rxn09101	fig|169963.1.peg.1615rxn09101	0.513679
COMMON	fig|169963.1.peg.1615	rxn10265	fig|169963.1.peg.1615rxn10265	0.513679		COMMON	fig|169963.1.peg.1615	rxn10265	fig|169963.1.peg.1615rxn10265	0.513679
COMMON	fig|169963.1.peg.1615	rxn10266	fig|169963.1.peg.1615rxn10266	0.513679		COMMON	fig|169963.1.peg.1615	rxn10266	fig|169963.1.peg.1615rxn10266	0.513679
COMMON	fig|169963.1.peg.520	rxn09199	fig|169963.1.peg.520rxn09199	0.487179		COMMON	fig|169963.1.peg.520	rxn09199	fig|169963.1.peg.520rxn09199	0.487179
COMMON	fig|169963.1.peg.520	rxn10232	fig|169963.1.peg.520rxn10232	0.487179		COMMON	fig|169963.1.peg.520	rxn10232	fig|169963.1.peg.520rxn10232	0.487179
COMMON	fig|169963.1.peg.520	rxn10233	fig|169963.1.peg.520rxn10233	0.487179		COMMON	fig|169963.1.peg.520	rxn10233	fig|169963.1.peg.520rxn10233	0.487179
COMMON	fig|169963.1.peg.520	rxn09202	fig|169963.1.peg.520rxn09202	0.487179		COMMON	fig|169963.1.peg.520	rxn09202	fig|169963.1.peg.520rxn09202	0.487179
COMMON	fig|169963.1.peg.819	rxn01501	fig|169963.1.peg.819rxn01501	0.979815		COMMON	fig|169963.1.peg.819	rxn01501	fig|169963.1.peg.819rxn01501	0.979815
COMMON	fig|169963.1.peg.2100	rxn09953	fig|169963.1.peg.2100rxn09953	0.0968104		COMMON	fig|169963.1.peg.2100	rxn09953	fig|169963.1.peg.2100rxn09953	0.0968104
COMMON	fig|169963.1.peg.2514	rxn05381	fig|169963.1.peg.2514rxn05381	0.759262		COMMON	fig|169963.1.peg.2514	rxn05381	fig|169963.1.peg.2514rxn05381	0.759262
COMMON	fig|169963.1.peg.2514	rxn05390	fig|169963.1.peg.2514rxn05390	0.759262		COMMON	fig|169963.1.peg.2514	rxn05390	fig|169963.1.peg.2514rxn05390	0.759262
COMMON	fig|169963.1.peg.2514	rxn05402	fig|169963.1.peg.2514rxn05402	0.759262		COMMON	fig|169963.1.peg.2514	rxn05402	fig|169963.1.peg.2514rxn05402	0.759262
COMMON	fig|169963.1.peg.2514	rxn05386	fig|169963.1.peg.2514rxn05386	0.759262		COMMON	fig|169963.1.peg.2514	rxn05386	fig|169963.1.peg.2514rxn05386	0.759262
COMMON	fig|169963.1.peg.2514	rxn05394	fig|169963.1.peg.2514rxn05394	0.759262		COMMON	fig|169963.1.peg.2514	rxn05394	fig|169963.1.peg.2514rxn05394	0.759262
COMMON	fig|169963.1.peg.2514	rxn05377	fig|169963.1.peg.2514rxn05377	0.759262		COMMON	fig|169963.1.peg.2514	rxn05377	fig|169963.1.peg.2514rxn05377	0.759262
COMMON	fig|169963.1.peg.2514	rxn05398	fig|169963.1.peg.2514rxn05398	0.759262		COMMON	fig|169963.1.peg.2514	rxn05398	fig|169963.1.peg.2514rxn05398	0.759262
COMMON	fig|169963.1.peg.2514	rxn05332	fig|169963.1.peg.2514rxn05332	0.759262		COMMON	fig|169963.1.peg.2514	rxn05332	fig|169963.1.peg.2514rxn05332	0.759262
COMMON	fig|169963.1.peg.2514	rxn05373	fig|169963.1.peg.2514rxn05373	0.759262		COMMON	fig|169963.1.peg.2514	rxn05373	fig|169963.1.peg.2514rxn05373	0.759262
COMMON	fig|169963.1.peg.2514	rxn05369	fig|169963.1.peg.2514rxn05369	0.759262		COMMON	fig|169963.1.peg.2514	rxn05369	fig|169963.1.peg.2514rxn05369	0.759262
COMMON	fig|169963.1.peg.2514	rxn05331	fig|169963.1.peg.2514rxn05331	0.759262		COMMON	fig|169963.1.peg.2514	rxn05331	fig|169963.1.peg.2514rxn05331	0.759262
COMMON	fig|169963.1.peg.2514	rxn05330	fig|169963.1.peg.2514rxn05330	0.759262		COMMON	fig|169963.1.peg.2514	rxn05330	fig|169963.1.peg.2514rxn05330	0.759262
COMMON	fig|169963.1.peg.2514	rxn05333	fig|169963.1.peg.2514rxn05333	0.759262		COMMON	fig|169963.1.peg.2514	rxn05333	fig|169963.1.peg.2514rxn05333	0.759262
COMMON	fig|169963.1.peg.2514	rxn05462	fig|169963.1.peg.2514rxn05462	0.759262		COMMON	fig|169963.1.peg.2514	rxn05462	fig|169963.1.peg.2514rxn05462	0.759262
COMMON	fig|169963.1.peg.2514	rxn05334	fig|169963.1.peg.2514rxn05334	0.759262		COMMON	fig|169963.1.peg.2514	rxn05334	fig|169963.1.peg.2514rxn05334	0.759262
COMMON	fig|169963.1.peg.2514	rxn05329	fig|169963.1.peg.2514rxn05329	0.759262		COMMON	fig|169963.1.peg.2514	rxn05329	fig|169963.1.peg.2514rxn05329	0.759262
COMMON	fig|169963.1.peg.2514	rxn05406	fig|169963.1.peg.2514rxn05406	0.759262		COMMON	fig|169963.1.peg.2514	rxn05406	fig|169963.1.peg.2514rxn05406	0.759262
COMMON	fig|169963.1.peg.2514	rxn05365	fig|169963.1.peg.2514rxn05365	0.759262		COMMON	fig|169963.1.peg.2514	rxn05365	fig|169963.1.peg.2514rxn05365	0.759262
COMMON	fig|169963.1.peg.2514	rxn05361	fig|169963.1.peg.2514rxn05361	0.759262		COMMON	fig|169963.1.peg.2514	rxn05361	fig|169963.1.peg.2514rxn05361	0.759262
COMMON	fig|169963.1.peg.280	rxn01630	fig|169963.1.peg.280rxn01630	0.0665784		COMMON	fig|169963.1.peg.280	rxn01630	fig|169963.1.peg.280rxn01630	0.0665784
COMMON	fig|169963.1.peg.1305	rxn00119	fig|169963.1.peg.1305rxn00119	0.984871		COMMON	fig|169963.1.peg.1305	rxn00119	fig|169963.1.peg.1305rxn00119	0.984871
COMMON	fig|169963.1.peg.2008	rxn09106	fig|169963.1.peg.2008rxn09106	0.577114		COMMON	fig|169963.1.peg.2008	rxn09106	fig|169963.1.peg.2008rxn09106	0.577114
COMMON	fig|169963.1.peg.2008	rxn09107	fig|169963.1.peg.2008rxn09107	0.577114		COMMON	fig|169963.1.peg.2008	rxn09107	fig|169963.1.peg.2008rxn09107	0.577114
COMMON	fig|169963.1.peg.2008	rxn09104	fig|169963.1.peg.2008rxn09104	0.577114		COMMON	fig|169963.1.peg.2008	rxn09104	fig|169963.1.peg.2008rxn09104	0.577114
COMMON	fig|169963.1.peg.2008	rxn09105	fig|169963.1.peg.2008rxn09105	0.577114		COMMON	fig|169963.1.peg.2008	rxn09105	fig|169963.1.peg.2008rxn09105	0.577114
COMMON	fig|169963.1.peg.2008	rxn09102	fig|169963.1.peg.2008rxn09102	0.577114		COMMON	fig|169963.1.peg.2008	rxn09102	fig|169963.1.peg.2008rxn09102	0.577114
COMMON	fig|169963.1.peg.2008	rxn09103	fig|169963.1.peg.2008rxn09103	0.577114		COMMON	fig|169963.1.peg.2008	rxn09103	fig|169963.1.peg.2008rxn09103	0.577114
COMMON	fig|169963.1.peg.2008	rxn09101	fig|169963.1.peg.2008rxn09101	0.577114		COMMON	fig|169963.1.peg.2008	rxn09101	fig|169963.1.peg.2008rxn09101	0.577114
COMMON	fig|169963.1.peg.2008	rxn10265	fig|169963.1.peg.2008rxn10265	0.577114		COMMON	fig|169963.1.peg.2008	rxn10265	fig|169963.1.peg.2008rxn10265	0.577114
COMMON	fig|169963.1.peg.2008	rxn10266	fig|169963.1.peg.2008rxn10266	0.577114		COMMON	fig|169963.1.peg.2008	rxn10266	fig|169963.1.peg.2008rxn10266	0.577114
COMMON	fig|169963.1.peg.2085	rxn05104	fig|169963.1.peg.2085rxn05104	0.041094		COMMON	fig|169963.1.peg.2085	rxn05104	fig|169963.1.peg.2085rxn05104	0.041094
COMMON	fig|169963.1.peg.341	rxn05040	fig|169963.1.peg.341rxn05040	0.00639218		COMMON	fig|169963.1.peg.341	rxn05040	fig|169963.1.peg.341rxn05040	0.00639218
COMMON	fig|169963.1.peg.1077	rxn10291	fig|169963.1.peg.1077rxn10291	0.182392		COMMON	fig|169963.1.peg.1077	rxn10291	fig|169963.1.peg.1077rxn10291	0.182392
COMMON	fig|169963.1.peg.1077	rxn10292	fig|169963.1.peg.1077rxn10292	0.182392		COMMON	fig|169963.1.peg.1077	rxn10292	fig|169963.1.peg.1077rxn10292	0.182392
COMMON	fig|169963.1.peg.1077	rxn10293	fig|169963.1.peg.1077rxn10293	0.182392		COMMON	fig|169963.1.peg.1077	rxn10293	fig|169963.1.peg.1077rxn10293	0.182392
COMMON	fig|169963.1.peg.2935	rxn09199	fig|169963.1.peg.2935rxn09199	0.431018		COMMON	fig|169963.1.peg.2935	rxn09199	fig|169963.1.peg.2935rxn09199	0.431018
COMMON	fig|169963.1.peg.2935	rxn10232	fig|169963.1.peg.2935rxn10232	0.431018		COMMON	fig|169963.1.peg.2935	rxn10232	fig|169963.1.peg.2935rxn10232	0.431018
COMMON	fig|169963.1.peg.2935	rxn10233	fig|169963.1.peg.2935rxn10233	0.431018		COMMON	fig|169963.1.peg.2935	rxn10233	fig|169963.1.peg.2935rxn10233	0.431018
COMMON	fig|169963.1.peg.2935	rxn09202	fig|169963.1.peg.2935rxn09202	0.431018		COMMON	fig|169963.1.peg.2935	rxn09202	fig|169963.1.peg.2935rxn09202	0.431018
COMMON	fig|169963.1.peg.1191	rxn03513	fig|169963.1.peg.1191rxn03513	0.980328		COMMON	fig|169963.1.peg.1191	rxn03513	fig|169963.1.peg.1191rxn03513	0.980328
COMMON	fig|169963.1.peg.1191	rxn04047	fig|169963.1.peg.1191rxn04047	0.980328		COMMON	fig|169963.1.peg.1191	rxn04047	fig|169963.1.peg.1191rxn04047	0.980328
COMMON	fig|169963.1.peg.1192	rxn03492	fig|169963.1.peg.1192rxn03492	0.961021		COMMON	fig|169963.1.peg.1192	rxn03492	fig|169963.1.peg.1192rxn03492	0.961021
COMMON	fig|169963.1.peg.1192	rxn04050	fig|169963.1.peg.1192rxn04050	0.961021		COMMON	fig|169963.1.peg.1192	rxn04050	fig|169963.1.peg.1192rxn04050	0.961021
COMMON	fig|169963.1.peg.1469	rxn01618	fig|169963.1.peg.1469rxn01618	0.57711		COMMON	fig|169963.1.peg.1469	rxn01618	fig|169963.1.peg.1469rxn01618	0.57711
COMMON	fig|169963.1.peg.1427	rxn01644	fig|169963.1.peg.1427rxn01644	0.0393207		COMMON	fig|169963.1.peg.1427	rxn01644	fig|169963.1.peg.1427rxn01644	0.0393207
COMMON	fig|169963.1.peg.2080	rxn01022	fig|169963.1.peg.2080rxn01022	0.493404		COMMON	fig|169963.1.peg.2080	rxn01022	fig|169963.1.peg.2080rxn01022	0.493404
COMMON	fig|169963.1.peg.2420	rxn05515	fig|169963.1.peg.2420rxn05515	0.127664		COMMON	fig|169963.1.peg.2420	rxn05515	fig|169963.1.peg.2420rxn05515	0.127664
COMMON	fig|169963.1.peg.2420	rxn10147	fig|169963.1.peg.2420rxn10147	0.127664		COMMON	fig|169963.1.peg.2420	rxn10147	fig|169963.1.peg.2420rxn10147	0.127664
COMMON	fig|169963.1.peg.2632	rxn03167	fig|169963.1.peg.2632rxn03167	0.781596		COMMON	fig|169963.1.peg.2632	rxn03167	fig|169963.1.peg.2632rxn03167	0.781596
COMMON	fig|169963.1.peg.1140	rxn03538	fig|169963.1.peg.1140rxn03538	0.90317		COMMON	fig|169963.1.peg.1140	rxn03538	fig|169963.1.peg.1140rxn03538	0.90317
COMMON	fig|169963.1.peg.805	rxn00102	fig|169963.1.peg.805rxn00102	0.892662		COMMON	fig|169963.1.peg.805	rxn00102	fig|169963.1.peg.805rxn00102	0.892662
COMMON	fig|169963.1.peg.1456	rxn08299	fig|169963.1.peg.1456rxn08299	0.959496		COMMON	fig|169963.1.peg.1456	rxn08299	fig|169963.1.peg.1456rxn08299	0.959496
COMMON	fig|169963.1.peg.1456	rxn10253	fig|169963.1.peg.1456rxn10253	0.959496		COMMON	fig|169963.1.peg.1456	rxn10253	fig|169963.1.peg.1456rxn10253	0.959496
COMMON	fig|169963.1.peg.1456	rxn10254	fig|169963.1.peg.1456rxn10254	0.959496		COMMON	fig|169963.1.peg.1456	rxn10254	fig|169963.1.peg.1456rxn10254	0.959496
COMMON	fig|169963.1.peg.1898	rxn02929	fig|169963.1.peg.1898rxn02929	0.246982		COMMON	fig|169963.1.peg.1898	rxn02929	fig|169963.1.peg.1898rxn02929	0.246982
COMMON	fig|169963.1.peg.1702	rxn00623	fig|169963.1.peg.1702rxn00623	0.00756582		COMMON	fig|169963.1.peg.1702	rxn00623	fig|169963.1.peg.1702rxn00623	0.00756582
COMMON	fig|169963.1.peg.1156	rxn05029	fig|169963.1.peg.1156rxn05029	0.962129		COMMON	fig|169963.1.peg.1156	rxn05029	fig|169963.1.peg.1156rxn05029	0.962129
COMMON	fig|169963.1.peg.2051	rxn03991	fig|169963.1.peg.2051rxn03991	0.575925		COMMON	fig|169963.1.peg.2051	rxn03991	fig|169963.1.peg.2051rxn03991	0.575925
COMMON	fig|169963.1.peg.110	rxn01022	fig|169963.1.peg.110rxn01022	0.408311		COMMON	fig|169963.1.peg.110	rxn01022	fig|169963.1.peg.110rxn01022	0.408311
COMMON	fig|169963.1.peg.2117	rxn08129	fig|169963.1.peg.2117rxn08129	0.0144989		COMMON	fig|169963.1.peg.2117	rxn08129	fig|169963.1.peg.2117rxn08129	0.0144989
COMMON	fig|169963.1.peg.351	rxn00669	fig|169963.1.peg.351rxn00669	0.035558		COMMON	fig|169963.1.peg.351	rxn00669	fig|169963.1.peg.351rxn00669	0.035558
COMMON	fig|169963.1.peg.351	rxn05736	fig|169963.1.peg.351rxn05736	0.628644		COMMON	fig|169963.1.peg.351	rxn05736	fig|169963.1.peg.351rxn05736	0.628644
COMMON	fig|169963.1.peg.351	rxn00988	fig|169963.1.peg.351rxn00988	0.628644		COMMON	fig|169963.1.peg.351	rxn00988	fig|169963.1.peg.351rxn00988	0.628644
COMMON	fig|169963.1.peg.351	rxn00947	fig|169963.1.peg.351rxn00947	0.628644		COMMON	fig|169963.1.peg.351	rxn00947	fig|169963.1.peg.351rxn00947	0.628644
COMMON	fig|169963.1.peg.351	rxn09449	fig|169963.1.peg.351rxn09449	0.628644		COMMON	fig|169963.1.peg.351	rxn09449	fig|169963.1.peg.351rxn09449	0.628644
COMMON	fig|171101.1.peg.1325	rxn09272	fig|171101.1.peg.1325rxn09272	0.927932		COMMON	fig|171101.1.peg.1325	rxn09272	fig|171101.1.peg.1325rxn09272	0.927932
COMMON	fig|171101.1.peg.1325	rxn08528	fig|171101.1.peg.1325rxn08528	0.927932		COMMON	fig|171101.1.peg.1325	rxn08528	fig|171101.1.peg.1325rxn08528	0.927932
COMMON	fig|171101.1.peg.1325	rxn08527	fig|171101.1.peg.1325rxn08527	0.927932		COMMON	fig|171101.1.peg.1325	rxn08527	fig|171101.1.peg.1325rxn08527	0.927932
COMMON	fig|171101.1.peg.1324	rxn09272	fig|171101.1.peg.1324rxn09272	0.901161		COMMON	fig|171101.1.peg.1324	rxn09272	fig|171101.1.peg.1324rxn09272	0.901161
COMMON	fig|171101.1.peg.1324	rxn08528	fig|171101.1.peg.1324rxn08528	0.901161		COMMON	fig|171101.1.peg.1324	rxn08528	fig|171101.1.peg.1324rxn08528	0.901161
COMMON	fig|171101.1.peg.1324	rxn08527	fig|171101.1.peg.1324rxn08527	0.901161		COMMON	fig|171101.1.peg.1324	rxn08527	fig|171101.1.peg.1324rxn08527	0.901161
COMMON	fig|171101.1.peg.2099	rxn10196	fig|171101.1.peg.2099rxn10196	0.292452		COMMON	fig|171101.1.peg.2099	rxn10196	fig|171101.1.peg.2099rxn10196	0.292452
COMMON	fig|171101.1.peg.2099	rxn10195	fig|171101.1.peg.2099rxn10195	0.292452		COMMON	fig|171101.1.peg.2099	rxn10195	fig|171101.1.peg.2099rxn10195	0.292452
COMMON	fig|171101.1.peg.2099	rxn10194	fig|171101.1.peg.2099rxn10194	0.292452		COMMON	fig|171101.1.peg.2099	rxn10194	fig|171101.1.peg.2099rxn10194	0.292452
COMMON	fig|171101.1.peg.2003	rxn03135	fig|171101.1.peg.2003rxn03135	0.00826048		COMMON	fig|171101.1.peg.2003	rxn03135	fig|171101.1.peg.2003rxn03135	0.00826048
COMMON	fig|171101.1.peg.976	rxn05644	fig|171101.1.peg.976rxn05644	0.283945		COMMON	fig|171101.1.peg.976	rxn05644	fig|171101.1.peg.976rxn05644	0.283945
COMMON	fig|171101.1.peg.1174	rxn00623	fig|171101.1.peg.1174rxn00623	0.0326911		COMMON	fig|171101.1.peg.1174	rxn00623	fig|171101.1.peg.1174rxn00623	0.0326911
COMMON	fig|171101.1.peg.1174	rxn00568	fig|171101.1.peg.1174rxn00568	0.00307121		COMMON	fig|171101.1.peg.1174	rxn00568	fig|171101.1.peg.1174rxn00568	0.00307121
COMMON	fig|171101.1.peg.1114	rxn00076	fig|171101.1.peg.1114rxn00076	0.105194		COMMON	fig|171101.1.peg.1114	rxn00076	fig|171101.1.peg.1114rxn00076	0.105194
COMMON	fig|171101.1.peg.1383	rxn02011	fig|171101.1.peg.1383rxn02011	0.194934		COMMON	fig|171101.1.peg.1383	rxn02011	fig|171101.1.peg.1383rxn02011	0.194934
COMMON	fig|171101.1.peg.919	rxn01644	fig|171101.1.peg.919rxn01644	0.00790187		COMMON	fig|171101.1.peg.919	rxn01644	fig|171101.1.peg.919rxn01644	0.00790187
COMMON	fig|171101.1.peg.919	rxn02988	fig|171101.1.peg.919rxn02988	0.0305104		COMMON	fig|171101.1.peg.919	rxn02988	fig|171101.1.peg.919rxn02988	0.0305104
COMMON	fig|171101.1.peg.628	rxn01537	fig|171101.1.peg.628rxn01537	0.331768		COMMON	fig|171101.1.peg.628	rxn01537	fig|171101.1.peg.628rxn01537	0.331768
COMMON	fig|171101.1.peg.764	rxn04996	fig|171101.1.peg.764rxn04996	0.0404744		COMMON	fig|171101.1.peg.764	rxn04996	fig|171101.1.peg.764rxn04996	0.0404744
COMMON	fig|171101.1.peg.1435	rxn03397	fig|171101.1.peg.1435rxn03397	0.371169		COMMON	fig|171101.1.peg.1435	rxn03397	fig|171101.1.peg.1435rxn03397	0.371169
COMMON	fig|171101.1.peg.1435	rxn10094	fig|171101.1.peg.1435rxn10094	0.371169		COMMON	fig|171101.1.peg.1435	rxn10094	fig|171101.1.peg.1435rxn10094	0.371169
COMMON	fig|171101.1.peg.375	rxn02898	fig|171101.1.peg.375rxn02898	0.00631286		COMMON	fig|171101.1.peg.375	rxn02898	fig|171101.1.peg.375rxn02898	0.00631286
COMMON	fig|171101.1.peg.375	rxn03244	fig|171101.1.peg.375rxn03244	0.00643224		COMMON	fig|171101.1.peg.375	rxn03244	fig|171101.1.peg.375rxn03244	0.00643224
COMMON	fig|171101.1.peg.531	rxn03991	fig|171101.1.peg.531rxn03991	0.0705467		COMMON	fig|171101.1.peg.531	rxn03991	fig|171101.1.peg.531rxn03991	0.0705467
COMMON	fig|171101.1.peg.1413	rxn02929	fig|171101.1.peg.1413rxn02929	0.215545		COMMON	fig|171101.1.peg.1413	rxn02929	fig|171101.1.peg.1413rxn02929	0.215545
COMMON	fig|171101.1.peg.1144	rxn02320	fig|171101.1.peg.1144rxn02320	0.00326939		COMMON	fig|171101.1.peg.1144	rxn02320	fig|171101.1.peg.1144rxn02320	0.00326939
COMMON	fig|171101.1.peg.490	rxn10311	fig|171101.1.peg.490rxn10311	0.00264527		COMMON	fig|171101.1.peg.490	rxn10311	fig|171101.1.peg.490rxn10311	0.00264527
COMMON	fig|171101.1.peg.490	rxn10310	fig|171101.1.peg.490rxn10310	0.00264527		COMMON	fig|171101.1.peg.490	rxn10310	fig|171101.1.peg.490rxn10310	0.00264527
COMMON	fig|171101.1.peg.490	rxn08040	fig|171101.1.peg.490rxn08040	0.00264527		COMMON	fig|171101.1.peg.490	rxn08040	fig|171101.1.peg.490rxn08040	0.00264527
COMMON	fig|171101.1.peg.490	rxn10309	fig|171101.1.peg.490rxn10309	0.00264527		COMMON	fig|171101.1.peg.490	rxn10309	fig|171101.1.peg.490rxn10309	0.00264527
COMMON	fig|171101.1.peg.310	rxn00575	fig|171101.1.peg.310rxn00575	0.394843		COMMON	fig|171101.1.peg.310	rxn00575	fig|171101.1.peg.310rxn00575	0.394843
COMMON	fig|171101.1.peg.310	rxn05746	fig|171101.1.peg.310rxn05746	0.394843		COMMON	fig|171101.1.peg.310	rxn05746	fig|171101.1.peg.310rxn05746	0.394843
COMMON	fig|171101.1.peg.2194	rxn00621	fig|171101.1.peg.2194rxn00621	0.390011		COMMON	fig|171101.1.peg.2194	rxn00621	fig|171101.1.peg.2194rxn00621	0.390011
COMMON	fig|171101.1.peg.72	rxn10197	fig|171101.1.peg.72rxn10197	0.020702		COMMON	fig|171101.1.peg.72	rxn10197	fig|171101.1.peg.72rxn10197	0.020702
COMMON	fig|171101.1.peg.72	rxn10293	fig|171101.1.peg.72rxn10293	0.0288872		COMMON	fig|171101.1.peg.72	rxn10293	fig|171101.1.peg.72rxn10293	0.0288872
COMMON	fig|171101.1.peg.72	rxn10192	fig|171101.1.peg.72rxn10192	0.0288872		COMMON	fig|171101.1.peg.72	rxn10192	fig|171101.1.peg.72rxn10192	0.0288872
COMMON	fig|171101.1.peg.72	rxn10292	fig|171101.1.peg.72rxn10292	0.0288872		COMMON	fig|171101.1.peg.72	rxn10292	fig|171101.1.peg.72rxn10292	0.0288872
COMMON	fig|171101.1.peg.72	rxn10291	fig|171101.1.peg.72rxn10291	0.0288872		COMMON	fig|171101.1.peg.72	rxn10291	fig|171101.1.peg.72rxn10291	0.0288872
COMMON	fig|171101.1.peg.1146	rxn00751	fig|171101.1.peg.1146rxn00751	0.788151		COMMON	fig|171101.1.peg.1146	rxn00751	fig|171101.1.peg.1146rxn00751	0.788151
COMMON	fig|171101.1.peg.2170	rxn03856	fig|171101.1.peg.2170rxn03856	0.0864884		COMMON	fig|171101.1.peg.2170	rxn03856	fig|171101.1.peg.2170rxn03856	0.0864884
COMMON	fig|171101.1.peg.1449	rxn09997	fig|171101.1.peg.1449rxn09997	0.00339383		COMMON	fig|171101.1.peg.1449	rxn09997	fig|171101.1.peg.1449rxn09997	0.00339383
COMMON	fig|171101.1.peg.1586	rxn11946	fig|171101.1.peg.1586rxn11946	0.000371122		COMMON	fig|171101.1.peg.1586	rxn11946	fig|171101.1.peg.1586rxn11946	0.000371122
COMMON	fig|171101.1.peg.1586	rxn03395	fig|171101.1.peg.1586rxn03395	0.000371122		COMMON	fig|171101.1.peg.1586	rxn03395	fig|171101.1.peg.1586rxn03395	0.000371122
COMMON	fig|171101.1.peg.2058	rxn00433	fig|171101.1.peg.2058rxn00433	0.000884132		COMMON	fig|171101.1.peg.2058	rxn00433	fig|171101.1.peg.2058rxn00433	0.000884132
COMMON	fig|171101.1.peg.2058	rxn00269	fig|171101.1.peg.2058rxn00269	0.0730624		COMMON	fig|171101.1.peg.2058	rxn00269	fig|171101.1.peg.2058rxn00269	0.0730624
COMMON	fig|171101.1.peg.1375	rxn02320	fig|171101.1.peg.1375rxn02320	0.0152749		COMMON	fig|171101.1.peg.1375	rxn02320	fig|171101.1.peg.1375rxn02320	0.0152749
COMMON	fig|171101.1.peg.961	rxn00292	fig|171101.1.peg.961rxn00292	0.00492068		COMMON	fig|171101.1.peg.961	rxn00292	fig|171101.1.peg.961rxn00292	0.00492068
COMMON	fig|171101.1.peg.961	rxn00297	fig|171101.1.peg.961rxn00297	0.00492068		COMMON	fig|171101.1.peg.961	rxn00297	fig|171101.1.peg.961rxn00297	0.00492068
COMMON	fig|171101.1.peg.592	rxn05391	fig|171101.1.peg.592rxn05391	0.00646017		COMMON	fig|171101.1.peg.592	rxn05391	fig|171101.1.peg.592rxn05391	0.00646017
COMMON	fig|171101.1.peg.592	rxn05443	fig|171101.1.peg.592rxn05443	0.00953744		COMMON	fig|171101.1.peg.592	rxn05443	fig|171101.1.peg.592rxn05443	0.00953744
COMMON	fig|171101.1.peg.592	rxn05464	fig|171101.1.peg.592rxn05464	0.00953744		COMMON	fig|171101.1.peg.592	rxn05464	fig|171101.1.peg.592rxn05464	0.00953744
COMMON	fig|171101.1.peg.592	rxn05395	fig|171101.1.peg.592rxn05395	0.00646017		COMMON	fig|171101.1.peg.592	rxn05395	fig|171101.1.peg.592rxn05395	0.00646017
COMMON	fig|171101.1.peg.592	rxn05387	fig|171101.1.peg.592rxn05387	0.00646017		COMMON	fig|171101.1.peg.592	rxn05387	fig|171101.1.peg.592rxn05387	0.00646017
COMMON	fig|171101.1.peg.592	rxn05362	fig|171101.1.peg.592rxn05362	0.00646017		COMMON	fig|171101.1.peg.592	rxn05362	fig|171101.1.peg.592rxn05362	0.00646017
COMMON	fig|171101.1.peg.592	rxn05442	fig|171101.1.peg.592rxn05442	0.00953744		COMMON	fig|171101.1.peg.592	rxn05442	fig|171101.1.peg.592rxn05442	0.00953744
COMMON	fig|171101.1.peg.592	rxn05366	fig|171101.1.peg.592rxn05366	0.00646017		COMMON	fig|171101.1.peg.592	rxn05366	fig|171101.1.peg.592rxn05366	0.00646017
COMMON	fig|171101.1.peg.592	rxn05355	fig|171101.1.peg.592rxn05355	0.00646017		COMMON	fig|171101.1.peg.592	rxn05355	fig|171101.1.peg.592rxn05355	0.00646017
COMMON	fig|171101.1.peg.592	rxn05444	fig|171101.1.peg.592rxn05444	0.00953744		COMMON	fig|171101.1.peg.592	rxn05444	fig|171101.1.peg.592rxn05444	0.00953744
COMMON	fig|171101.1.peg.592	rxn05357	fig|171101.1.peg.592rxn05357	0.00646017		COMMON	fig|171101.1.peg.592	rxn05357	fig|171101.1.peg.592rxn05357	0.00646017
COMMON	fig|171101.1.peg.592	rxn05356	fig|171101.1.peg.592rxn05356	0.00646017		COMMON	fig|171101.1.peg.592	rxn05356	fig|171101.1.peg.592rxn05356	0.00646017
COMMON	fig|171101.1.peg.592	rxn05438	fig|171101.1.peg.592rxn05438	0.00953744		COMMON	fig|171101.1.peg.592	rxn05438	fig|171101.1.peg.592rxn05438	0.00953744
COMMON	fig|171101.1.peg.592	rxn05353	fig|171101.1.peg.592rxn05353	0.00646017		COMMON	fig|171101.1.peg.592	rxn05353	fig|171101.1.peg.592rxn05353	0.00646017
COMMON	fig|171101.1.peg.592	rxn05352	fig|171101.1.peg.592rxn05352	0.00646017		COMMON	fig|171101.1.peg.592	rxn05352	fig|171101.1.peg.592rxn05352	0.00646017
COMMON	fig|171101.1.peg.592	rxn05374	fig|171101.1.peg.592rxn05374	0.00646017		COMMON	fig|171101.1.peg.592	rxn05374	fig|171101.1.peg.592rxn05374	0.00646017
COMMON	fig|171101.1.peg.592	rxn05327	fig|171101.1.peg.592rxn05327	0.00953744		COMMON	fig|171101.1.peg.592	rxn05327	fig|171101.1.peg.592rxn05327	0.00953744
COMMON	fig|171101.1.peg.592	rxn05325	fig|171101.1.peg.592rxn05325	0.00953744		COMMON	fig|171101.1.peg.592	rxn05325	fig|171101.1.peg.592rxn05325	0.00953744
COMMON	fig|171101.1.peg.592	rxn05322	fig|171101.1.peg.592rxn05322	0.00953744		COMMON	fig|171101.1.peg.592	rxn05322	fig|171101.1.peg.592rxn05322	0.00953744
COMMON	fig|171101.1.peg.592	rxn05437	fig|171101.1.peg.592rxn05437	0.00953744		COMMON	fig|171101.1.peg.592	rxn05437	fig|171101.1.peg.592rxn05437	0.00953744
COMMON	fig|171101.1.peg.592	rxn05435	fig|171101.1.peg.592rxn05435	0.00953744		COMMON	fig|171101.1.peg.592	rxn05435	fig|171101.1.peg.592rxn05435	0.00953744
COMMON	fig|171101.1.peg.634	rxn01537	fig|171101.1.peg.634rxn01537	0.280994		COMMON	fig|171101.1.peg.634	rxn01537	fig|171101.1.peg.634rxn01537	0.280994
COMMON	fig|171101.1.peg.1968	rxn05644	fig|171101.1.peg.1968rxn05644	0.0524373		COMMON	fig|171101.1.peg.1968	rxn05644	fig|171101.1.peg.1968rxn05644	0.0524373
COMMON	fig|171101.1.peg.1529	rxn01275	fig|171101.1.peg.1529rxn01275	0.00856834		COMMON	fig|171101.1.peg.1529	rxn01275	fig|171101.1.peg.1529rxn01275	0.00856834
COMMON	fig|171101.1.peg.384	rxn05381	fig|171101.1.peg.384rxn05381	0.720964		COMMON	fig|171101.1.peg.384	rxn05381	fig|171101.1.peg.384rxn05381	0.720964
COMMON	fig|171101.1.peg.384	rxn05390	fig|171101.1.peg.384rxn05390	0.720964		COMMON	fig|171101.1.peg.384	rxn05390	fig|171101.1.peg.384rxn05390	0.720964
COMMON	fig|171101.1.peg.384	rxn05402	fig|171101.1.peg.384rxn05402	0.720964		COMMON	fig|171101.1.peg.384	rxn05402	fig|171101.1.peg.384rxn05402	0.720964
COMMON	fig|171101.1.peg.384	rxn05386	fig|171101.1.peg.384rxn05386	0.720964		COMMON	fig|171101.1.peg.384	rxn05386	fig|171101.1.peg.384rxn05386	0.720964
COMMON	fig|171101.1.peg.384	rxn05394	fig|171101.1.peg.384rxn05394	0.720964		COMMON	fig|171101.1.peg.384	rxn05394	fig|171101.1.peg.384rxn05394	0.720964
COMMON	fig|171101.1.peg.384	rxn05377	fig|171101.1.peg.384rxn05377	0.720964		COMMON	fig|171101.1.peg.384	rxn05377	fig|171101.1.peg.384rxn05377	0.720964
COMMON	fig|171101.1.peg.384	rxn05398	fig|171101.1.peg.384rxn05398	0.720964		COMMON	fig|171101.1.peg.384	rxn05398	fig|171101.1.peg.384rxn05398	0.720964
COMMON	fig|171101.1.peg.384	rxn05373	fig|171101.1.peg.384rxn05373	0.720964		COMMON	fig|171101.1.peg.384	rxn05373	fig|171101.1.peg.384rxn05373	0.720964
COMMON	fig|171101.1.peg.384	rxn05365	fig|171101.1.peg.384rxn05365	0.720964		COMMON	fig|171101.1.peg.384	rxn05365	fig|171101.1.peg.384rxn05365	0.720964
COMMON	fig|171101.1.peg.384	rxn05331	fig|171101.1.peg.384rxn05331	0.720964		COMMON	fig|171101.1.peg.384	rxn05331	fig|171101.1.peg.384rxn05331	0.720964
COMMON	fig|171101.1.peg.384	rxn05462	fig|171101.1.peg.384rxn05462	0.720964		COMMON	fig|171101.1.peg.384	rxn05462	fig|171101.1.peg.384rxn05462	0.720964
COMMON	fig|171101.1.peg.384	rxn05333	fig|171101.1.peg.384rxn05333	0.720964		COMMON	fig|171101.1.peg.384	rxn05333	fig|171101.1.peg.384rxn05333	0.720964
COMMON	fig|171101.1.peg.384	rxn05369	fig|171101.1.peg.384rxn05369	0.720964		COMMON	fig|171101.1.peg.384	rxn05369	fig|171101.1.peg.384rxn05369	0.720964
COMMON	fig|171101.1.peg.384	rxn05334	fig|171101.1.peg.384rxn05334	0.720964		COMMON	fig|171101.1.peg.384	rxn05334	fig|171101.1.peg.384rxn05334	0.720964
COMMON	fig|171101.1.peg.384	rxn05329	fig|171101.1.peg.384rxn05329	0.720964		COMMON	fig|171101.1.peg.384	rxn05329	fig|171101.1.peg.384rxn05329	0.720964
COMMON	fig|171101.1.peg.384	rxn05330	fig|171101.1.peg.384rxn05330	0.720964		COMMON	fig|171101.1.peg.384	rxn05330	fig|171101.1.peg.384rxn05330	0.720964
COMMON	fig|171101.1.peg.384	rxn05406	fig|171101.1.peg.384rxn05406	0.720964		COMMON	fig|171101.1.peg.384	rxn05406	fig|171101.1.peg.384rxn05406	0.720964
COMMON	fig|171101.1.peg.384	rxn05361	fig|171101.1.peg.384rxn05361	0.720964		COMMON	fig|171101.1.peg.384	rxn05361	fig|171101.1.peg.384rxn05361	0.720964
COMMON	fig|171101.1.peg.748	rxn05644	fig|171101.1.peg.748rxn05644	0.0673346		COMMON	fig|171101.1.peg.748	rxn05644	fig|171101.1.peg.748rxn05644	0.0673346
COMMON	fig|171101.1.peg.135	rxn10302	fig|171101.1.peg.135rxn10302	0.126689		COMMON	fig|171101.1.peg.135	rxn10302	fig|171101.1.peg.135rxn10302	0.126689
COMMON	fig|171101.1.peg.135	rxn10193	fig|171101.1.peg.135rxn10193	0.126689		COMMON	fig|171101.1.peg.135	rxn10193	fig|171101.1.peg.135rxn10193	0.126689
COMMON	fig|171101.1.peg.135	rxn10300	fig|171101.1.peg.135rxn10300	0.126689		COMMON	fig|171101.1.peg.135	rxn10300	fig|171101.1.peg.135rxn10300	0.126689
COMMON	fig|171101.1.peg.135	rxn10301	fig|171101.1.peg.135rxn10301	0.126689		COMMON	fig|171101.1.peg.135	rxn10301	fig|171101.1.peg.135rxn10301	0.126689
COMMON	fig|171101.1.peg.887	rxn03150	fig|171101.1.peg.887rxn03150	0.0498841		COMMON	fig|171101.1.peg.887	rxn03150	fig|171101.1.peg.887rxn03150	0.0498841
COMMON	fig|171101.1.peg.1723	rxn03886	fig|171101.1.peg.1723rxn03886	0.00441636		COMMON	fig|171101.1.peg.1723	rxn03886	fig|171101.1.peg.1723rxn03886	0.00441636
COMMON	fig|171101.1.peg.1402	rxn03167	fig|171101.1.peg.1402rxn03167	0.000104237		COMMON	fig|171101.1.peg.1402	rxn03167	fig|171101.1.peg.1402rxn03167	0.000104237
COMMON	fig|208964.1.peg.3645	rxn05381	fig|208964.1.peg.3645rxn05381	0.726151		COMMON	fig|208964.1.peg.3645	rxn05381	fig|208964.1.peg.3645rxn05381	0.726151
COMMON	fig|208964.1.peg.3645	rxn05390	fig|208964.1.peg.3645rxn05390	0.726151		COMMON	fig|208964.1.peg.3645	rxn05390	fig|208964.1.peg.3645rxn05390	0.726151
COMMON	fig|208964.1.peg.3645	rxn05402	fig|208964.1.peg.3645rxn05402	0.726151		COMMON	fig|208964.1.peg.3645	rxn05402	fig|208964.1.peg.3645rxn05402	0.726151
COMMON	fig|208964.1.peg.3645	rxn05386	fig|208964.1.peg.3645rxn05386	0.726151		COMMON	fig|208964.1.peg.3645	rxn05386	fig|208964.1.peg.3645rxn05386	0.726151
COMMON	fig|208964.1.peg.3645	rxn05394	fig|208964.1.peg.3645rxn05394	0.726151		COMMON	fig|208964.1.peg.3645	rxn05394	fig|208964.1.peg.3645rxn05394	0.726151
COMMON	fig|208964.1.peg.3645	rxn05377	fig|208964.1.peg.3645rxn05377	0.726151		COMMON	fig|208964.1.peg.3645	rxn05377	fig|208964.1.peg.3645rxn05377	0.726151
COMMON	fig|208964.1.peg.3645	rxn05398	fig|208964.1.peg.3645rxn05398	0.726151		COMMON	fig|208964.1.peg.3645	rxn05398	fig|208964.1.peg.3645rxn05398	0.726151
COMMON	fig|208964.1.peg.3645	rxn05373	fig|208964.1.peg.3645rxn05373	0.726151		COMMON	fig|208964.1.peg.3645	rxn05373	fig|208964.1.peg.3645rxn05373	0.726151
COMMON	fig|208964.1.peg.3645	rxn05369	fig|208964.1.peg.3645rxn05369	0.726151		COMMON	fig|208964.1.peg.3645	rxn05369	fig|208964.1.peg.3645rxn05369	0.726151
COMMON	fig|208964.1.peg.3645	rxn05462	fig|208964.1.peg.3645rxn05462	0.726151		COMMON	fig|208964.1.peg.3645	rxn05462	fig|208964.1.peg.3645rxn05462	0.726151
COMMON	fig|208964.1.peg.3645	rxn05406	fig|208964.1.peg.3645rxn05406	0.726151		COMMON	fig|208964.1.peg.3645	rxn05406	fig|208964.1.peg.3645rxn05406	0.726151
COMMON	fig|208964.1.peg.3645	rxn05365	fig|208964.1.peg.3645rxn05365	0.726151		COMMON	fig|208964.1.peg.3645	rxn05365	fig|208964.1.peg.3645rxn05365	0.726151
COMMON	fig|208964.1.peg.3645	rxn05361	fig|208964.1.peg.3645rxn05361	0.726151		COMMON	fig|208964.1.peg.3645	rxn05361	fig|208964.1.peg.3645rxn05361	0.726151
COMMON	fig|208964.1.peg.1011	rxn01644	fig|208964.1.peg.1011rxn01644	0.0101375		COMMON	fig|208964.1.peg.1011	rxn01644	fig|208964.1.peg.1011rxn01644	0.0101375
COMMON	fig|208964.1.peg.1011	rxn01634	fig|208964.1.peg.1011rxn01634	0.150278		COMMON	fig|208964.1.peg.1011	rxn01634	fig|208964.1.peg.1011rxn01634	0.150278
COMMON	fig|208964.1.peg.4231	rxn01258	fig|208964.1.peg.4231rxn01258	0.698388		COMMON	fig|208964.1.peg.4231	rxn01258	fig|208964.1.peg.4231rxn01258	0.698388
COMMON	fig|208964.1.peg.2517	rxn03898	fig|208964.1.peg.2517rxn03898	0.783956		COMMON	fig|208964.1.peg.2517	rxn03898	fig|208964.1.peg.2517rxn03898	0.783956
COMMON	fig|208964.1.peg.4189	rxn01438	fig|208964.1.peg.4189rxn01438	0.0106052		COMMON	fig|208964.1.peg.4189	rxn01438	fig|208964.1.peg.4189rxn01438	0.0106052
COMMON	fig|208964.1.peg.1276	rxn04384	fig|208964.1.peg.1276rxn04384	0.770821		COMMON	fig|208964.1.peg.1276	rxn04384	fig|208964.1.peg.1276rxn04384	0.770821
COMMON	fig|208964.1.peg.5060	rxn03397	fig|208964.1.peg.5060rxn03397	0.840994		COMMON	fig|208964.1.peg.5060	rxn03397	fig|208964.1.peg.5060rxn03397	0.840994
COMMON	fig|208964.1.peg.5060	rxn10094	fig|208964.1.peg.5060rxn10094	0.840994		COMMON	fig|208964.1.peg.5060	rxn10094	fig|208964.1.peg.5060rxn10094	0.840994
COMMON	fig|208964.1.peg.4344	rxn01972	fig|208964.1.peg.4344rxn01972	0.756471		COMMON	fig|208964.1.peg.4344	rxn01972	fig|208964.1.peg.4344rxn01972	0.756471
COMMON	fig|208964.1.peg.5091	rxn05181	fig|208964.1.peg.5091rxn05181	0.496663		COMMON	fig|208964.1.peg.5091	rxn05181	fig|208964.1.peg.5091rxn05181	0.496663
COMMON	fig|208964.1.peg.2009	rxn01825	fig|208964.1.peg.2009rxn01825	0.986444		COMMON	fig|208964.1.peg.2009	rxn01825	fig|208964.1.peg.2009rxn01825	0.986444
COMMON	fig|208964.1.peg.2008	rxn00993	fig|208964.1.peg.2008rxn00993	0.987278		COMMON	fig|208964.1.peg.2008	rxn00993	fig|208964.1.peg.2008rxn00993	0.987278
COMMON	fig|208964.1.peg.2890	rxn02898	fig|208964.1.peg.2890rxn02898	0.00498092		COMMON	fig|208964.1.peg.2890	rxn02898	fig|208964.1.peg.2890rxn02898	0.00498092
COMMON	fig|208964.1.peg.4127	rxn01203	fig|208964.1.peg.4127rxn01203	0.575901		COMMON	fig|208964.1.peg.4127	rxn01203	fig|208964.1.peg.4127rxn01203	0.575901
COMMON	fig|208964.1.peg.5373	rxn05181	fig|208964.1.peg.5373rxn05181	0.565117		COMMON	fig|208964.1.peg.5373	rxn05181	fig|208964.1.peg.5373rxn05181	0.565117
COMMON	fig|208964.1.peg.3923	rxn02831	fig|208964.1.peg.3923rxn02831	0.0642044		COMMON	fig|208964.1.peg.3923	rxn02831	fig|208964.1.peg.3923rxn02831	0.0642044
COMMON	fig|208964.1.peg.5238	rxn02449	fig|208964.1.peg.5238rxn02449	0.132411		COMMON	fig|208964.1.peg.5238	rxn02449	fig|208964.1.peg.5238rxn02449	0.132411
COMMON	fig|208964.1.peg.1091	rxn00751	fig|208964.1.peg.1091rxn00751	0.0157177		COMMON	fig|208964.1.peg.1091	rxn00751	fig|208964.1.peg.1091rxn00751	0.0157177
COMMON	fig|208964.1.peg.182	rxn05416	fig|208964.1.peg.182rxn05416	0.505365		COMMON	fig|208964.1.peg.182	rxn05416	fig|208964.1.peg.182rxn05416	0.505365
COMMON	fig|208964.1.peg.182	rxn05412	fig|208964.1.peg.182rxn05412	0.505365		COMMON	fig|208964.1.peg.182	rxn05412	fig|208964.1.peg.182rxn05412	0.505365
COMMON	fig|208964.1.peg.182	rxn05428	fig|208964.1.peg.182rxn05428	0.505365		COMMON	fig|208964.1.peg.182	rxn05428	fig|208964.1.peg.182rxn05428	0.505365
COMMON	fig|208964.1.peg.182	rxn05432	fig|208964.1.peg.182rxn05432	0.505365		COMMON	fig|208964.1.peg.182	rxn05432	fig|208964.1.peg.182rxn05432	0.505365
COMMON	fig|208964.1.peg.182	rxn05424	fig|208964.1.peg.182rxn05424	0.505365		COMMON	fig|208964.1.peg.182	rxn05424	fig|208964.1.peg.182rxn05424	0.505365
COMMON	fig|208964.1.peg.182	rxn05420	fig|208964.1.peg.182rxn05420	0.505365		COMMON	fig|208964.1.peg.182	rxn05420	fig|208964.1.peg.182rxn05420	0.505365
COMMON	fig|208964.1.peg.2022	rxn00211	fig|208964.1.peg.2022rxn00211	0.886937		COMMON	fig|208964.1.peg.2022	rxn00211	fig|208964.1.peg.2022rxn00211	0.886937
COMMON	fig|208964.1.peg.3690	rxn05516	fig|208964.1.peg.3690rxn05516	0.792563		COMMON	fig|208964.1.peg.3690	rxn05516	fig|208964.1.peg.3690rxn05516	0.792563
COMMON	fig|208964.1.peg.3796	rxn03869	fig|208964.1.peg.3796rxn03869	0.00974717		COMMON	fig|208964.1.peg.3796	rxn03869	fig|208964.1.peg.3796rxn03869	0.00974717
COMMON	fig|208964.1.peg.3796	rxn03839	fig|208964.1.peg.3796rxn03839	0.00974717		COMMON	fig|208964.1.peg.3796	rxn03839	fig|208964.1.peg.3796rxn03839	0.00974717
COMMON	fig|208964.1.peg.1278	rxn03540	fig|208964.1.peg.1278rxn03540	0.740715		COMMON	fig|208964.1.peg.1278	rxn03540	fig|208964.1.peg.1278rxn03540	0.740715
COMMON	fig|208964.1.peg.148	rxn01858	fig|208964.1.peg.148rxn01858	0.991748		COMMON	fig|208964.1.peg.148	rxn01858	fig|208964.1.peg.148rxn01858	0.991748
COMMON	fig|208964.1.peg.521	rxn10476	fig|208964.1.peg.521rxn10476	0.000627472		COMMON	fig|208964.1.peg.521	rxn10476	fig|208964.1.peg.521rxn10476	0.000627472
COMMON	fig|208964.1.peg.3559	rxn00211	fig|208964.1.peg.3559rxn00211	0.881097		COMMON	fig|208964.1.peg.3559	rxn00211	fig|208964.1.peg.3559rxn00211	0.881097
COMMON	fig|208964.1.peg.117	rxn03886	fig|208964.1.peg.117rxn03886	0.0373391		COMMON	fig|208964.1.peg.117	rxn03886	fig|208964.1.peg.117rxn03886	0.0373391
COMMON	fig|208964.1.peg.3159	rxn00211	fig|208964.1.peg.3159rxn00211	0.855089		COMMON	fig|208964.1.peg.3159	rxn00211	fig|208964.1.peg.3159rxn00211	0.855089
COMMON	fig|208964.1.peg.2555	rxn00986	fig|208964.1.peg.2555rxn00986	0.97391		COMMON	fig|208964.1.peg.2555	rxn00986	fig|208964.1.peg.2555rxn00986	0.97391
COMMON	fig|208964.1.peg.3136	rxn03075	fig|208964.1.peg.3136rxn03075	0.000975759		COMMON	fig|208964.1.peg.3136	rxn03075	fig|208964.1.peg.3136rxn03075	0.000975759
COMMON	fig|208964.1.peg.5618	rxn00022	fig|208964.1.peg.5618rxn00022	0.339426		COMMON	fig|208964.1.peg.5618	rxn00022	fig|208964.1.peg.5618rxn00022	0.339426
COMMON	fig|208964.1.peg.5618	rxn08935	fig|208964.1.peg.5618rxn08935	0.339426		COMMON	fig|208964.1.peg.5618	rxn08935	fig|208964.1.peg.5618rxn08935	0.339426
COMMON	fig|208964.1.peg.5618	rxn08936	fig|208964.1.peg.5618rxn08936	0.339426		COMMON	fig|208964.1.peg.5618	rxn08936	fig|208964.1.peg.5618rxn08936	0.339426
COMMON	fig|208964.1.peg.5618	rxn08933	fig|208964.1.peg.5618rxn08933	0.339426		COMMON	fig|208964.1.peg.5618	rxn08933	fig|208964.1.peg.5618rxn08933	0.339426
COMMON	fig|208964.1.peg.3156	rxn03030	fig|208964.1.peg.3156rxn03030	0.883124		COMMON	fig|208964.1.peg.3156	rxn03030	fig|208964.1.peg.3156rxn03030	0.883124
COMMON	fig|208964.1.peg.2914	rxn05515	fig|208964.1.peg.2914rxn05515	0.280713		COMMON	fig|208964.1.peg.2914	rxn05515	fig|208964.1.peg.2914rxn05515	0.280713
COMMON	fig|208964.1.peg.2914	rxn10147	fig|208964.1.peg.2914rxn10147	0.280713		COMMON	fig|208964.1.peg.2914	rxn10147	fig|208964.1.peg.2914rxn10147	0.280713
COMMON	fig|208964.1.peg.1282	rxn03538	fig|208964.1.peg.1282rxn03538	0.890963		COMMON	fig|208964.1.peg.1282	rxn03538	fig|208964.1.peg.1282rxn03538	0.890963
COMMON	fig|208964.1.peg.225	rxn01620	fig|208964.1.peg.225rxn01620	0.269314		COMMON	fig|208964.1.peg.225	rxn01620	fig|208964.1.peg.225rxn01620	0.269314
COMMON	fig|208964.1.peg.1824	rxn00076	fig|208964.1.peg.1824rxn00076	0.980448		COMMON	fig|208964.1.peg.1824	rxn00076	fig|208964.1.peg.1824rxn00076	0.980448
COMMON	fig|208964.1.peg.3654	rxn00119	fig|208964.1.peg.3654rxn00119	0.974301		COMMON	fig|208964.1.peg.3654	rxn00119	fig|208964.1.peg.3654rxn00119	0.974301
COMMON	fig|208964.1.peg.2922	rxn01972	fig|208964.1.peg.2922rxn01972	0.760602		COMMON	fig|208964.1.peg.2922	rxn01972	fig|208964.1.peg.2922rxn01972	0.760602
COMMON	fig|208964.1.peg.598	rxn00641	fig|208964.1.peg.598rxn00641	0.168588		COMMON	fig|208964.1.peg.598	rxn00641	fig|208964.1.peg.598rxn00641	0.168588
COMMON	fig|208964.1.peg.2512	rxn03898	fig|208964.1.peg.2512rxn03898	0.75314		COMMON	fig|208964.1.peg.2512	rxn03898	fig|208964.1.peg.2512rxn03898	0.75314
COMMON	fig|208964.1.peg.2912	rxn05515	fig|208964.1.peg.2912rxn05515	0.331653		COMMON	fig|208964.1.peg.2912	rxn05515	fig|208964.1.peg.2912rxn05515	0.331653
COMMON	fig|208964.1.peg.2912	rxn10147	fig|208964.1.peg.2912rxn10147	0.331653		COMMON	fig|208964.1.peg.2912	rxn10147	fig|208964.1.peg.2912rxn10147	0.331653
COMMON	fig|208964.1.peg.1749	rxn02898	fig|208964.1.peg.1749rxn02898	0.0061034		COMMON	fig|208964.1.peg.1749	rxn02898	fig|208964.1.peg.1749rxn02898	0.0061034
COMMON	fig|208964.1.peg.2518	rxn03898	fig|208964.1.peg.2518rxn03898	0.831418		COMMON	fig|208964.1.peg.2518	rxn03898	fig|208964.1.peg.2518rxn03898	0.831418
COMMON	fig|208964.1.peg.1232	rxn03075	fig|208964.1.peg.1232rxn03075	0.000906951		COMMON	fig|208964.1.peg.1232	rxn03075	fig|208964.1.peg.1232rxn03075	0.000906951
COMMON	fig|208964.1.peg.1274	rxn06979	fig|208964.1.peg.1274rxn06979	0.990786		COMMON	fig|208964.1.peg.1274	rxn06979	fig|208964.1.peg.1274rxn06979	0.990786
COMMON	fig|208964.1.peg.1274	rxn11544	fig|208964.1.peg.1274rxn11544	0.990786		COMMON	fig|208964.1.peg.1274	rxn11544	fig|208964.1.peg.1274rxn11544	0.990786
COMMON	fig|208964.1.peg.4757	rxn02929	fig|208964.1.peg.4757rxn02929	0.403403		COMMON	fig|208964.1.peg.4757	rxn02929	fig|208964.1.peg.4757rxn02929	0.403403
COMMON	fig|208964.1.peg.3919	rxn05528	fig|208964.1.peg.3919rxn05528	0.922949		COMMON	fig|208964.1.peg.3919	rxn05528	fig|208964.1.peg.3919rxn05528	0.922949
COMMON	fig|208964.1.peg.3919	rxn05516	fig|208964.1.peg.3919rxn05516	0.889976		COMMON	fig|208964.1.peg.3919	rxn05516	fig|208964.1.peg.3919rxn05516	0.889976
COMMON	fig|208964.1.peg.1256	rxn00933	fig|208964.1.peg.1256rxn00933	0.182414		COMMON	fig|208964.1.peg.1256	rxn00933	fig|208964.1.peg.1256rxn00933	0.182414
COMMON	fig|208964.1.peg.5445	rxn08713	fig|208964.1.peg.5445rxn08713	0.0697906		COMMON	fig|208964.1.peg.5445	rxn08713	fig|208964.1.peg.5445rxn08713	0.0697906
COMMON	fig|208964.1.peg.2215	rxn02832	fig|208964.1.peg.2215rxn02832	0.0201267		COMMON	fig|208964.1.peg.2215	rxn02832	fig|208964.1.peg.2215rxn02832	0.0201267
COMMON	fig|208964.1.peg.1517	rxn01523	fig|208964.1.peg.1517rxn01523	0.000750334		COMMON	fig|208964.1.peg.1517	rxn01523	fig|208964.1.peg.1517rxn01523	0.000750334
COMMON	fig|208964.1.peg.3908	rxn02400	fig|208964.1.peg.3908rxn02400	0.252292		COMMON	fig|208964.1.peg.3908	rxn02400	fig|208964.1.peg.3908rxn02400	0.252292
COMMON	fig|208964.1.peg.2239	rxn08713	fig|208964.1.peg.2239rxn08713	0.0650669		COMMON	fig|208964.1.peg.2239	rxn08713	fig|208964.1.peg.2239rxn08713	0.0650669
COMMON	fig|208964.1.peg.2803	rxn00537	fig|208964.1.peg.2803rxn00537	0.807143		COMMON	fig|208964.1.peg.2803	rxn00537	fig|208964.1.peg.2803rxn00537	0.807143
COMMON	fig|208964.1.peg.3328	rxn00589	fig|208964.1.peg.3328rxn00589	0.691023		COMMON	fig|208964.1.peg.3328	rxn00589	fig|208964.1.peg.3328rxn00589	0.691023
COMMON	fig|208964.1.peg.2909	rxn03492	fig|208964.1.peg.2909rxn03492	0.969784		COMMON	fig|208964.1.peg.2909	rxn03492	fig|208964.1.peg.2909rxn03492	0.969784
COMMON	fig|208964.1.peg.2909	rxn04050	fig|208964.1.peg.2909rxn04050	0.969784		COMMON	fig|208964.1.peg.2909	rxn04050	fig|208964.1.peg.2909rxn04050	0.969784
COMMON	fig|208964.1.peg.3023	rxn00748	fig|208964.1.peg.3023rxn00748	0.562592		COMMON	fig|208964.1.peg.3023	rxn00748	fig|208964.1.peg.3023rxn00748	0.562592
COMMON	fig|208964.1.peg.3004	rxn01022	fig|208964.1.peg.3004rxn01022	0.946296		COMMON	fig|208964.1.peg.3004	rxn01022	fig|208964.1.peg.3004rxn01022	0.946296
COMMON	fig|208964.1.peg.4656	rxn02304	fig|208964.1.peg.4656rxn02304	0.00279031		COMMON	fig|208964.1.peg.4656	rxn02304	fig|208964.1.peg.4656rxn02304	0.00279031
COMMON	fig|208964.1.peg.4096	rxn03856	fig|208964.1.peg.4096rxn03856	0.0630953		COMMON	fig|208964.1.peg.4096	rxn03856	fig|208964.1.peg.4096rxn03856	0.0630953
COMMON	fig|208964.1.peg.4096	rxn03954	fig|208964.1.peg.4096rxn03954	0.103751		COMMON	fig|208964.1.peg.4096	rxn03954	fig|208964.1.peg.4096rxn03954	0.103751
COMMON	fig|208964.1.peg.2907	rxn03491	fig|208964.1.peg.2907rxn03491	0.975281		COMMON	fig|208964.1.peg.2907	rxn03491	fig|208964.1.peg.2907rxn03491	0.975281
COMMON	fig|208964.1.peg.4970	rxn09997	fig|208964.1.peg.4970rxn09997	0.735412		COMMON	fig|208964.1.peg.4970	rxn09997	fig|208964.1.peg.4970rxn09997	0.735412
COMMON	fig|224308.1.peg.3644	rxn05381	fig|224308.1.peg.3644rxn05381	0.7655		COMMON	fig|224308.1.peg.3644	rxn05381	fig|224308.1.peg.3644rxn05381	0.7655
COMMON	fig|224308.1.peg.3644	rxn05390	fig|224308.1.peg.3644rxn05390	0.7655		COMMON	fig|224308.1.peg.3644	rxn05390	fig|224308.1.peg.3644rxn05390	0.7655
COMMON	fig|224308.1.peg.3644	rxn05402	fig|224308.1.peg.3644rxn05402	0.7655		COMMON	fig|224308.1.peg.3644	rxn05402	fig|224308.1.peg.3644rxn05402	0.7655
COMMON	fig|224308.1.peg.3644	rxn05386	fig|224308.1.peg.3644rxn05386	0.7655		COMMON	fig|224308.1.peg.3644	rxn05386	fig|224308.1.peg.3644rxn05386	0.7655
COMMON	fig|224308.1.peg.3644	rxn05394	fig|224308.1.peg.3644rxn05394	0.7655		COMMON	fig|224308.1.peg.3644	rxn05394	fig|224308.1.peg.3644rxn05394	0.7655
COMMON	fig|224308.1.peg.3644	rxn05377	fig|224308.1.peg.3644rxn05377	0.7655		COMMON	fig|224308.1.peg.3644	rxn05377	fig|224308.1.peg.3644rxn05377	0.7655
COMMON	fig|224308.1.peg.3644	rxn05398	fig|224308.1.peg.3644rxn05398	0.7655		COMMON	fig|224308.1.peg.3644	rxn05398	fig|224308.1.peg.3644rxn05398	0.7655
COMMON	fig|224308.1.peg.3644	rxn05332	fig|224308.1.peg.3644rxn05332	0.7655		COMMON	fig|224308.1.peg.3644	rxn05332	fig|224308.1.peg.3644rxn05332	0.7655
COMMON	fig|224308.1.peg.3644	rxn05373	fig|224308.1.peg.3644rxn05373	0.7655		COMMON	fig|224308.1.peg.3644	rxn05373	fig|224308.1.peg.3644rxn05373	0.7655
COMMON	fig|224308.1.peg.3644	rxn05365	fig|224308.1.peg.3644rxn05365	0.7655		COMMON	fig|224308.1.peg.3644	rxn05365	fig|224308.1.peg.3644rxn05365	0.7655
COMMON	fig|224308.1.peg.3644	rxn05331	fig|224308.1.peg.3644rxn05331	0.7655		COMMON	fig|224308.1.peg.3644	rxn05331	fig|224308.1.peg.3644rxn05331	0.7655
COMMON	fig|224308.1.peg.3644	rxn05462	fig|224308.1.peg.3644rxn05462	0.7655		COMMON	fig|224308.1.peg.3644	rxn05462	fig|224308.1.peg.3644rxn05462	0.7655
COMMON	fig|224308.1.peg.3644	rxn05369	fig|224308.1.peg.3644rxn05369	0.7655		COMMON	fig|224308.1.peg.3644	rxn05369	fig|224308.1.peg.3644rxn05369	0.7655
COMMON	fig|224308.1.peg.3644	rxn05335	fig|224308.1.peg.3644rxn05335	0.7655		COMMON	fig|224308.1.peg.3644	rxn05335	fig|224308.1.peg.3644rxn05335	0.7655
COMMON	fig|224308.1.peg.3644	rxn05334	fig|224308.1.peg.3644rxn05334	0.7655		COMMON	fig|224308.1.peg.3644	rxn05334	fig|224308.1.peg.3644rxn05334	0.7655
COMMON	fig|224308.1.peg.3644	rxn05329	fig|224308.1.peg.3644rxn05329	0.7655		COMMON	fig|224308.1.peg.3644	rxn05329	fig|224308.1.peg.3644rxn05329	0.7655
COMMON	fig|224308.1.peg.3644	rxn05330	fig|224308.1.peg.3644rxn05330	0.7655		COMMON	fig|224308.1.peg.3644	rxn05330	fig|224308.1.peg.3644rxn05330	0.7655
COMMON	fig|224308.1.peg.3644	rxn05406	fig|224308.1.peg.3644rxn05406	0.7655		COMMON	fig|224308.1.peg.3644	rxn05406	fig|224308.1.peg.3644rxn05406	0.7655
COMMON	fig|224308.1.peg.3644	rxn05361	fig|224308.1.peg.3644rxn05361	0.7655		COMMON	fig|224308.1.peg.3644	rxn05361	fig|224308.1.peg.3644rxn05361	0.7655
COMMON	fig|224308.1.peg.1561	rxn00379	fig|224308.1.peg.1561rxn00379	0.979672		COMMON	fig|224308.1.peg.1561	rxn00379	fig|224308.1.peg.1561rxn00379	0.979672
COMMON	fig|224308.1.peg.2534	rxn08299	fig|224308.1.peg.2534rxn08299	0.962482		COMMON	fig|224308.1.peg.2534	rxn08299	fig|224308.1.peg.2534rxn08299	0.962482
COMMON	fig|224308.1.peg.1564	rxn02056	fig|224308.1.peg.1564rxn02056	0.528669		COMMON	fig|224308.1.peg.1564	rxn02056	fig|224308.1.peg.1564rxn02056	0.528669
COMMON	fig|224308.1.peg.3187	rxn03886	fig|224308.1.peg.3187rxn03886	0.0301067		COMMON	fig|224308.1.peg.3187	rxn03886	fig|224308.1.peg.3187rxn03886	0.0301067
COMMON	fig|224308.1.peg.1034	rxn03150	fig|224308.1.peg.1034rxn03150	0.11825		COMMON	fig|224308.1.peg.1034	rxn03150	fig|224308.1.peg.1034rxn03150	0.11825
COMMON	fig|224308.1.peg.1240	rxn01122	fig|224308.1.peg.1240rxn01122	0.685848		COMMON	fig|224308.1.peg.1240	rxn01122	fig|224308.1.peg.1240rxn01122	0.685848
COMMON	fig|224308.1.peg.1075	rxn03041	fig|224308.1.peg.1075rxn03041	0.0497292		COMMON	fig|224308.1.peg.1075	rxn03041	fig|224308.1.peg.1075rxn03041	0.0497292
COMMON	fig|224308.1.peg.1075	rxn03040	fig|224308.1.peg.1075rxn03040	0.0248412		COMMON	fig|224308.1.peg.1075	rxn03040	fig|224308.1.peg.1075rxn03040	0.0248412
COMMON	fig|224308.1.peg.317	rxn03397	fig|224308.1.peg.317rxn03397	0.721513		COMMON	fig|224308.1.peg.317	rxn03397	fig|224308.1.peg.317rxn03397	0.721513
COMMON	fig|224308.1.peg.317	rxn10094	fig|224308.1.peg.317rxn10094	0.721513		COMMON	fig|224308.1.peg.317	rxn10094	fig|224308.1.peg.317rxn10094	0.721513
COMMON	fig|224308.1.peg.2253	rxn02929	fig|224308.1.peg.2253rxn02929	0.250964		COMMON	fig|224308.1.peg.2253	rxn02929	fig|224308.1.peg.2253rxn02929	0.250964
COMMON	fig|224308.1.peg.1359	rxn01630	fig|224308.1.peg.1359rxn01630	0.0679827		COMMON	fig|224308.1.peg.1359	rxn01630	fig|224308.1.peg.1359rxn01630	0.0679827
COMMON	fig|224308.1.peg.1359	rxn02222	fig|224308.1.peg.1359rxn02222	0.011949		COMMON	fig|224308.1.peg.1359	rxn02222	fig|224308.1.peg.1359rxn02222	0.011949
COMMON	fig|224308.1.peg.1050	rxn04139	fig|224308.1.peg.1050rxn04139	0.123409		COMMON	fig|224308.1.peg.1050	rxn04139	fig|224308.1.peg.1050rxn04139	0.123409
COMMON	fig|224308.1.peg.1050	rxn12224	fig|224308.1.peg.1050rxn12224	0.141165		COMMON	fig|224308.1.peg.1050	rxn12224	fig|224308.1.peg.1050rxn12224	0.141165
COMMON	fig|224308.1.peg.3084	rxn11703	fig|224308.1.peg.3084rxn11703	0.885844		COMMON	fig|224308.1.peg.3084	rxn11703	fig|224308.1.peg.3084rxn11703	0.885844
COMMON	fig|224308.1.peg.1711	rxn01274	fig|224308.1.peg.1711rxn01274	0.837663		COMMON	fig|224308.1.peg.1711	rxn01274	fig|224308.1.peg.1711rxn01274	0.837663
COMMON	fig|224308.1.peg.347	rxn03643	fig|224308.1.peg.347rxn03643	0.630017		COMMON	fig|224308.1.peg.347	rxn03643	fig|224308.1.peg.347rxn03643	0.630017
COMMON	fig|224308.1.peg.3206	rxn01094	fig|224308.1.peg.3206rxn01094	0.0430508		COMMON	fig|224308.1.peg.3206	rxn01094	fig|224308.1.peg.3206rxn01094	0.0430508
COMMON	fig|224308.1.peg.2279	rxn03397	fig|224308.1.peg.2279rxn03397	0.679206		COMMON	fig|224308.1.peg.2279	rxn03397	fig|224308.1.peg.2279rxn03397	0.679206
COMMON	fig|224308.1.peg.2279	rxn10094	fig|224308.1.peg.2279rxn10094	0.679206		COMMON	fig|224308.1.peg.2279	rxn10094	fig|224308.1.peg.2279rxn10094	0.679206
COMMON	fig|224308.1.peg.1092	rxn00379	fig|224308.1.peg.1092rxn00379	0.979971		COMMON	fig|224308.1.peg.1092	rxn00379	fig|224308.1.peg.1092rxn00379	0.979971
COMMON	fig|224308.1.peg.726	rxn00756	fig|224308.1.peg.726rxn00756	1.70897e-05		COMMON	fig|224308.1.peg.726	rxn00756	fig|224308.1.peg.726rxn00756	1.70897e-05
COMMON	fig|224308.1.peg.878	rxn09997	fig|224308.1.peg.878rxn09997	0.727418		COMMON	fig|224308.1.peg.878	rxn09997	fig|224308.1.peg.878rxn09997	0.727418
COMMON	fig|224308.1.peg.925	rxn01630	fig|224308.1.peg.925rxn01630	0.0740184		COMMON	fig|224308.1.peg.925	rxn01630	fig|224308.1.peg.925rxn01630	0.0740184
COMMON	fig|224308.1.peg.926	rxn00656	fig|224308.1.peg.926rxn00656	0.320311		COMMON	fig|224308.1.peg.926	rxn00656	fig|224308.1.peg.926rxn00656	0.320311
COMMON	fig|224308.1.peg.1680	rxn01322	fig|224308.1.peg.1680rxn01322	0.313964		COMMON	fig|224308.1.peg.1680	rxn01322	fig|224308.1.peg.1680rxn01322	0.313964
COMMON	fig|224308.1.peg.1680	rxn01644	fig|224308.1.peg.1680rxn01644	0.0299058		COMMON	fig|224308.1.peg.1680	rxn01644	fig|224308.1.peg.1680rxn01644	0.0299058
COMMON	fig|224308.1.peg.3660	rxn09106	fig|224308.1.peg.3660rxn09106	0.750039		COMMON	fig|224308.1.peg.3660	rxn09106	fig|224308.1.peg.3660rxn09106	0.750039
COMMON	fig|224308.1.peg.3660	rxn09107	fig|224308.1.peg.3660rxn09107	0.750039		COMMON	fig|224308.1.peg.3660	rxn09107	fig|224308.1.peg.3660rxn09107	0.750039
COMMON	fig|224308.1.peg.3660	rxn09104	fig|224308.1.peg.3660rxn09104	0.750039		COMMON	fig|224308.1.peg.3660	rxn09104	fig|224308.1.peg.3660rxn09104	0.750039
COMMON	fig|224308.1.peg.3660	rxn09105	fig|224308.1.peg.3660rxn09105	0.750039		COMMON	fig|224308.1.peg.3660	rxn09105	fig|224308.1.peg.3660rxn09105	0.750039
COMMON	fig|224308.1.peg.3660	rxn09102	fig|224308.1.peg.3660rxn09102	0.750039		COMMON	fig|224308.1.peg.3660	rxn09102	fig|224308.1.peg.3660rxn09102	0.750039
COMMON	fig|224308.1.peg.3660	rxn09103	fig|224308.1.peg.3660rxn09103	0.750039		COMMON	fig|224308.1.peg.3660	rxn09103	fig|224308.1.peg.3660rxn09103	0.750039
COMMON	fig|224308.1.peg.3660	rxn09101	fig|224308.1.peg.3660rxn09101	0.750039		COMMON	fig|224308.1.peg.3660	rxn09101	fig|224308.1.peg.3660rxn09101	0.750039
COMMON	fig|224308.1.peg.3660	rxn10265	fig|224308.1.peg.3660rxn10265	0.750039		COMMON	fig|224308.1.peg.3660	rxn10265	fig|224308.1.peg.3660rxn10265	0.750039
COMMON	fig|224308.1.peg.3660	rxn10266	fig|224308.1.peg.3660rxn10266	0.750039		COMMON	fig|224308.1.peg.3660	rxn10266	fig|224308.1.peg.3660rxn10266	0.750039
COMMON	fig|224308.1.peg.2653	rxn01274	fig|224308.1.peg.2653rxn01274	0.743251		COMMON	fig|224308.1.peg.2653	rxn01274	fig|224308.1.peg.2653rxn01274	0.743251
COMMON	fig|224308.1.peg.27	rxn00322	fig|224308.1.peg.27rxn00322	0.655193		COMMON	fig|224308.1.peg.27	rxn00322	fig|224308.1.peg.27rxn00322	0.655193
COMMON	fig|224308.1.peg.1234	rxn03856	fig|224308.1.peg.1234rxn03856	0.0688142		COMMON	fig|224308.1.peg.1234	rxn03856	fig|224308.1.peg.1234rxn03856	0.0688142
COMMON	fig|224308.1.peg.3452	rxn01737	fig|224308.1.peg.3452rxn01737	0.177663		COMMON	fig|224308.1.peg.3452	rxn01737	fig|224308.1.peg.3452rxn01737	0.177663
COMMON	fig|224308.1.peg.3174	rxn12008	fig|224308.1.peg.3174rxn12008	0.305015		COMMON	fig|224308.1.peg.3174	rxn12008	fig|224308.1.peg.3174rxn12008	0.305015
COMMON	fig|224308.1.peg.1011	rxn10199	fig|224308.1.peg.1011rxn10199	0.812647		COMMON	fig|224308.1.peg.1011	rxn10199	fig|224308.1.peg.1011rxn10199	0.812647
COMMON	fig|224308.1.peg.3854	rxn08333	fig|224308.1.peg.3854rxn08333	0.56673		COMMON	fig|224308.1.peg.3854	rxn08333	fig|224308.1.peg.3854rxn08333	0.56673
COMMON	fig|224308.1.peg.2959	rxn00986	fig|224308.1.peg.2959rxn00986	0.935025		COMMON	fig|224308.1.peg.2959	rxn00986	fig|224308.1.peg.2959rxn00986	0.935025
COMMON	fig|224308.1.peg.1654	rxn00119	fig|224308.1.peg.1654rxn00119	0.982227		COMMON	fig|224308.1.peg.1654	rxn00119	fig|224308.1.peg.1654rxn00119	0.982227
COMMON	fig|224308.1.peg.1763	rxn01951	fig|224308.1.peg.1763rxn01951	0.0173784		COMMON	fig|224308.1.peg.1763	rxn01951	fig|224308.1.peg.1763rxn01951	0.0173784
COMMON	fig|224308.1.peg.1667	rxn04413	fig|224308.1.peg.1667rxn04413	0.00236606		COMMON	fig|224308.1.peg.1667	rxn04413	fig|224308.1.peg.1667rxn04413	0.00236606
COMMON	fig|224308.1.peg.1667	rxn03537	fig|224308.1.peg.1667rxn03537	0.00236606		COMMON	fig|224308.1.peg.1667	rxn03537	fig|224308.1.peg.1667rxn03537	0.00236606
COMMON	fig|224308.1.peg.1912	rxn01274	fig|224308.1.peg.1912rxn01274	0.675233		COMMON	fig|224308.1.peg.1912	rxn01274	fig|224308.1.peg.1912rxn01274	0.675233
COMMON	fig|224308.1.peg.392	rxn00509	fig|224308.1.peg.392rxn00509	0.175668		COMMON	fig|224308.1.peg.392	rxn00509	fig|224308.1.peg.392rxn00509	0.175668
COMMON	fig|224308.1.peg.392	rxn00979	fig|224308.1.peg.392rxn00979	0.11607		COMMON	fig|224308.1.peg.392	rxn00979	fig|224308.1.peg.392rxn00979	0.11607
COMMON	fig|224308.1.peg.3152	rxn10199	fig|224308.1.peg.3152rxn10199	0.867465		COMMON	fig|224308.1.peg.3152	rxn10199	fig|224308.1.peg.3152rxn10199	0.867465
COMMON	fig|224308.1.peg.2196	rxn00205	fig|224308.1.peg.2196rxn00205	0.921928		COMMON	fig|224308.1.peg.2196	rxn00205	fig|224308.1.peg.2196rxn00205	0.921928
COMMON	fig|224308.1.peg.151	rxn11946	fig|224308.1.peg.151rxn11946	0.110879		COMMON	fig|224308.1.peg.151	rxn11946	fig|224308.1.peg.151rxn11946	0.110879
COMMON	fig|224308.1.peg.151	rxn03395	fig|224308.1.peg.151rxn03395	0.110879		COMMON	fig|224308.1.peg.151	rxn03395	fig|224308.1.peg.151rxn03395	0.110879
COMMON	fig|224308.1.peg.848	rxn02897	fig|224308.1.peg.848rxn02897	0.0204333		COMMON	fig|224308.1.peg.848	rxn02897	fig|224308.1.peg.848rxn02897	0.0204333
COMMON	fig|224308.1.peg.3468	rxn08129	fig|224308.1.peg.3468rxn08129	0.014385		COMMON	fig|224308.1.peg.3468	rxn08129	fig|224308.1.peg.3468rxn08129	0.014385
COMMON	fig|224308.1.peg.3251	rxn01746	fig|224308.1.peg.3251rxn01746	0.00162729		COMMON	fig|224308.1.peg.3251	rxn01746	fig|224308.1.peg.3251rxn01746	0.00162729
COMMON	fig|224308.1.peg.3251	rxn01523	fig|224308.1.peg.3251rxn01523	0.00117429		COMMON	fig|224308.1.peg.3251	rxn01523	fig|224308.1.peg.3251rxn01523	0.00117429
COMMON	fig|224308.1.peg.441	rxn03951	fig|224308.1.peg.441rxn03951	0.117018		COMMON	fig|224308.1.peg.441	rxn03951	fig|224308.1.peg.441rxn03951	0.117018
COMMON	fig|224308.1.peg.1978	rxn00656	fig|224308.1.peg.1978rxn00656	0.279408		COMMON	fig|224308.1.peg.1978	rxn00656	fig|224308.1.peg.1978rxn00656	0.279408
COMMON	fig|224308.1.peg.3757	rxn10199	fig|224308.1.peg.3757rxn10199	0.950734		COMMON	fig|224308.1.peg.3757	rxn10199	fig|224308.1.peg.3757rxn10199	0.950734
COMMON	fig|224308.1.peg.3321	rxn05029	fig|224308.1.peg.3321rxn05029	0.982777		COMMON	fig|224308.1.peg.3321	rxn05029	fig|224308.1.peg.3321rxn05029	0.982777
COMMON	fig|224308.1.peg.3259	rxn00375	fig|224308.1.peg.3259rxn00375	0.0033296		COMMON	fig|224308.1.peg.3259	rxn00375	fig|224308.1.peg.3259rxn00375	0.0033296
COMMON	fig|224308.1.peg.636	rxn00917	fig|224308.1.peg.636rxn00917	0.908939		COMMON	fig|224308.1.peg.636	rxn00917	fig|224308.1.peg.636rxn00917	0.908939
COMMON	fig|243273.1.peg.370	rxn00751	fig|243273.1.peg.370rxn00751	0.304082		COMMON	fig|243273.1.peg.370	rxn00751	fig|243273.1.peg.370rxn00751	0.304082
COMMON	fig|243273.1.peg.338	rxn11703	fig|243273.1.peg.338rxn11703	0.0123013		COMMON	fig|243273.1.peg.338	rxn11703	fig|243273.1.peg.338rxn11703	0.0123013
COMMON	fig|243273.1.peg.338	rxn08798	fig|243273.1.peg.338rxn08798	0.159101		COMMON	fig|243273.1.peg.338	rxn08798	fig|243273.1.peg.338rxn08798	0.159101
COMMON	fig|243273.1.peg.338	rxn08799	fig|243273.1.peg.338rxn08799	0.159101		COMMON	fig|243273.1.peg.338	rxn08799	fig|243273.1.peg.338rxn08799	0.159101
COMMON	fig|243273.1.peg.338	rxn08815	fig|243273.1.peg.338rxn08815	0.159101		COMMON	fig|243273.1.peg.338	rxn08815	fig|243273.1.peg.338rxn08815	0.159101
COMMON	fig|243273.1.peg.338	rxn08800	fig|243273.1.peg.338rxn08800	0.159101		COMMON	fig|243273.1.peg.338	rxn08800	fig|243273.1.peg.338rxn08800	0.159101
COMMON	fig|243273.1.peg.338	rxn08801	fig|243273.1.peg.338rxn08801	0.159101		COMMON	fig|243273.1.peg.338	rxn08801	fig|243273.1.peg.338rxn08801	0.159101
COMMON	fig|243273.1.peg.338	rxn08802	fig|243273.1.peg.338rxn08802	0.159101		COMMON	fig|243273.1.peg.338	rxn08802	fig|243273.1.peg.338rxn08802	0.159101
COMMON	fig|243273.1.peg.338	rxn08810	fig|243273.1.peg.338rxn08810	0.159101		COMMON	fig|243273.1.peg.338	rxn08810	fig|243273.1.peg.338rxn08810	0.159101
COMMON	fig|243273.1.peg.338	rxn08796	fig|243273.1.peg.338rxn08796	0.159101		COMMON	fig|243273.1.peg.338	rxn08796	fig|243273.1.peg.338rxn08796	0.159101
COMMON	fig|243273.1.peg.338	rxn08843	fig|243273.1.peg.338rxn08843	0.159101		COMMON	fig|243273.1.peg.338	rxn08843	fig|243273.1.peg.338rxn08843	0.159101
COMMON	fig|243273.1.peg.338	rxn08846	fig|243273.1.peg.338rxn08846	0.159101		COMMON	fig|243273.1.peg.338	rxn08846	fig|243273.1.peg.338rxn08846	0.159101
COMMON	fig|243273.1.peg.338	rxn08797	fig|243273.1.peg.338rxn08797	0.159101		COMMON	fig|243273.1.peg.338	rxn08797	fig|243273.1.peg.338rxn08797	0.159101
COMMON	fig|243273.1.peg.134	rxn00355	fig|243273.1.peg.134rxn00355	0.0052328		COMMON	fig|243273.1.peg.134	rxn00355	fig|243273.1.peg.134rxn00355	0.0052328
COMMON	fig|243273.1.peg.448	rxn01517	fig|243273.1.peg.448rxn01517	0.96405		COMMON	fig|243273.1.peg.448	rxn01517	fig|243273.1.peg.448rxn01517	0.96405
COMMON	fig|243273.1.peg.448	rxn00119	fig|243273.1.peg.448rxn00119	0.96405		COMMON	fig|243273.1.peg.448	rxn00119	fig|243273.1.peg.448rxn00119	0.96405
COMMON	fig|243273.1.peg.349	rxn09310	fig|243273.1.peg.349rxn09310	0.0486579		COMMON	fig|243273.1.peg.349	rxn09310	fig|243273.1.peg.349rxn09310	0.0486579
COMMON	fig|243273.1.peg.73	rxn05528	fig|243273.1.peg.73rxn05528	0.363459		COMMON	fig|243273.1.peg.73	rxn05528	fig|243273.1.peg.73rxn05528	0.363459
COMMON	fig|243273.1.peg.387	rxn09310	fig|243273.1.peg.387rxn09310	0.736475		COMMON	fig|243273.1.peg.387	rxn09310	fig|243273.1.peg.387rxn09310	0.736475
COMMON	fig|243273.1.peg.53	rxn00704	fig|243273.1.peg.53rxn00704	0.26152		COMMON	fig|243273.1.peg.53	rxn00704	fig|243273.1.peg.53rxn00704	0.26152
COMMON	fig|243277.1.peg.3455	rxn04047	fig|243277.1.peg.3455rxn04047	0.0056234		COMMON	fig|243277.1.peg.3455	rxn04047	fig|243277.1.peg.3455rxn04047	0.0056234
COMMON	fig|243277.1.peg.3455	rxn03540	fig|243277.1.peg.3455rxn03540	0.744055		COMMON	fig|243277.1.peg.3455	rxn03540	fig|243277.1.peg.3455rxn03540	0.744055
COMMON	fig|243277.1.peg.2582	rxn01111	fig|243277.1.peg.2582rxn01111	0.68309		COMMON	fig|243277.1.peg.2582	rxn01111	fig|243277.1.peg.2582rxn01111	0.68309
COMMON	fig|243277.1.peg.1394	rxn03075	fig|243277.1.peg.1394rxn03075	0.000256904		COMMON	fig|243277.1.peg.1394	rxn03075	fig|243277.1.peg.1394rxn03075	0.000256904
COMMON	fig|243277.1.peg.913	rxn08618	fig|243277.1.peg.913rxn08618	0.00131317		COMMON	fig|243277.1.peg.913	rxn08618	fig|243277.1.peg.913rxn08618	0.00131317
COMMON	fig|243277.1.peg.3335	rxn01204	fig|243277.1.peg.3335rxn01204	0.128592		COMMON	fig|243277.1.peg.3335	rxn01204	fig|243277.1.peg.3335rxn01204	0.128592
COMMON	fig|243277.1.peg.1722	rxn00509	fig|243277.1.peg.1722rxn00509	0.18748		COMMON	fig|243277.1.peg.1722	rxn00509	fig|243277.1.peg.1722rxn00509	0.18748
COMMON	fig|243277.1.peg.1722	rxn00979	fig|243277.1.peg.1722rxn00979	0.05289		COMMON	fig|243277.1.peg.1722	rxn00979	fig|243277.1.peg.1722rxn00979	0.05289
COMMON	fig|243277.1.peg.1565	rxn02270	fig|243277.1.peg.1565rxn02270	0.0680327		COMMON	fig|243277.1.peg.1565	rxn02270	fig|243277.1.peg.1565rxn02270	0.0680327
COMMON	fig|243277.1.peg.2642	rxn08333	fig|243277.1.peg.2642rxn08333	0.555692		COMMON	fig|243277.1.peg.2642	rxn08333	fig|243277.1.peg.2642rxn08333	0.555692
COMMON	fig|243277.1.peg.4306	rxn01895	fig|243277.1.peg.4306rxn01895	0.00454758		COMMON	fig|243277.1.peg.4306	rxn01895	fig|243277.1.peg.4306rxn01895	0.00454758
COMMON	fig|243277.1.peg.4306	rxn02483	fig|243277.1.peg.4306rxn02483	0.0139666		COMMON	fig|243277.1.peg.4306	rxn02483	fig|243277.1.peg.4306rxn02483	0.0139666
COMMON	fig|243277.1.peg.1224	rxn03538	fig|243277.1.peg.1224rxn03538	0.949239		COMMON	fig|243277.1.peg.1224	rxn03538	fig|243277.1.peg.1224rxn03538	0.949239
COMMON	fig|243277.1.peg.2992	rxn03030	fig|243277.1.peg.2992rxn03030	0.248291		COMMON	fig|243277.1.peg.2992	rxn03030	fig|243277.1.peg.2992rxn03030	0.248291
COMMON	fig|243277.1.peg.83	rxn03397	fig|243277.1.peg.83rxn03397	0.822053		COMMON	fig|243277.1.peg.83	rxn03397	fig|243277.1.peg.83rxn03397	0.822053
COMMON	fig|243277.1.peg.83	rxn10094	fig|243277.1.peg.83rxn10094	0.822053		COMMON	fig|243277.1.peg.83	rxn10094	fig|243277.1.peg.83rxn10094	0.822053
COMMON	fig|243277.1.peg.2230	rxn01517	fig|243277.1.peg.2230rxn01517	0.959171		COMMON	fig|243277.1.peg.2230	rxn01517	fig|243277.1.peg.2230rxn01517	0.959171
COMMON	fig|243277.1.peg.2230	rxn00119	fig|243277.1.peg.2230rxn00119	0.959171		COMMON	fig|243277.1.peg.2230	rxn00119	fig|243277.1.peg.2230rxn00119	0.959171
COMMON	fig|243277.1.peg.1949	rxn11703	fig|243277.1.peg.1949rxn11703	0.864282		COMMON	fig|243277.1.peg.1949	rxn11703	fig|243277.1.peg.1949rxn11703	0.864282
COMMON	fig|243277.1.peg.61	rxn09997	fig|243277.1.peg.61rxn09997	0.743405		COMMON	fig|243277.1.peg.61	rxn09997	fig|243277.1.peg.61rxn09997	0.743405
COMMON	fig|243277.1.peg.3223	rxn01022	fig|243277.1.peg.3223rxn01022	0.357262		COMMON	fig|243277.1.peg.3223	rxn01022	fig|243277.1.peg.3223rxn01022	0.357262
COMMON	fig|243277.1.peg.1919	rxn03630	fig|243277.1.peg.1919rxn03630	0.000997012		COMMON	fig|243277.1.peg.1919	rxn03630	fig|243277.1.peg.1919rxn03630	0.000997012
COMMON	fig|243277.1.peg.3587	rxn00577	fig|243277.1.peg.3587rxn00577	0.000780916		COMMON	fig|243277.1.peg.3587	rxn00577	fig|243277.1.peg.3587rxn00577	0.000780916
COMMON	fig|243277.1.peg.1045	rxn05403	fig|243277.1.peg.1045rxn05403	0.0661665		COMMON	fig|243277.1.peg.1045	rxn05403	fig|243277.1.peg.1045rxn05403	0.0661665
COMMON	fig|243277.1.peg.1045	rxn05378	fig|243277.1.peg.1045rxn05378	0.0661665		COMMON	fig|243277.1.peg.1045	rxn05378	fig|243277.1.peg.1045rxn05378	0.0661665
COMMON	fig|243277.1.peg.1045	rxn05395	fig|243277.1.peg.1045rxn05395	0.0661665		COMMON	fig|243277.1.peg.1045	rxn05395	fig|243277.1.peg.1045rxn05395	0.0661665
COMMON	fig|243277.1.peg.1045	rxn05387	fig|243277.1.peg.1045rxn05387	0.0661665		COMMON	fig|243277.1.peg.1045	rxn05387	fig|243277.1.peg.1045rxn05387	0.0661665
COMMON	fig|243277.1.peg.1045	rxn05362	fig|243277.1.peg.1045rxn05362	0.0661665		COMMON	fig|243277.1.peg.1045	rxn05362	fig|243277.1.peg.1045rxn05362	0.0661665
COMMON	fig|243277.1.peg.1045	rxn05399	fig|243277.1.peg.1045rxn05399	0.0661665		COMMON	fig|243277.1.peg.1045	rxn05399	fig|243277.1.peg.1045rxn05399	0.0661665
COMMON	fig|243277.1.peg.1045	rxn05366	fig|243277.1.peg.1045rxn05366	0.0661665		COMMON	fig|243277.1.peg.1045	rxn05366	fig|243277.1.peg.1045rxn05366	0.0661665
COMMON	fig|243277.1.peg.1045	rxn05357	fig|243277.1.peg.1045rxn05357	0.0661665		COMMON	fig|243277.1.peg.1045	rxn05357	fig|243277.1.peg.1045rxn05357	0.0661665
COMMON	fig|243277.1.peg.1045	rxn05356	fig|243277.1.peg.1045rxn05356	0.0661665		COMMON	fig|243277.1.peg.1045	rxn05356	fig|243277.1.peg.1045rxn05356	0.0661665
COMMON	fig|243277.1.peg.1045	rxn05355	fig|243277.1.peg.1045rxn05355	0.0661665		COMMON	fig|243277.1.peg.1045	rxn05355	fig|243277.1.peg.1045rxn05355	0.0661665
COMMON	fig|243277.1.peg.1045	rxn05354	fig|243277.1.peg.1045rxn05354	0.0661665		COMMON	fig|243277.1.peg.1045	rxn05354	fig|243277.1.peg.1045rxn05354	0.0661665
COMMON	fig|243277.1.peg.1045	rxn05353	fig|243277.1.peg.1045rxn05353	0.0661665		COMMON	fig|243277.1.peg.1045	rxn05353	fig|243277.1.peg.1045rxn05353	0.0661665
COMMON	fig|243277.1.peg.1045	rxn05352	fig|243277.1.peg.1045rxn05352	0.0661665		COMMON	fig|243277.1.peg.1045	rxn05352	fig|243277.1.peg.1045rxn05352	0.0661665
COMMON	fig|243277.1.peg.1045	rxn05351	fig|243277.1.peg.1045rxn05351	0.0661665		COMMON	fig|243277.1.peg.1045	rxn05351	fig|243277.1.peg.1045rxn05351	0.0661665
COMMON	fig|243277.1.peg.1513	rxn01169	fig|243277.1.peg.1513rxn01169	0.374848		COMMON	fig|243277.1.peg.1513	rxn01169	fig|243277.1.peg.1513rxn01169	0.374848
COMMON	fig|243277.1.peg.2022	rxn03886	fig|243277.1.peg.2022rxn03886	0.0672996		COMMON	fig|243277.1.peg.2022	rxn03886	fig|243277.1.peg.2022rxn03886	0.0672996
COMMON	fig|243277.1.peg.1667	rxn00817	fig|243277.1.peg.1667rxn00817	0.888938		COMMON	fig|243277.1.peg.1667	rxn00817	fig|243277.1.peg.1667rxn00817	0.888938
COMMON	fig|243277.1.peg.3901	rxn03167	fig|243277.1.peg.3901rxn03167	0.786826		COMMON	fig|243277.1.peg.3901	rxn03167	fig|243277.1.peg.3901rxn03167	0.786826
COMMON	fig|243277.1.peg.4174	rxn01303	fig|243277.1.peg.4174rxn01303	0.0305733		COMMON	fig|243277.1.peg.4174	rxn01303	fig|243277.1.peg.4174rxn01303	0.0305733
COMMON	fig|243277.1.peg.3905	rxn05159	fig|243277.1.peg.3905rxn05159	0.00378115		COMMON	fig|243277.1.peg.3905	rxn05159	fig|243277.1.peg.3905rxn05159	0.00378115
COMMON	fig|243277.1.peg.3919	rxn00022	fig|243277.1.peg.3919rxn00022	0.298654		COMMON	fig|243277.1.peg.3919	rxn00022	fig|243277.1.peg.3919rxn00022	0.298654
COMMON	fig|243277.1.peg.228	rxn01675	fig|243277.1.peg.228rxn01675	0.0144141		COMMON	fig|243277.1.peg.228	rxn01675	fig|243277.1.peg.228rxn01675	0.0144141
COMMON	fig|243277.1.peg.4101	rxn03856	fig|243277.1.peg.4101rxn03856	0.00145726		COMMON	fig|243277.1.peg.4101	rxn03856	fig|243277.1.peg.4101rxn03856	0.00145726
COMMON	fig|243277.1.peg.2221	rxn05381	fig|243277.1.peg.2221rxn05381	0.724668		COMMON	fig|243277.1.peg.2221	rxn05381	fig|243277.1.peg.2221rxn05381	0.724668
COMMON	fig|243277.1.peg.2221	rxn05390	fig|243277.1.peg.2221rxn05390	0.724668		COMMON	fig|243277.1.peg.2221	rxn05390	fig|243277.1.peg.2221rxn05390	0.724668
COMMON	fig|243277.1.peg.2221	rxn05402	fig|243277.1.peg.2221rxn05402	0.724668		COMMON	fig|243277.1.peg.2221	rxn05402	fig|243277.1.peg.2221rxn05402	0.724668
COMMON	fig|243277.1.peg.2221	rxn05386	fig|243277.1.peg.2221rxn05386	0.724668		COMMON	fig|243277.1.peg.2221	rxn05386	fig|243277.1.peg.2221rxn05386	0.724668
COMMON	fig|243277.1.peg.2221	rxn05394	fig|243277.1.peg.2221rxn05394	0.724668		COMMON	fig|243277.1.peg.2221	rxn05394	fig|243277.1.peg.2221rxn05394	0.724668
COMMON	fig|243277.1.peg.2221	rxn05377	fig|243277.1.peg.2221rxn05377	0.724668		COMMON	fig|243277.1.peg.2221	rxn05377	fig|243277.1.peg.2221rxn05377	0.724668
COMMON	fig|243277.1.peg.2221	rxn05398	fig|243277.1.peg.2221rxn05398	0.724668		COMMON	fig|243277.1.peg.2221	rxn05398	fig|243277.1.peg.2221rxn05398	0.724668
COMMON	fig|243277.1.peg.2221	rxn05373	fig|243277.1.peg.2221rxn05373	0.724668		COMMON	fig|243277.1.peg.2221	rxn05373	fig|243277.1.peg.2221rxn05373	0.724668
COMMON	fig|243277.1.peg.2221	rxn05365	fig|243277.1.peg.2221rxn05365	0.724668		COMMON	fig|243277.1.peg.2221	rxn05365	fig|243277.1.peg.2221rxn05365	0.724668
COMMON	fig|243277.1.peg.2221	rxn05462	fig|243277.1.peg.2221rxn05462	0.724668		COMMON	fig|243277.1.peg.2221	rxn05462	fig|243277.1.peg.2221rxn05462	0.724668
COMMON	fig|243277.1.peg.2221	rxn05369	fig|243277.1.peg.2221rxn05369	0.724668		COMMON	fig|243277.1.peg.2221	rxn05369	fig|243277.1.peg.2221rxn05369	0.724668
COMMON	fig|243277.1.peg.2221	rxn05406	fig|243277.1.peg.2221rxn05406	0.724668		COMMON	fig|243277.1.peg.2221	rxn05406	fig|243277.1.peg.2221rxn05406	0.724668
COMMON	fig|243277.1.peg.2221	rxn05361	fig|243277.1.peg.2221rxn05361	0.724668		COMMON	fig|243277.1.peg.2221	rxn05361	fig|243277.1.peg.2221rxn05361	0.724668
COMMON	fig|243277.1.peg.1961	rxn09953	fig|243277.1.peg.1961rxn09953	0.0321766		COMMON	fig|243277.1.peg.1961	rxn09953	fig|243277.1.peg.1961rxn09953	0.0321766
COMMON	fig|243277.1.peg.2362	rxn02929	fig|243277.1.peg.2362rxn02929	0.409988		COMMON	fig|243277.1.peg.2362	rxn02929	fig|243277.1.peg.2362rxn02929	0.409988
COMMON	fig|266834.1.peg.1144	rxn03906	fig|266834.1.peg.1144rxn03906	0.714742		COMMON	fig|266834.1.peg.1144	rxn03906	fig|266834.1.peg.1144rxn03906	0.714742
COMMON	fig|266834.1.peg.2865	rxn08618	fig|266834.1.peg.2865rxn08618	0.1201		COMMON	fig|266834.1.peg.2865	rxn08618	fig|266834.1.peg.2865rxn08618	0.1201
COMMON	fig|266834.1.peg.5708	rxn03919	fig|266834.1.peg.5708rxn03919	0.00584056		COMMON	fig|266834.1.peg.5708	rxn03919	fig|266834.1.peg.5708rxn03919	0.00584056
COMMON	fig|266834.1.peg.3257	rxn03540	fig|266834.1.peg.3257rxn03540	0.76216		COMMON	fig|266834.1.peg.3257	rxn03540	fig|266834.1.peg.3257rxn03540	0.76216
COMMON	fig|266834.1.peg.3695	rxn05181	fig|266834.1.peg.3695rxn05181	0.6011		COMMON	fig|266834.1.peg.3695	rxn05181	fig|266834.1.peg.3695rxn05181	0.6011
COMMON	fig|266834.1.peg.5883	rxn01292	fig|266834.1.peg.5883rxn01292	0.789258		COMMON	fig|266834.1.peg.5883	rxn01292	fig|266834.1.peg.5883rxn01292	0.789258
COMMON	fig|266834.1.peg.1658	rxn03397	fig|266834.1.peg.1658rxn03397	0.825517		COMMON	fig|266834.1.peg.1658	rxn03397	fig|266834.1.peg.1658rxn03397	0.825517
COMMON	fig|266834.1.peg.1658	rxn10094	fig|266834.1.peg.1658rxn10094	0.825517		COMMON	fig|266834.1.peg.1658	rxn10094	fig|266834.1.peg.1658rxn10094	0.825517
COMMON	fig|266834.1.peg.2334	rxn03919	fig|266834.1.peg.2334rxn03919	0.00578445		COMMON	fig|266834.1.peg.2334	rxn03919	fig|266834.1.peg.2334rxn03919	0.00578445
COMMON	fig|266834.1.peg.4775	rxn01644	fig|266834.1.peg.4775rxn01644	0.0300075		COMMON	fig|266834.1.peg.4775	rxn01644	fig|266834.1.peg.4775rxn01644	0.0300075
COMMON	fig|266834.1.peg.3237	rxn04384	fig|266834.1.peg.3237rxn04384	0.75476		COMMON	fig|266834.1.peg.3237	rxn04384	fig|266834.1.peg.3237rxn04384	0.75476
COMMON	fig|266834.1.peg.2864	rxn08583	fig|266834.1.peg.2864rxn08583	0.00291147		COMMON	fig|266834.1.peg.2864	rxn08583	fig|266834.1.peg.2864rxn08583	0.00291147
COMMON	fig|266834.1.peg.3239	rxn06979	fig|266834.1.peg.3239rxn06979	0.98705		COMMON	fig|266834.1.peg.3239	rxn06979	fig|266834.1.peg.3239rxn06979	0.98705
COMMON	fig|266834.1.peg.3239	rxn11544	fig|266834.1.peg.3239rxn11544	0.98705		COMMON	fig|266834.1.peg.3239	rxn11544	fig|266834.1.peg.3239rxn11544	0.98705
COMMON	fig|266834.1.peg.4233	rxn01825	fig|266834.1.peg.4233rxn01825	0.990697		COMMON	fig|266834.1.peg.4233	rxn01825	fig|266834.1.peg.4233rxn01825	0.990697
COMMON	fig|266834.1.peg.5733	rxn00856	fig|266834.1.peg.5733rxn00856	0.03414		COMMON	fig|266834.1.peg.5733	rxn00856	fig|266834.1.peg.5733rxn00856	0.03414
COMMON	fig|266834.1.peg.1418	rxn05516	fig|266834.1.peg.1418rxn05516	0.753532		COMMON	fig|266834.1.peg.1418	rxn05516	fig|266834.1.peg.1418rxn05516	0.753532
COMMON	fig|266834.1.peg.548	rxn05516	fig|266834.1.peg.548rxn05516	0.881292		COMMON	fig|266834.1.peg.548	rxn05516	fig|266834.1.peg.548rxn05516	0.881292
COMMON	fig|266834.1.peg.5486	rxn00979	fig|266834.1.peg.5486rxn00979	0.108046		COMMON	fig|266834.1.peg.5486	rxn00979	fig|266834.1.peg.5486rxn00979	0.108046
COMMON	fig|266834.1.peg.4868	rxn08713	fig|266834.1.peg.4868rxn08713	0.0909723		COMMON	fig|266834.1.peg.4868	rxn08713	fig|266834.1.peg.4868rxn08713	0.0909723
COMMON	fig|266834.1.peg.1455	rxn02929	fig|266834.1.peg.1455rxn02929	0.357143		COMMON	fig|266834.1.peg.1455	rxn02929	fig|266834.1.peg.1455rxn02929	0.357143
COMMON	fig|266834.1.peg.1849	rxn03086	fig|266834.1.peg.1849rxn03086	0.170018		COMMON	fig|266834.1.peg.1849	rxn03086	fig|266834.1.peg.1849rxn03086	0.170018
COMMON	fig|266834.1.peg.6092	rxn03030	fig|266834.1.peg.6092rxn03030	0.143993		COMMON	fig|266834.1.peg.6092	rxn03030	fig|266834.1.peg.6092rxn03030	0.143993
COMMON	fig|266834.1.peg.589	rxn05516	fig|266834.1.peg.589rxn05516	0.921249		COMMON	fig|266834.1.peg.589	rxn05516	fig|266834.1.peg.589rxn05516	0.921249
COMMON	fig|266834.1.peg.759	rxn02946	fig|266834.1.peg.759rxn02946	0.415185		COMMON	fig|266834.1.peg.759	rxn02946	fig|266834.1.peg.759rxn02946	0.415185
COMMON	fig|266834.1.peg.1992	rxn00606	fig|266834.1.peg.1992rxn00606	0.0333471		COMMON	fig|266834.1.peg.1992	rxn00606	fig|266834.1.peg.1992rxn00606	0.0333471
COMMON	fig|266834.1.peg.1992	rxn05746	fig|266834.1.peg.1992rxn05746	0.104144		COMMON	fig|266834.1.peg.1992	rxn05746	fig|266834.1.peg.1992rxn05746	0.104144
COMMON	fig|266834.1.peg.2791	rxn00119	fig|266834.1.peg.2791rxn00119	0.973564		COMMON	fig|266834.1.peg.2791	rxn00119	fig|266834.1.peg.2791rxn00119	0.973564
COMMON	fig|266834.1.peg.3556	rxn01022	fig|266834.1.peg.3556rxn01022	0.488588		COMMON	fig|266834.1.peg.3556	rxn01022	fig|266834.1.peg.3556rxn01022	0.488588
COMMON	fig|266834.1.peg.2428	rxn03075	fig|266834.1.peg.2428rxn03075	0.000778058		COMMON	fig|266834.1.peg.2428	rxn03075	fig|266834.1.peg.2428rxn03075	0.000778058
COMMON	fig|266834.1.peg.1085	rxn04082	fig|266834.1.peg.1085rxn04082	0.745629		COMMON	fig|266834.1.peg.1085	rxn04082	fig|266834.1.peg.1085rxn04082	0.745629
COMMON	fig|266834.1.peg.1308	rxn00979	fig|266834.1.peg.1308rxn00979	0.110725		COMMON	fig|266834.1.peg.1308	rxn00979	fig|266834.1.peg.1308rxn00979	0.110725
COMMON	fig|266834.1.peg.3179	rxn03538	fig|266834.1.peg.3179rxn03538	0.936247		COMMON	fig|266834.1.peg.3179	rxn03538	fig|266834.1.peg.3179rxn03538	0.936247
COMMON	fig|266834.1.peg.6008	rxn05104	fig|266834.1.peg.6008rxn05104	0.172526		COMMON	fig|266834.1.peg.6008	rxn05104	fig|266834.1.peg.6008rxn05104	0.172526
COMMON	fig|266834.1.peg.5653	rxn05516	fig|266834.1.peg.5653rxn05516	0.880359		COMMON	fig|266834.1.peg.5653	rxn05516	fig|266834.1.peg.5653rxn05516	0.880359
COMMON	fig|266834.1.peg.4213	rxn07587	fig|266834.1.peg.4213rxn07587	0.000946024		COMMON	fig|266834.1.peg.4213	rxn07587	fig|266834.1.peg.4213rxn07587	0.000946024
COMMON	fig|266834.1.peg.4213	rxn03491	fig|266834.1.peg.4213rxn03491	0.97592		COMMON	fig|266834.1.peg.4213	rxn03491	fig|266834.1.peg.4213rxn03491	0.97592
COMMON	fig|266834.1.peg.5292	rxn08713	fig|266834.1.peg.5292rxn08713	0.108811		COMMON	fig|266834.1.peg.5292	rxn08713	fig|266834.1.peg.5292rxn08713	0.108811
COMMON	fig|266834.1.peg.5180	rxn08954	fig|266834.1.peg.5180rxn08954	0.118594		COMMON	fig|266834.1.peg.5180	rxn08954	fig|266834.1.peg.5180rxn08954	0.118594
COMMON	fig|266834.1.peg.5200	rxn03030	fig|266834.1.peg.5200rxn03030	0.136316		COMMON	fig|266834.1.peg.5200	rxn03030	fig|266834.1.peg.5200rxn03030	0.136316
COMMON	fig|266834.1.peg.6162	rxn09997	fig|266834.1.peg.6162rxn09997	0.743405		COMMON	fig|266834.1.peg.6162	rxn09997	fig|266834.1.peg.6162rxn09997	0.743405
COMMON	fig|266834.1.peg.1310	rxn01990	fig|266834.1.peg.1310rxn01990	0.133826		COMMON	fig|266834.1.peg.1310	rxn01990	fig|266834.1.peg.1310rxn01990	0.133826
COMMON	fig|266834.1.peg.1310	rxn02346	fig|266834.1.peg.1310rxn02346	0.133826		COMMON	fig|266834.1.peg.1310	rxn02346	fig|266834.1.peg.1310rxn02346	0.133826
COMMON	fig|266834.1.peg.4232	rxn00993	fig|266834.1.peg.4232rxn00993	0.58346		COMMON	fig|266834.1.peg.4232	rxn00993	fig|266834.1.peg.4232rxn00993	0.58346
COMMON	fig|266834.1.peg.1146	rxn08468	fig|266834.1.peg.1146rxn08468	0.285737		COMMON	fig|266834.1.peg.1146	rxn08468	fig|266834.1.peg.1146rxn08468	0.285737
COMMON	fig|266834.1.peg.1146	rxn08469	fig|266834.1.peg.1146rxn08469	0.285737		COMMON	fig|266834.1.peg.1146	rxn08469	fig|266834.1.peg.1146rxn08469	0.285737
COMMON	fig|266834.1.peg.1146	rxn08471	fig|266834.1.peg.1146rxn08471	0.285737		COMMON	fig|266834.1.peg.1146	rxn08471	fig|266834.1.peg.1146rxn08471	0.285737
COMMON	fig|266834.1.peg.1146	rxn08470	fig|266834.1.peg.1146rxn08470	0.285737		COMMON	fig|266834.1.peg.1146	rxn08470	fig|266834.1.peg.1146rxn08470	0.285737
COMMON	fig|266834.1.peg.1146	rxn08467	fig|266834.1.peg.1146rxn08467	0.285737		COMMON	fig|266834.1.peg.1146	rxn08467	fig|266834.1.peg.1146rxn08467	0.285737
COMMON	fig|266834.1.peg.1146	rxn10067	fig|266834.1.peg.1146rxn10067	0.285737		COMMON	fig|266834.1.peg.1146	rxn10067	fig|266834.1.peg.1146rxn10067	0.285737
COMMON	fig|266834.1.peg.4214	rxn03492	fig|266834.1.peg.4214rxn03492	0.97473		COMMON	fig|266834.1.peg.4214	rxn03492	fig|266834.1.peg.4214rxn03492	0.97473
COMMON	fig|266834.1.peg.4214	rxn04050	fig|266834.1.peg.4214rxn04050	0.97473		COMMON	fig|266834.1.peg.4214	rxn04050	fig|266834.1.peg.4214rxn04050	0.97473
COMMON	fig|266834.1.peg.2117	rxn01830	fig|266834.1.peg.2117rxn01830	0.173454		COMMON	fig|266834.1.peg.2117	rxn01830	fig|266834.1.peg.2117rxn01830	0.173454
COMMON	fig|266834.1.peg.2117	rxn01751	fig|266834.1.peg.2117rxn01751	0.107099		COMMON	fig|266834.1.peg.2117	rxn01751	fig|266834.1.peg.2117rxn01751	0.107099
COMMON	fig|266834.1.peg.4406	rxn01635	fig|266834.1.peg.4406rxn01635	0.943868		COMMON	fig|266834.1.peg.4406	rxn01635	fig|266834.1.peg.4406rxn01635	0.943868
COMMON	fig|266834.1.peg.4151	rxn09128	fig|266834.1.peg.4151rxn09128	0.00172398		COMMON	fig|266834.1.peg.4151	rxn09128	fig|266834.1.peg.4151rxn09128	0.00172398
COMMON	fig|266834.1.peg.4151	rxn09129	fig|266834.1.peg.4151rxn09129	0.00172398		COMMON	fig|266834.1.peg.4151	rxn09129	fig|266834.1.peg.4151rxn09129	0.00172398
COMMON	fig|266834.1.peg.4151	rxn09160	fig|266834.1.peg.4151rxn09160	0.00172398		COMMON	fig|266834.1.peg.4151	rxn09160	fig|266834.1.peg.4151rxn09160	0.00172398
COMMON	fig|266834.1.peg.4151	rxn09161	fig|266834.1.peg.4151rxn09161	0.00172398		COMMON	fig|266834.1.peg.4151	rxn09161	fig|266834.1.peg.4151rxn09161	0.00172398
COMMON	fig|266834.1.peg.4151	rxn09162	fig|266834.1.peg.4151rxn09162	0.00172398		COMMON	fig|266834.1.peg.4151	rxn09162	fig|266834.1.peg.4151rxn09162	0.00172398
COMMON	fig|266834.1.peg.4151	rxn09163	fig|266834.1.peg.4151rxn09163	0.00172398		COMMON	fig|266834.1.peg.4151	rxn09163	fig|266834.1.peg.4151rxn09163	0.00172398
COMMON	fig|266834.1.peg.4151	rxn09123	fig|266834.1.peg.4151rxn09123	0.00172398		COMMON	fig|266834.1.peg.4151	rxn09123	fig|266834.1.peg.4151rxn09123	0.00172398
COMMON	fig|266834.1.peg.4151	rxn09124	fig|266834.1.peg.4151rxn09124	0.00172398		COMMON	fig|266834.1.peg.4151	rxn09124	fig|266834.1.peg.4151rxn09124	0.00172398
COMMON	fig|266834.1.peg.4151	rxn09125	fig|266834.1.peg.4151rxn09125	0.00172398		COMMON	fig|266834.1.peg.4151	rxn09125	fig|266834.1.peg.4151rxn09125	0.00172398
COMMON	fig|266834.1.peg.4151	rxn09126	fig|266834.1.peg.4151rxn09126	0.00172398		COMMON	fig|266834.1.peg.4151	rxn09126	fig|266834.1.peg.4151rxn09126	0.00172398
COMMON	fig|266834.1.peg.4151	rxn09127	fig|266834.1.peg.4151rxn09127	0.00172398		COMMON	fig|266834.1.peg.4151	rxn09127	fig|266834.1.peg.4151rxn09127	0.00172398
COMMON	fig|266834.1.peg.4151	rxn09164	fig|266834.1.peg.4151rxn09164	0.00172398		COMMON	fig|266834.1.peg.4151	rxn09164	fig|266834.1.peg.4151rxn09164	0.00172398
COMMON	fig|266834.1.peg.4151	rxn09159	fig|266834.1.peg.4151rxn09159	0.00172398		COMMON	fig|266834.1.peg.4151	rxn09159	fig|266834.1.peg.4151rxn09159	0.00172398
COMMON	fig|266834.1.peg.4151	rxn09158	fig|266834.1.peg.4151rxn09158	0.00172398		COMMON	fig|266834.1.peg.4151	rxn09158	fig|266834.1.peg.4151rxn09158	0.00172398
COMMON	fig|266834.1.peg.4151	rxn09155	fig|266834.1.peg.4151rxn09155	0.00172398		COMMON	fig|266834.1.peg.4151	rxn09155	fig|266834.1.peg.4151rxn09155	0.00172398
COMMON	fig|266834.1.peg.4151	rxn09154	fig|266834.1.peg.4151rxn09154	0.00172398		COMMON	fig|266834.1.peg.4151	rxn09154	fig|266834.1.peg.4151rxn09154	0.00172398
COMMON	fig|266834.1.peg.4151	rxn09157	fig|266834.1.peg.4151rxn09157	0.00172398		COMMON	fig|266834.1.peg.4151	rxn09157	fig|266834.1.peg.4151rxn09157	0.00172398
COMMON	fig|266834.1.peg.4151	rxn09151	fig|266834.1.peg.4151rxn09151	0.00172398		COMMON	fig|266834.1.peg.4151	rxn09151	fig|266834.1.peg.4151rxn09151	0.00172398
COMMON	fig|266834.1.peg.4151	rxn09150	fig|266834.1.peg.4151rxn09150	0.00172398		COMMON	fig|266834.1.peg.4151	rxn09150	fig|266834.1.peg.4151rxn09150	0.00172398
COMMON	fig|266834.1.peg.4151	rxn09153	fig|266834.1.peg.4151rxn09153	0.00172398		COMMON	fig|266834.1.peg.4151	rxn09153	fig|266834.1.peg.4151rxn09153	0.00172398
COMMON	fig|266834.1.peg.4151	rxn09152	fig|266834.1.peg.4151rxn09152	0.00172398		COMMON	fig|266834.1.peg.4151	rxn09152	fig|266834.1.peg.4151rxn09152	0.00172398
COMMON	fig|266834.1.peg.4151	rxn09139	fig|266834.1.peg.4151rxn09139	0.00172398		COMMON	fig|266834.1.peg.4151	rxn09139	fig|266834.1.peg.4151rxn09139	0.00172398
COMMON	fig|266834.1.peg.4151	rxn09138	fig|266834.1.peg.4151rxn09138	0.00172398		COMMON	fig|266834.1.peg.4151	rxn09138	fig|266834.1.peg.4151rxn09138	0.00172398
COMMON	fig|266834.1.peg.4151	rxn09133	fig|266834.1.peg.4151rxn09133	0.00172398		COMMON	fig|266834.1.peg.4151	rxn09133	fig|266834.1.peg.4151rxn09133	0.00172398
COMMON	fig|266834.1.peg.4151	rxn09132	fig|266834.1.peg.4151rxn09132	0.00172398		COMMON	fig|266834.1.peg.4151	rxn09132	fig|266834.1.peg.4151rxn09132	0.00172398
COMMON	fig|266834.1.peg.4151	rxn09131	fig|266834.1.peg.4151rxn09131	0.00172398		COMMON	fig|266834.1.peg.4151	rxn09131	fig|266834.1.peg.4151rxn09131	0.00172398
COMMON	fig|266834.1.peg.4151	rxn09130	fig|266834.1.peg.4151rxn09130	0.00172398		COMMON	fig|266834.1.peg.4151	rxn09130	fig|266834.1.peg.4151rxn09130	0.00172398
COMMON	fig|266834.1.peg.4151	rxn09137	fig|266834.1.peg.4151rxn09137	0.00172398		COMMON	fig|266834.1.peg.4151	rxn09137	fig|266834.1.peg.4151rxn09137	0.00172398
COMMON	fig|266834.1.peg.4151	rxn09136	fig|266834.1.peg.4151rxn09136	0.00172398		COMMON	fig|266834.1.peg.4151	rxn09136	fig|266834.1.peg.4151rxn09136	0.00172398
COMMON	fig|266834.1.peg.4151	rxn09135	fig|266834.1.peg.4151rxn09135	0.00172398		COMMON	fig|266834.1.peg.4151	rxn09135	fig|266834.1.peg.4151rxn09135	0.00172398
COMMON	fig|266834.1.peg.4151	rxn09134	fig|266834.1.peg.4151rxn09134	0.00172398		COMMON	fig|266834.1.peg.4151	rxn09134	fig|266834.1.peg.4151rxn09134	0.00172398
COMMON	fig|266834.1.peg.4151	rxn09148	fig|266834.1.peg.4151rxn09148	0.00172398		COMMON	fig|266834.1.peg.4151	rxn09148	fig|266834.1.peg.4151rxn09148	0.00172398
COMMON	fig|266834.1.peg.4151	rxn09142	fig|266834.1.peg.4151rxn09142	0.00172398		COMMON	fig|266834.1.peg.4151	rxn09142	fig|266834.1.peg.4151rxn09142	0.00172398
COMMON	fig|266834.1.peg.4151	rxn09143	fig|266834.1.peg.4151rxn09143	0.00172398		COMMON	fig|266834.1.peg.4151	rxn09143	fig|266834.1.peg.4151rxn09143	0.00172398
COMMON	fig|266834.1.peg.4151	rxn09140	fig|266834.1.peg.4151rxn09140	0.00172398		COMMON	fig|266834.1.peg.4151	rxn09140	fig|266834.1.peg.4151rxn09140	0.00172398
COMMON	fig|266834.1.peg.4151	rxn09141	fig|266834.1.peg.4151rxn09141	0.00172398		COMMON	fig|266834.1.peg.4151	rxn09141	fig|266834.1.peg.4151rxn09141	0.00172398
COMMON	fig|266834.1.peg.4151	rxn09146	fig|266834.1.peg.4151rxn09146	0.00172398		COMMON	fig|266834.1.peg.4151	rxn09146	fig|266834.1.peg.4151rxn09146	0.00172398
COMMON	fig|266834.1.peg.4151	rxn09144	fig|266834.1.peg.4151rxn09144	0.00172398		COMMON	fig|266834.1.peg.4151	rxn09144	fig|266834.1.peg.4151rxn09144	0.00172398
COMMON	fig|266834.1.peg.5073	rxn05416	fig|266834.1.peg.5073rxn05416	0.442887		COMMON	fig|266834.1.peg.5073	rxn05416	fig|266834.1.peg.5073rxn05416	0.442887
COMMON	fig|266834.1.peg.5073	rxn05412	fig|266834.1.peg.5073rxn05412	0.442887		COMMON	fig|266834.1.peg.5073	rxn05412	fig|266834.1.peg.5073rxn05412	0.442887
COMMON	fig|266834.1.peg.5073	rxn05428	fig|266834.1.peg.5073rxn05428	0.442887		COMMON	fig|266834.1.peg.5073	rxn05428	fig|266834.1.peg.5073rxn05428	0.442887
COMMON	fig|266834.1.peg.5073	rxn05432	fig|266834.1.peg.5073rxn05432	0.442887		COMMON	fig|266834.1.peg.5073	rxn05432	fig|266834.1.peg.5073rxn05432	0.442887
COMMON	fig|266834.1.peg.5073	rxn05424	fig|266834.1.peg.5073rxn05424	0.442887		COMMON	fig|266834.1.peg.5073	rxn05424	fig|266834.1.peg.5073rxn05424	0.442887
COMMON	fig|266834.1.peg.5073	rxn05420	fig|266834.1.peg.5073rxn05420	0.442887		COMMON	fig|266834.1.peg.5073	rxn05420	fig|266834.1.peg.5073rxn05420	0.442887
COMMON	fig|266834.1.peg.1510	rxn03906	fig|266834.1.peg.1510rxn03906	0.631178		COMMON	fig|266834.1.peg.1510	rxn03906	fig|266834.1.peg.1510rxn03906	0.631178
COMMON	fig|266834.1.peg.1404	rxn01751	fig|266834.1.peg.1404rxn01751	0.126054		COMMON	fig|266834.1.peg.1404	rxn01751	fig|266834.1.peg.1404rxn01751	0.126054
COMMON	fig|266834.1.peg.6041	rxn03075	fig|266834.1.peg.6041rxn03075	0.000866518		COMMON	fig|266834.1.peg.6041	rxn03075	fig|266834.1.peg.6041rxn03075	0.000866518
COMMON	fig|266834.1.peg.279	rxn03150	fig|266834.1.peg.279rxn03150	0.327475		COMMON	fig|266834.1.peg.279	rxn03150	fig|266834.1.peg.279rxn03150	0.327475
COMMON	fig|266834.1.peg.4870	rxn03511	fig|266834.1.peg.4870rxn03511	0.00238984		COMMON	fig|266834.1.peg.4870	rxn03511	fig|266834.1.peg.4870rxn03511	0.00238984
COMMON	fig|266834.1.peg.373	rxn01633	fig|266834.1.peg.373rxn01633	0.360179		COMMON	fig|266834.1.peg.373	rxn01633	fig|266834.1.peg.373rxn01633	0.360179
COMMON	fig|266834.1.peg.5447	rxn05181	fig|266834.1.peg.5447rxn05181	0.634988		COMMON	fig|266834.1.peg.5447	rxn05181	fig|266834.1.peg.5447rxn05181	0.634988
COMMON	fig|266834.1.peg.1330	rxn00641	fig|266834.1.peg.1330rxn00641	0.241867		COMMON	fig|266834.1.peg.1330	rxn00641	fig|266834.1.peg.1330rxn00641	0.241867
COMMON	fig|266834.1.peg.4387	rxn02222	fig|266834.1.peg.4387rxn02222	0.0881401		COMMON	fig|266834.1.peg.4387	rxn02222	fig|266834.1.peg.4387rxn02222	0.0881401
COMMON	fig|266834.1.peg.5597	rxn01094	fig|266834.1.peg.5597rxn01094	0.00616964		COMMON	fig|266834.1.peg.5597	rxn01094	fig|266834.1.peg.5597rxn01094	0.00616964
COMMON	fig|266834.1.peg.3484	rxn01343	fig|266834.1.peg.3484rxn01343	0.0535145		COMMON	fig|266834.1.peg.3484	rxn01343	fig|266834.1.peg.3484rxn01343	0.0535145
COMMON	fig|266834.1.peg.5106	rxn02161	fig|266834.1.peg.5106rxn02161	0.465612		COMMON	fig|266834.1.peg.5106	rxn02161	fig|266834.1.peg.5106rxn02161	0.465612
COMMON	fig|266834.1.peg.5282	rxn08619	fig|266834.1.peg.5282rxn08619	0.218001		COMMON	fig|266834.1.peg.5282	rxn08619	fig|266834.1.peg.5282rxn08619	0.218001
COMMON	fig|266834.1.peg.5282	rxn08620	fig|266834.1.peg.5282rxn08620	0.152679		COMMON	fig|266834.1.peg.5282	rxn08620	fig|266834.1.peg.5282rxn08620	0.152679
COMMON	fig|266834.1.peg.437	rxn00979	fig|266834.1.peg.437rxn00979	0.110526		COMMON	fig|266834.1.peg.437	rxn00979	fig|266834.1.peg.437rxn00979	0.110526
COMMON	fig|266834.1.peg.5321	rxn02832	fig|266834.1.peg.5321rxn02832	0.0197332		COMMON	fig|266834.1.peg.5321	rxn02832	fig|266834.1.peg.5321rxn02832	0.0197332
COMMON	fig|266834.1.peg.23	rxn00509	fig|266834.1.peg.23rxn00509	0.284781		COMMON	fig|266834.1.peg.23	rxn00509	fig|266834.1.peg.23rxn00509	0.284781
COMMON	fig|266834.1.peg.2451	rxn01289	fig|266834.1.peg.2451rxn01289	0.802104		COMMON	fig|266834.1.peg.2451	rxn01289	fig|266834.1.peg.2451rxn01289	0.802104
COMMON	fig|266834.1.peg.2798	rxn05381	fig|266834.1.peg.2798rxn05381	0.816663		COMMON	fig|266834.1.peg.2798	rxn05381	fig|266834.1.peg.2798rxn05381	0.816663
COMMON	fig|266834.1.peg.2798	rxn05390	fig|266834.1.peg.2798rxn05390	0.816663		COMMON	fig|266834.1.peg.2798	rxn05390	fig|266834.1.peg.2798rxn05390	0.816663
COMMON	fig|266834.1.peg.2798	rxn05402	fig|266834.1.peg.2798rxn05402	0.816663		COMMON	fig|266834.1.peg.2798	rxn05402	fig|266834.1.peg.2798rxn05402	0.816663
COMMON	fig|266834.1.peg.2798	rxn05386	fig|266834.1.peg.2798rxn05386	0.816663		COMMON	fig|266834.1.peg.2798	rxn05386	fig|266834.1.peg.2798rxn05386	0.816663
COMMON	fig|266834.1.peg.2798	rxn05394	fig|266834.1.peg.2798rxn05394	0.816663		COMMON	fig|266834.1.peg.2798	rxn05394	fig|266834.1.peg.2798rxn05394	0.816663
COMMON	fig|266834.1.peg.2798	rxn05377	fig|266834.1.peg.2798rxn05377	0.816663		COMMON	fig|266834.1.peg.2798	rxn05377	fig|266834.1.peg.2798rxn05377	0.816663
COMMON	fig|266834.1.peg.2798	rxn05398	fig|266834.1.peg.2798rxn05398	0.816663		COMMON	fig|266834.1.peg.2798	rxn05398	fig|266834.1.peg.2798rxn05398	0.816663
COMMON	fig|266834.1.peg.2798	rxn05373	fig|266834.1.peg.2798rxn05373	0.816663		COMMON	fig|266834.1.peg.2798	rxn05373	fig|266834.1.peg.2798rxn05373	0.816663
COMMON	fig|266834.1.peg.2798	rxn05369	fig|266834.1.peg.2798rxn05369	0.816663		COMMON	fig|266834.1.peg.2798	rxn05369	fig|266834.1.peg.2798rxn05369	0.816663
COMMON	fig|266834.1.peg.2798	rxn05462	fig|266834.1.peg.2798rxn05462	0.816663		COMMON	fig|266834.1.peg.2798	rxn05462	fig|266834.1.peg.2798rxn05462	0.816663
COMMON	fig|266834.1.peg.2798	rxn05406	fig|266834.1.peg.2798rxn05406	0.816663		COMMON	fig|266834.1.peg.2798	rxn05406	fig|266834.1.peg.2798rxn05406	0.816663
COMMON	fig|266834.1.peg.2798	rxn05365	fig|266834.1.peg.2798rxn05365	0.816663		COMMON	fig|266834.1.peg.2798	rxn05365	fig|266834.1.peg.2798rxn05365	0.816663
COMMON	fig|266834.1.peg.2798	rxn05361	fig|266834.1.peg.2798rxn05361	0.816663		COMMON	fig|266834.1.peg.2798	rxn05361	fig|266834.1.peg.2798rxn05361	0.816663
COMMON	fig|266834.1.peg.5586	rxn01492	fig|266834.1.peg.5586rxn01492	0.0801464		COMMON	fig|266834.1.peg.5586	rxn01492	fig|266834.1.peg.5586rxn01492	0.0801464
COMMON	fig|267608.1.peg.2145	rxn01343	fig|267608.1.peg.2145rxn01343	0.0157583		COMMON	fig|267608.1.peg.2145	rxn01343	fig|267608.1.peg.2145rxn01343	0.0157583
COMMON	fig|267608.1.peg.3310	rxn01022	fig|267608.1.peg.3310rxn01022	0.343501		COMMON	fig|267608.1.peg.3310	rxn01022	fig|267608.1.peg.3310rxn01022	0.343501
COMMON	fig|267608.1.peg.2253	rxn00994	fig|267608.1.peg.2253rxn00994	0.0110977		COMMON	fig|267608.1.peg.2253	rxn00994	fig|267608.1.peg.2253rxn00994	0.0110977
COMMON	fig|267608.1.peg.4451	rxn03856	fig|267608.1.peg.4451rxn03856	0.0687353		COMMON	fig|267608.1.peg.4451	rxn03856	fig|267608.1.peg.4451rxn03856	0.0687353
COMMON	fig|267608.1.peg.2745	rxn02929	fig|267608.1.peg.2745rxn02929	0.388889		COMMON	fig|267608.1.peg.2745	rxn02929	fig|267608.1.peg.2745rxn02929	0.388889
COMMON	fig|267608.1.peg.1767	rxn05104	fig|267608.1.peg.1767rxn05104	0.00921258		COMMON	fig|267608.1.peg.1767	rxn05104	fig|267608.1.peg.1767rxn05104	0.00921258
COMMON	fig|267608.1.peg.1749	rxn02831	fig|267608.1.peg.1749rxn02831	0.0208721		COMMON	fig|267608.1.peg.1749	rxn02831	fig|267608.1.peg.1749rxn02831	0.0208721
COMMON	fig|267608.1.peg.28	rxn00509	fig|267608.1.peg.28rxn00509	0.196531		COMMON	fig|267608.1.peg.28	rxn00509	fig|267608.1.peg.28rxn00509	0.196531
COMMON	fig|267608.1.peg.28	rxn00979	fig|267608.1.peg.28rxn00979	0.0817194		COMMON	fig|267608.1.peg.28	rxn00979	fig|267608.1.peg.28rxn00979	0.0817194
COMMON	fig|267608.1.peg.2390	rxn03540	fig|267608.1.peg.2390rxn03540	0.741265		COMMON	fig|267608.1.peg.2390	rxn03540	fig|267608.1.peg.2390rxn03540	0.741265
COMMON	fig|267608.1.peg.1406	rxn00119	fig|267608.1.peg.1406rxn00119	0.976446		COMMON	fig|267608.1.peg.1406	rxn00119	fig|267608.1.peg.1406rxn00119	0.976446
COMMON	fig|267608.1.peg.2392	rxn04384	fig|267608.1.peg.2392rxn04384	0.810821		COMMON	fig|267608.1.peg.2392	rxn04384	fig|267608.1.peg.2392rxn04384	0.810821
COMMON	fig|267608.1.peg.4064	rxn03491	fig|267608.1.peg.4064rxn03491	0.90934		COMMON	fig|267608.1.peg.4064	rxn03491	fig|267608.1.peg.4064rxn03491	0.90934
COMMON	fig|267608.1.peg.2396	rxn03538	fig|267608.1.peg.2396rxn03538	0.947984		COMMON	fig|267608.1.peg.2396	rxn03538	fig|267608.1.peg.2396rxn03538	0.947984
COMMON	fig|267608.1.peg.2398	rxn05515	fig|267608.1.peg.2398rxn05515	0.145668		COMMON	fig|267608.1.peg.2398	rxn05515	fig|267608.1.peg.2398rxn05515	0.145668
COMMON	fig|267608.1.peg.2398	rxn10147	fig|267608.1.peg.2398rxn10147	0.145668		COMMON	fig|267608.1.peg.2398	rxn10147	fig|267608.1.peg.2398rxn10147	0.145668
COMMON	fig|267608.1.peg.545	rxn01438	fig|267608.1.peg.545rxn01438	0.0305077		COMMON	fig|267608.1.peg.545	rxn01438	fig|267608.1.peg.545rxn01438	0.0305077
COMMON	fig|267608.1.peg.665	rxn01644	fig|267608.1.peg.665rxn01644	0.0241556		COMMON	fig|267608.1.peg.665	rxn01644	fig|267608.1.peg.665rxn01644	0.0241556
COMMON	fig|267608.1.peg.3759	rxn05516	fig|267608.1.peg.3759rxn05516	0.792328		COMMON	fig|267608.1.peg.3759	rxn05516	fig|267608.1.peg.3759rxn05516	0.792328
COMMON	fig|267608.1.peg.3863	rxn01990	fig|267608.1.peg.3863rxn01990	0.181874		COMMON	fig|267608.1.peg.3863	rxn01990	fig|267608.1.peg.3863rxn01990	0.181874
COMMON	fig|267608.1.peg.3863	rxn02346	fig|267608.1.peg.3863rxn02346	0.181874		COMMON	fig|267608.1.peg.3863	rxn02346	fig|267608.1.peg.3863rxn02346	0.181874
COMMON	fig|267608.1.peg.2504	rxn01109	fig|267608.1.peg.2504rxn01109	0.22706		COMMON	fig|267608.1.peg.2504	rxn01109	fig|267608.1.peg.2504rxn01109	0.22706
COMMON	fig|267608.1.peg.3672	rxn01022	fig|267608.1.peg.3672rxn01022	0.375305		COMMON	fig|267608.1.peg.3672	rxn01022	fig|267608.1.peg.3672rxn01022	0.375305
COMMON	fig|267608.1.peg.2121	rxn01523	fig|267608.1.peg.2121rxn01523	0.000456661		COMMON	fig|267608.1.peg.2121	rxn01523	fig|267608.1.peg.2121rxn01523	0.000456661
COMMON	fig|267608.1.peg.4328	rxn02366	fig|267608.1.peg.4328rxn02366	0.00160037		COMMON	fig|267608.1.peg.4328	rxn02366	fig|267608.1.peg.4328rxn02366	0.00160037
COMMON	fig|267608.1.peg.113	rxn09997	fig|267608.1.peg.113rxn09997	0.719424		COMMON	fig|267608.1.peg.113	rxn09997	fig|267608.1.peg.113rxn09997	0.719424
COMMON	fig|267608.1.peg.215	rxn03886	fig|267608.1.peg.215rxn03886	0.0166652		COMMON	fig|267608.1.peg.215	rxn03886	fig|267608.1.peg.215rxn03886	0.0166652
COMMON	fig|267608.1.peg.215	rxn01109	fig|267608.1.peg.215rxn01109	0.195516		COMMON	fig|267608.1.peg.215	rxn01109	fig|267608.1.peg.215rxn01109	0.195516
COMMON	fig|267608.1.peg.5051	rxn01203	fig|267608.1.peg.5051rxn01203	0.561837		COMMON	fig|267608.1.peg.5051	rxn01203	fig|267608.1.peg.5051rxn01203	0.561837
COMMON	fig|267608.1.peg.4501	rxn01289	fig|267608.1.peg.4501rxn01289	0.448943		COMMON	fig|267608.1.peg.4501	rxn01289	fig|267608.1.peg.4501rxn01289	0.448943
COMMON	fig|267608.1.peg.4344	rxn01279	fig|267608.1.peg.4344rxn01279	0.283569		COMMON	fig|267608.1.peg.4344	rxn01279	fig|267608.1.peg.4344rxn01279	0.283569
COMMON	fig|267608.1.peg.3251	rxn02400	fig|267608.1.peg.3251rxn02400	0.0266978		COMMON	fig|267608.1.peg.3251	rxn02400	fig|267608.1.peg.3251rxn02400	0.0266978
COMMON	fig|267608.1.peg.1145	rxn01633	fig|267608.1.peg.1145rxn01633	0.00609406		COMMON	fig|267608.1.peg.1145	rxn01633	fig|267608.1.peg.1145rxn01633	0.00609406
COMMON	fig|267608.1.peg.3151	rxn00312	fig|267608.1.peg.3151rxn00312	0.163004		COMMON	fig|267608.1.peg.3151	rxn00312	fig|267608.1.peg.3151rxn00312	0.163004
COMMON	fig|267608.1.peg.3209	rxn01094	fig|267608.1.peg.3209rxn01094	0.0127439		COMMON	fig|267608.1.peg.3209	rxn01094	fig|267608.1.peg.3209rxn01094	0.0127439
COMMON	fig|267608.1.peg.4234	rxn03086	fig|267608.1.peg.4234rxn03086	0.27458		COMMON	fig|267608.1.peg.4234	rxn03086	fig|267608.1.peg.4234rxn03086	0.27458
COMMON	fig|267608.1.peg.4424	rxn03075	fig|267608.1.peg.4424rxn03075	0.00149309		COMMON	fig|267608.1.peg.4424	rxn03075	fig|267608.1.peg.4424rxn03075	0.00149309
COMMON	fig|267608.1.peg.1824	rxn03041	fig|267608.1.peg.1824rxn03041	0.118811		COMMON	fig|267608.1.peg.1824	rxn03041	fig|267608.1.peg.1824rxn03041	0.118811
COMMON	fig|267608.1.peg.704	rxn01630	fig|267608.1.peg.704rxn01630	0.195522		COMMON	fig|267608.1.peg.704	rxn01630	fig|267608.1.peg.704rxn01630	0.195522
COMMON	fig|267608.1.peg.3201	rxn01094	fig|267608.1.peg.3201rxn01094	0.0149212		COMMON	fig|267608.1.peg.3201	rxn01094	fig|267608.1.peg.3201rxn01094	0.0149212
COMMON	fig|267608.1.peg.104	rxn03167	fig|267608.1.peg.104rxn03167	0.805761		COMMON	fig|267608.1.peg.104	rxn03167	fig|267608.1.peg.104rxn03167	0.805761
COMMON	fig|267608.1.peg.1772	rxn01022	fig|267608.1.peg.1772rxn01022	0.42872		COMMON	fig|267608.1.peg.1772	rxn01022	fig|267608.1.peg.1772rxn01022	0.42872
COMMON	fig|267608.1.peg.2871	rxn01972	fig|267608.1.peg.2871rxn01972	0.766805		COMMON	fig|267608.1.peg.2871	rxn01972	fig|267608.1.peg.2871rxn01972	0.766805
COMMON	fig|267608.1.peg.1415	rxn05381	fig|267608.1.peg.1415rxn05381	0.726548		COMMON	fig|267608.1.peg.1415	rxn05381	fig|267608.1.peg.1415rxn05381	0.726548
COMMON	fig|267608.1.peg.1415	rxn05390	fig|267608.1.peg.1415rxn05390	0.726548		COMMON	fig|267608.1.peg.1415	rxn05390	fig|267608.1.peg.1415rxn05390	0.726548
COMMON	fig|267608.1.peg.1415	rxn05402	fig|267608.1.peg.1415rxn05402	0.726548		COMMON	fig|267608.1.peg.1415	rxn05402	fig|267608.1.peg.1415rxn05402	0.726548
COMMON	fig|267608.1.peg.1415	rxn05386	fig|267608.1.peg.1415rxn05386	0.726548		COMMON	fig|267608.1.peg.1415	rxn05386	fig|267608.1.peg.1415rxn05386	0.726548
COMMON	fig|267608.1.peg.1415	rxn05394	fig|267608.1.peg.1415rxn05394	0.726548		COMMON	fig|267608.1.peg.1415	rxn05394	fig|267608.1.peg.1415rxn05394	0.726548
COMMON	fig|267608.1.peg.1415	rxn05377	fig|267608.1.peg.1415rxn05377	0.726548		COMMON	fig|267608.1.peg.1415	rxn05377	fig|267608.1.peg.1415rxn05377	0.726548
COMMON	fig|267608.1.peg.1415	rxn05398	fig|267608.1.peg.1415rxn05398	0.726548		COMMON	fig|267608.1.peg.1415	rxn05398	fig|267608.1.peg.1415rxn05398	0.726548
COMMON	fig|267608.1.peg.1415	rxn05332	fig|267608.1.peg.1415rxn05332	0.726548		COMMON	fig|267608.1.peg.1415	rxn05332	fig|267608.1.peg.1415rxn05332	0.726548
COMMON	fig|267608.1.peg.1415	rxn05373	fig|267608.1.peg.1415rxn05373	0.726548		COMMON	fig|267608.1.peg.1415	rxn05373	fig|267608.1.peg.1415rxn05373	0.726548
COMMON	fig|267608.1.peg.1415	rxn05369	fig|267608.1.peg.1415rxn05369	0.726548		COMMON	fig|267608.1.peg.1415	rxn05369	fig|267608.1.peg.1415rxn05369	0.726548
COMMON	fig|267608.1.peg.1415	rxn05331	fig|267608.1.peg.1415rxn05331	0.726548		COMMON	fig|267608.1.peg.1415	rxn05331	fig|267608.1.peg.1415rxn05331	0.726548
COMMON	fig|267608.1.peg.1415	rxn05330	fig|267608.1.peg.1415rxn05330	0.726548		COMMON	fig|267608.1.peg.1415	rxn05330	fig|267608.1.peg.1415rxn05330	0.726548
COMMON	fig|267608.1.peg.1415	rxn05333	fig|267608.1.peg.1415rxn05333	0.726548		COMMON	fig|267608.1.peg.1415	rxn05333	fig|267608.1.peg.1415rxn05333	0.726548
COMMON	fig|267608.1.peg.1415	rxn05462	fig|267608.1.peg.1415rxn05462	0.726548		COMMON	fig|267608.1.peg.1415	rxn05462	fig|267608.1.peg.1415rxn05462	0.726548
COMMON	fig|267608.1.peg.1415	rxn05334	fig|267608.1.peg.1415rxn05334	0.726548		COMMON	fig|267608.1.peg.1415	rxn05334	fig|267608.1.peg.1415rxn05334	0.726548
COMMON	fig|267608.1.peg.1415	rxn05329	fig|267608.1.peg.1415rxn05329	0.726548		COMMON	fig|267608.1.peg.1415	rxn05329	fig|267608.1.peg.1415rxn05329	0.726548
COMMON	fig|267608.1.peg.1415	rxn05406	fig|267608.1.peg.1415rxn05406	0.726548		COMMON	fig|267608.1.peg.1415	rxn05406	fig|267608.1.peg.1415rxn05406	0.726548
COMMON	fig|267608.1.peg.1415	rxn05365	fig|267608.1.peg.1415rxn05365	0.726548		COMMON	fig|267608.1.peg.1415	rxn05365	fig|267608.1.peg.1415rxn05365	0.726548
COMMON	fig|267608.1.peg.1415	rxn05361	fig|267608.1.peg.1415rxn05361	0.726548		COMMON	fig|267608.1.peg.1415	rxn05361	fig|267608.1.peg.1415rxn05361	0.726548
COMMON	fig|267608.1.peg.3991	rxn01640	fig|267608.1.peg.3991rxn01640	0.00852005		COMMON	fig|267608.1.peg.3991	rxn01640	fig|267608.1.peg.3991rxn01640	0.00852005
COMMON	fig|267608.1.peg.4058	rxn03513	fig|267608.1.peg.4058rxn03513	0.970267		COMMON	fig|267608.1.peg.4058	rxn03513	fig|267608.1.peg.4058rxn03513	0.970267
COMMON	fig|267608.1.peg.4058	rxn04047	fig|267608.1.peg.4058rxn04047	0.970267		COMMON	fig|267608.1.peg.4058	rxn04047	fig|267608.1.peg.4058rxn04047	0.970267
COMMON	fig|267608.1.peg.4058	rxn03492	fig|267608.1.peg.4058rxn03492	0.438075		COMMON	fig|267608.1.peg.4058	rxn03492	fig|267608.1.peg.4058rxn03492	0.438075
COMMON	fig|267608.1.peg.4058	rxn04050	fig|267608.1.peg.4058rxn04050	0.438075		COMMON	fig|267608.1.peg.4058	rxn04050	fig|267608.1.peg.4058rxn04050	0.438075
COMMON	fig|267608.1.peg.1730	rxn05416	fig|267608.1.peg.1730rxn05416	0.272245		COMMON	fig|267608.1.peg.1730	rxn05416	fig|267608.1.peg.1730rxn05416	0.272245
COMMON	fig|267608.1.peg.1730	rxn05412	fig|267608.1.peg.1730rxn05412	0.272245		COMMON	fig|267608.1.peg.1730	rxn05412	fig|267608.1.peg.1730rxn05412	0.272245
COMMON	fig|267608.1.peg.1730	rxn05357	fig|267608.1.peg.1730rxn05357	0.272245		COMMON	fig|267608.1.peg.1730	rxn05357	fig|267608.1.peg.1730rxn05357	0.272245
COMMON	fig|267608.1.peg.1730	rxn05353	fig|267608.1.peg.1730rxn05353	0.272245		COMMON	fig|267608.1.peg.1730	rxn05353	fig|267608.1.peg.1730rxn05353	0.272245
COMMON	fig|267608.1.peg.1730	rxn05352	fig|267608.1.peg.1730rxn05352	0.272245		COMMON	fig|267608.1.peg.1730	rxn05352	fig|267608.1.peg.1730rxn05352	0.272245
COMMON	fig|267608.1.peg.1730	rxn05351	fig|267608.1.peg.1730rxn05351	0.272245		COMMON	fig|267608.1.peg.1730	rxn05351	fig|267608.1.peg.1730rxn05351	0.272245
COMMON	fig|267608.1.peg.1730	rxn05432	fig|267608.1.peg.1730rxn05432	0.272245		COMMON	fig|267608.1.peg.1730	rxn05432	fig|267608.1.peg.1730rxn05432	0.272245
COMMON	fig|267608.1.peg.1730	rxn05424	fig|267608.1.peg.1730rxn05424	0.272245		COMMON	fig|267608.1.peg.1730	rxn05424	fig|267608.1.peg.1730rxn05424	0.272245
COMMON	fig|267608.1.peg.1730	rxn05420	fig|267608.1.peg.1730rxn05420	0.272245		COMMON	fig|267608.1.peg.1730	rxn05420	fig|267608.1.peg.1730rxn05420	0.272245
COMMON	fig|267608.1.peg.1730	rxn05428	fig|267608.1.peg.1730rxn05428	0.272245		COMMON	fig|267608.1.peg.1730	rxn05428	fig|267608.1.peg.1730rxn05428	0.272245
COMMON	fig|267608.1.peg.1537	rxn02449	fig|267608.1.peg.1537rxn02449	0.0979025		COMMON	fig|267608.1.peg.1537	rxn02449	fig|267608.1.peg.1537rxn02449	0.0979025
COMMON	fig|267608.1.peg.2872	rxn02168	fig|267608.1.peg.2872rxn02168	0.315588		COMMON	fig|267608.1.peg.2872	rxn02168	fig|267608.1.peg.2872rxn02168	0.315588
COMMON	fig|267608.1.peg.5049	rxn00509	fig|267608.1.peg.5049rxn00509	0.187726		COMMON	fig|267608.1.peg.5049	rxn00509	fig|267608.1.peg.5049rxn00509	0.187726
COMMON	fig|267608.1.peg.4119	rxn00313	fig|267608.1.peg.4119rxn00313	0.805733		COMMON	fig|267608.1.peg.4119	rxn00313	fig|267608.1.peg.4119rxn00313	0.805733
COMMON	fig|267608.1.peg.4055	rxn06979	fig|267608.1.peg.4055rxn06979	0.990791		COMMON	fig|267608.1.peg.4055	rxn06979	fig|267608.1.peg.4055rxn06979	0.990791
COMMON	fig|267608.1.peg.4055	rxn11544	fig|267608.1.peg.4055rxn11544	0.990791		COMMON	fig|267608.1.peg.4055	rxn11544	fig|267608.1.peg.4055rxn11544	0.990791
COMMON	fig|267608.1.peg.4131	rxn01825	fig|267608.1.peg.4131rxn01825	0.981028		COMMON	fig|267608.1.peg.4131	rxn01825	fig|267608.1.peg.4131rxn01825	0.981028
COMMON	fig|267608.1.peg.4130	rxn00993	fig|267608.1.peg.4130rxn00993	0.991581		COMMON	fig|267608.1.peg.4130	rxn00993	fig|267608.1.peg.4130rxn00993	0.991581
COMMON	fig|267608.1.peg.2511	rxn01972	fig|267608.1.peg.2511rxn01972	0.845482		COMMON	fig|267608.1.peg.2511	rxn01972	fig|267608.1.peg.2511rxn01972	0.845482
COMMON	fig|267608.1.peg.458	rxn03397	fig|267608.1.peg.458rxn03397	0.85835		COMMON	fig|267608.1.peg.458	rxn03397	fig|267608.1.peg.458rxn03397	0.85835
COMMON	fig|267608.1.peg.458	rxn10094	fig|267608.1.peg.458rxn10094	0.85835		COMMON	fig|267608.1.peg.458	rxn10094	fig|267608.1.peg.458rxn10094	0.85835
COMMON	fig|267608.1.peg.3665	rxn02898	fig|267608.1.peg.3665rxn02898	0.131077		COMMON	fig|267608.1.peg.3665	rxn02898	fig|267608.1.peg.3665rxn02898	0.131077
COMMON	fig|267608.1.peg.3640	rxn00856	fig|267608.1.peg.3640rxn00856	0.28938		COMMON	fig|267608.1.peg.3640	rxn00856	fig|267608.1.peg.3640rxn00856	0.28938
COMMON	fig|267608.1.peg.102	rxn03167	fig|267608.1.peg.102rxn03167	0.93572		COMMON	fig|267608.1.peg.102	rxn03167	fig|267608.1.peg.102rxn03167	0.93572
COMMON	fig|267608.1.peg.283	rxn05515	fig|267608.1.peg.283rxn05515	0.897335		COMMON	fig|267608.1.peg.283	rxn05515	fig|267608.1.peg.283rxn05515	0.897335
COMMON	fig|267608.1.peg.283	rxn10147	fig|267608.1.peg.283rxn10147	0.897335		COMMON	fig|267608.1.peg.283	rxn10147	fig|267608.1.peg.283rxn10147	0.897335
COMMON	fig|267608.1.peg.1591	rxn01203	fig|267608.1.peg.1591rxn01203	0.575799		COMMON	fig|267608.1.peg.1591	rxn01203	fig|267608.1.peg.1591rxn01203	0.575799
COMMON	fig|267608.1.peg.4330	rxn03055	fig|267608.1.peg.4330rxn03055	0.455384		COMMON	fig|267608.1.peg.4330	rxn03055	fig|267608.1.peg.4330rxn03055	0.455384
COMMON	fig|267608.1.peg.3346	rxn05528	fig|267608.1.peg.3346rxn05528	0.924417		COMMON	fig|267608.1.peg.3346	rxn05528	fig|267608.1.peg.3346rxn05528	0.924417
COMMON	fig|267608.1.peg.3346	rxn05516	fig|267608.1.peg.3346rxn05516	0.882902		COMMON	fig|267608.1.peg.3346	rxn05516	fig|267608.1.peg.3346rxn05516	0.882902
COMMON	fig|267608.1.peg.4447	rxn03030	fig|267608.1.peg.4447rxn03030	0.679953		COMMON	fig|267608.1.peg.4447	rxn03030	fig|267608.1.peg.4447rxn03030	0.679953
COMMON	fig|267608.1.peg.511	rxn00695	fig|267608.1.peg.511rxn00695	0.000952601		COMMON	fig|267608.1.peg.511	rxn00695	fig|267608.1.peg.511rxn00695	0.000952601
COMMON	fig|269483.3.peg.7540	rxn03397	fig|269483.3.peg.7540rxn03397	0.853059		COMMON	fig|269483.3.peg.7540	rxn03397	fig|269483.3.peg.7540rxn03397	0.853059
COMMON	fig|269483.3.peg.7540	rxn10094	fig|269483.3.peg.7540rxn10094	0.853059		COMMON	fig|269483.3.peg.7540	rxn10094	fig|269483.3.peg.7540rxn10094	0.853059
COMMON	fig|269483.3.peg.6655	rxn05381	fig|269483.3.peg.6655rxn05381	0.728723		COMMON	fig|269483.3.peg.6655	rxn05381	fig|269483.3.peg.6655rxn05381	0.728723
COMMON	fig|269483.3.peg.6655	rxn05390	fig|269483.3.peg.6655rxn05390	0.728723		COMMON	fig|269483.3.peg.6655	rxn05390	fig|269483.3.peg.6655rxn05390	0.728723
COMMON	fig|269483.3.peg.6655	rxn05402	fig|269483.3.peg.6655rxn05402	0.728723		COMMON	fig|269483.3.peg.6655	rxn05402	fig|269483.3.peg.6655rxn05402	0.728723
COMMON	fig|269483.3.peg.6655	rxn05386	fig|269483.3.peg.6655rxn05386	0.728723		COMMON	fig|269483.3.peg.6655	rxn05386	fig|269483.3.peg.6655rxn05386	0.728723
COMMON	fig|269483.3.peg.6655	rxn05394	fig|269483.3.peg.6655rxn05394	0.728723		COMMON	fig|269483.3.peg.6655	rxn05394	fig|269483.3.peg.6655rxn05394	0.728723
COMMON	fig|269483.3.peg.6655	rxn05377	fig|269483.3.peg.6655rxn05377	0.728723		COMMON	fig|269483.3.peg.6655	rxn05377	fig|269483.3.peg.6655rxn05377	0.728723
COMMON	fig|269483.3.peg.6655	rxn05398	fig|269483.3.peg.6655rxn05398	0.728723		COMMON	fig|269483.3.peg.6655	rxn05398	fig|269483.3.peg.6655rxn05398	0.728723
COMMON	fig|269483.3.peg.6655	rxn05332	fig|269483.3.peg.6655rxn05332	0.728723		COMMON	fig|269483.3.peg.6655	rxn05332	fig|269483.3.peg.6655rxn05332	0.728723
COMMON	fig|269483.3.peg.6655	rxn05373	fig|269483.3.peg.6655rxn05373	0.728723		COMMON	fig|269483.3.peg.6655	rxn05373	fig|269483.3.peg.6655rxn05373	0.728723
COMMON	fig|269483.3.peg.6655	rxn05369	fig|269483.3.peg.6655rxn05369	0.728723		COMMON	fig|269483.3.peg.6655	rxn05369	fig|269483.3.peg.6655rxn05369	0.728723
COMMON	fig|269483.3.peg.6655	rxn05331	fig|269483.3.peg.6655rxn05331	0.728723		COMMON	fig|269483.3.peg.6655	rxn05331	fig|269483.3.peg.6655rxn05331	0.728723
COMMON	fig|269483.3.peg.6655	rxn05330	fig|269483.3.peg.6655rxn05330	0.728723		COMMON	fig|269483.3.peg.6655	rxn05330	fig|269483.3.peg.6655rxn05330	0.728723
COMMON	fig|269483.3.peg.6655	rxn05333	fig|269483.3.peg.6655rxn05333	0.728723		COMMON	fig|269483.3.peg.6655	rxn05333	fig|269483.3.peg.6655rxn05333	0.728723
COMMON	fig|269483.3.peg.6655	rxn05462	fig|269483.3.peg.6655rxn05462	0.728723		COMMON	fig|269483.3.peg.6655	rxn05462	fig|269483.3.peg.6655rxn05462	0.728723
COMMON	fig|269483.3.peg.6655	rxn05335	fig|269483.3.peg.6655rxn05335	0.728723		COMMON	fig|269483.3.peg.6655	rxn05335	fig|269483.3.peg.6655rxn05335	0.728723
COMMON	fig|269483.3.peg.6655	rxn05334	fig|269483.3.peg.6655rxn05334	0.728723		COMMON	fig|269483.3.peg.6655	rxn05334	fig|269483.3.peg.6655rxn05334	0.728723
COMMON	fig|269483.3.peg.6655	rxn05329	fig|269483.3.peg.6655rxn05329	0.728723		COMMON	fig|269483.3.peg.6655	rxn05329	fig|269483.3.peg.6655rxn05329	0.728723
COMMON	fig|269483.3.peg.6655	rxn05406	fig|269483.3.peg.6655rxn05406	0.728723		COMMON	fig|269483.3.peg.6655	rxn05406	fig|269483.3.peg.6655rxn05406	0.728723
COMMON	fig|269483.3.peg.6655	rxn05365	fig|269483.3.peg.6655rxn05365	0.728723		COMMON	fig|269483.3.peg.6655	rxn05365	fig|269483.3.peg.6655rxn05365	0.728723
COMMON	fig|269483.3.peg.6655	rxn05361	fig|269483.3.peg.6655rxn05361	0.728723		COMMON	fig|269483.3.peg.6655	rxn05361	fig|269483.3.peg.6655rxn05361	0.728723
COMMON	fig|269483.3.peg.2328	rxn01670	fig|269483.3.peg.2328rxn01670	0.3246		COMMON	fig|269483.3.peg.2328	rxn01670	fig|269483.3.peg.2328rxn01670	0.3246
COMMON	fig|269483.3.peg.2328	rxn02400	fig|269483.3.peg.2328rxn02400	0.3246		COMMON	fig|269483.3.peg.2328	rxn02400	fig|269483.3.peg.2328rxn02400	0.3246
COMMON	fig|269483.3.peg.6514	rxn03513	fig|269483.3.peg.6514rxn03513	0.977741		COMMON	fig|269483.3.peg.6514	rxn03513	fig|269483.3.peg.6514rxn03513	0.977741
COMMON	fig|269483.3.peg.6514	rxn04047	fig|269483.3.peg.6514rxn04047	0.977741		COMMON	fig|269483.3.peg.6514	rxn04047	fig|269483.3.peg.6514rxn04047	0.977741
COMMON	fig|269483.3.peg.4838	rxn01329	fig|269483.3.peg.4838rxn01329	0.63778		COMMON	fig|269483.3.peg.4838	rxn01329	fig|269483.3.peg.4838rxn01329	0.63778
COMMON	fig|269483.3.peg.4838	rxn00704	fig|269483.3.peg.4838rxn00704	0.429912		COMMON	fig|269483.3.peg.4838	rxn00704	fig|269483.3.peg.4838rxn00704	0.429912
COMMON	fig|269483.3.peg.3845	rxn02304	fig|269483.3.peg.3845rxn02304	0.000188018		COMMON	fig|269483.3.peg.3845	rxn02304	fig|269483.3.peg.3845rxn02304	0.000188018
COMMON	fig|269483.3.peg.5433	rxn09997	fig|269483.3.peg.5433rxn09997	0.739408		COMMON	fig|269483.3.peg.5433	rxn09997	fig|269483.3.peg.5433rxn09997	0.739408
COMMON	fig|269483.3.peg.3414	rxn03898	fig|269483.3.peg.3414rxn03898	0.721087		COMMON	fig|269483.3.peg.3414	rxn03898	fig|269483.3.peg.3414rxn03898	0.721087
COMMON	fig|269483.3.peg.1773	rxn01203	fig|269483.3.peg.1773rxn01203	0.567839		COMMON	fig|269483.3.peg.1773	rxn01203	fig|269483.3.peg.1773rxn01203	0.567839
COMMON	fig|269483.3.peg.1657	rxn00933	fig|269483.3.peg.1657rxn00933	0.22528		COMMON	fig|269483.3.peg.1657	rxn00933	fig|269483.3.peg.1657rxn00933	0.22528
COMMON	fig|269483.3.peg.7008	rxn00589	fig|269483.3.peg.7008rxn00589	0.713696		COMMON	fig|269483.3.peg.7008	rxn00589	fig|269483.3.peg.7008rxn00589	0.713696
COMMON	fig|269483.3.peg.5723	rxn05515	fig|269483.3.peg.5723rxn05515	0.313968		COMMON	fig|269483.3.peg.5723	rxn05515	fig|269483.3.peg.5723rxn05515	0.313968
COMMON	fig|269483.3.peg.5723	rxn10147	fig|269483.3.peg.5723rxn10147	0.313968		COMMON	fig|269483.3.peg.5723	rxn10147	fig|269483.3.peg.5723rxn10147	0.313968
COMMON	fig|269483.3.peg.987	rxn01620	fig|269483.3.peg.987rxn01620	0.25392		COMMON	fig|269483.3.peg.987	rxn01620	fig|269483.3.peg.987rxn01620	0.25392
COMMON	fig|269483.3.peg.768	rxn01620	fig|269483.3.peg.768rxn01620	0.273123		COMMON	fig|269483.3.peg.768	rxn01620	fig|269483.3.peg.768rxn01620	0.273123
COMMON	fig|269483.3.peg.2936	rxn01022	fig|269483.3.peg.2936rxn01022	0.452811		COMMON	fig|269483.3.peg.2936	rxn01022	fig|269483.3.peg.2936rxn01022	0.452811
COMMON	fig|269483.3.peg.3967	rxn00993	fig|269483.3.peg.3967rxn00993	0.983342		COMMON	fig|269483.3.peg.3967	rxn00993	fig|269483.3.peg.3967rxn00993	0.983342
COMMON	fig|269483.3.peg.7405	rxn02314	fig|269483.3.peg.7405rxn02314	0.0734128		COMMON	fig|269483.3.peg.7405	rxn02314	fig|269483.3.peg.7405rxn02314	0.0734128
COMMON	fig|269483.3.peg.7405	rxn01343	fig|269483.3.peg.7405rxn01343	0.0167977		COMMON	fig|269483.3.peg.7405	rxn01343	fig|269483.3.peg.7405rxn01343	0.0167977
COMMON	fig|269483.3.peg.4360	rxn01644	fig|269483.3.peg.4360rxn01644	0.532968		COMMON	fig|269483.3.peg.4360	rxn01644	fig|269483.3.peg.4360rxn01644	0.532968
COMMON	fig|269483.3.peg.5513	rxn00601	fig|269483.3.peg.5513rxn00601	0.800102		COMMON	fig|269483.3.peg.5513	rxn00601	fig|269483.3.peg.5513rxn00601	0.800102
COMMON	fig|269483.3.peg.6616	rxn03540	fig|269483.3.peg.6616rxn03540	0.743021		COMMON	fig|269483.3.peg.6616	rxn03540	fig|269483.3.peg.6616rxn03540	0.743021
COMMON	fig|269483.3.peg.2916	rxn01438	fig|269483.3.peg.2916rxn01438	0.00780647		COMMON	fig|269483.3.peg.2916	rxn01438	fig|269483.3.peg.2916rxn01438	0.00780647
COMMON	fig|269483.3.peg.7521	rxn00641	fig|269483.3.peg.7521rxn00641	0.103969		COMMON	fig|269483.3.peg.7521	rxn00641	fig|269483.3.peg.7521rxn00641	0.103969
COMMON	fig|269483.3.peg.6670	rxn00119	fig|269483.3.peg.6670rxn00119	0.976659		COMMON	fig|269483.3.peg.6670	rxn00119	fig|269483.3.peg.6670rxn00119	0.976659
COMMON	fig|269483.3.peg.6822	rxn05054	fig|269483.3.peg.6822rxn05054	0.836012		COMMON	fig|269483.3.peg.6822	rxn05054	fig|269483.3.peg.6822rxn05054	0.836012
COMMON	fig|269483.3.peg.6550	rxn05416	fig|269483.3.peg.6550rxn05416	0.482113		COMMON	fig|269483.3.peg.6550	rxn05416	fig|269483.3.peg.6550rxn05416	0.482113
COMMON	fig|269483.3.peg.6550	rxn05412	fig|269483.3.peg.6550rxn05412	0.482113		COMMON	fig|269483.3.peg.6550	rxn05412	fig|269483.3.peg.6550rxn05412	0.482113
COMMON	fig|269483.3.peg.6550	rxn05357	fig|269483.3.peg.6550rxn05357	0.482113		COMMON	fig|269483.3.peg.6550	rxn05357	fig|269483.3.peg.6550rxn05357	0.482113
COMMON	fig|269483.3.peg.6550	rxn05353	fig|269483.3.peg.6550rxn05353	0.482113		COMMON	fig|269483.3.peg.6550	rxn05353	fig|269483.3.peg.6550rxn05353	0.482113
COMMON	fig|269483.3.peg.6550	rxn05428	fig|269483.3.peg.6550rxn05428	0.482113		COMMON	fig|269483.3.peg.6550	rxn05428	fig|269483.3.peg.6550rxn05428	0.482113
COMMON	fig|269483.3.peg.6550	rxn05432	fig|269483.3.peg.6550rxn05432	0.482113		COMMON	fig|269483.3.peg.6550	rxn05432	fig|269483.3.peg.6550rxn05432	0.482113
COMMON	fig|269483.3.peg.6550	rxn05424	fig|269483.3.peg.6550rxn05424	0.482113		COMMON	fig|269483.3.peg.6550	rxn05424	fig|269483.3.peg.6550rxn05424	0.482113
COMMON	fig|269483.3.peg.6550	rxn05420	fig|269483.3.peg.6550rxn05420	0.482113		COMMON	fig|269483.3.peg.6550	rxn05420	fig|269483.3.peg.6550rxn05420	0.482113
COMMON	fig|269483.3.peg.6550	rxn05352	fig|269483.3.peg.6550rxn05352	0.482113		COMMON	fig|269483.3.peg.6550	rxn05352	fig|269483.3.peg.6550rxn05352	0.482113
COMMON	fig|269483.3.peg.2818	rxn00509	fig|269483.3.peg.2818rxn00509	0.178175		COMMON	fig|269483.3.peg.2818	rxn00509	fig|269483.3.peg.2818rxn00509	0.178175
COMMON	fig|269483.3.peg.1921	rxn00751	fig|269483.3.peg.1921rxn00751	0.0231087		COMMON	fig|269483.3.peg.1921	rxn00751	fig|269483.3.peg.1921rxn00751	0.0231087
COMMON	fig|269483.3.peg.3029	rxn03168	fig|269483.3.peg.3029rxn03168	0.0514711		COMMON	fig|269483.3.peg.3029	rxn03168	fig|269483.3.peg.3029rxn03168	0.0514711
COMMON	fig|269483.3.peg.6519	rxn03491	fig|269483.3.peg.6519rxn03491	0.974348		COMMON	fig|269483.3.peg.6519	rxn03491	fig|269483.3.peg.6519rxn03491	0.974348
COMMON	fig|269483.3.peg.960	rxn02898	fig|269483.3.peg.960rxn02898	0.248162		COMMON	fig|269483.3.peg.960	rxn02898	fig|269483.3.peg.960rxn02898	0.248162
COMMON	fig|269483.3.peg.2585	rxn01670	fig|269483.3.peg.2585rxn01670	0.31043		COMMON	fig|269483.3.peg.2585	rxn01670	fig|269483.3.peg.2585rxn01670	0.31043
COMMON	fig|269483.3.peg.2585	rxn02400	fig|269483.3.peg.2585rxn02400	0.31043		COMMON	fig|269483.3.peg.2585	rxn02400	fig|269483.3.peg.2585rxn02400	0.31043
COMMON	fig|269483.3.peg.4676	rxn00993	fig|269483.3.peg.4676rxn00993	0.991635		COMMON	fig|269483.3.peg.4676	rxn00993	fig|269483.3.peg.4676rxn00993	0.991635
COMMON	fig|269483.3.peg.3413	rxn03898	fig|269483.3.peg.3413rxn03898	0.805433		COMMON	fig|269483.3.peg.3413	rxn03898	fig|269483.3.peg.3413rxn03898	0.805433
COMMON	fig|269483.3.peg.6492	rxn06979	fig|269483.3.peg.6492rxn06979	0.992702		COMMON	fig|269483.3.peg.6492	rxn06979	fig|269483.3.peg.6492rxn06979	0.992702
COMMON	fig|269483.3.peg.6492	rxn11544	fig|269483.3.peg.6492rxn11544	0.992702		COMMON	fig|269483.3.peg.6492	rxn11544	fig|269483.3.peg.6492rxn11544	0.992702
COMMON	fig|269483.3.peg.2310	rxn08618	fig|269483.3.peg.2310rxn08618	0.195514		COMMON	fig|269483.3.peg.2310	rxn08618	fig|269483.3.peg.2310rxn08618	0.195514
COMMON	fig|269483.3.peg.292	rxn09128	fig|269483.3.peg.292rxn09128	0.00128644		COMMON	fig|269483.3.peg.292	rxn09128	fig|269483.3.peg.292rxn09128	0.00128644
COMMON	fig|269483.3.peg.292	rxn09129	fig|269483.3.peg.292rxn09129	0.00128644		COMMON	fig|269483.3.peg.292	rxn09129	fig|269483.3.peg.292rxn09129	0.00128644
COMMON	fig|269483.3.peg.292	rxn09160	fig|269483.3.peg.292rxn09160	0.00128644		COMMON	fig|269483.3.peg.292	rxn09160	fig|269483.3.peg.292rxn09160	0.00128644
COMMON	fig|269483.3.peg.292	rxn09161	fig|269483.3.peg.292rxn09161	0.00128644		COMMON	fig|269483.3.peg.292	rxn09161	fig|269483.3.peg.292rxn09161	0.00128644
COMMON	fig|269483.3.peg.292	rxn09162	fig|269483.3.peg.292rxn09162	0.00128644		COMMON	fig|269483.3.peg.292	rxn09162	fig|269483.3.peg.292rxn09162	0.00128644
COMMON	fig|269483.3.peg.292	rxn09163	fig|269483.3.peg.292rxn09163	0.00128644		COMMON	fig|269483.3.peg.292	rxn09163	fig|269483.3.peg.292rxn09163	0.00128644
COMMON	fig|269483.3.peg.292	rxn09123	fig|269483.3.peg.292rxn09123	0.00128644		COMMON	fig|269483.3.peg.292	rxn09123	fig|269483.3.peg.292rxn09123	0.00128644
COMMON	fig|269483.3.peg.292	rxn09124	fig|269483.3.peg.292rxn09124	0.00128644		COMMON	fig|269483.3.peg.292	rxn09124	fig|269483.3.peg.292rxn09124	0.00128644
COMMON	fig|269483.3.peg.292	rxn09125	fig|269483.3.peg.292rxn09125	0.00128644		COMMON	fig|269483.3.peg.292	rxn09125	fig|269483.3.peg.292rxn09125	0.00128644
COMMON	fig|269483.3.peg.292	rxn09126	fig|269483.3.peg.292rxn09126	0.00128644		COMMON	fig|269483.3.peg.292	rxn09126	fig|269483.3.peg.292rxn09126	0.00128644
COMMON	fig|269483.3.peg.292	rxn09127	fig|269483.3.peg.292rxn09127	0.00128644		COMMON	fig|269483.3.peg.292	rxn09127	fig|269483.3.peg.292rxn09127	0.00128644
COMMON	fig|269483.3.peg.292	rxn09164	fig|269483.3.peg.292rxn09164	0.00128644		COMMON	fig|269483.3.peg.292	rxn09164	fig|269483.3.peg.292rxn09164	0.00128644
COMMON	fig|269483.3.peg.292	rxn09159	fig|269483.3.peg.292rxn09159	0.00128644		COMMON	fig|269483.3.peg.292	rxn09159	fig|269483.3.peg.292rxn09159	0.00128644
COMMON	fig|269483.3.peg.292	rxn09158	fig|269483.3.peg.292rxn09158	0.00128644		COMMON	fig|269483.3.peg.292	rxn09158	fig|269483.3.peg.292rxn09158	0.00128644
COMMON	fig|269483.3.peg.292	rxn09155	fig|269483.3.peg.292rxn09155	0.00128644		COMMON	fig|269483.3.peg.292	rxn09155	fig|269483.3.peg.292rxn09155	0.00128644
COMMON	fig|269483.3.peg.292	rxn09154	fig|269483.3.peg.292rxn09154	0.00128644		COMMON	fig|269483.3.peg.292	rxn09154	fig|269483.3.peg.292rxn09154	0.00128644
COMMON	fig|269483.3.peg.292	rxn09157	fig|269483.3.peg.292rxn09157	0.00128644		COMMON	fig|269483.3.peg.292	rxn09157	fig|269483.3.peg.292rxn09157	0.00128644
COMMON	fig|269483.3.peg.292	rxn09151	fig|269483.3.peg.292rxn09151	0.00128644		COMMON	fig|269483.3.peg.292	rxn09151	fig|269483.3.peg.292rxn09151	0.00128644
COMMON	fig|269483.3.peg.292	rxn09150	fig|269483.3.peg.292rxn09150	0.00128644		COMMON	fig|269483.3.peg.292	rxn09150	fig|269483.3.peg.292rxn09150	0.00128644
COMMON	fig|269483.3.peg.292	rxn09153	fig|269483.3.peg.292rxn09153	0.00128644		COMMON	fig|269483.3.peg.292	rxn09153	fig|269483.3.peg.292rxn09153	0.00128644
COMMON	fig|269483.3.peg.292	rxn09152	fig|269483.3.peg.292rxn09152	0.00128644		COMMON	fig|269483.3.peg.292	rxn09152	fig|269483.3.peg.292rxn09152	0.00128644
COMMON	fig|269483.3.peg.292	rxn09139	fig|269483.3.peg.292rxn09139	0.00128644		COMMON	fig|269483.3.peg.292	rxn09139	fig|269483.3.peg.292rxn09139	0.00128644
COMMON	fig|269483.3.peg.292	rxn09138	fig|269483.3.peg.292rxn09138	0.00128644		COMMON	fig|269483.3.peg.292	rxn09138	fig|269483.3.peg.292rxn09138	0.00128644
COMMON	fig|269483.3.peg.292	rxn09133	fig|269483.3.peg.292rxn09133	0.00128644		COMMON	fig|269483.3.peg.292	rxn09133	fig|269483.3.peg.292rxn09133	0.00128644
COMMON	fig|269483.3.peg.292	rxn09132	fig|269483.3.peg.292rxn09132	0.00128644		COMMON	fig|269483.3.peg.292	rxn09132	fig|269483.3.peg.292rxn09132	0.00128644
COMMON	fig|269483.3.peg.292	rxn09131	fig|269483.3.peg.292rxn09131	0.00128644		COMMON	fig|269483.3.peg.292	rxn09131	fig|269483.3.peg.292rxn09131	0.00128644
COMMON	fig|269483.3.peg.292	rxn09130	fig|269483.3.peg.292rxn09130	0.00128644		COMMON	fig|269483.3.peg.292	rxn09130	fig|269483.3.peg.292rxn09130	0.00128644
COMMON	fig|269483.3.peg.292	rxn09137	fig|269483.3.peg.292rxn09137	0.00128644		COMMON	fig|269483.3.peg.292	rxn09137	fig|269483.3.peg.292rxn09137	0.00128644
COMMON	fig|269483.3.peg.292	rxn09136	fig|269483.3.peg.292rxn09136	0.00128644		COMMON	fig|269483.3.peg.292	rxn09136	fig|269483.3.peg.292rxn09136	0.00128644
COMMON	fig|269483.3.peg.292	rxn09135	fig|269483.3.peg.292rxn09135	0.00128644		COMMON	fig|269483.3.peg.292	rxn09135	fig|269483.3.peg.292rxn09135	0.00128644
COMMON	fig|269483.3.peg.292	rxn09134	fig|269483.3.peg.292rxn09134	0.00128644		COMMON	fig|269483.3.peg.292	rxn09134	fig|269483.3.peg.292rxn09134	0.00128644
COMMON	fig|269483.3.peg.292	rxn09148	fig|269483.3.peg.292rxn09148	0.00128644		COMMON	fig|269483.3.peg.292	rxn09148	fig|269483.3.peg.292rxn09148	0.00128644
COMMON	fig|269483.3.peg.292	rxn09142	fig|269483.3.peg.292rxn09142	0.00128644		COMMON	fig|269483.3.peg.292	rxn09142	fig|269483.3.peg.292rxn09142	0.00128644
COMMON	fig|269483.3.peg.292	rxn09143	fig|269483.3.peg.292rxn09143	0.00128644		COMMON	fig|269483.3.peg.292	rxn09143	fig|269483.3.peg.292rxn09143	0.00128644
COMMON	fig|269483.3.peg.292	rxn09140	fig|269483.3.peg.292rxn09140	0.00128644		COMMON	fig|269483.3.peg.292	rxn09140	fig|269483.3.peg.292rxn09140	0.00128644
COMMON	fig|269483.3.peg.292	rxn09141	fig|269483.3.peg.292rxn09141	0.00128644		COMMON	fig|269483.3.peg.292	rxn09141	fig|269483.3.peg.292rxn09141	0.00128644
COMMON	fig|269483.3.peg.292	rxn09146	fig|269483.3.peg.292rxn09146	0.00128644		COMMON	fig|269483.3.peg.292	rxn09146	fig|269483.3.peg.292rxn09146	0.00128644
COMMON	fig|269483.3.peg.6042	rxn03075	fig|269483.3.peg.6042rxn03075	0.00154318		COMMON	fig|269483.3.peg.6042	rxn03075	fig|269483.3.peg.6042rxn03075	0.00154318
COMMON	fig|269483.3.peg.4140	rxn00509	fig|269483.3.peg.4140rxn00509	0.20684		COMMON	fig|269483.3.peg.4140	rxn00509	fig|269483.3.peg.4140rxn00509	0.20684
COMMON	fig|269483.3.peg.4140	rxn01729	fig|269483.3.peg.4140rxn01729	0.0480262		COMMON	fig|269483.3.peg.4140	rxn01729	fig|269483.3.peg.4140rxn01729	0.0480262
COMMON	fig|269483.3.peg.3164	rxn02832	fig|269483.3.peg.3164rxn02832	0.0195953		COMMON	fig|269483.3.peg.3164	rxn02832	fig|269483.3.peg.3164rxn02832	0.0195953
COMMON	fig|269483.3.peg.6968	rxn03538	fig|269483.3.peg.6968rxn03538	0.947716		COMMON	fig|269483.3.peg.6968	rxn03538	fig|269483.3.peg.6968rxn03538	0.947716
COMMON	fig|269483.3.peg.4798	rxn03030	fig|269483.3.peg.4798rxn03030	0.237475		COMMON	fig|269483.3.peg.4798	rxn03030	fig|269483.3.peg.4798rxn03030	0.237475
COMMON	fig|269483.3.peg.5891	rxn01022	fig|269483.3.peg.5891rxn01022	0.476185		COMMON	fig|269483.3.peg.5891	rxn01022	fig|269483.3.peg.5891rxn01022	0.476185
COMMON	fig|269483.3.peg.4145	rxn01022	fig|269483.3.peg.4145rxn01022	0.519171		COMMON	fig|269483.3.peg.4145	rxn01022	fig|269483.3.peg.4145rxn01022	0.519171
COMMON	fig|269483.3.peg.4675	rxn01825	fig|269483.3.peg.4675rxn01825	0.983926		COMMON	fig|269483.3.peg.4675	rxn01825	fig|269483.3.peg.4675rxn01825	0.983926
COMMON	fig|269483.3.peg.1617	rxn01022	fig|269483.3.peg.1617rxn01022	0.417924		COMMON	fig|269483.3.peg.1617	rxn01022	fig|269483.3.peg.1617rxn01022	0.417924
COMMON	fig|269483.3.peg.2437	rxn01171	fig|269483.3.peg.2437rxn01171	0.0757906		COMMON	fig|269483.3.peg.2437	rxn01171	fig|269483.3.peg.2437rxn01171	0.0757906
COMMON	fig|269483.3.peg.1068	rxn01618	fig|269483.3.peg.1068rxn01618	0.00562461		COMMON	fig|269483.3.peg.1068	rxn01618	fig|269483.3.peg.1068rxn01618	0.00562461
COMMON	fig|269483.3.peg.634	rxn00589	fig|269483.3.peg.634rxn00589	0.786637		COMMON	fig|269483.3.peg.634	rxn00589	fig|269483.3.peg.634rxn00589	0.786637
COMMON	fig|269483.3.peg.6933	rxn01523	fig|269483.3.peg.6933rxn01523	0.000416849		COMMON	fig|269483.3.peg.6933	rxn01523	fig|269483.3.peg.6933rxn01523	0.000416849
COMMON	fig|269483.3.peg.4447	rxn03869	fig|269483.3.peg.4447rxn03869	0.00709643		COMMON	fig|269483.3.peg.4447	rxn03869	fig|269483.3.peg.4447rxn03869	0.00709643
COMMON	fig|269483.3.peg.4447	rxn03839	fig|269483.3.peg.4447rxn03839	0.00709643		COMMON	fig|269483.3.peg.4447	rxn03839	fig|269483.3.peg.4447rxn03839	0.00709643
COMMON	fig|269483.3.peg.614	rxn03057	fig|269483.3.peg.614rxn03057	0.0147224		COMMON	fig|269483.3.peg.614	rxn03057	fig|269483.3.peg.614rxn03057	0.0147224
COMMON	fig|269483.3.peg.614	rxn01620	fig|269483.3.peg.614rxn01620	0.241126		COMMON	fig|269483.3.peg.614	rxn01620	fig|269483.3.peg.614rxn01620	0.241126
COMMON	fig|269483.3.peg.614	rxn05104	fig|269483.3.peg.614rxn05104	0.228315		COMMON	fig|269483.3.peg.614	rxn05104	fig|269483.3.peg.614rxn05104	0.228315
COMMON	fig|269483.3.peg.201	rxn01258	fig|269483.3.peg.201rxn01258	0.68718		COMMON	fig|269483.3.peg.201	rxn01258	fig|269483.3.peg.201rxn01258	0.68718
COMMON	fig|269483.3.peg.5684	rxn02449	fig|269483.3.peg.5684rxn02449	0.102408		COMMON	fig|269483.3.peg.5684	rxn02449	fig|269483.3.peg.5684rxn02449	0.102408
COMMON	fig|269483.3.peg.126	rxn00509	fig|269483.3.peg.126rxn00509	0.20617		COMMON	fig|269483.3.peg.126	rxn00509	fig|269483.3.peg.126rxn00509	0.20617
COMMON	fig|269483.3.peg.126	rxn01729	fig|269483.3.peg.126rxn01729	0.054929		COMMON	fig|269483.3.peg.126	rxn01729	fig|269483.3.peg.126rxn01729	0.054929
COMMON	fig|269483.3.peg.5378	rxn02929	fig|269483.3.peg.5378rxn02929	0.394844		COMMON	fig|269483.3.peg.5378	rxn02929	fig|269483.3.peg.5378rxn02929	0.394844
COMMON	fig|269483.3.peg.6521	rxn03492	fig|269483.3.peg.6521rxn03492	0.974495		COMMON	fig|269483.3.peg.6521	rxn03492	fig|269483.3.peg.6521rxn03492	0.974495
COMMON	fig|269483.3.peg.6521	rxn04050	fig|269483.3.peg.6521rxn04050	0.974495		COMMON	fig|269483.3.peg.6521	rxn04050	fig|269483.3.peg.6521rxn04050	0.974495
COMMON	fig|269483.3.peg.3912	rxn00986	fig|269483.3.peg.3912rxn00986	0.97971		COMMON	fig|269483.3.peg.3912	rxn00986	fig|269483.3.peg.3912rxn00986	0.97971
COMMON	fig|269483.3.peg.619	rxn00589	fig|269483.3.peg.619rxn00589	0.654797		COMMON	fig|269483.3.peg.619	rxn00589	fig|269483.3.peg.619rxn00589	0.654797
COMMON	fig|272626.1.peg.1771	rxn11703	fig|272626.1.peg.1771rxn11703	0.884001		COMMON	fig|272626.1.peg.1771	rxn11703	fig|272626.1.peg.1771rxn11703	0.884001
COMMON	fig|272626.1.peg.1653	rxn09106	fig|272626.1.peg.1653rxn09106	0.504746		COMMON	fig|272626.1.peg.1653	rxn09106	fig|272626.1.peg.1653rxn09106	0.504746
COMMON	fig|272626.1.peg.1653	rxn09107	fig|272626.1.peg.1653rxn09107	0.504746		COMMON	fig|272626.1.peg.1653	rxn09107	fig|272626.1.peg.1653rxn09107	0.504746
COMMON	fig|272626.1.peg.1653	rxn09104	fig|272626.1.peg.1653rxn09104	0.504746		COMMON	fig|272626.1.peg.1653	rxn09104	fig|272626.1.peg.1653rxn09104	0.504746
COMMON	fig|272626.1.peg.1653	rxn09105	fig|272626.1.peg.1653rxn09105	0.504746		COMMON	fig|272626.1.peg.1653	rxn09105	fig|272626.1.peg.1653rxn09105	0.504746
COMMON	fig|272626.1.peg.1653	rxn09102	fig|272626.1.peg.1653rxn09102	0.504746		COMMON	fig|272626.1.peg.1653	rxn09102	fig|272626.1.peg.1653rxn09102	0.504746
COMMON	fig|272626.1.peg.1653	rxn09103	fig|272626.1.peg.1653rxn09103	0.504746		COMMON	fig|272626.1.peg.1653	rxn09103	fig|272626.1.peg.1653rxn09103	0.504746
COMMON	fig|272626.1.peg.1653	rxn09101	fig|272626.1.peg.1653rxn09101	0.504746		COMMON	fig|272626.1.peg.1653	rxn09101	fig|272626.1.peg.1653rxn09101	0.504746
COMMON	fig|272626.1.peg.1653	rxn10265	fig|272626.1.peg.1653rxn10265	0.504746		COMMON	fig|272626.1.peg.1653	rxn10265	fig|272626.1.peg.1653rxn10265	0.504746
COMMON	fig|272626.1.peg.1653	rxn10266	fig|272626.1.peg.1653rxn10266	0.504746		COMMON	fig|272626.1.peg.1653	rxn10266	fig|272626.1.peg.1653rxn10266	0.504746
COMMON	fig|272626.1.peg.2650	rxn05381	fig|272626.1.peg.2650rxn05381	0.759174		COMMON	fig|272626.1.peg.2650	rxn05381	fig|272626.1.peg.2650rxn05381	0.759174
COMMON	fig|272626.1.peg.2650	rxn05390	fig|272626.1.peg.2650rxn05390	0.759174		COMMON	fig|272626.1.peg.2650	rxn05390	fig|272626.1.peg.2650rxn05390	0.759174
COMMON	fig|272626.1.peg.2650	rxn05402	fig|272626.1.peg.2650rxn05402	0.759174		COMMON	fig|272626.1.peg.2650	rxn05402	fig|272626.1.peg.2650rxn05402	0.759174
COMMON	fig|272626.1.peg.2650	rxn05386	fig|272626.1.peg.2650rxn05386	0.759174		COMMON	fig|272626.1.peg.2650	rxn05386	fig|272626.1.peg.2650rxn05386	0.759174
COMMON	fig|272626.1.peg.2650	rxn05394	fig|272626.1.peg.2650rxn05394	0.759174		COMMON	fig|272626.1.peg.2650	rxn05394	fig|272626.1.peg.2650rxn05394	0.759174
COMMON	fig|272626.1.peg.2650	rxn05377	fig|272626.1.peg.2650rxn05377	0.759174		COMMON	fig|272626.1.peg.2650	rxn05377	fig|272626.1.peg.2650rxn05377	0.759174
COMMON	fig|272626.1.peg.2650	rxn05398	fig|272626.1.peg.2650rxn05398	0.759174		COMMON	fig|272626.1.peg.2650	rxn05398	fig|272626.1.peg.2650rxn05398	0.759174
COMMON	fig|272626.1.peg.2650	rxn05332	fig|272626.1.peg.2650rxn05332	0.759174		COMMON	fig|272626.1.peg.2650	rxn05332	fig|272626.1.peg.2650rxn05332	0.759174
COMMON	fig|272626.1.peg.2650	rxn05373	fig|272626.1.peg.2650rxn05373	0.759174		COMMON	fig|272626.1.peg.2650	rxn05373	fig|272626.1.peg.2650rxn05373	0.759174
COMMON	fig|272626.1.peg.2650	rxn05369	fig|272626.1.peg.2650rxn05369	0.759174		COMMON	fig|272626.1.peg.2650	rxn05369	fig|272626.1.peg.2650rxn05369	0.759174
COMMON	fig|272626.1.peg.2650	rxn05331	fig|272626.1.peg.2650rxn05331	0.759174		COMMON	fig|272626.1.peg.2650	rxn05331	fig|272626.1.peg.2650rxn05331	0.759174
COMMON	fig|272626.1.peg.2650	rxn05330	fig|272626.1.peg.2650rxn05330	0.759174		COMMON	fig|272626.1.peg.2650	rxn05330	fig|272626.1.peg.2650rxn05330	0.759174
COMMON	fig|272626.1.peg.2650	rxn05333	fig|272626.1.peg.2650rxn05333	0.759174		COMMON	fig|272626.1.peg.2650	rxn05333	fig|272626.1.peg.2650rxn05333	0.759174
COMMON	fig|272626.1.peg.2650	rxn05462	fig|272626.1.peg.2650rxn05462	0.759174		COMMON	fig|272626.1.peg.2650	rxn05462	fig|272626.1.peg.2650rxn05462	0.759174
COMMON	fig|272626.1.peg.2650	rxn05334	fig|272626.1.peg.2650rxn05334	0.759174		COMMON	fig|272626.1.peg.2650	rxn05334	fig|272626.1.peg.2650rxn05334	0.759174
COMMON	fig|272626.1.peg.2650	rxn05329	fig|272626.1.peg.2650rxn05329	0.759174		COMMON	fig|272626.1.peg.2650	rxn05329	fig|272626.1.peg.2650rxn05329	0.759174
COMMON	fig|272626.1.peg.2650	rxn05406	fig|272626.1.peg.2650rxn05406	0.759174		COMMON	fig|272626.1.peg.2650	rxn05406	fig|272626.1.peg.2650rxn05406	0.759174
COMMON	fig|272626.1.peg.2650	rxn05365	fig|272626.1.peg.2650rxn05365	0.759174		COMMON	fig|272626.1.peg.2650	rxn05365	fig|272626.1.peg.2650rxn05365	0.759174
COMMON	fig|272626.1.peg.2650	rxn05361	fig|272626.1.peg.2650rxn05361	0.759174		COMMON	fig|272626.1.peg.2650	rxn05361	fig|272626.1.peg.2650rxn05361	0.759174
COMMON	fig|272626.1.peg.1102	rxn03538	fig|272626.1.peg.1102rxn03538	0.903661		COMMON	fig|272626.1.peg.1102	rxn03538	fig|272626.1.peg.1102rxn03538	0.903661
COMMON	fig|272626.1.peg.1064	rxn10291	fig|272626.1.peg.1064rxn10291	0.563389		COMMON	fig|272626.1.peg.1064	rxn10291	fig|272626.1.peg.1064rxn10291	0.563389
COMMON	fig|272626.1.peg.1064	rxn10292	fig|272626.1.peg.1064rxn10292	0.563389		COMMON	fig|272626.1.peg.1064	rxn10292	fig|272626.1.peg.1064rxn10292	0.563389
COMMON	fig|272626.1.peg.1064	rxn10293	fig|272626.1.peg.1064rxn10293	0.563389		COMMON	fig|272626.1.peg.1064	rxn10293	fig|272626.1.peg.1064rxn10293	0.563389
COMMON	fig|272626.1.peg.308	rxn01630	fig|272626.1.peg.308rxn01630	0.0591948		COMMON	fig|272626.1.peg.308	rxn01630	fig|272626.1.peg.308rxn01630	0.0591948
COMMON	fig|272626.1.peg.1339	rxn00119	fig|272626.1.peg.1339rxn00119	0.984871		COMMON	fig|272626.1.peg.1339	rxn00119	fig|272626.1.peg.1339rxn00119	0.984871
COMMON	fig|272626.1.peg.1144	rxn06979	fig|272626.1.peg.1144rxn06979	0.992561		COMMON	fig|272626.1.peg.1144	rxn06979	fig|272626.1.peg.1144rxn06979	0.992561
COMMON	fig|272626.1.peg.1144	rxn11544	fig|272626.1.peg.1144rxn11544	0.992561		COMMON	fig|272626.1.peg.1144	rxn11544	fig|272626.1.peg.1144rxn11544	0.992561
COMMON	fig|272626.1.peg.2217	rxn08129	fig|272626.1.peg.2217rxn08129	0.0148474		COMMON	fig|272626.1.peg.2217	rxn08129	fig|272626.1.peg.2217rxn08129	0.0148474
COMMON	fig|272626.1.peg.1774	rxn08333	fig|272626.1.peg.1774rxn08333	0.530663		COMMON	fig|272626.1.peg.1774	rxn08333	fig|272626.1.peg.1774rxn08333	0.530663
COMMON	fig|272626.1.peg.1149	rxn03491	fig|272626.1.peg.1149rxn03491	0.906776		COMMON	fig|272626.1.peg.1149	rxn03491	fig|272626.1.peg.1149rxn03491	0.906776
COMMON	fig|272626.1.peg.1148	rxn03491	fig|272626.1.peg.1148rxn03491	0.902185		COMMON	fig|272626.1.peg.1148	rxn03491	fig|272626.1.peg.1148rxn03491	0.902185
COMMON	fig|272626.1.peg.802	rxn00102	fig|272626.1.peg.802rxn00102	0.895579		COMMON	fig|272626.1.peg.802	rxn00102	fig|272626.1.peg.802rxn00102	0.895579
COMMON	fig|272626.1.peg.2008	rxn02929	fig|272626.1.peg.2008rxn02929	0.244225		COMMON	fig|272626.1.peg.2008	rxn02929	fig|272626.1.peg.2008rxn02929	0.244225
COMMON	fig|272626.1.peg.1198	rxn08783	fig|272626.1.peg.1198rxn08783	0.00172551		COMMON	fig|272626.1.peg.1198	rxn08783	fig|272626.1.peg.1198rxn08783	0.00172551
COMMON	fig|272626.1.peg.906	rxn01851	fig|272626.1.peg.906rxn01851	0.0942326		COMMON	fig|272626.1.peg.906	rxn01851	fig|272626.1.peg.906rxn01851	0.0942326
COMMON	fig|272626.1.peg.906	rxn00979	fig|272626.1.peg.906rxn00979	0.0641758		COMMON	fig|272626.1.peg.906	rxn00979	fig|272626.1.peg.906rxn00979	0.0641758
COMMON	fig|272626.1.peg.1490	rxn08299	fig|272626.1.peg.1490rxn08299	0.956239		COMMON	fig|272626.1.peg.1490	rxn08299	fig|272626.1.peg.1490rxn08299	0.956239
COMMON	fig|272626.1.peg.1490	rxn10254	fig|272626.1.peg.1490rxn10254	0.956239		COMMON	fig|272626.1.peg.1490	rxn10254	fig|272626.1.peg.1490rxn10254	0.956239
COMMON	fig|272626.1.peg.972	rxn00205	fig|272626.1.peg.972rxn00205	0.928948		COMMON	fig|272626.1.peg.972	rxn00205	fig|272626.1.peg.972rxn00205	0.928948
COMMON	fig|272626.1.peg.2849	rxn00669	fig|272626.1.peg.2849rxn00669	0.92414		COMMON	fig|272626.1.peg.2849	rxn00669	fig|272626.1.peg.2849rxn00669	0.92414
COMMON	fig|272626.1.peg.1162	rxn05029	fig|272626.1.peg.1162rxn05029	0.983956		COMMON	fig|272626.1.peg.1162	rxn05029	fig|272626.1.peg.1162rxn05029	0.983956
COMMON	fig|272626.1.peg.211	rxn09199	fig|272626.1.peg.211rxn09199	0.415187		COMMON	fig|272626.1.peg.211	rxn09199	fig|272626.1.peg.211rxn09199	0.415187
COMMON	fig|272626.1.peg.211	rxn10232	fig|272626.1.peg.211rxn10232	0.415187		COMMON	fig|272626.1.peg.211	rxn10232	fig|272626.1.peg.211rxn10232	0.415187
COMMON	fig|272626.1.peg.211	rxn10233	fig|272626.1.peg.211rxn10233	0.415187		COMMON	fig|272626.1.peg.211	rxn10233	fig|272626.1.peg.211rxn10233	0.415187
COMMON	fig|272626.1.peg.211	rxn09202	fig|272626.1.peg.211rxn09202	0.415187		COMMON	fig|272626.1.peg.211	rxn09202	fig|272626.1.peg.211rxn09202	0.415187
COMMON	fig|272626.1.peg.1761	rxn00416	fig|272626.1.peg.1761rxn00416	0.826849		COMMON	fig|272626.1.peg.1761	rxn00416	fig|272626.1.peg.1761rxn00416	0.826849
COMMON	fig|272626.1.peg.1152	rxn03513	fig|272626.1.peg.1152rxn03513	0.98016		COMMON	fig|272626.1.peg.1152	rxn03513	fig|272626.1.peg.1152rxn03513	0.98016
COMMON	fig|272626.1.peg.1152	rxn04047	fig|272626.1.peg.1152rxn04047	0.98016		COMMON	fig|272626.1.peg.1152	rxn04047	fig|272626.1.peg.1152rxn04047	0.98016
COMMON	fig|272626.1.peg.1153	rxn03492	fig|272626.1.peg.1153rxn03492	0.961578		COMMON	fig|272626.1.peg.1153	rxn03492	fig|272626.1.peg.1153rxn03492	0.961578
COMMON	fig|272626.1.peg.1153	rxn04050	fig|272626.1.peg.1153rxn04050	0.961578		COMMON	fig|272626.1.peg.1153	rxn04050	fig|272626.1.peg.1153rxn04050	0.961578
COMMON	fig|272626.1.peg.2773	rxn03167	fig|272626.1.peg.2773rxn03167	0.780596		COMMON	fig|272626.1.peg.2773	rxn03167	fig|272626.1.peg.2773rxn03167	0.780596
COMMON	fig|272626.1.peg.2112	rxn09106	fig|272626.1.peg.2112rxn09106	0.567437		COMMON	fig|272626.1.peg.2112	rxn09106	fig|272626.1.peg.2112rxn09106	0.567437
COMMON	fig|272626.1.peg.2112	rxn09107	fig|272626.1.peg.2112rxn09107	0.567437		COMMON	fig|272626.1.peg.2112	rxn09107	fig|272626.1.peg.2112rxn09107	0.567437
COMMON	fig|272626.1.peg.2112	rxn09104	fig|272626.1.peg.2112rxn09104	0.567437		COMMON	fig|272626.1.peg.2112	rxn09104	fig|272626.1.peg.2112rxn09104	0.567437
COMMON	fig|272626.1.peg.2112	rxn09105	fig|272626.1.peg.2112rxn09105	0.567437		COMMON	fig|272626.1.peg.2112	rxn09105	fig|272626.1.peg.2112rxn09105	0.567437
COMMON	fig|272626.1.peg.2112	rxn09102	fig|272626.1.peg.2112rxn09102	0.567437		COMMON	fig|272626.1.peg.2112	rxn09102	fig|272626.1.peg.2112rxn09102	0.567437
COMMON	fig|272626.1.peg.2112	rxn09103	fig|272626.1.peg.2112rxn09103	0.567437		COMMON	fig|272626.1.peg.2112	rxn09103	fig|272626.1.peg.2112rxn09103	0.567437
COMMON	fig|272626.1.peg.2112	rxn09101	fig|272626.1.peg.2112rxn09101	0.567437		COMMON	fig|272626.1.peg.2112	rxn09101	fig|272626.1.peg.2112rxn09101	0.567437
COMMON	fig|272626.1.peg.2112	rxn10265	fig|272626.1.peg.2112rxn10265	0.567437		COMMON	fig|272626.1.peg.2112	rxn10265	fig|272626.1.peg.2112rxn10265	0.567437
COMMON	fig|272626.1.peg.2112	rxn10266	fig|272626.1.peg.2112rxn10266	0.567437		COMMON	fig|272626.1.peg.2112	rxn10266	fig|272626.1.peg.2112rxn10266	0.567437
COMMON	fig|272626.1.peg.2806	rxn09953	fig|272626.1.peg.2806rxn09953	0.204291		COMMON	fig|272626.1.peg.2806	rxn09953	fig|272626.1.peg.2806rxn09953	0.204291
COMMON	fig|272626.1.peg.2153	rxn03991	fig|272626.1.peg.2153rxn03991	0.595032		COMMON	fig|272626.1.peg.2153	rxn03991	fig|272626.1.peg.2153rxn03991	0.595032
COMMON	fig|272626.1.peg.1463	rxn01644	fig|272626.1.peg.1463rxn01644	0.0341599		COMMON	fig|272626.1.peg.1463	rxn01644	fig|272626.1.peg.1463rxn01644	0.0341599
COMMON	fig|272626.1.peg.360	rxn05040	fig|272626.1.peg.360rxn05040	0.00638767		COMMON	fig|272626.1.peg.360	rxn05040	fig|272626.1.peg.360rxn05040	0.00638767
COMMON	fig|272626.1.peg.2321	rxn00569	fig|272626.1.peg.2321rxn00569	0.0324471		COMMON	fig|272626.1.peg.2321	rxn00569	fig|272626.1.peg.2321rxn00569	0.0324471
COMMON	fig|272626.1.peg.1118	rxn05029	fig|272626.1.peg.1118rxn05029	0.95869		COMMON	fig|272626.1.peg.1118	rxn05029	fig|272626.1.peg.1118rxn05029	0.95869
COMMON	fig|272626.1.peg.816	rxn01501	fig|272626.1.peg.816rxn01501	0.979279		COMMON	fig|272626.1.peg.816	rxn01501	fig|272626.1.peg.816rxn01501	0.979279
COMMON	fig|272626.1.peg.640	rxn05516	fig|272626.1.peg.640rxn05516	0.760329		COMMON	fig|272626.1.peg.640	rxn05516	fig|272626.1.peg.640rxn05516	0.760329
COMMON	fig|272626.1.peg.2039	rxn04996	fig|272626.1.peg.2039rxn04996	0.0524723		COMMON	fig|272626.1.peg.2039	rxn04996	fig|272626.1.peg.2039rxn04996	0.0524723
COMMON	fig|272626.1.peg.2039	rxn08756	fig|272626.1.peg.2039rxn08756	0.0524723		COMMON	fig|272626.1.peg.2039	rxn08756	fig|272626.1.peg.2039rxn08756	0.0524723
COMMON	fig|272626.1.peg.2039	rxn08352	fig|272626.1.peg.2039rxn08352	0.0524723		COMMON	fig|272626.1.peg.2039	rxn08352	fig|272626.1.peg.2039rxn08352	0.0524723
COMMON	fig|272626.1.peg.2039	rxn04113	fig|272626.1.peg.2039rxn04113	0.0524723		COMMON	fig|272626.1.peg.2039	rxn04113	fig|272626.1.peg.2039rxn04113	0.0524723
COMMON	fig|272626.1.peg.3064	rxn00756	fig|272626.1.peg.3064rxn00756	0.00385587		COMMON	fig|272626.1.peg.3064	rxn00756	fig|272626.1.peg.3064rxn00756	0.00385587
COMMON	fig|272626.1.peg.2180	rxn01022	fig|272626.1.peg.2180rxn01022	0.492172		COMMON	fig|272626.1.peg.2180	rxn01022	fig|272626.1.peg.2180rxn01022	0.492172
COMMON	fig|272626.1.peg.1810	rxn00623	fig|272626.1.peg.1810rxn00623	0.00756582		COMMON	fig|272626.1.peg.1810	rxn00623	fig|272626.1.peg.1810rxn00623	0.00756582
COMMON	fig|272626.1.peg.2682	rxn10193	fig|272626.1.peg.2682rxn10193	0.0103191		COMMON	fig|272626.1.peg.2682	rxn10193	fig|272626.1.peg.2682rxn10193	0.0103191
COMMON	fig|272626.1.peg.2682	rxn10302	fig|272626.1.peg.2682rxn10302	0.0103191		COMMON	fig|272626.1.peg.2682	rxn10302	fig|272626.1.peg.2682rxn10302	0.0103191
COMMON	fig|272626.1.peg.2682	rxn10300	fig|272626.1.peg.2682rxn10300	0.0103191		COMMON	fig|272626.1.peg.2682	rxn10300	fig|272626.1.peg.2682rxn10300	0.0103191
COMMON	fig|272626.1.peg.2682	rxn10301	fig|272626.1.peg.2682rxn10301	0.0103191		COMMON	fig|272626.1.peg.2682	rxn10301	fig|272626.1.peg.2682rxn10301	0.0103191
COMMON	fig|272626.1.peg.2507	rxn05515	fig|272626.1.peg.2507rxn05515	0.127664		COMMON	fig|272626.1.peg.2507	rxn05515	fig|272626.1.peg.2507rxn05515	0.127664
COMMON	fig|272626.1.peg.2507	rxn10147	fig|272626.1.peg.2507rxn10147	0.127664		COMMON	fig|272626.1.peg.2507	rxn10147	fig|272626.1.peg.2507rxn10147	0.127664
COMMON	fig|272626.1.peg.1954	rxn05528	fig|272626.1.peg.1954rxn05528	0.925557		COMMON	fig|272626.1.peg.1954	rxn05528	fig|272626.1.peg.1954rxn05528	0.925557
COMMON	fig|272626.1.peg.1954	rxn05516	fig|272626.1.peg.1954rxn05516	0.864212		COMMON	fig|272626.1.peg.1954	rxn05516	fig|272626.1.peg.1954rxn05516	0.864212
COMMON	fig|272635.1.peg.120	rxn00283	fig|272635.1.peg.120rxn00283	0.00204428		COMMON	fig|272635.1.peg.120	rxn00283	fig|272635.1.peg.120rxn00283	0.00204428
COMMON	fig|272635.1.peg.740	rxn00751	fig|272635.1.peg.740rxn00751	0.509176		COMMON	fig|272635.1.peg.740	rxn00751	fig|272635.1.peg.740rxn00751	0.509176
COMMON	fig|272635.1.peg.441	rxn06600	fig|272635.1.peg.441rxn06600	0.906352		COMMON	fig|272635.1.peg.441	rxn06600	fig|272635.1.peg.441rxn06600	0.906352
COMMON	fig|272635.1.peg.264	rxn01580	fig|272635.1.peg.264rxn01580	9.32039e-05		COMMON	fig|272635.1.peg.264	rxn01580	fig|272635.1.peg.264rxn01580	9.32039e-05
COMMON	fig|272635.1.peg.718	rxn09310	fig|272635.1.peg.718rxn09310	0.779473		COMMON	fig|272635.1.peg.718	rxn09310	fig|272635.1.peg.718rxn09310	0.779473
COMMON	fig|272635.1.peg.228	rxn01951	fig|272635.1.peg.228rxn01951	0.10771		COMMON	fig|272635.1.peg.228	rxn01951	fig|272635.1.peg.228rxn01951	0.10771
COMMON	fig|272635.1.peg.220	rxn01517	fig|272635.1.peg.220rxn01517	0.977018		COMMON	fig|272635.1.peg.220	rxn01517	fig|272635.1.peg.220rxn01517	0.977018
COMMON	fig|272635.1.peg.220	rxn00119	fig|272635.1.peg.220rxn00119	0.977018		COMMON	fig|272635.1.peg.220	rxn00119	fig|272635.1.peg.220rxn00119	0.977018
COMMON	fig|272635.1.peg.360	rxn00787	fig|272635.1.peg.360rxn00787	0.276047		COMMON	fig|272635.1.peg.360	rxn00787	fig|272635.1.peg.360rxn00787	0.276047
COMMON	fig|272635.1.peg.172	rxn09310	fig|272635.1.peg.172rxn09310	0.0522025		COMMON	fig|272635.1.peg.172	rxn09310	fig|272635.1.peg.172rxn09310	0.0522025
COMMON	fig|272635.1.peg.173	rxn09310	fig|272635.1.peg.173rxn09310	0.0509315		COMMON	fig|272635.1.peg.173	rxn09310	fig|272635.1.peg.173rxn09310	0.0509315
COMMON	fig|272635.1.peg.36	rxn08850	fig|272635.1.peg.36rxn08850	0.0133285		COMMON	fig|272635.1.peg.36	rxn08850	fig|272635.1.peg.36rxn08850	0.0133285
COMMON	fig|272635.1.peg.36	rxn08802	fig|272635.1.peg.36rxn08802	0.0133285		COMMON	fig|272635.1.peg.36	rxn08802	fig|272635.1.peg.36rxn08802	0.0133285
COMMON	fig|272635.1.peg.36	rxn08798	fig|272635.1.peg.36rxn08798	0.0133285		COMMON	fig|272635.1.peg.36	rxn08798	fig|272635.1.peg.36rxn08798	0.0133285
COMMON	fig|272635.1.peg.36	rxn08799	fig|272635.1.peg.36rxn08799	0.0133285		COMMON	fig|272635.1.peg.36	rxn08799	fig|272635.1.peg.36rxn08799	0.0133285
COMMON	fig|272635.1.peg.36	rxn08800	fig|272635.1.peg.36rxn08800	0.0133285		COMMON	fig|272635.1.peg.36	rxn08800	fig|272635.1.peg.36rxn08800	0.0133285
COMMON	fig|272635.1.peg.36	rxn08801	fig|272635.1.peg.36rxn08801	0.0133285		COMMON	fig|272635.1.peg.36	rxn08801	fig|272635.1.peg.36rxn08801	0.0133285
COMMON	fig|272635.1.peg.36	rxn08811	fig|272635.1.peg.36rxn08811	0.0133285		COMMON	fig|272635.1.peg.36	rxn08811	fig|272635.1.peg.36rxn08811	0.0133285
COMMON	fig|272635.1.peg.36	rxn08843	fig|272635.1.peg.36rxn08843	0.0133285		COMMON	fig|272635.1.peg.36	rxn08843	fig|272635.1.peg.36rxn08843	0.0133285
COMMON	fig|272635.1.peg.36	rxn08796	fig|272635.1.peg.36rxn08796	0.0133285		COMMON	fig|272635.1.peg.36	rxn08796	fig|272635.1.peg.36rxn08796	0.0133285
COMMON	fig|272635.1.peg.36	rxn08797	fig|272635.1.peg.36rxn08797	0.0133285		COMMON	fig|272635.1.peg.36	rxn08797	fig|272635.1.peg.36rxn08797	0.0133285
COMMON	fig|272635.1.peg.103	rxn05746	fig|272635.1.peg.103rxn05746	0.284594		COMMON	fig|272635.1.peg.103	rxn05746	fig|272635.1.peg.103rxn05746	0.284594
COMMON	fig|272635.1.peg.597	rxn00710	fig|272635.1.peg.597rxn00710	0.000169785		COMMON	fig|272635.1.peg.597	rxn00710	fig|272635.1.peg.597rxn00710	0.000169785
COMMON	fig|272635.1.peg.772	rxn09272	fig|272635.1.peg.772rxn09272	0.905016		COMMON	fig|272635.1.peg.772	rxn09272	fig|272635.1.peg.772rxn09272	0.905016
COMMON	fig|272635.1.peg.772	rxn01790	fig|272635.1.peg.772rxn01790	0.00595339		COMMON	fig|272635.1.peg.772	rxn01790	fig|272635.1.peg.772rxn01790	0.00595339
COMMON	fig|272635.1.peg.772	rxn08527	fig|272635.1.peg.772rxn08527	0.905016		COMMON	fig|272635.1.peg.772	rxn08527	fig|272635.1.peg.772rxn08527	0.905016
COMMON	fig|272635.1.peg.38	rxn08850	fig|272635.1.peg.38rxn08850	0.0149126		COMMON	fig|272635.1.peg.38	rxn08850	fig|272635.1.peg.38rxn08850	0.0149126
COMMON	fig|272635.1.peg.38	rxn08802	fig|272635.1.peg.38rxn08802	0.0149126		COMMON	fig|272635.1.peg.38	rxn08802	fig|272635.1.peg.38rxn08802	0.0149126
COMMON	fig|272635.1.peg.38	rxn08798	fig|272635.1.peg.38rxn08798	0.0149126		COMMON	fig|272635.1.peg.38	rxn08798	fig|272635.1.peg.38rxn08798	0.0149126
COMMON	fig|272635.1.peg.38	rxn08799	fig|272635.1.peg.38rxn08799	0.0149126		COMMON	fig|272635.1.peg.38	rxn08799	fig|272635.1.peg.38rxn08799	0.0149126
COMMON	fig|272635.1.peg.38	rxn08800	fig|272635.1.peg.38rxn08800	0.0149126		COMMON	fig|272635.1.peg.38	rxn08800	fig|272635.1.peg.38rxn08800	0.0149126
COMMON	fig|272635.1.peg.38	rxn08801	fig|272635.1.peg.38rxn08801	0.0149126		COMMON	fig|272635.1.peg.38	rxn08801	fig|272635.1.peg.38rxn08801	0.0149126
COMMON	fig|272635.1.peg.38	rxn08811	fig|272635.1.peg.38rxn08811	0.0149126		COMMON	fig|272635.1.peg.38	rxn08811	fig|272635.1.peg.38rxn08811	0.0149126
COMMON	fig|272635.1.peg.38	rxn08843	fig|272635.1.peg.38rxn08843	0.0149126		COMMON	fig|272635.1.peg.38	rxn08843	fig|272635.1.peg.38rxn08843	0.0149126
COMMON	fig|272635.1.peg.38	rxn08796	fig|272635.1.peg.38rxn08796	0.0149126		COMMON	fig|272635.1.peg.38	rxn08796	fig|272635.1.peg.38rxn08796	0.0149126
COMMON	fig|272635.1.peg.38	rxn08797	fig|272635.1.peg.38rxn08797	0.0149126		COMMON	fig|272635.1.peg.38	rxn08797	fig|272635.1.peg.38rxn08797	0.0149126
COMMON	fig|272635.1.peg.155	rxn05528	fig|272635.1.peg.155rxn05528	0.306052		COMMON	fig|272635.1.peg.155	rxn05528	fig|272635.1.peg.155rxn05528	0.306052
COMMON	fig|272635.1.peg.548	rxn00122	fig|272635.1.peg.548rxn00122	0.899966		COMMON	fig|272635.1.peg.548	rxn00122	fig|272635.1.peg.548rxn00122	0.899966
COMMON	fig|316407.3.peg.201	rxn10094	fig|316407.3.peg.201rxn10094	0.729096		COMMON	fig|316407.3.peg.201	rxn10094	fig|316407.3.peg.201rxn10094	0.729096
COMMON	fig|316407.3.peg.201	rxn03397	fig|316407.3.peg.201rxn03397	0.729096		COMMON	fig|316407.3.peg.201	rxn03397	fig|316407.3.peg.201rxn03397	0.729096
COMMON	fig|316407.3.peg.307	rxn02270	fig|316407.3.peg.307rxn02270	0.593386		COMMON	fig|316407.3.peg.307	rxn02270	fig|316407.3.peg.307rxn02270	0.593386
COMMON	fig|316407.3.peg.1302	rxn01972	fig|316407.3.peg.1302rxn01972	0.397416		COMMON	fig|316407.3.peg.1302	rxn01972	fig|316407.3.peg.1302rxn01972	0.397416
COMMON	fig|316407.3.peg.2641	rxn03057	fig|316407.3.peg.2641rxn03057	0.011367		COMMON	fig|316407.3.peg.2641	rxn03057	fig|316407.3.peg.2641rxn03057	0.011367
COMMON	fig|316407.3.peg.2641	rxn05104	fig|316407.3.peg.2641rxn05104	0.231542		COMMON	fig|316407.3.peg.2641	rxn05104	fig|316407.3.peg.2641rxn05104	0.231542
COMMON	fig|316407.3.peg.3315	rxn09128	fig|316407.3.peg.3315rxn09128	0.983426		COMMON	fig|316407.3.peg.3315	rxn09128	fig|316407.3.peg.3315rxn09128	0.983426
COMMON	fig|316407.3.peg.3315	rxn09129	fig|316407.3.peg.3315rxn09129	0.983426		COMMON	fig|316407.3.peg.3315	rxn09129	fig|316407.3.peg.3315rxn09129	0.983426
COMMON	fig|316407.3.peg.3315	rxn09160	fig|316407.3.peg.3315rxn09160	0.983426		COMMON	fig|316407.3.peg.3315	rxn09160	fig|316407.3.peg.3315rxn09160	0.983426
COMMON	fig|316407.3.peg.3315	rxn09161	fig|316407.3.peg.3315rxn09161	0.983426		COMMON	fig|316407.3.peg.3315	rxn09161	fig|316407.3.peg.3315rxn09161	0.983426
COMMON	fig|316407.3.peg.3315	rxn09162	fig|316407.3.peg.3315rxn09162	0.983426		COMMON	fig|316407.3.peg.3315	rxn09162	fig|316407.3.peg.3315rxn09162	0.983426
COMMON	fig|316407.3.peg.3315	rxn09163	fig|316407.3.peg.3315rxn09163	0.983426		COMMON	fig|316407.3.peg.3315	rxn09163	fig|316407.3.peg.3315rxn09163	0.983426
COMMON	fig|316407.3.peg.3315	rxn09123	fig|316407.3.peg.3315rxn09123	0.983426		COMMON	fig|316407.3.peg.3315	rxn09123	fig|316407.3.peg.3315rxn09123	0.983426
COMMON	fig|316407.3.peg.3315	rxn09124	fig|316407.3.peg.3315rxn09124	0.983426		COMMON	fig|316407.3.peg.3315	rxn09124	fig|316407.3.peg.3315rxn09124	0.983426
COMMON	fig|316407.3.peg.3315	rxn09125	fig|316407.3.peg.3315rxn09125	0.983426		COMMON	fig|316407.3.peg.3315	rxn09125	fig|316407.3.peg.3315rxn09125	0.983426
COMMON	fig|316407.3.peg.3315	rxn09126	fig|316407.3.peg.3315rxn09126	0.983426		COMMON	fig|316407.3.peg.3315	rxn09126	fig|316407.3.peg.3315rxn09126	0.983426
COMMON	fig|316407.3.peg.3315	rxn09127	fig|316407.3.peg.3315rxn09127	0.983426		COMMON	fig|316407.3.peg.3315	rxn09127	fig|316407.3.peg.3315rxn09127	0.983426
COMMON	fig|316407.3.peg.3315	rxn09164	fig|316407.3.peg.3315rxn09164	0.983426		COMMON	fig|316407.3.peg.3315	rxn09164	fig|316407.3.peg.3315rxn09164	0.983426
COMMON	fig|316407.3.peg.3315	rxn09159	fig|316407.3.peg.3315rxn09159	0.983426		COMMON	fig|316407.3.peg.3315	rxn09159	fig|316407.3.peg.3315rxn09159	0.983426
COMMON	fig|316407.3.peg.3315	rxn09158	fig|316407.3.peg.3315rxn09158	0.983426		COMMON	fig|316407.3.peg.3315	rxn09158	fig|316407.3.peg.3315rxn09158	0.983426
COMMON	fig|316407.3.peg.3315	rxn09155	fig|316407.3.peg.3315rxn09155	0.983426		COMMON	fig|316407.3.peg.3315	rxn09155	fig|316407.3.peg.3315rxn09155	0.983426
COMMON	fig|316407.3.peg.3315	rxn09154	fig|316407.3.peg.3315rxn09154	0.983426		COMMON	fig|316407.3.peg.3315	rxn09154	fig|316407.3.peg.3315rxn09154	0.983426
COMMON	fig|316407.3.peg.3315	rxn09157	fig|316407.3.peg.3315rxn09157	0.983426		COMMON	fig|316407.3.peg.3315	rxn09157	fig|316407.3.peg.3315rxn09157	0.983426
COMMON	fig|316407.3.peg.3315	rxn09151	fig|316407.3.peg.3315rxn09151	0.983426		COMMON	fig|316407.3.peg.3315	rxn09151	fig|316407.3.peg.3315rxn09151	0.983426
COMMON	fig|316407.3.peg.3315	rxn09153	fig|316407.3.peg.3315rxn09153	0.983426		COMMON	fig|316407.3.peg.3315	rxn09153	fig|316407.3.peg.3315rxn09153	0.983426
COMMON	fig|316407.3.peg.3315	rxn09152	fig|316407.3.peg.3315rxn09152	0.983426		COMMON	fig|316407.3.peg.3315	rxn09152	fig|316407.3.peg.3315rxn09152	0.983426
COMMON	fig|316407.3.peg.3315	rxn09139	fig|316407.3.peg.3315rxn09139	0.983426		COMMON	fig|316407.3.peg.3315	rxn09139	fig|316407.3.peg.3315rxn09139	0.983426
COMMON	fig|316407.3.peg.3315	rxn09138	fig|316407.3.peg.3315rxn09138	0.983426		COMMON	fig|316407.3.peg.3315	rxn09138	fig|316407.3.peg.3315rxn09138	0.983426
COMMON	fig|316407.3.peg.3315	rxn09133	fig|316407.3.peg.3315rxn09133	0.983426		COMMON	fig|316407.3.peg.3315	rxn09133	fig|316407.3.peg.3315rxn09133	0.983426
COMMON	fig|316407.3.peg.3315	rxn09132	fig|316407.3.peg.3315rxn09132	0.983426		COMMON	fig|316407.3.peg.3315	rxn09132	fig|316407.3.peg.3315rxn09132	0.983426
COMMON	fig|316407.3.peg.3315	rxn09131	fig|316407.3.peg.3315rxn09131	0.983426		COMMON	fig|316407.3.peg.3315	rxn09131	fig|316407.3.peg.3315rxn09131	0.983426
COMMON	fig|316407.3.peg.3315	rxn09130	fig|316407.3.peg.3315rxn09130	0.983426		COMMON	fig|316407.3.peg.3315	rxn09130	fig|316407.3.peg.3315rxn09130	0.983426
COMMON	fig|316407.3.peg.3315	rxn09137	fig|316407.3.peg.3315rxn09137	0.983426		COMMON	fig|316407.3.peg.3315	rxn09137	fig|316407.3.peg.3315rxn09137	0.983426
COMMON	fig|316407.3.peg.3315	rxn09136	fig|316407.3.peg.3315rxn09136	0.983426		COMMON	fig|316407.3.peg.3315	rxn09136	fig|316407.3.peg.3315rxn09136	0.983426
COMMON	fig|316407.3.peg.3315	rxn09135	fig|316407.3.peg.3315rxn09135	0.983426		COMMON	fig|316407.3.peg.3315	rxn09135	fig|316407.3.peg.3315rxn09135	0.983426
COMMON	fig|316407.3.peg.3315	rxn09134	fig|316407.3.peg.3315rxn09134	0.983426		COMMON	fig|316407.3.peg.3315	rxn09134	fig|316407.3.peg.3315rxn09134	0.983426
COMMON	fig|316407.3.peg.3315	rxn09148	fig|316407.3.peg.3315rxn09148	0.983426		COMMON	fig|316407.3.peg.3315	rxn09148	fig|316407.3.peg.3315rxn09148	0.983426
COMMON	fig|316407.3.peg.3315	rxn09142	fig|316407.3.peg.3315rxn09142	0.983426		COMMON	fig|316407.3.peg.3315	rxn09142	fig|316407.3.peg.3315rxn09142	0.983426
COMMON	fig|316407.3.peg.3315	rxn09143	fig|316407.3.peg.3315rxn09143	0.983426		COMMON	fig|316407.3.peg.3315	rxn09143	fig|316407.3.peg.3315rxn09143	0.983426
COMMON	fig|316407.3.peg.3315	rxn09140	fig|316407.3.peg.3315rxn09140	0.983426		COMMON	fig|316407.3.peg.3315	rxn09140	fig|316407.3.peg.3315rxn09140	0.983426
COMMON	fig|316407.3.peg.3315	rxn09141	fig|316407.3.peg.3315rxn09141	0.983426		COMMON	fig|316407.3.peg.3315	rxn09141	fig|316407.3.peg.3315rxn09141	0.983426
COMMON	fig|316407.3.peg.3315	rxn09146	fig|316407.3.peg.3315rxn09146	0.983426		COMMON	fig|316407.3.peg.3315	rxn09146	fig|316407.3.peg.3315rxn09146	0.983426
COMMON	fig|316407.3.peg.3315	rxn09144	fig|316407.3.peg.3315rxn09144	0.983426		COMMON	fig|316407.3.peg.3315	rxn09144	fig|316407.3.peg.3315rxn09144	0.983426
COMMON	fig|316407.3.peg.461	rxn01022	fig|316407.3.peg.461rxn01022	0.285309		COMMON	fig|316407.3.peg.461	rxn01022	fig|316407.3.peg.461rxn01022	0.285309
COMMON	fig|316407.3.peg.1356	rxn03433	fig|316407.3.peg.1356rxn03433	0.020745		COMMON	fig|316407.3.peg.1356	rxn03433	fig|316407.3.peg.1356rxn03433	0.020745
COMMON	fig|316407.3.peg.1969	rxn03030	fig|316407.3.peg.1969rxn03030	0.0869194		COMMON	fig|316407.3.peg.1969	rxn03030	fig|316407.3.peg.1969rxn03030	0.0869194
COMMON	fig|316407.3.peg.931	rxn00952	fig|316407.3.peg.931rxn00952	0.250501		COMMON	fig|316407.3.peg.931	rxn00952	fig|316407.3.peg.931rxn00952	0.250501
COMMON	fig|316407.3.peg.3160	rxn09997	fig|316407.3.peg.3160rxn09997	0.751399		COMMON	fig|316407.3.peg.3160	rxn09997	fig|316407.3.peg.3160rxn09997	0.751399
COMMON	fig|316407.3.peg.176	rxn05406	fig|316407.3.peg.176rxn05406	0.709716		COMMON	fig|316407.3.peg.176	rxn05406	fig|316407.3.peg.176rxn05406	0.709716
COMMON	fig|316407.3.peg.176	rxn05369	fig|316407.3.peg.176rxn05369	0.709716		COMMON	fig|316407.3.peg.176	rxn05369	fig|316407.3.peg.176rxn05369	0.709716
COMMON	fig|316407.3.peg.176	rxn05402	fig|316407.3.peg.176rxn05402	0.709716		COMMON	fig|316407.3.peg.176	rxn05402	fig|316407.3.peg.176rxn05402	0.709716
COMMON	fig|316407.3.peg.176	rxn05386	fig|316407.3.peg.176rxn05386	0.709716		COMMON	fig|316407.3.peg.176	rxn05386	fig|316407.3.peg.176rxn05386	0.709716
COMMON	fig|316407.3.peg.176	rxn05381	fig|316407.3.peg.176rxn05381	0.709716		COMMON	fig|316407.3.peg.176	rxn05381	fig|316407.3.peg.176rxn05381	0.709716
COMMON	fig|316407.3.peg.176	rxn05398	fig|316407.3.peg.176rxn05398	0.709716		COMMON	fig|316407.3.peg.176	rxn05398	fig|316407.3.peg.176rxn05398	0.709716
COMMON	fig|316407.3.peg.176	rxn05377	fig|316407.3.peg.176rxn05377	0.709716		COMMON	fig|316407.3.peg.176	rxn05377	fig|316407.3.peg.176rxn05377	0.709716
COMMON	fig|316407.3.peg.176	rxn05361	fig|316407.3.peg.176rxn05361	0.709716		COMMON	fig|316407.3.peg.176	rxn05361	fig|316407.3.peg.176rxn05361	0.709716
COMMON	fig|316407.3.peg.176	rxn05373	fig|316407.3.peg.176rxn05373	0.709716		COMMON	fig|316407.3.peg.176	rxn05373	fig|316407.3.peg.176rxn05373	0.709716
COMMON	fig|316407.3.peg.176	rxn05365	fig|316407.3.peg.176rxn05365	0.709716		COMMON	fig|316407.3.peg.176	rxn05365	fig|316407.3.peg.176rxn05365	0.709716
COMMON	fig|316407.3.peg.176	rxn05394	fig|316407.3.peg.176rxn05394	0.709716		COMMON	fig|316407.3.peg.176	rxn05394	fig|316407.3.peg.176rxn05394	0.709716
COMMON	fig|316407.3.peg.176	rxn05462	fig|316407.3.peg.176rxn05462	0.709716		COMMON	fig|316407.3.peg.176	rxn05462	fig|316407.3.peg.176rxn05462	0.709716
COMMON	fig|316407.3.peg.176	rxn05390	fig|316407.3.peg.176rxn05390	0.709716		COMMON	fig|316407.3.peg.176	rxn05390	fig|316407.3.peg.176rxn05390	0.709716
COMMON	fig|316407.3.peg.2197	rxn11703	fig|316407.3.peg.2197rxn11703	0.946513		COMMON	fig|316407.3.peg.2197	rxn11703	fig|316407.3.peg.2197rxn11703	0.946513
COMMON	fig|316407.3.peg.1929	rxn03538	fig|316407.3.peg.1929rxn03538	0.804497		COMMON	fig|316407.3.peg.1929	rxn03538	fig|316407.3.peg.1929rxn03538	0.804497
COMMON	fig|316407.3.peg.2587	rxn05192	fig|316407.3.peg.2587rxn05192	0.31564		COMMON	fig|316407.3.peg.2587	rxn05192	fig|316407.3.peg.2587rxn05192	0.31564
COMMON	fig|316407.3.peg.336	rxn03038	fig|316407.3.peg.336rxn03038	0.698925		COMMON	fig|316407.3.peg.336	rxn03038	fig|316407.3.peg.336rxn03038	0.698925
COMMON	fig|316407.3.peg.336	rxn04603	fig|316407.3.peg.336rxn04603	0.698925		COMMON	fig|316407.3.peg.336	rxn04603	fig|316407.3.peg.336rxn04603	0.698925
COMMON	fig|316407.3.peg.2976	rxn01122	fig|316407.3.peg.2976rxn01122	0.694317		COMMON	fig|316407.3.peg.2976	rxn01122	fig|316407.3.peg.2976rxn01122	0.694317
COMMON	fig|316407.3.peg.2429	rxn00917	fig|316407.3.peg.2429rxn00917	0.890724		COMMON	fig|316407.3.peg.2429	rxn00917	fig|316407.3.peg.2429rxn00917	0.890724
COMMON	fig|316407.3.peg.4082	rxn05416	fig|316407.3.peg.4082rxn05416	0.415119		COMMON	fig|316407.3.peg.4082	rxn05416	fig|316407.3.peg.4082rxn05416	0.415119
COMMON	fig|316407.3.peg.4082	rxn05412	fig|316407.3.peg.4082rxn05412	0.415119		COMMON	fig|316407.3.peg.4082	rxn05412	fig|316407.3.peg.4082rxn05412	0.415119
COMMON	fig|316407.3.peg.4082	rxn05428	fig|316407.3.peg.4082rxn05428	0.415119		COMMON	fig|316407.3.peg.4082	rxn05428	fig|316407.3.peg.4082rxn05428	0.415119
COMMON	fig|316407.3.peg.4082	rxn01453	fig|316407.3.peg.4082rxn01453	0.0961172		COMMON	fig|316407.3.peg.4082	rxn01453	fig|316407.3.peg.4082rxn01453	0.0961172
COMMON	fig|316407.3.peg.4082	rxn05432	fig|316407.3.peg.4082rxn05432	0.415119		COMMON	fig|316407.3.peg.4082	rxn05432	fig|316407.3.peg.4082rxn05432	0.415119
COMMON	fig|316407.3.peg.4082	rxn05424	fig|316407.3.peg.4082rxn05424	0.415119		COMMON	fig|316407.3.peg.4082	rxn05424	fig|316407.3.peg.4082rxn05424	0.415119
COMMON	fig|316407.3.peg.4082	rxn05420	fig|316407.3.peg.4082rxn05420	0.415119		COMMON	fig|316407.3.peg.4082	rxn05420	fig|316407.3.peg.4082rxn05420	0.415119
COMMON	fig|316407.3.peg.3303	rxn10094	fig|316407.3.peg.3303rxn10094	0.828192		COMMON	fig|316407.3.peg.3303	rxn10094	fig|316407.3.peg.3303rxn10094	0.828192
COMMON	fig|316407.3.peg.3303	rxn03397	fig|316407.3.peg.3303rxn03397	0.828192		COMMON	fig|316407.3.peg.3303	rxn03397	fig|316407.3.peg.3303rxn03397	0.828192
COMMON	fig|316407.3.peg.31	rxn02929	fig|316407.3.peg.31rxn02929	0.442602		COMMON	fig|316407.3.peg.31	rxn02929	fig|316407.3.peg.31rxn02929	0.442602
COMMON	fig|316407.3.peg.1651	rxn01923	fig|316407.3.peg.1651rxn01923	0.334845		COMMON	fig|316407.3.peg.1651	rxn01923	fig|316407.3.peg.1651rxn01923	0.334845
COMMON	fig|316407.3.peg.3215	rxn08333	fig|316407.3.peg.3215rxn08333	0.556595		COMMON	fig|316407.3.peg.3215	rxn08333	fig|316407.3.peg.3215rxn08333	0.556595
COMMON	fig|316407.3.peg.3501	rxn08620	fig|316407.3.peg.3501rxn08620	0.124471		COMMON	fig|316407.3.peg.3501	rxn08620	fig|316407.3.peg.3501rxn08620	0.124471
COMMON	fig|316407.3.peg.3500	rxn08619	fig|316407.3.peg.3500rxn08619	0.591035		COMMON	fig|316407.3.peg.3500	rxn08619	fig|316407.3.peg.3500rxn08619	0.591035
COMMON	fig|316407.3.peg.258	rxn01644	fig|316407.3.peg.258rxn01644	0.0198379		COMMON	fig|316407.3.peg.258	rxn01644	fig|316407.3.peg.258rxn01644	0.0198379
COMMON	fig|316407.3.peg.2892	rxn05416	fig|316407.3.peg.2892rxn05416	0.360898		COMMON	fig|316407.3.peg.2892	rxn05416	fig|316407.3.peg.2892rxn05416	0.360898
COMMON	fig|316407.3.peg.2892	rxn05412	fig|316407.3.peg.2892rxn05412	0.360898		COMMON	fig|316407.3.peg.2892	rxn05412	fig|316407.3.peg.2892rxn05412	0.360898
COMMON	fig|316407.3.peg.2892	rxn05428	fig|316407.3.peg.2892rxn05428	0.360898		COMMON	fig|316407.3.peg.2892	rxn05428	fig|316407.3.peg.2892rxn05428	0.360898
COMMON	fig|316407.3.peg.2892	rxn05432	fig|316407.3.peg.2892rxn05432	0.360898		COMMON	fig|316407.3.peg.2892	rxn05432	fig|316407.3.peg.2892rxn05432	0.360898
COMMON	fig|316407.3.peg.2892	rxn05424	fig|316407.3.peg.2892rxn05424	0.360898		COMMON	fig|316407.3.peg.2892	rxn05424	fig|316407.3.peg.2892rxn05424	0.360898
COMMON	fig|316407.3.peg.2892	rxn05420	fig|316407.3.peg.2892rxn05420	0.360898		COMMON	fig|316407.3.peg.2892	rxn05420	fig|316407.3.peg.2892rxn05420	0.360898
COMMON	fig|316407.3.peg.167	rxn00119	fig|316407.3.peg.167rxn00119	0.952098		COMMON	fig|316407.3.peg.167	rxn00119	fig|316407.3.peg.167rxn00119	0.952098
COMMON	fig|316407.3.peg.2184	rxn03168	fig|316407.3.peg.2184rxn03168	0.0373994		COMMON	fig|316407.3.peg.2184	rxn03168	fig|316407.3.peg.2184rxn03168	0.0373994
COMMON	fig|345073.6.peg.1600	rxn03538	fig|345073.6.peg.1600rxn03538	0.949239		COMMON	fig|345073.6.peg.1600	rxn03538	fig|345073.6.peg.1600rxn03538	0.949239
COMMON	fig|345073.6.peg.1748	rxn03075	fig|345073.6.peg.1748rxn03075	0.000256897		COMMON	fig|345073.6.peg.1748	rxn03075	fig|345073.6.peg.1748rxn03075	0.000256897
COMMON	fig|345073.6.peg.2994	rxn09997	fig|345073.6.peg.2994rxn09997	0.743405		COMMON	fig|345073.6.peg.2994	rxn09997	fig|345073.6.peg.2994rxn09997	0.743405
COMMON	fig|345073.6.peg.936	rxn03856	fig|345073.6.peg.936rxn03856	0.00145726		COMMON	fig|345073.6.peg.936	rxn03856	fig|345073.6.peg.936rxn03856	0.00145726
COMMON	fig|345073.6.peg.3115	rxn01675	fig|345073.6.peg.3115rxn01675	0.0148376		COMMON	fig|345073.6.peg.3115	rxn01675	fig|345073.6.peg.3115rxn01675	0.0148376
COMMON	fig|345073.6.peg.2574	rxn02929	fig|345073.6.peg.2574rxn02929	0.410154		COMMON	fig|345073.6.peg.2574	rxn02929	fig|345073.6.peg.2574rxn02929	0.410154
COMMON	fig|345073.6.peg.2463	rxn01517	fig|345073.6.peg.2463rxn01517	0.959171		COMMON	fig|345073.6.peg.2463	rxn01517	fig|345073.6.peg.2463rxn01517	0.959171
COMMON	fig|345073.6.peg.2463	rxn00119	fig|345073.6.peg.2463rxn00119	0.959171		COMMON	fig|345073.6.peg.2463	rxn00119	fig|345073.6.peg.2463rxn00119	0.959171
COMMON	fig|345073.6.peg.1927	rxn03167	fig|345073.6.peg.1927rxn03167	0.7593		COMMON	fig|345073.6.peg.1927	rxn03167	fig|345073.6.peg.1927rxn03167	0.7593
COMMON	fig|345073.6.peg.2191	rxn03630	fig|345073.6.peg.2191rxn03630	0.00105073		COMMON	fig|345073.6.peg.2191	rxn03630	fig|345073.6.peg.2191rxn03630	0.00105073
COMMON	fig|345073.6.peg.1894	rxn02270	fig|345073.6.peg.1894rxn02270	0.0727562		COMMON	fig|345073.6.peg.1894	rxn02270	fig|345073.6.peg.1894rxn02270	0.0727562
COMMON	fig|345073.6.peg.1241	rxn08618	fig|345073.6.peg.1241rxn08618	0.00130535		COMMON	fig|345073.6.peg.1241	rxn08618	fig|345073.6.peg.1241rxn08618	0.00130535
COMMON	fig|345073.6.peg.2824	rxn08333	fig|345073.6.peg.2824rxn08333	0.555692		COMMON	fig|345073.6.peg.2824	rxn08333	fig|345073.6.peg.2824rxn08333	0.555692
COMMON	fig|345073.6.peg.1354	rxn05407	fig|345073.6.peg.1354rxn05407	0.0661665		COMMON	fig|345073.6.peg.1354	rxn05407	fig|345073.6.peg.1354rxn05407	0.0661665
COMMON	fig|345073.6.peg.1354	rxn05382	fig|345073.6.peg.1354rxn05382	0.0661665		COMMON	fig|345073.6.peg.1354	rxn05382	fig|345073.6.peg.1354rxn05382	0.0661665
COMMON	fig|345073.6.peg.1354	rxn05403	fig|345073.6.peg.1354rxn05403	0.0661665		COMMON	fig|345073.6.peg.1354	rxn05403	fig|345073.6.peg.1354rxn05403	0.0661665
COMMON	fig|345073.6.peg.1354	rxn05387	fig|345073.6.peg.1354rxn05387	0.0661665		COMMON	fig|345073.6.peg.1354	rxn05387	fig|345073.6.peg.1354rxn05387	0.0661665
COMMON	fig|345073.6.peg.1354	rxn05374	fig|345073.6.peg.1354rxn05374	0.0661665		COMMON	fig|345073.6.peg.1354	rxn05374	fig|345073.6.peg.1354rxn05374	0.0661665
COMMON	fig|345073.6.peg.1354	rxn05399	fig|345073.6.peg.1354rxn05399	0.0661665		COMMON	fig|345073.6.peg.1354	rxn05399	fig|345073.6.peg.1354rxn05399	0.0661665
COMMON	fig|345073.6.peg.1354	rxn05366	fig|345073.6.peg.1354rxn05366	0.0661665		COMMON	fig|345073.6.peg.1354	rxn05366	fig|345073.6.peg.1354rxn05366	0.0661665
COMMON	fig|345073.6.peg.1354	rxn05391	fig|345073.6.peg.1354rxn05391	0.0661665		COMMON	fig|345073.6.peg.1354	rxn05391	fig|345073.6.peg.1354rxn05391	0.0661665
COMMON	fig|345073.6.peg.1354	rxn05370	fig|345073.6.peg.1354rxn05370	0.0661665		COMMON	fig|345073.6.peg.1354	rxn05370	fig|345073.6.peg.1354rxn05370	0.0661665
COMMON	fig|345073.6.peg.1354	rxn05356	fig|345073.6.peg.1354rxn05356	0.0661665		COMMON	fig|345073.6.peg.1354	rxn05356	fig|345073.6.peg.1354rxn05356	0.0661665
COMMON	fig|345073.6.peg.1354	rxn05355	fig|345073.6.peg.1354rxn05355	0.0661665		COMMON	fig|345073.6.peg.1354	rxn05355	fig|345073.6.peg.1354rxn05355	0.0661665
COMMON	fig|345073.6.peg.1354	rxn05354	fig|345073.6.peg.1354rxn05354	0.0661665		COMMON	fig|345073.6.peg.1354	rxn05354	fig|345073.6.peg.1354rxn05354	0.0661665
COMMON	fig|345073.6.peg.1354	rxn05353	fig|345073.6.peg.1354rxn05353	0.0661665		COMMON	fig|345073.6.peg.1354	rxn05353	fig|345073.6.peg.1354rxn05353	0.0661665
COMMON	fig|345073.6.peg.1354	rxn05352	fig|345073.6.peg.1354rxn05352	0.0661665		COMMON	fig|345073.6.peg.1354	rxn05352	fig|345073.6.peg.1354rxn05352	0.0661665
COMMON	fig|345073.6.peg.1354	rxn05351	fig|345073.6.peg.1354rxn05351	0.0661665		COMMON	fig|345073.6.peg.1354	rxn05351	fig|345073.6.peg.1354rxn05351	0.0661665
COMMON	fig|345073.6.peg.330	rxn00577	fig|345073.6.peg.330rxn00577	0.000780916		COMMON	fig|345073.6.peg.330	rxn00577	fig|345073.6.peg.330rxn00577	0.000780916
COMMON	fig|345073.6.peg.2849	rxn00022	fig|345073.6.peg.2849rxn00022	0.298306		COMMON	fig|345073.6.peg.2849	rxn00022	fig|345073.6.peg.2849rxn00022	0.298306
COMMON	fig|345073.6.peg.751	rxn02321	fig|345073.6.peg.751rxn02321	0.031734		COMMON	fig|345073.6.peg.751	rxn02321	fig|345073.6.peg.751rxn02321	0.031734
COMMON	fig|345073.6.peg.1615	rxn11946	fig|345073.6.peg.1615rxn11946	0.258487		COMMON	fig|345073.6.peg.1615	rxn11946	fig|345073.6.peg.1615rxn11946	0.258487
COMMON	fig|345073.6.peg.1615	rxn03395	fig|345073.6.peg.1615rxn03395	0.258487		COMMON	fig|345073.6.peg.1615	rxn03395	fig|345073.6.peg.1615rxn03395	0.258487
COMMON	fig|345073.6.peg.645	rxn01022	fig|345073.6.peg.645rxn01022	0.357655		COMMON	fig|345073.6.peg.645	rxn01022	fig|345073.6.peg.645rxn01022	0.357655
COMMON	fig|345073.6.peg.476	rxn01204	fig|345073.6.peg.476rxn01204	0.128592		COMMON	fig|345073.6.peg.476	rxn01204	fig|345073.6.peg.476rxn01204	0.128592
COMMON	fig|345073.6.peg.2032	rxn00509	fig|345073.6.peg.2032rxn00509	0.187407		COMMON	fig|345073.6.peg.2032	rxn00509	fig|345073.6.peg.2032rxn00509	0.187407
COMMON	fig|345073.6.peg.2032	rxn00979	fig|345073.6.peg.2032rxn00979	0.0558206		COMMON	fig|345073.6.peg.2032	rxn00979	fig|345073.6.peg.2032rxn00979	0.0558206
COMMON	fig|345073.6.peg.2019	rxn01895	fig|345073.6.peg.2019rxn01895	0.00454758		COMMON	fig|345073.6.peg.2019	rxn01895	fig|345073.6.peg.2019rxn01895	0.00454758
COMMON	fig|345073.6.peg.2019	rxn02483	fig|345073.6.peg.2019rxn02483	0.0139666		COMMON	fig|345073.6.peg.2019	rxn02483	fig|345073.6.peg.2019rxn02483	0.0139666
COMMON	fig|345073.6.peg.2019	rxn09953	fig|345073.6.peg.2019rxn09953	0.0249927		COMMON	fig|345073.6.peg.2019	rxn09953	fig|345073.6.peg.2019rxn09953	0.0249927
COMMON	fig|345073.6.peg.741	rxn03030	fig|345073.6.peg.741rxn03030	0.252048		COMMON	fig|345073.6.peg.741	rxn03030	fig|345073.6.peg.741rxn03030	0.252048
COMMON	fig|345073.6.peg.2215	rxn11703	fig|345073.6.peg.2215rxn11703	0.864282		COMMON	fig|345073.6.peg.2215	rxn11703	fig|345073.6.peg.2215rxn11703	0.864282
COMMON	fig|345073.6.peg.1961	rxn05159	fig|345073.6.peg.1961rxn05159	0.00378115		COMMON	fig|345073.6.peg.1961	rxn05159	fig|345073.6.peg.1961rxn05159	0.00378115
COMMON	fig|345073.6.peg.1094	rxn01303	fig|345073.6.peg.1094rxn01303	0.031991		COMMON	fig|345073.6.peg.1094	rxn01303	fig|345073.6.peg.1094rxn01303	0.031991
COMMON	fig|345073.6.peg.1849	rxn01169	fig|345073.6.peg.1849rxn01169	0.371316		COMMON	fig|345073.6.peg.1849	rxn01169	fig|345073.6.peg.1849rxn01169	0.371316
COMMON	fig|345073.6.peg.2454	rxn05381	fig|345073.6.peg.2454rxn05381	0.722511		COMMON	fig|345073.6.peg.2454	rxn05381	fig|345073.6.peg.2454rxn05381	0.722511
COMMON	fig|345073.6.peg.2454	rxn05390	fig|345073.6.peg.2454rxn05390	0.722511		COMMON	fig|345073.6.peg.2454	rxn05390	fig|345073.6.peg.2454rxn05390	0.722511
COMMON	fig|345073.6.peg.2454	rxn05402	fig|345073.6.peg.2454rxn05402	0.722511		COMMON	fig|345073.6.peg.2454	rxn05402	fig|345073.6.peg.2454rxn05402	0.722511
COMMON	fig|345073.6.peg.2454	rxn05386	fig|345073.6.peg.2454rxn05386	0.722511		COMMON	fig|345073.6.peg.2454	rxn05386	fig|345073.6.peg.2454rxn05386	0.722511
COMMON	fig|345073.6.peg.2454	rxn05394	fig|345073.6.peg.2454rxn05394	0.722511		COMMON	fig|345073.6.peg.2454	rxn05394	fig|345073.6.peg.2454rxn05394	0.722511
COMMON	fig|345073.6.peg.2454	rxn05377	fig|345073.6.peg.2454rxn05377	0.722511		COMMON	fig|345073.6.peg.2454	rxn05377	fig|345073.6.peg.2454rxn05377	0.722511
COMMON	fig|345073.6.peg.2454	rxn05398	fig|345073.6.peg.2454rxn05398	0.722511		COMMON	fig|345073.6.peg.2454	rxn05398	fig|345073.6.peg.2454rxn05398	0.722511
COMMON	fig|345073.6.peg.2454	rxn05373	fig|345073.6.peg.2454rxn05373	0.722511		COMMON	fig|345073.6.peg.2454	rxn05373	fig|345073.6.peg.2454rxn05373	0.722511
COMMON	fig|345073.6.peg.2454	rxn05365	fig|345073.6.peg.2454rxn05365	0.722511		COMMON	fig|345073.6.peg.2454	rxn05365	fig|345073.6.peg.2454rxn05365	0.722511
COMMON	fig|345073.6.peg.2454	rxn05462	fig|345073.6.peg.2454rxn05462	0.722511		COMMON	fig|345073.6.peg.2454	rxn05462	fig|345073.6.peg.2454rxn05462	0.722511
COMMON	fig|345073.6.peg.2454	rxn05369	fig|345073.6.peg.2454rxn05369	0.722511		COMMON	fig|345073.6.peg.2454	rxn05369	fig|345073.6.peg.2454rxn05369	0.722511
COMMON	fig|345073.6.peg.2454	rxn05406	fig|345073.6.peg.2454rxn05406	0.722511		COMMON	fig|345073.6.peg.2454	rxn05406	fig|345073.6.peg.2454rxn05406	0.722511
COMMON	fig|345073.6.peg.2454	rxn05361	fig|345073.6.peg.2454rxn05361	0.722511		COMMON	fig|345073.6.peg.2454	rxn05361	fig|345073.6.peg.2454rxn05361	0.722511
COMMON	fig|345073.6.peg.582	rxn03513	fig|345073.6.peg.582rxn03513	0.0056164		COMMON	fig|345073.6.peg.582	rxn03513	fig|345073.6.peg.582rxn03513	0.0056164
COMMON	fig|345073.6.peg.582	rxn03540	fig|345073.6.peg.582rxn03540	0.744114		COMMON	fig|345073.6.peg.582	rxn03540	fig|345073.6.peg.582rxn03540	0.744114
COMMON	fig|345073.6.peg.2281	rxn03886	fig|345073.6.peg.2281rxn03886	0.0199876		COMMON	fig|345073.6.peg.2281	rxn03886	fig|345073.6.peg.2281rxn03886	0.0199876
COMMON	fig|345073.6.peg.2974	rxn03397	fig|345073.6.peg.2974rxn03397	0.822053		COMMON	fig|345073.6.peg.2974	rxn03397	fig|345073.6.peg.2974rxn03397	0.822053
COMMON	fig|345073.6.peg.2974	rxn10094	fig|345073.6.peg.2974rxn10094	0.822053		COMMON	fig|345073.6.peg.2974	rxn10094	fig|345073.6.peg.2974rxn10094	0.822053
COMMON	fig|345073.6.peg.1988	rxn00817	fig|345073.6.peg.1988rxn00817	0.879057		COMMON	fig|345073.6.peg.1988	rxn00817	fig|345073.6.peg.1988rxn00817	0.879057
COMMON	fig|401614.5.peg.1480	rxn00802	fig|401614.5.peg.1480rxn00802	0.829523		COMMON	fig|401614.5.peg.1480	rxn00802	fig|401614.5.peg.1480rxn00802	0.829523
COMMON	fig|401614.5.peg.694	rxn05029	fig|401614.5.peg.694rxn05029	0.183673		COMMON	fig|401614.5.peg.694	rxn05029	fig|401614.5.peg.694rxn05029	0.183673
COMMON	fig|401614.5.peg.1098	rxn00566	fig|401614.5.peg.1098rxn00566	0.0349394		COMMON	fig|401614.5.peg.1098	rxn00566	fig|401614.5.peg.1098rxn00566	0.0349394
COMMON	fig|401614.5.peg.1098	rxn09310	fig|401614.5.peg.1098rxn09310	0.211241		COMMON	fig|401614.5.peg.1098	rxn09310	fig|401614.5.peg.1098rxn09310	0.211241
COMMON	fig|401614.5.peg.451	rxn05466	fig|401614.5.peg.451rxn05466	0.0143007		COMMON	fig|401614.5.peg.451	rxn05466	fig|401614.5.peg.451rxn05466	0.0143007
COMMON	fig|401614.5.peg.343	rxn00493	fig|401614.5.peg.343rxn00493	0.044221		COMMON	fig|401614.5.peg.343	rxn00493	fig|401614.5.peg.343rxn00493	0.044221
COMMON	fig|401614.5.peg.343	rxn03086	fig|401614.5.peg.343rxn03086	0.118889		COMMON	fig|401614.5.peg.343	rxn03086	fig|401614.5.peg.343rxn03086	0.118889
COMMON	fig|401614.5.peg.1726	rxn00763	fig|401614.5.peg.1726rxn00763	0.267111		COMMON	fig|401614.5.peg.1726	rxn00763	fig|401614.5.peg.1726rxn00763	0.267111
COMMON	fig|401614.5.peg.1237	rxn08619	fig|401614.5.peg.1237rxn08619	0.17675		COMMON	fig|401614.5.peg.1237	rxn08619	fig|401614.5.peg.1237rxn08619	0.17675
COMMON	fig|401614.5.peg.1237	rxn08620	fig|401614.5.peg.1237rxn08620	0.29181		COMMON	fig|401614.5.peg.1237	rxn08620	fig|401614.5.peg.1237rxn08620	0.29181
COMMON	fig|401614.5.peg.955	rxn01973	fig|401614.5.peg.955rxn01973	0.000317374		COMMON	fig|401614.5.peg.955	rxn01973	fig|401614.5.peg.955rxn01973	0.000317374
COMMON	fig|401614.5.peg.1376	rxn03919	fig|401614.5.peg.1376rxn03919	0.000942098		COMMON	fig|401614.5.peg.1376	rxn03919	fig|401614.5.peg.1376rxn03919	0.000942098
COMMON	fig|401614.5.peg.1378	rxn05159	fig|401614.5.peg.1378rxn05159	0.00510235		COMMON	fig|401614.5.peg.1378	rxn05159	fig|401614.5.peg.1378rxn05159	0.00510235
COMMON	fig|401614.5.peg.1258	rxn03075	fig|401614.5.peg.1258rxn03075	0.000938321		COMMON	fig|401614.5.peg.1258	rxn03075	fig|401614.5.peg.1258rxn03075	0.000938321
COMMON	fig|401614.5.peg.1401	rxn03030	fig|401614.5.peg.1401rxn03030	0.0503734		COMMON	fig|401614.5.peg.1401	rxn03030	fig|401614.5.peg.1401rxn03030	0.0503734
COMMON	fig|401614.5.peg.1350	rxn00693	fig|401614.5.peg.1350rxn00693	0.0796133		COMMON	fig|401614.5.peg.1350	rxn00693	fig|401614.5.peg.1350rxn00693	0.0796133
COMMON	fig|401614.5.peg.1692	rxn01644	fig|401614.5.peg.1692rxn01644	0.0193834		COMMON	fig|401614.5.peg.1692	rxn01644	fig|401614.5.peg.1692rxn01644	0.0193834
COMMON	fig|401614.5.peg.1693	rxn02929	fig|401614.5.peg.1693rxn02929	0.158715		COMMON	fig|401614.5.peg.1693	rxn02929	fig|401614.5.peg.1693rxn02929	0.158715
COMMON	fig|401614.5.peg.881	rxn01094	fig|401614.5.peg.881rxn01094	0.00313326		COMMON	fig|401614.5.peg.881	rxn01094	fig|401614.5.peg.881rxn01094	0.00313326
COMMON	fig|401614.5.peg.768	rxn02155	fig|401614.5.peg.768rxn02155	0.0941013		COMMON	fig|401614.5.peg.768	rxn02155	fig|401614.5.peg.768rxn02155	0.0941013
COMMON	fig|401614.5.peg.1450	rxn05381	fig|401614.5.peg.1450rxn05381	0.652468		COMMON	fig|401614.5.peg.1450	rxn05381	fig|401614.5.peg.1450rxn05381	0.652468
COMMON	fig|401614.5.peg.1450	rxn05390	fig|401614.5.peg.1450rxn05390	0.652468		COMMON	fig|401614.5.peg.1450	rxn05390	fig|401614.5.peg.1450rxn05390	0.652468
COMMON	fig|401614.5.peg.1450	rxn05402	fig|401614.5.peg.1450rxn05402	0.652468		COMMON	fig|401614.5.peg.1450	rxn05402	fig|401614.5.peg.1450rxn05402	0.652468
COMMON	fig|401614.5.peg.1450	rxn05386	fig|401614.5.peg.1450rxn05386	0.652468		COMMON	fig|401614.5.peg.1450	rxn05386	fig|401614.5.peg.1450rxn05386	0.652468
COMMON	fig|401614.5.peg.1450	rxn05394	fig|401614.5.peg.1450rxn05394	0.652468		COMMON	fig|401614.5.peg.1450	rxn05394	fig|401614.5.peg.1450rxn05394	0.652468
COMMON	fig|401614.5.peg.1450	rxn05377	fig|401614.5.peg.1450rxn05377	0.652468		COMMON	fig|401614.5.peg.1450	rxn05377	fig|401614.5.peg.1450rxn05377	0.652468
COMMON	fig|401614.5.peg.1450	rxn05398	fig|401614.5.peg.1450rxn05398	0.652468		COMMON	fig|401614.5.peg.1450	rxn05398	fig|401614.5.peg.1450rxn05398	0.652468
COMMON	fig|401614.5.peg.1450	rxn05332	fig|401614.5.peg.1450rxn05332	0.652468		COMMON	fig|401614.5.peg.1450	rxn05332	fig|401614.5.peg.1450rxn05332	0.652468
COMMON	fig|401614.5.peg.1450	rxn05373	fig|401614.5.peg.1450rxn05373	0.652468		COMMON	fig|401614.5.peg.1450	rxn05373	fig|401614.5.peg.1450rxn05373	0.652468
COMMON	fig|401614.5.peg.1450	rxn05369	fig|401614.5.peg.1450rxn05369	0.652468		COMMON	fig|401614.5.peg.1450	rxn05369	fig|401614.5.peg.1450rxn05369	0.652468
COMMON	fig|401614.5.peg.1450	rxn05331	fig|401614.5.peg.1450rxn05331	0.652468		COMMON	fig|401614.5.peg.1450	rxn05331	fig|401614.5.peg.1450rxn05331	0.652468
COMMON	fig|401614.5.peg.1450	rxn05330	fig|401614.5.peg.1450rxn05330	0.652468		COMMON	fig|401614.5.peg.1450	rxn05330	fig|401614.5.peg.1450rxn05330	0.652468
COMMON	fig|401614.5.peg.1450	rxn05333	fig|401614.5.peg.1450rxn05333	0.652468		COMMON	fig|401614.5.peg.1450	rxn05333	fig|401614.5.peg.1450rxn05333	0.652468
COMMON	fig|401614.5.peg.1450	rxn05462	fig|401614.5.peg.1450rxn05462	0.652468		COMMON	fig|401614.5.peg.1450	rxn05462	fig|401614.5.peg.1450rxn05462	0.652468
COMMON	fig|401614.5.peg.1450	rxn05335	fig|401614.5.peg.1450rxn05335	0.652468		COMMON	fig|401614.5.peg.1450	rxn05335	fig|401614.5.peg.1450rxn05335	0.652468
COMMON	fig|401614.5.peg.1450	rxn05334	fig|401614.5.peg.1450rxn05334	0.652468		COMMON	fig|401614.5.peg.1450	rxn05334	fig|401614.5.peg.1450rxn05334	0.652468
COMMON	fig|401614.5.peg.1450	rxn05329	fig|401614.5.peg.1450rxn05329	0.652468		COMMON	fig|401614.5.peg.1450	rxn05329	fig|401614.5.peg.1450rxn05329	0.652468
COMMON	fig|401614.5.peg.1450	rxn05406	fig|401614.5.peg.1450rxn05406	0.652468		COMMON	fig|401614.5.peg.1450	rxn05406	fig|401614.5.peg.1450rxn05406	0.652468
COMMON	fig|401614.5.peg.1450	rxn05365	fig|401614.5.peg.1450rxn05365	0.652468		COMMON	fig|401614.5.peg.1450	rxn05365	fig|401614.5.peg.1450rxn05365	0.652468
COMMON	fig|401614.5.peg.1450	rxn05361	fig|401614.5.peg.1450rxn05361	0.652468		COMMON	fig|401614.5.peg.1450	rxn05361	fig|401614.5.peg.1450rxn05361	0.652468
COMMON	fig|401614.5.peg.456	rxn05466	fig|401614.5.peg.456rxn05466	0.0164926		COMMON	fig|401614.5.peg.456	rxn05466	fig|401614.5.peg.456rxn05466	0.0164926
COMMON	fig|401614.5.peg.1395	rxn08618	fig|401614.5.peg.1395rxn08618	0.0224867		COMMON	fig|401614.5.peg.1395	rxn08618	fig|401614.5.peg.1395rxn08618	0.0224867
COMMON	fig|401614.5.peg.1113	rxn05416	fig|401614.5.peg.1113rxn05416	0.204972		COMMON	fig|401614.5.peg.1113	rxn05416	fig|401614.5.peg.1113rxn05416	0.204972
COMMON	fig|401614.5.peg.1113	rxn05412	fig|401614.5.peg.1113rxn05412	0.204972		COMMON	fig|401614.5.peg.1113	rxn05412	fig|401614.5.peg.1113rxn05412	0.204972
COMMON	fig|401614.5.peg.1113	rxn05357	fig|401614.5.peg.1113rxn05357	0.204972		COMMON	fig|401614.5.peg.1113	rxn05357	fig|401614.5.peg.1113rxn05357	0.204972
COMMON	fig|401614.5.peg.1113	rxn05353	fig|401614.5.peg.1113rxn05353	0.204972		COMMON	fig|401614.5.peg.1113	rxn05353	fig|401614.5.peg.1113rxn05353	0.204972
COMMON	fig|401614.5.peg.1113	rxn05352	fig|401614.5.peg.1113rxn05352	0.204972		COMMON	fig|401614.5.peg.1113	rxn05352	fig|401614.5.peg.1113rxn05352	0.204972
COMMON	fig|401614.5.peg.1113	rxn05432	fig|401614.5.peg.1113rxn05432	0.204972		COMMON	fig|401614.5.peg.1113	rxn05432	fig|401614.5.peg.1113rxn05432	0.204972
COMMON	fig|401614.5.peg.1113	rxn05424	fig|401614.5.peg.1113rxn05424	0.204972		COMMON	fig|401614.5.peg.1113	rxn05424	fig|401614.5.peg.1113rxn05424	0.204972
COMMON	fig|401614.5.peg.1113	rxn05420	fig|401614.5.peg.1113rxn05420	0.204972		COMMON	fig|401614.5.peg.1113	rxn05420	fig|401614.5.peg.1113rxn05420	0.204972
COMMON	fig|401614.5.peg.1113	rxn05428	fig|401614.5.peg.1113rxn05428	0.204972		COMMON	fig|401614.5.peg.1113	rxn05428	fig|401614.5.peg.1113rxn05428	0.204972
COMMON	fig|401614.5.peg.1677	rxn05549	fig|401614.5.peg.1677rxn05549	0.00414466		COMMON	fig|401614.5.peg.1677	rxn05549	fig|401614.5.peg.1677rxn05549	0.00414466
COMMON	fig|401614.5.peg.1155	rxn01972	fig|401614.5.peg.1155rxn01972	0.801991		COMMON	fig|401614.5.peg.1155	rxn01972	fig|401614.5.peg.1155rxn01972	0.801991
COMMON	fig|401614.5.peg.1715	rxn10214	fig|401614.5.peg.1715rxn10214	0.835515		COMMON	fig|401614.5.peg.1715	rxn10214	fig|401614.5.peg.1715rxn10214	0.835515
COMMON	fig|401614.5.peg.1715	rxn10215	fig|401614.5.peg.1715rxn10215	0.835515		COMMON	fig|401614.5.peg.1715	rxn10215	fig|401614.5.peg.1715rxn10215	0.835515
COMMON	fig|401614.5.peg.1715	rxn08085	fig|401614.5.peg.1715rxn08085	0.835515		COMMON	fig|401614.5.peg.1715	rxn08085	fig|401614.5.peg.1715rxn08085	0.835515
COMMON	fig|401614.5.peg.1715	rxn10211	fig|401614.5.peg.1715rxn10211	0.835515		COMMON	fig|401614.5.peg.1715	rxn10211	fig|401614.5.peg.1715rxn10211	0.835515
COMMON	fig|401614.5.peg.1715	rxn10213	fig|401614.5.peg.1715rxn10213	0.835515		COMMON	fig|401614.5.peg.1715	rxn10213	fig|401614.5.peg.1715rxn10213	0.835515
COMMON	fig|401614.5.peg.1714	rxn10214	fig|401614.5.peg.1714rxn10214	0.857822		COMMON	fig|401614.5.peg.1714	rxn10214	fig|401614.5.peg.1714rxn10214	0.857822
COMMON	fig|401614.5.peg.1714	rxn10215	fig|401614.5.peg.1714rxn10215	0.857822		COMMON	fig|401614.5.peg.1714	rxn10215	fig|401614.5.peg.1714rxn10215	0.857822
COMMON	fig|401614.5.peg.1714	rxn08085	fig|401614.5.peg.1714rxn08085	0.857822		COMMON	fig|401614.5.peg.1714	rxn08085	fig|401614.5.peg.1714rxn08085	0.857822
COMMON	fig|401614.5.peg.1714	rxn10211	fig|401614.5.peg.1714rxn10211	0.857822		COMMON	fig|401614.5.peg.1714	rxn10211	fig|401614.5.peg.1714rxn10211	0.857822
COMMON	fig|401614.5.peg.1714	rxn10213	fig|401614.5.peg.1714rxn10213	0.857822		COMMON	fig|401614.5.peg.1714	rxn10213	fig|401614.5.peg.1714rxn10213	0.857822
COMMON	fig|401614.5.peg.583	rxn00802	fig|401614.5.peg.583rxn00802	0.664527		COMMON	fig|401614.5.peg.583	rxn00802	fig|401614.5.peg.583rxn00802	0.664527
COMMON	fig|401614.5.peg.1009	rxn04082	fig|401614.5.peg.1009rxn04082	0.531103		COMMON	fig|401614.5.peg.1009	rxn04082	fig|401614.5.peg.1009rxn04082	0.531103
COMMON	fig|401614.5.peg.1009	rxn05104	fig|401614.5.peg.1009rxn05104	0.0203736		COMMON	fig|401614.5.peg.1009	rxn05104	fig|401614.5.peg.1009rxn05104	0.0203736
COMMON	fig|401614.5.peg.1194	rxn08713	fig|401614.5.peg.1194rxn08713	0.0689613		COMMON	fig|401614.5.peg.1194	rxn08713	fig|401614.5.peg.1194rxn08713	0.0689613
COMMON	fig|401614.5.peg.232	rxn00119	fig|401614.5.peg.232rxn00119	0.945185		COMMON	fig|401614.5.peg.232	rxn00119	fig|401614.5.peg.232rxn00119	0.945185
COMMON	fig|401614.5.peg.418	rxn03175	fig|401614.5.peg.418rxn03175	0.221759		COMMON	fig|401614.5.peg.418	rxn03175	fig|401614.5.peg.418rxn03175	0.221759
COMMON	fig|401614.5.peg.1346	rxn02264	fig|401614.5.peg.1346rxn02264	0.00996157		COMMON	fig|401614.5.peg.1346	rxn02264	fig|401614.5.peg.1346rxn02264	0.00996157
COMMON	fig|401614.5.peg.1260	rxn00138	fig|401614.5.peg.1260rxn00138	0.74713		COMMON	fig|401614.5.peg.1260	rxn00138	fig|401614.5.peg.1260rxn00138	0.74713
COMMON	fig|401614.5.peg.734	rxn00420	fig|401614.5.peg.734rxn00420	0.365095		COMMON	fig|401614.5.peg.734	rxn00420	fig|401614.5.peg.734rxn00420	0.365095
COMMON	fig|401614.5.peg.322	rxn11946	fig|401614.5.peg.322rxn11946	0.254525		COMMON	fig|401614.5.peg.322	rxn11946	fig|401614.5.peg.322rxn11946	0.254525
COMMON	fig|401614.5.peg.322	rxn03395	fig|401614.5.peg.322rxn03395	0.254525		COMMON	fig|401614.5.peg.322	rxn03395	fig|401614.5.peg.322rxn03395	0.254525
COMMON	fig|401614.5.peg.126	rxn00509	fig|401614.5.peg.126rxn00509	0.186809		COMMON	fig|401614.5.peg.126	rxn00509	fig|401614.5.peg.126rxn00509	0.186809
COMMON	fig|401614.5.peg.126	rxn00979	fig|401614.5.peg.126rxn00979	0.0494529		COMMON	fig|401614.5.peg.126	rxn00979	fig|401614.5.peg.126rxn00979	0.0494529
COMMON	fig|401614.5.peg.1164	rxn01453	fig|401614.5.peg.1164rxn01453	0.0858429		COMMON	fig|401614.5.peg.1164	rxn01453	fig|401614.5.peg.1164rxn01453	0.0858429
COMMON	fig|401614.5.peg.1386	rxn02449	fig|401614.5.peg.1386rxn02449	0.162326		COMMON	fig|401614.5.peg.1386	rxn02449	fig|401614.5.peg.1386rxn02449	0.162326
COMMON	fig|401614.5.peg.282	rxn05937	fig|401614.5.peg.282rxn05937	0.131689		COMMON	fig|401614.5.peg.282	rxn05937	fig|401614.5.peg.282rxn05937	0.131689
COMMON	fig|62977.3.peg.3240	rxn01644	fig|62977.3.peg.3240rxn01644	0.026833		COMMON	fig|62977.3.peg.3240	rxn01644	fig|62977.3.peg.3240rxn01644	0.026833
COMMON	fig|62977.3.peg.2256	rxn03919	fig|62977.3.peg.2256rxn03919	0.010324		COMMON	fig|62977.3.peg.2256	rxn03919	fig|62977.3.peg.2256rxn03919	0.010324
COMMON	fig|62977.3.peg.2256	rxn00641	fig|62977.3.peg.2256rxn00641	0.147564		COMMON	fig|62977.3.peg.2256	rxn00641	fig|62977.3.peg.2256rxn00641	0.147564
COMMON	fig|62977.3.peg.2752	rxn02449	fig|62977.3.peg.2752rxn02449	0.121695		COMMON	fig|62977.3.peg.2752	rxn02449	fig|62977.3.peg.2752rxn02449	0.121695
COMMON	fig|62977.3.peg.1265	rxn08618	fig|62977.3.peg.1265rxn08618	0.0996862		COMMON	fig|62977.3.peg.1265	rxn08618	fig|62977.3.peg.1265rxn08618	0.0996862
COMMON	fig|62977.3.peg.2543	rxn06023	fig|62977.3.peg.2543rxn06023	0.197527		COMMON	fig|62977.3.peg.2543	rxn06023	fig|62977.3.peg.2543rxn06023	0.197527
COMMON	fig|62977.3.peg.1428	rxn00986	fig|62977.3.peg.1428rxn00986	0.980874		COMMON	fig|62977.3.peg.1428	rxn00986	fig|62977.3.peg.1428rxn00986	0.980874
COMMON	fig|62977.3.peg.2790	rxn02155	fig|62977.3.peg.2790rxn02155	0.0321424		COMMON	fig|62977.3.peg.2790	rxn02155	fig|62977.3.peg.2790rxn02155	0.0321424
COMMON	fig|62977.3.peg.2298	rxn03886	fig|62977.3.peg.2298rxn03886	0.0115179		COMMON	fig|62977.3.peg.2298	rxn03886	fig|62977.3.peg.2298rxn03886	0.0115179
COMMON	fig|62977.3.peg.15	rxn00211	fig|62977.3.peg.15rxn00211	0.885957		COMMON	fig|62977.3.peg.15	rxn00211	fig|62977.3.peg.15rxn00211	0.885957
COMMON	fig|62977.3.peg.10	rxn03030	fig|62977.3.peg.10rxn03030	0.630293		COMMON	fig|62977.3.peg.10	rxn03030	fig|62977.3.peg.10rxn03030	0.630293
COMMON	fig|62977.3.peg.1423	rxn00986	fig|62977.3.peg.1423rxn00986	0.980861		COMMON	fig|62977.3.peg.1423	rxn00986	fig|62977.3.peg.1423rxn00986	0.980861
COMMON	fig|62977.3.peg.1268	rxn08713	fig|62977.3.peg.1268rxn08713	0.106503		COMMON	fig|62977.3.peg.1268	rxn08713	fig|62977.3.peg.1268rxn08713	0.106503
COMMON	fig|62977.3.peg.3112	rxn00979	fig|62977.3.peg.3112rxn00979	0.0970426		COMMON	fig|62977.3.peg.3112	rxn00979	fig|62977.3.peg.3112rxn00979	0.0970426
COMMON	fig|62977.3.peg.2532	rxn01094	fig|62977.3.peg.2532rxn01094	0.118418		COMMON	fig|62977.3.peg.2532	rxn01094	fig|62977.3.peg.2532rxn01094	0.118418
COMMON	fig|62977.3.peg.1527	rxn01476	fig|62977.3.peg.1527rxn01476	0.455026		COMMON	fig|62977.3.peg.1527	rxn01476	fig|62977.3.peg.1527rxn01476	0.455026
COMMON	fig|62977.3.peg.3119	rxn01537	fig|62977.3.peg.3119rxn01537	0.276114		COMMON	fig|62977.3.peg.3119	rxn01537	fig|62977.3.peg.3119rxn01537	0.276114
COMMON	fig|62977.3.peg.2920	rxn00917	fig|62977.3.peg.2920rxn00917	0.840216		COMMON	fig|62977.3.peg.2920	rxn00917	fig|62977.3.peg.2920rxn00917	0.840216
COMMON	fig|62977.3.peg.617	rxn09997	fig|62977.3.peg.617rxn09997	0.727418		COMMON	fig|62977.3.peg.617	rxn09997	fig|62977.3.peg.617rxn09997	0.727418
COMMON	fig|62977.3.peg.349	rxn05549	fig|62977.3.peg.349rxn05549	0.117684		COMMON	fig|62977.3.peg.349	rxn05549	fig|62977.3.peg.349rxn05549	0.117684
COMMON	fig|62977.3.peg.170	rxn01640	fig|62977.3.peg.170rxn01640	0.0179233		COMMON	fig|62977.3.peg.170	rxn01640	fig|62977.3.peg.170rxn01640	0.0179233
COMMON	fig|62977.3.peg.1033	rxn05416	fig|62977.3.peg.1033rxn05416	0.307588		COMMON	fig|62977.3.peg.1033	rxn05416	fig|62977.3.peg.1033rxn05416	0.307588
COMMON	fig|62977.3.peg.1033	rxn05412	fig|62977.3.peg.1033rxn05412	0.307588		COMMON	fig|62977.3.peg.1033	rxn05412	fig|62977.3.peg.1033rxn05412	0.307588
COMMON	fig|62977.3.peg.1033	rxn05357	fig|62977.3.peg.1033rxn05357	0.307588		COMMON	fig|62977.3.peg.1033	rxn05357	fig|62977.3.peg.1033rxn05357	0.307588
COMMON	fig|62977.3.peg.1033	rxn05353	fig|62977.3.peg.1033rxn05353	0.307588		COMMON	fig|62977.3.peg.1033	rxn05353	fig|62977.3.peg.1033rxn05353	0.307588
COMMON	fig|62977.3.peg.1033	rxn05352	fig|62977.3.peg.1033rxn05352	0.307588		COMMON	fig|62977.3.peg.1033	rxn05352	fig|62977.3.peg.1033rxn05352	0.307588
COMMON	fig|62977.3.peg.1033	rxn05432	fig|62977.3.peg.1033rxn05432	0.307588		COMMON	fig|62977.3.peg.1033	rxn05432	fig|62977.3.peg.1033rxn05432	0.307588
COMMON	fig|62977.3.peg.1033	rxn05424	fig|62977.3.peg.1033rxn05424	0.307588		COMMON	fig|62977.3.peg.1033	rxn05424	fig|62977.3.peg.1033rxn05424	0.307588
COMMON	fig|62977.3.peg.1033	rxn05420	fig|62977.3.peg.1033rxn05420	0.307588		COMMON	fig|62977.3.peg.1033	rxn05420	fig|62977.3.peg.1033rxn05420	0.307588
COMMON	fig|62977.3.peg.1033	rxn05428	fig|62977.3.peg.1033rxn05428	0.307588		COMMON	fig|62977.3.peg.1033	rxn05428	fig|62977.3.peg.1033rxn05428	0.307588
COMMON	fig|62977.3.peg.279	rxn05029	fig|62977.3.peg.279rxn05029	0.977519		COMMON	fig|62977.3.peg.279	rxn05029	fig|62977.3.peg.279rxn05029	0.977519
COMMON	fig|62977.3.peg.6	rxn08583	fig|62977.3.peg.6rxn08583	0.00389991		COMMON	fig|62977.3.peg.6	rxn08583	fig|62977.3.peg.6rxn08583	0.00389991
COMMON	fig|62977.3.peg.587	rxn09128	fig|62977.3.peg.587rxn09128	0.985302		COMMON	fig|62977.3.peg.587	rxn09128	fig|62977.3.peg.587rxn09128	0.985302
COMMON	fig|62977.3.peg.587	rxn09129	fig|62977.3.peg.587rxn09129	0.985302		COMMON	fig|62977.3.peg.587	rxn09129	fig|62977.3.peg.587rxn09129	0.985302
COMMON	fig|62977.3.peg.587	rxn09160	fig|62977.3.peg.587rxn09160	0.985302		COMMON	fig|62977.3.peg.587	rxn09160	fig|62977.3.peg.587rxn09160	0.985302
COMMON	fig|62977.3.peg.587	rxn09161	fig|62977.3.peg.587rxn09161	0.985302		COMMON	fig|62977.3.peg.587	rxn09161	fig|62977.3.peg.587rxn09161	0.985302
COMMON	fig|62977.3.peg.587	rxn09162	fig|62977.3.peg.587rxn09162	0.985302		COMMON	fig|62977.3.peg.587	rxn09162	fig|62977.3.peg.587rxn09162	0.985302
COMMON	fig|62977.3.peg.587	rxn09163	fig|62977.3.peg.587rxn09163	0.985302		COMMON	fig|62977.3.peg.587	rxn09163	fig|62977.3.peg.587rxn09163	0.985302
COMMON	fig|62977.3.peg.587	rxn09123	fig|62977.3.peg.587rxn09123	0.985302		COMMON	fig|62977.3.peg.587	rxn09123	fig|62977.3.peg.587rxn09123	0.985302
COMMON	fig|62977.3.peg.587	rxn09124	fig|62977.3.peg.587rxn09124	0.985302		COMMON	fig|62977.3.peg.587	rxn09124	fig|62977.3.peg.587rxn09124	0.985302
COMMON	fig|62977.3.peg.587	rxn09125	fig|62977.3.peg.587rxn09125	0.985302		COMMON	fig|62977.3.peg.587	rxn09125	fig|62977.3.peg.587rxn09125	0.985302
COMMON	fig|62977.3.peg.587	rxn09126	fig|62977.3.peg.587rxn09126	0.985302		COMMON	fig|62977.3.peg.587	rxn09126	fig|62977.3.peg.587rxn09126	0.985302
COMMON	fig|62977.3.peg.587	rxn09127	fig|62977.3.peg.587rxn09127	0.985302		COMMON	fig|62977.3.peg.587	rxn09127	fig|62977.3.peg.587rxn09127	0.985302
COMMON	fig|62977.3.peg.587	rxn09164	fig|62977.3.peg.587rxn09164	0.985302		COMMON	fig|62977.3.peg.587	rxn09164	fig|62977.3.peg.587rxn09164	0.985302
COMMON	fig|62977.3.peg.587	rxn09159	fig|62977.3.peg.587rxn09159	0.985302		COMMON	fig|62977.3.peg.587	rxn09159	fig|62977.3.peg.587rxn09159	0.985302
COMMON	fig|62977.3.peg.587	rxn09158	fig|62977.3.peg.587rxn09158	0.985302		COMMON	fig|62977.3.peg.587	rxn09158	fig|62977.3.peg.587rxn09158	0.985302
COMMON	fig|62977.3.peg.587	rxn09155	fig|62977.3.peg.587rxn09155	0.985302		COMMON	fig|62977.3.peg.587	rxn09155	fig|62977.3.peg.587rxn09155	0.985302
COMMON	fig|62977.3.peg.587	rxn09154	fig|62977.3.peg.587rxn09154	0.985302		COMMON	fig|62977.3.peg.587	rxn09154	fig|62977.3.peg.587rxn09154	0.985302
COMMON	fig|62977.3.peg.587	rxn09157	fig|62977.3.peg.587rxn09157	0.985302		COMMON	fig|62977.3.peg.587	rxn09157	fig|62977.3.peg.587rxn09157	0.985302
COMMON	fig|62977.3.peg.587	rxn09151	fig|62977.3.peg.587rxn09151	0.985302		COMMON	fig|62977.3.peg.587	rxn09151	fig|62977.3.peg.587rxn09151	0.985302
COMMON	fig|62977.3.peg.587	rxn09150	fig|62977.3.peg.587rxn09150	0.985302		COMMON	fig|62977.3.peg.587	rxn09150	fig|62977.3.peg.587rxn09150	0.985302
COMMON	fig|62977.3.peg.587	rxn09153	fig|62977.3.peg.587rxn09153	0.985302		COMMON	fig|62977.3.peg.587	rxn09153	fig|62977.3.peg.587rxn09153	0.985302
COMMON	fig|62977.3.peg.587	rxn09152	fig|62977.3.peg.587rxn09152	0.985302		COMMON	fig|62977.3.peg.587	rxn09152	fig|62977.3.peg.587rxn09152	0.985302
COMMON	fig|62977.3.peg.587	rxn09139	fig|62977.3.peg.587rxn09139	0.985302		COMMON	fig|62977.3.peg.587	rxn09139	fig|62977.3.peg.587rxn09139	0.985302
COMMON	fig|62977.3.peg.587	rxn09138	fig|62977.3.peg.587rxn09138	0.985302		COMMON	fig|62977.3.peg.587	rxn09138	fig|62977.3.peg.587rxn09138	0.985302
COMMON	fig|62977.3.peg.587	rxn09133	fig|62977.3.peg.587rxn09133	0.985302		COMMON	fig|62977.3.peg.587	rxn09133	fig|62977.3.peg.587rxn09133	0.985302
COMMON	fig|62977.3.peg.587	rxn09132	fig|62977.3.peg.587rxn09132	0.985302		COMMON	fig|62977.3.peg.587	rxn09132	fig|62977.3.peg.587rxn09132	0.985302
COMMON	fig|62977.3.peg.587	rxn09131	fig|62977.3.peg.587rxn09131	0.985302		COMMON	fig|62977.3.peg.587	rxn09131	fig|62977.3.peg.587rxn09131	0.985302
COMMON	fig|62977.3.peg.587	rxn09130	fig|62977.3.peg.587rxn09130	0.985302		COMMON	fig|62977.3.peg.587	rxn09130	fig|62977.3.peg.587rxn09130	0.985302
COMMON	fig|62977.3.peg.587	rxn09137	fig|62977.3.peg.587rxn09137	0.985302		COMMON	fig|62977.3.peg.587	rxn09137	fig|62977.3.peg.587rxn09137	0.985302
COMMON	fig|62977.3.peg.587	rxn09136	fig|62977.3.peg.587rxn09136	0.985302		COMMON	fig|62977.3.peg.587	rxn09136	fig|62977.3.peg.587rxn09136	0.985302
COMMON	fig|62977.3.peg.587	rxn09135	fig|62977.3.peg.587rxn09135	0.985302		COMMON	fig|62977.3.peg.587	rxn09135	fig|62977.3.peg.587rxn09135	0.985302
COMMON	fig|62977.3.peg.587	rxn09134	fig|62977.3.peg.587rxn09134	0.985302		COMMON	fig|62977.3.peg.587	rxn09134	fig|62977.3.peg.587rxn09134	0.985302
COMMON	fig|62977.3.peg.587	rxn09148	fig|62977.3.peg.587rxn09148	0.985302		COMMON	fig|62977.3.peg.587	rxn09148	fig|62977.3.peg.587rxn09148	0.985302
COMMON	fig|62977.3.peg.587	rxn09142	fig|62977.3.peg.587rxn09142	0.985302		COMMON	fig|62977.3.peg.587	rxn09142	fig|62977.3.peg.587rxn09142	0.985302
COMMON	fig|62977.3.peg.587	rxn09143	fig|62977.3.peg.587rxn09143	0.985302		COMMON	fig|62977.3.peg.587	rxn09143	fig|62977.3.peg.587rxn09143	0.985302
COMMON	fig|62977.3.peg.587	rxn09140	fig|62977.3.peg.587rxn09140	0.985302		COMMON	fig|62977.3.peg.587	rxn09140	fig|62977.3.peg.587rxn09140	0.985302
COMMON	fig|62977.3.peg.587	rxn09141	fig|62977.3.peg.587rxn09141	0.985302		COMMON	fig|62977.3.peg.587	rxn09141	fig|62977.3.peg.587rxn09141	0.985302
COMMON	fig|62977.3.peg.587	rxn09146	fig|62977.3.peg.587rxn09146	0.985302		COMMON	fig|62977.3.peg.587	rxn09146	fig|62977.3.peg.587rxn09146	0.985302
COMMON	fig|62977.3.peg.587	rxn09144	fig|62977.3.peg.587rxn09144	0.985302		COMMON	fig|62977.3.peg.587	rxn09144	fig|62977.3.peg.587rxn09144	0.985302
COMMON	fig|62977.3.peg.3	rxn00211	fig|62977.3.peg.3rxn00211	0.893977		COMMON	fig|62977.3.peg.3	rxn00211	fig|62977.3.peg.3rxn00211	0.893977
COMMON	fig|62977.3.peg.683	rxn05381	fig|62977.3.peg.683rxn05381	0.718332		COMMON	fig|62977.3.peg.683	rxn05381	fig|62977.3.peg.683rxn05381	0.718332
COMMON	fig|62977.3.peg.683	rxn05390	fig|62977.3.peg.683rxn05390	0.718332		COMMON	fig|62977.3.peg.683	rxn05390	fig|62977.3.peg.683rxn05390	0.718332
COMMON	fig|62977.3.peg.683	rxn05402	fig|62977.3.peg.683rxn05402	0.718332		COMMON	fig|62977.3.peg.683	rxn05402	fig|62977.3.peg.683rxn05402	0.718332
COMMON	fig|62977.3.peg.683	rxn05386	fig|62977.3.peg.683rxn05386	0.718332		COMMON	fig|62977.3.peg.683	rxn05386	fig|62977.3.peg.683rxn05386	0.718332
COMMON	fig|62977.3.peg.683	rxn05394	fig|62977.3.peg.683rxn05394	0.718332		COMMON	fig|62977.3.peg.683	rxn05394	fig|62977.3.peg.683rxn05394	0.718332
COMMON	fig|62977.3.peg.683	rxn05377	fig|62977.3.peg.683rxn05377	0.718332		COMMON	fig|62977.3.peg.683	rxn05377	fig|62977.3.peg.683rxn05377	0.718332
COMMON	fig|62977.3.peg.683	rxn05398	fig|62977.3.peg.683rxn05398	0.718332		COMMON	fig|62977.3.peg.683	rxn05398	fig|62977.3.peg.683rxn05398	0.718332
COMMON	fig|62977.3.peg.683	rxn05332	fig|62977.3.peg.683rxn05332	0.718332		COMMON	fig|62977.3.peg.683	rxn05332	fig|62977.3.peg.683rxn05332	0.718332
COMMON	fig|62977.3.peg.683	rxn05373	fig|62977.3.peg.683rxn05373	0.718332		COMMON	fig|62977.3.peg.683	rxn05373	fig|62977.3.peg.683rxn05373	0.718332
COMMON	fig|62977.3.peg.683	rxn05365	fig|62977.3.peg.683rxn05365	0.718332		COMMON	fig|62977.3.peg.683	rxn05365	fig|62977.3.peg.683rxn05365	0.718332
COMMON	fig|62977.3.peg.683	rxn05331	fig|62977.3.peg.683rxn05331	0.718332		COMMON	fig|62977.3.peg.683	rxn05331	fig|62977.3.peg.683rxn05331	0.718332
COMMON	fig|62977.3.peg.683	rxn05462	fig|62977.3.peg.683rxn05462	0.718332		COMMON	fig|62977.3.peg.683	rxn05462	fig|62977.3.peg.683rxn05462	0.718332
COMMON	fig|62977.3.peg.683	rxn05333	fig|62977.3.peg.683rxn05333	0.718332		COMMON	fig|62977.3.peg.683	rxn05333	fig|62977.3.peg.683rxn05333	0.718332
COMMON	fig|62977.3.peg.683	rxn05369	fig|62977.3.peg.683rxn05369	0.718332		COMMON	fig|62977.3.peg.683	rxn05369	fig|62977.3.peg.683rxn05369	0.718332
COMMON	fig|62977.3.peg.683	rxn05335	fig|62977.3.peg.683rxn05335	0.718332		COMMON	fig|62977.3.peg.683	rxn05335	fig|62977.3.peg.683rxn05335	0.718332
COMMON	fig|62977.3.peg.683	rxn05334	fig|62977.3.peg.683rxn05334	0.718332		COMMON	fig|62977.3.peg.683	rxn05334	fig|62977.3.peg.683rxn05334	0.718332
COMMON	fig|62977.3.peg.683	rxn05329	fig|62977.3.peg.683rxn05329	0.718332		COMMON	fig|62977.3.peg.683	rxn05329	fig|62977.3.peg.683rxn05329	0.718332
COMMON	fig|62977.3.peg.683	rxn05330	fig|62977.3.peg.683rxn05330	0.718332		COMMON	fig|62977.3.peg.683	rxn05330	fig|62977.3.peg.683rxn05330	0.718332
COMMON	fig|62977.3.peg.683	rxn05406	fig|62977.3.peg.683rxn05406	0.718332		COMMON	fig|62977.3.peg.683	rxn05406	fig|62977.3.peg.683rxn05406	0.718332
COMMON	fig|62977.3.peg.683	rxn05361	fig|62977.3.peg.683rxn05361	0.718332		COMMON	fig|62977.3.peg.683	rxn05361	fig|62977.3.peg.683rxn05361	0.718332
COMMON	fig|62977.3.peg.2587	rxn00748	fig|62977.3.peg.2587rxn00748	0.421818		COMMON	fig|62977.3.peg.2587	rxn00748	fig|62977.3.peg.2587rxn00748	0.421818
COMMON	fig|62977.3.peg.868	rxn00656	fig|62977.3.peg.868rxn00656	0.119143		COMMON	fig|62977.3.peg.868	rxn00656	fig|62977.3.peg.868rxn00656	0.119143
COMMON	fig|62977.3.peg.1257	rxn00211	fig|62977.3.peg.1257rxn00211	0.924037		COMMON	fig|62977.3.peg.1257	rxn00211	fig|62977.3.peg.1257rxn00211	0.924037
COMMON	fig|62977.3.peg.2108	rxn00992	fig|62977.3.peg.2108rxn00992	0.919653		COMMON	fig|62977.3.peg.2108	rxn00992	fig|62977.3.peg.2108rxn00992	0.919653
COMMON	fig|62977.3.peg.2284	rxn05528	fig|62977.3.peg.2284rxn05528	0.919722		COMMON	fig|62977.3.peg.2284	rxn05528	fig|62977.3.peg.2284rxn05528	0.919722
COMMON	fig|62977.3.peg.2284	rxn05516	fig|62977.3.peg.2284rxn05516	0.870764		COMMON	fig|62977.3.peg.2284	rxn05516	fig|62977.3.peg.2284rxn05516	0.870764
COMMON	fig|62977.3.peg.1237	rxn03150	fig|62977.3.peg.1237rxn03150	0.239189		COMMON	fig|62977.3.peg.1237	rxn03150	fig|62977.3.peg.1237rxn03150	0.239189
COMMON	fig|62977.3.peg.894	rxn03906	fig|62977.3.peg.894rxn03906	0.721206		COMMON	fig|62977.3.peg.894	rxn03906	fig|62977.3.peg.894rxn03906	0.721206
COMMON	fig|62977.3.peg.993	rxn05515	fig|62977.3.peg.993rxn05515	0.727616		COMMON	fig|62977.3.peg.993	rxn05515	fig|62977.3.peg.993rxn05515	0.727616
COMMON	fig|62977.3.peg.993	rxn10147	fig|62977.3.peg.993rxn10147	0.727616		COMMON	fig|62977.3.peg.993	rxn10147	fig|62977.3.peg.993rxn10147	0.727616
COMMON	fig|62977.3.peg.1652	rxn02898	fig|62977.3.peg.1652rxn02898	0.189908		COMMON	fig|62977.3.peg.1652	rxn02898	fig|62977.3.peg.1652rxn02898	0.189908
COMMON	fig|62977.3.peg.3270	rxn02929	fig|62977.3.peg.3270rxn02929	0.403936		COMMON	fig|62977.3.peg.3270	rxn02929	fig|62977.3.peg.3270rxn02929	0.403936
COMMON	fig|62977.3.peg.350	rxn05549	fig|62977.3.peg.350rxn05549	0.334147		COMMON	fig|62977.3.peg.350	rxn05549	fig|62977.3.peg.350rxn05549	0.334147
COMMON	fig|62977.3.peg.3294	rxn01022	fig|62977.3.peg.3294rxn01022	0.433697		COMMON	fig|62977.3.peg.3294	rxn01022	fig|62977.3.peg.3294rxn01022	0.433697
COMMON	fig|62977.3.peg.604	rxn00119	fig|62977.3.peg.604rxn00119	0.967503		COMMON	fig|62977.3.peg.604	rxn00119	fig|62977.3.peg.604rxn00119	0.967503
COMMON	fig|62977.3.peg.181	rxn00917	fig|62977.3.peg.181rxn00917	0.889848		COMMON	fig|62977.3.peg.181	rxn00917	fig|62977.3.peg.181rxn00917	0.889848
COMMON	fig|62977.3.peg.280	rxn10147	fig|62977.3.peg.280rxn10147	0.449816		COMMON	fig|62977.3.peg.280	rxn10147	fig|62977.3.peg.280rxn10147	0.449816
COMMON	fig|71421.1.peg.988	rxn02321	fig|71421.1.peg.988rxn02321	0.0507293		COMMON	fig|71421.1.peg.988	rxn02321	fig|71421.1.peg.988rxn02321	0.0507293
COMMON	fig|71421.1.peg.891	rxn00693	fig|71421.1.peg.891rxn00693	0.0834904		COMMON	fig|71421.1.peg.891	rxn00693	fig|71421.1.peg.891rxn00693	0.0834904
COMMON	fig|71421.1.peg.300	rxn09310	fig|71421.1.peg.300rxn09310	0.00568729		COMMON	fig|71421.1.peg.300	rxn09310	fig|71421.1.peg.300rxn09310	0.00568729
COMMON	fig|71421.1.peg.639	rxn00623	fig|71421.1.peg.639rxn00623	0.0596717		COMMON	fig|71421.1.peg.639	rxn00623	fig|71421.1.peg.639rxn00623	0.0596717
COMMON	fig|71421.1.peg.354	rxn00938	fig|71421.1.peg.354rxn00938	0.0018992		COMMON	fig|71421.1.peg.354	rxn00938	fig|71421.1.peg.354rxn00938	0.0018992
COMMON	fig|71421.1.peg.916	rxn03087	fig|71421.1.peg.916rxn03087	0.00545155		COMMON	fig|71421.1.peg.916	rxn03087	fig|71421.1.peg.916rxn03087	0.00545155
COMMON	fig|71421.1.peg.916	rxn00467	fig|71421.1.peg.916rxn00467	0.00545155		COMMON	fig|71421.1.peg.916	rxn00467	fig|71421.1.peg.916rxn00467	0.00545155
COMMON	fig|71421.1.peg.1116	rxn00333	fig|71421.1.peg.1116rxn00333	0.247656		COMMON	fig|71421.1.peg.1116	rxn00333	fig|71421.1.peg.1116rxn00333	0.247656
COMMON	fig|71421.1.peg.1115	rxn00693	fig|71421.1.peg.1115rxn00693	0.0979086		COMMON	fig|71421.1.peg.1115	rxn00693	fig|71421.1.peg.1115rxn00693	0.0979086
COMMON	fig|71421.1.peg.265	rxn11703	fig|71421.1.peg.265rxn11703	0.952005		COMMON	fig|71421.1.peg.265	rxn11703	fig|71421.1.peg.265rxn11703	0.952005
COMMON	fig|71421.1.peg.1404	rxn05117	fig|71421.1.peg.1404rxn05117	0.00110339		COMMON	fig|71421.1.peg.1404	rxn05117	fig|71421.1.peg.1404rxn05117	0.00110339
COMMON	fig|71421.1.peg.1404	rxn02402	fig|71421.1.peg.1404rxn02402	0.180375		COMMON	fig|71421.1.peg.1404	rxn02402	fig|71421.1.peg.1404rxn02402	0.180375
COMMON	fig|71421.1.peg.240	rxn01644	fig|71421.1.peg.240rxn01644	0.00821971		COMMON	fig|71421.1.peg.240	rxn01644	fig|71421.1.peg.240rxn01644	0.00821971
COMMON	fig|71421.1.peg.240	rxn02988	fig|71421.1.peg.240rxn02988	0.0655803		COMMON	fig|71421.1.peg.240	rxn02988	fig|71421.1.peg.240rxn02988	0.0655803
COMMON	fig|71421.1.peg.1466	rxn01675	fig|71421.1.peg.1466rxn01675	0.00217475		COMMON	fig|71421.1.peg.1466	rxn01675	fig|71421.1.peg.1466rxn01675	0.00217475
COMMON	fig|71421.1.peg.1466	rxn00641	fig|71421.1.peg.1466rxn00641	0.000974898		COMMON	fig|71421.1.peg.1466	rxn00641	fig|71421.1.peg.1466rxn00641	0.000974898
COMMON	fig|71421.1.peg.1464	rxn00751	fig|71421.1.peg.1464rxn00751	0.887433		COMMON	fig|71421.1.peg.1464	rxn00751	fig|71421.1.peg.1464rxn00751	0.887433
COMMON	fig|71421.1.peg.207	rxn05466	fig|71421.1.peg.207rxn05466	0.0372765		COMMON	fig|71421.1.peg.207	rxn05466	fig|71421.1.peg.207rxn05466	0.0372765
COMMON	fig|71421.1.peg.268	rxn03086	fig|71421.1.peg.268rxn03086	0.000271051		COMMON	fig|71421.1.peg.268	rxn03086	fig|71421.1.peg.268rxn03086	0.000271051
COMMON	fig|71421.1.peg.1362	rxn05416	fig|71421.1.peg.1362rxn05416	0.00468685		COMMON	fig|71421.1.peg.1362	rxn05416	fig|71421.1.peg.1362rxn05416	0.00468685
COMMON	fig|71421.1.peg.1362	rxn05412	fig|71421.1.peg.1362rxn05412	0.00468685		COMMON	fig|71421.1.peg.1362	rxn05412	fig|71421.1.peg.1362rxn05412	0.00468685
COMMON	fig|71421.1.peg.1362	rxn05428	fig|71421.1.peg.1362rxn05428	0.00468685		COMMON	fig|71421.1.peg.1362	rxn05428	fig|71421.1.peg.1362rxn05428	0.00468685
COMMON	fig|71421.1.peg.1362	rxn01453	fig|71421.1.peg.1362rxn01453	0.142069		COMMON	fig|71421.1.peg.1362	rxn01453	fig|71421.1.peg.1362rxn01453	0.142069
COMMON	fig|71421.1.peg.1362	rxn05432	fig|71421.1.peg.1362rxn05432	0.00468685		COMMON	fig|71421.1.peg.1362	rxn05432	fig|71421.1.peg.1362rxn05432	0.00468685
COMMON	fig|71421.1.peg.1362	rxn05424	fig|71421.1.peg.1362rxn05424	0.00468685		COMMON	fig|71421.1.peg.1362	rxn05424	fig|71421.1.peg.1362rxn05424	0.00468685
COMMON	fig|71421.1.peg.1362	rxn05420	fig|71421.1.peg.1362rxn05420	0.00468685		COMMON	fig|71421.1.peg.1362	rxn05420	fig|71421.1.peg.1362rxn05420	0.00468685
COMMON	fig|71421.1.peg.572	rxn02264	fig|71421.1.peg.572rxn02264	0.00691191		COMMON	fig|71421.1.peg.572	rxn02264	fig|71421.1.peg.572rxn02264	0.00691191
COMMON	fig|71421.1.peg.1263	rxn05331	fig|71421.1.peg.1263rxn05331	0.698304		COMMON	fig|71421.1.peg.1263	rxn05331	fig|71421.1.peg.1263rxn05331	0.698304
COMMON	fig|71421.1.peg.1263	rxn05330	fig|71421.1.peg.1263rxn05330	0.698304		COMMON	fig|71421.1.peg.1263	rxn05330	fig|71421.1.peg.1263rxn05330	0.698304
COMMON	fig|71421.1.peg.1263	rxn05333	fig|71421.1.peg.1263rxn05333	0.698304		COMMON	fig|71421.1.peg.1263	rxn05333	fig|71421.1.peg.1263rxn05333	0.698304
COMMON	fig|71421.1.peg.1263	rxn05332	fig|71421.1.peg.1263rxn05332	0.698304		COMMON	fig|71421.1.peg.1263	rxn05332	fig|71421.1.peg.1263rxn05332	0.698304
COMMON	fig|71421.1.peg.1263	rxn05335	fig|71421.1.peg.1263rxn05335	0.698304		COMMON	fig|71421.1.peg.1263	rxn05335	fig|71421.1.peg.1263rxn05335	0.698304
COMMON	fig|71421.1.peg.1263	rxn05334	fig|71421.1.peg.1263rxn05334	0.698304		COMMON	fig|71421.1.peg.1263	rxn05334	fig|71421.1.peg.1263rxn05334	0.698304
COMMON	fig|71421.1.peg.1263	rxn05329	fig|71421.1.peg.1263rxn05329	0.698304		COMMON	fig|71421.1.peg.1263	rxn05329	fig|71421.1.peg.1263rxn05329	0.698304
COMMON	fig|71421.1.peg.52	rxn03856	fig|71421.1.peg.52rxn03856	0.0987771		COMMON	fig|71421.1.peg.52	rxn03856	fig|71421.1.peg.52rxn03856	0.0987771
COMMON	fig|71421.1.peg.52	rxn00763	fig|71421.1.peg.52rxn00763	0.0772169		COMMON	fig|71421.1.peg.52	rxn00763	fig|71421.1.peg.52rxn00763	0.0772169
COMMON	fig|71421.1.peg.665	rxn02449	fig|71421.1.peg.665rxn02449	0.142595		COMMON	fig|71421.1.peg.665	rxn02449	fig|71421.1.peg.665rxn02449	0.142595
COMMON	fig|71421.1.peg.171	rxn01169	fig|71421.1.peg.171rxn01169	0.374925		COMMON	fig|71421.1.peg.171	rxn01169	fig|71421.1.peg.171rxn01169	0.374925
COMMON	fig|71421.1.peg.171	rxn00216	fig|71421.1.peg.171rxn00216	0.374925		COMMON	fig|71421.1.peg.171	rxn00216	fig|71421.1.peg.171rxn00216	0.374925
COMMON	fig|71421.1.peg.989	rxn01275	fig|71421.1.peg.989rxn01275	0.111972		COMMON	fig|71421.1.peg.989	rxn01275	fig|71421.1.peg.989rxn01275	0.111972
COMMON	fig|71421.1.peg.81	rxn10010	fig|71421.1.peg.81rxn10010	0.245283		COMMON	fig|71421.1.peg.81	rxn10010	fig|71421.1.peg.81rxn10010	0.245283
COMMON	fig|71421.1.peg.81	rxn10011	fig|71421.1.peg.81rxn10011	0.245283		COMMON	fig|71421.1.peg.81	rxn10011	fig|71421.1.peg.81rxn10011	0.245283
COMMON	fig|71421.1.peg.1483	rxn01013	fig|71421.1.peg.1483rxn01013	0.492702		COMMON	fig|71421.1.peg.1483	rxn01013	fig|71421.1.peg.1483rxn01013	0.492702
COMMON	fig|71421.1.peg.1383	rxn09310	fig|71421.1.peg.1383rxn09310	0.374875		COMMON	fig|71421.1.peg.1383	rxn09310	fig|71421.1.peg.1383rxn09310	0.374875
COMMON	fig|71421.1.peg.1380	rxn00605	fig|71421.1.peg.1380rxn00605	0.0208377		COMMON	fig|71421.1.peg.1380	rxn00605	fig|71421.1.peg.1380rxn00605	0.0208377
COMMON	fig|71421.1.peg.820	rxn01286	fig|71421.1.peg.820rxn01286	0.00170449		COMMON	fig|71421.1.peg.820	rxn01286	fig|71421.1.peg.820rxn01286	0.00170449
COMMON	fig|71421.1.peg.820	rxn00506	fig|71421.1.peg.820rxn00506	0.00170449		COMMON	fig|71421.1.peg.820	rxn00506	fig|71421.1.peg.820rxn00506	0.00170449
COMMON	fig|71421.1.peg.33	rxn02155	fig|71421.1.peg.33rxn02155	0.0265933		COMMON	fig|71421.1.peg.33	rxn02155	fig|71421.1.peg.33rxn02155	0.0265933
COMMON	fig|71421.1.peg.869	rxn02056	fig|71421.1.peg.869rxn02056	0.262065		COMMON	fig|71421.1.peg.869	rxn02056	fig|71421.1.peg.869rxn02056	0.262065
COMMON	fig|71421.1.peg.1021	rxn05381	fig|71421.1.peg.1021rxn05381	0.753499		COMMON	fig|71421.1.peg.1021	rxn05381	fig|71421.1.peg.1021rxn05381	0.753499
COMMON	fig|71421.1.peg.1021	rxn05390	fig|71421.1.peg.1021rxn05390	0.753499		COMMON	fig|71421.1.peg.1021	rxn05390	fig|71421.1.peg.1021rxn05390	0.753499
COMMON	fig|71421.1.peg.1021	rxn05402	fig|71421.1.peg.1021rxn05402	0.753499		COMMON	fig|71421.1.peg.1021	rxn05402	fig|71421.1.peg.1021rxn05402	0.753499
COMMON	fig|71421.1.peg.1021	rxn05386	fig|71421.1.peg.1021rxn05386	0.753499		COMMON	fig|71421.1.peg.1021	rxn05386	fig|71421.1.peg.1021rxn05386	0.753499
COMMON	fig|71421.1.peg.1021	rxn05394	fig|71421.1.peg.1021rxn05394	0.753499		COMMON	fig|71421.1.peg.1021	rxn05394	fig|71421.1.peg.1021rxn05394	0.753499
COMMON	fig|71421.1.peg.1021	rxn05377	fig|71421.1.peg.1021rxn05377	0.753499		COMMON	fig|71421.1.peg.1021	rxn05377	fig|71421.1.peg.1021rxn05377	0.753499
COMMON	fig|71421.1.peg.1021	rxn05398	fig|71421.1.peg.1021rxn05398	0.753499		COMMON	fig|71421.1.peg.1021	rxn05398	fig|71421.1.peg.1021rxn05398	0.753499
COMMON	fig|71421.1.peg.1021	rxn05332	fig|71421.1.peg.1021rxn05332	0.753499		COMMON	fig|71421.1.peg.1021	rxn05332	fig|71421.1.peg.1021rxn05332	0.753499
COMMON	fig|71421.1.peg.1021	rxn05373	fig|71421.1.peg.1021rxn05373	0.753499		COMMON	fig|71421.1.peg.1021	rxn05373	fig|71421.1.peg.1021rxn05373	0.753499
COMMON	fig|71421.1.peg.1021	rxn05365	fig|71421.1.peg.1021rxn05365	0.753499		COMMON	fig|71421.1.peg.1021	rxn05365	fig|71421.1.peg.1021rxn05365	0.753499
COMMON	fig|71421.1.peg.1021	rxn05331	fig|71421.1.peg.1021rxn05331	0.753499		COMMON	fig|71421.1.peg.1021	rxn05331	fig|71421.1.peg.1021rxn05331	0.753499
COMMON	fig|71421.1.peg.1021	rxn05462	fig|71421.1.peg.1021rxn05462	0.753499		COMMON	fig|71421.1.peg.1021	rxn05462	fig|71421.1.peg.1021rxn05462	0.753499
COMMON	fig|71421.1.peg.1021	rxn05333	fig|71421.1.peg.1021rxn05333	0.753499		COMMON	fig|71421.1.peg.1021	rxn05333	fig|71421.1.peg.1021rxn05333	0.753499
COMMON	fig|71421.1.peg.1021	rxn05369	fig|71421.1.peg.1021rxn05369	0.753499		COMMON	fig|71421.1.peg.1021	rxn05369	fig|71421.1.peg.1021rxn05369	0.753499
COMMON	fig|71421.1.peg.1021	rxn05335	fig|71421.1.peg.1021rxn05335	0.753499		COMMON	fig|71421.1.peg.1021	rxn05335	fig|71421.1.peg.1021rxn05335	0.753499
COMMON	fig|71421.1.peg.1021	rxn05334	fig|71421.1.peg.1021rxn05334	0.753499		COMMON	fig|71421.1.peg.1021	rxn05334	fig|71421.1.peg.1021rxn05334	0.753499
COMMON	fig|71421.1.peg.1021	rxn05329	fig|71421.1.peg.1021rxn05329	0.753499		COMMON	fig|71421.1.peg.1021	rxn05329	fig|71421.1.peg.1021rxn05329	0.753499
COMMON	fig|71421.1.peg.1021	rxn05330	fig|71421.1.peg.1021rxn05330	0.753499		COMMON	fig|71421.1.peg.1021	rxn05330	fig|71421.1.peg.1021rxn05330	0.753499
COMMON	fig|71421.1.peg.1021	rxn05406	fig|71421.1.peg.1021rxn05406	0.753499		COMMON	fig|71421.1.peg.1021	rxn05406	fig|71421.1.peg.1021rxn05406	0.753499
COMMON	fig|71421.1.peg.1021	rxn05361	fig|71421.1.peg.1021rxn05361	0.753499		COMMON	fig|71421.1.peg.1021	rxn05361	fig|71421.1.peg.1021rxn05361	0.753499
COMMON	fig|71421.1.peg.1623	rxn00559	fig|71421.1.peg.1623rxn00559	0.436025		COMMON	fig|71421.1.peg.1623	rxn00559	fig|71421.1.peg.1623rxn00559	0.436025
COMMON	fig|71421.1.peg.1024	rxn00119	fig|71421.1.peg.1024rxn00119	0.959115		COMMON	fig|71421.1.peg.1024	rxn00119	fig|71421.1.peg.1024rxn00119	0.959115
COMMON	fig|71421.1.peg.480	rxn08333	fig|71421.1.peg.480rxn08333	0.627253		COMMON	fig|71421.1.peg.480	rxn08333	fig|71421.1.peg.480rxn08333	0.627253
COMMON	fig|71421.1.peg.352	rxn09310	fig|71421.1.peg.352rxn09310	0.0922044		COMMON	fig|71421.1.peg.352	rxn09310	fig|71421.1.peg.352rxn09310	0.0922044
COMMON	fig|71421.1.peg.1246	rxn02929	fig|71421.1.peg.1246rxn02929	0.416667		COMMON	fig|71421.1.peg.1246	rxn02929	fig|71421.1.peg.1246rxn02929	0.416667
COMMON	fig|71421.1.peg.555	rxn01972	fig|71421.1.peg.555rxn01972	0.646986		COMMON	fig|71421.1.peg.555	rxn01972	fig|71421.1.peg.555rxn01972	0.646986
COMMON	fig|71421.1.peg.333	rxn01537	fig|71421.1.peg.333rxn01537	0.275551		COMMON	fig|71421.1.peg.333	rxn01537	fig|71421.1.peg.333rxn01537	0.275551
COMMON	fig|71421.1.peg.330	rxn05159	fig|71421.1.peg.330rxn05159	0.00266563		COMMON	fig|71421.1.peg.330	rxn05159	fig|71421.1.peg.330rxn05159	0.00266563
COMMON	fig|83332.1.peg.3728	rxn01618	fig|83332.1.peg.3728rxn01618	0.0150656		COMMON	fig|83332.1.peg.3728	rxn01618	fig|83332.1.peg.3728rxn01618	0.0150656
COMMON	fig|83332.1.peg.2074	rxn03491	fig|83332.1.peg.2074rxn03491	0.978685		COMMON	fig|83332.1.peg.2074	rxn03491	fig|83332.1.peg.2074rxn03491	0.978685
COMMON	fig|83332.1.peg.2238	rxn04384	fig|83332.1.peg.2238rxn04384	0.722705		COMMON	fig|83332.1.peg.2238	rxn04384	fig|83332.1.peg.2238rxn04384	0.722705
COMMON	fig|83332.1.peg.2210	rxn03538	fig|83332.1.peg.2210rxn03538	0.898781		COMMON	fig|83332.1.peg.2210	rxn03538	fig|83332.1.peg.2210rxn03538	0.898781
COMMON	fig|83332.1.peg.859	rxn03086	fig|83332.1.peg.859rxn03086	0.0583563		COMMON	fig|83332.1.peg.859	rxn03086	fig|83332.1.peg.859rxn03086	0.0583563
COMMON	fig|83332.1.peg.859	rxn00260	fig|83332.1.peg.859rxn00260	0.610897		COMMON	fig|83332.1.peg.859	rxn00260	fig|83332.1.peg.859rxn00260	0.610897
COMMON	fig|83332.1.peg.2254	rxn00748	fig|83332.1.peg.2254rxn00748	0.626578		COMMON	fig|83332.1.peg.2254	rxn00748	fig|83332.1.peg.2254rxn00748	0.626578
COMMON	fig|83332.1.peg.1407	rxn03397	fig|83332.1.peg.1407rxn03397	0.724945		COMMON	fig|83332.1.peg.1407	rxn03397	fig|83332.1.peg.1407rxn03397	0.724945
COMMON	fig|83332.1.peg.1407	rxn10094	fig|83332.1.peg.1407rxn10094	0.724945		COMMON	fig|83332.1.peg.1407	rxn10094	fig|83332.1.peg.1407rxn10094	0.724945
COMMON	fig|83332.1.peg.1405	rxn03397	fig|83332.1.peg.1405rxn03397	0.650746		COMMON	fig|83332.1.peg.1405	rxn03397	fig|83332.1.peg.1405rxn03397	0.650746
COMMON	fig|83332.1.peg.1405	rxn10094	fig|83332.1.peg.1405rxn10094	0.650746		COMMON	fig|83332.1.peg.1405	rxn10094	fig|83332.1.peg.1405rxn10094	0.650746
COMMON	fig|83332.1.peg.2850	rxn06979	fig|83332.1.peg.2850rxn06979	0.985823		COMMON	fig|83332.1.peg.2850	rxn06979	fig|83332.1.peg.2850rxn06979	0.985823
COMMON	fig|83332.1.peg.2850	rxn11544	fig|83332.1.peg.2850rxn11544	0.985823		COMMON	fig|83332.1.peg.2850	rxn11544	fig|83332.1.peg.2850rxn11544	0.985823
COMMON	fig|83332.1.peg.2133	rxn00137	fig|83332.1.peg.2133rxn00137	0.541799		COMMON	fig|83332.1.peg.2133	rxn00137	fig|83332.1.peg.2133rxn00137	0.541799
COMMON	fig|83332.1.peg.2775	rxn02929	fig|83332.1.peg.2775rxn02929	0.218491		COMMON	fig|83332.1.peg.2775	rxn02929	fig|83332.1.peg.2775rxn02929	0.218491
COMMON	fig|83332.1.peg.1220	rxn05549	fig|83332.1.peg.1220rxn05549	0.0020527		COMMON	fig|83332.1.peg.1220	rxn05549	fig|83332.1.peg.1220rxn05549	0.0020527
COMMON	fig|83332.1.peg.3267	rxn00641	fig|83332.1.peg.3267rxn00641	0.418318		COMMON	fig|83332.1.peg.3267	rxn00641	fig|83332.1.peg.3267rxn00641	0.418318
COMMON	fig|83332.1.peg.2755	rxn01644	fig|83332.1.peg.2755rxn01644	0.0152404		COMMON	fig|83332.1.peg.2755	rxn01644	fig|83332.1.peg.2755rxn01644	0.0152404
COMMON	fig|83332.1.peg.2755	rxn01635	fig|83332.1.peg.2755rxn01635	0.395035		COMMON	fig|83332.1.peg.2755	rxn01635	fig|83332.1.peg.2755rxn01635	0.395035
COMMON	fig|83332.1.peg.2143	rxn00469	fig|83332.1.peg.2143rxn00469	0.670788		COMMON	fig|83332.1.peg.2143	rxn00469	fig|83332.1.peg.2143rxn00469	0.670788
COMMON	fig|83332.1.peg.3220	rxn00748	fig|83332.1.peg.3220rxn00748	0.587014		COMMON	fig|83332.1.peg.3220	rxn00748	fig|83332.1.peg.3220rxn00748	0.587014
COMMON	fig|83332.1.peg.795	rxn09953	fig|83332.1.peg.795rxn09953	0.0231414		COMMON	fig|83332.1.peg.795	rxn09953	fig|83332.1.peg.795rxn09953	0.0231414
COMMON	fig|83332.1.peg.3226	rxn05416	fig|83332.1.peg.3226rxn05416	0.150155		COMMON	fig|83332.1.peg.3226	rxn05416	fig|83332.1.peg.3226rxn05416	0.150155
COMMON	fig|83332.1.peg.3226	rxn05412	fig|83332.1.peg.3226rxn05412	0.150155		COMMON	fig|83332.1.peg.3226	rxn05412	fig|83332.1.peg.3226rxn05412	0.150155
COMMON	fig|83332.1.peg.3226	rxn05357	fig|83332.1.peg.3226rxn05357	0.150155		COMMON	fig|83332.1.peg.3226	rxn05357	fig|83332.1.peg.3226rxn05357	0.150155
COMMON	fig|83332.1.peg.3226	rxn05356	fig|83332.1.peg.3226rxn05356	0.150155		COMMON	fig|83332.1.peg.3226	rxn05356	fig|83332.1.peg.3226rxn05356	0.150155
COMMON	fig|83332.1.peg.3226	rxn05353	fig|83332.1.peg.3226rxn05353	0.150155		COMMON	fig|83332.1.peg.3226	rxn05353	fig|83332.1.peg.3226rxn05353	0.150155
COMMON	fig|83332.1.peg.3226	rxn05428	fig|83332.1.peg.3226rxn05428	0.150155		COMMON	fig|83332.1.peg.3226	rxn05428	fig|83332.1.peg.3226rxn05428	0.150155
COMMON	fig|83332.1.peg.3226	rxn05432	fig|83332.1.peg.3226rxn05432	0.150155		COMMON	fig|83332.1.peg.3226	rxn05432	fig|83332.1.peg.3226rxn05432	0.150155
COMMON	fig|83332.1.peg.3226	rxn05424	fig|83332.1.peg.3226rxn05424	0.150155		COMMON	fig|83332.1.peg.3226	rxn05424	fig|83332.1.peg.3226rxn05424	0.150155
COMMON	fig|83332.1.peg.3226	rxn05420	fig|83332.1.peg.3226rxn05420	0.150155		COMMON	fig|83332.1.peg.3226	rxn05420	fig|83332.1.peg.3226rxn05420	0.150155
COMMON	fig|83332.1.peg.3226	rxn05352	fig|83332.1.peg.3226rxn05352	0.150155		COMMON	fig|83332.1.peg.3226	rxn05352	fig|83332.1.peg.3226rxn05352	0.150155
COMMON	fig|83332.1.peg.2943	rxn10191	fig|83332.1.peg.2943rxn10191	0.00131303		COMMON	fig|83332.1.peg.2943	rxn10191	fig|83332.1.peg.2943rxn10191	0.00131303
COMMON	fig|83332.1.peg.1507	rxn03030	fig|83332.1.peg.1507rxn03030	0.0331208		COMMON	fig|83332.1.peg.1507	rxn03030	fig|83332.1.peg.1507rxn03030	0.0331208
COMMON	fig|83332.1.peg.650	rxn01169	fig|83332.1.peg.650rxn01169	0.682693		COMMON	fig|83332.1.peg.650	rxn01169	fig|83332.1.peg.650rxn01169	0.682693
COMMON	fig|83332.1.peg.650	rxn00216	fig|83332.1.peg.650rxn00216	0.682693		COMMON	fig|83332.1.peg.650	rxn00216	fig|83332.1.peg.650rxn00216	0.682693
COMMON	fig|83332.1.peg.2005	rxn03397	fig|83332.1.peg.2005rxn03397	0.590473		COMMON	fig|83332.1.peg.2005	rxn03397	fig|83332.1.peg.2005rxn03397	0.590473
COMMON	fig|83332.1.peg.2005	rxn10094	fig|83332.1.peg.2005rxn10094	0.590473		COMMON	fig|83332.1.peg.2005	rxn10094	fig|83332.1.peg.2005rxn10094	0.590473
COMMON	fig|83332.1.peg.2072	rxn03492	fig|83332.1.peg.2072rxn03492	0.975576		COMMON	fig|83332.1.peg.2072	rxn03492	fig|83332.1.peg.2072rxn03492	0.975576
COMMON	fig|83332.1.peg.2072	rxn04050	fig|83332.1.peg.2072rxn04050	0.975576		COMMON	fig|83332.1.peg.2072	rxn04050	fig|83332.1.peg.2072rxn04050	0.975576
COMMON	fig|83332.1.peg.554	rxn11703	fig|83332.1.peg.554rxn11703	0.69022		COMMON	fig|83332.1.peg.554	rxn11703	fig|83332.1.peg.554rxn11703	0.69022
COMMON	fig|83332.1.peg.557	rxn08299	fig|83332.1.peg.557rxn08299	0.00422631		COMMON	fig|83332.1.peg.557	rxn08299	fig|83332.1.peg.557rxn08299	0.00422631
COMMON	fig|83332.1.peg.557	rxn10253	fig|83332.1.peg.557rxn10253	0.00422631		COMMON	fig|83332.1.peg.557	rxn10253	fig|83332.1.peg.557rxn10253	0.00422631
COMMON	fig|83332.1.peg.557	rxn10254	fig|83332.1.peg.557rxn10254	0.00422631		COMMON	fig|83332.1.peg.557	rxn10254	fig|83332.1.peg.557rxn10254	0.00422631
COMMON	fig|83332.1.peg.558	rxn03397	fig|83332.1.peg.558rxn03397	0.69777		COMMON	fig|83332.1.peg.558	rxn03397	fig|83332.1.peg.558rxn03397	0.69777
COMMON	fig|83332.1.peg.558	rxn10094	fig|83332.1.peg.558rxn10094	0.69777		COMMON	fig|83332.1.peg.558	rxn10094	fig|83332.1.peg.558rxn10094	0.69777
COMMON	fig|83332.1.peg.89	rxn11946	fig|83332.1.peg.89rxn11946	0.098018		COMMON	fig|83332.1.peg.89	rxn11946	fig|83332.1.peg.89rxn11946	0.098018
COMMON	fig|83332.1.peg.89	rxn03395	fig|83332.1.peg.89rxn03395	0.098018		COMMON	fig|83332.1.peg.89	rxn03395	fig|83332.1.peg.89rxn03395	0.098018
COMMON	fig|83332.1.peg.2639	rxn03167	fig|83332.1.peg.2639rxn03167	0.00198616		COMMON	fig|83332.1.peg.2639	rxn03167	fig|83332.1.peg.2639rxn03167	0.00198616
COMMON	fig|83332.1.peg.3199	rxn03394	fig|83332.1.peg.3199rxn03394	0.957066		COMMON	fig|83332.1.peg.3199	rxn03394	fig|83332.1.peg.3199rxn03394	0.957066
COMMON	fig|83332.1.peg.255	rxn03540	fig|83332.1.peg.255rxn03540	0.770354		COMMON	fig|83332.1.peg.255	rxn03540	fig|83332.1.peg.255rxn03540	0.770354
COMMON	fig|83332.1.peg.3810	rxn09106	fig|83332.1.peg.3810rxn09106	0.639278		COMMON	fig|83332.1.peg.3810	rxn09106	fig|83332.1.peg.3810rxn09106	0.639278
COMMON	fig|83332.1.peg.3810	rxn09107	fig|83332.1.peg.3810rxn09107	0.639278		COMMON	fig|83332.1.peg.3810	rxn09107	fig|83332.1.peg.3810rxn09107	0.639278
COMMON	fig|83332.1.peg.3810	rxn09104	fig|83332.1.peg.3810rxn09104	0.639278		COMMON	fig|83332.1.peg.3810	rxn09104	fig|83332.1.peg.3810rxn09104	0.639278
COMMON	fig|83332.1.peg.3810	rxn09105	fig|83332.1.peg.3810rxn09105	0.639278		COMMON	fig|83332.1.peg.3810	rxn09105	fig|83332.1.peg.3810rxn09105	0.639278
COMMON	fig|83332.1.peg.3810	rxn09102	fig|83332.1.peg.3810rxn09102	0.639278		COMMON	fig|83332.1.peg.3810	rxn09102	fig|83332.1.peg.3810rxn09102	0.639278
COMMON	fig|83332.1.peg.3810	rxn09103	fig|83332.1.peg.3810rxn09103	0.639278		COMMON	fig|83332.1.peg.3810	rxn09103	fig|83332.1.peg.3810rxn09103	0.639278
COMMON	fig|83332.1.peg.3810	rxn09101	fig|83332.1.peg.3810rxn09101	0.639278		COMMON	fig|83332.1.peg.3810	rxn09101	fig|83332.1.peg.3810rxn09101	0.639278
COMMON	fig|83332.1.peg.3810	rxn10265	fig|83332.1.peg.3810rxn10265	0.639278		COMMON	fig|83332.1.peg.3810	rxn10265	fig|83332.1.peg.3810rxn10265	0.639278
COMMON	fig|83332.1.peg.3810	rxn10266	fig|83332.1.peg.3810rxn10266	0.639278		COMMON	fig|83332.1.peg.3810	rxn10266	fig|83332.1.peg.3810rxn10266	0.639278
COMMON	fig|83332.1.peg.844	rxn09953	fig|83332.1.peg.844rxn09953	0.514795		COMMON	fig|83332.1.peg.844	rxn09953	fig|83332.1.peg.844rxn09953	0.514795
COMMON	fig|83332.1.peg.2363	rxn09345	fig|83332.1.peg.2363rxn09345	0.48617		COMMON	fig|83332.1.peg.2363	rxn09345	fig|83332.1.peg.2363rxn09345	0.48617
COMMON	fig|83332.1.peg.729	rxn01763	fig|83332.1.peg.729rxn01763	0.00327377		COMMON	fig|83332.1.peg.729	rxn01763	fig|83332.1.peg.729rxn01763	0.00327377
COMMON	fig|83332.1.peg.3474	rxn01025	fig|83332.1.peg.3474rxn01025	0.223646		COMMON	fig|83332.1.peg.3474	rxn01025	fig|83332.1.peg.3474rxn01025	0.223646
COMMON	fig|83332.1.peg.2885	rxn00119	fig|83332.1.peg.2885rxn00119	0.987011		COMMON	fig|83332.1.peg.2885	rxn00119	fig|83332.1.peg.2885rxn00119	0.987011
COMMON	fig|83332.1.peg.3308	rxn01972	fig|83332.1.peg.3308rxn01972	0.81836		COMMON	fig|83332.1.peg.3308	rxn01972	fig|83332.1.peg.3308rxn01972	0.81836
COMMON	fig|83332.1.peg.3056	rxn03974	fig|83332.1.peg.3056rxn03974	0.0933566		COMMON	fig|83332.1.peg.3056	rxn03974	fig|83332.1.peg.3056rxn03974	0.0933566
COMMON	fig|83332.1.peg.399	rxn10319	fig|83332.1.peg.399rxn10319	0.000395903		COMMON	fig|83332.1.peg.399	rxn10319	fig|83332.1.peg.399rxn10319	0.000395903
COMMON	fig|83332.1.peg.399	rxn10318	fig|83332.1.peg.399rxn10318	0.000395903		COMMON	fig|83332.1.peg.399	rxn10318	fig|83332.1.peg.399rxn10318	0.000395903
COMMON	fig|83332.1.peg.399	rxn10320	fig|83332.1.peg.399rxn10320	0.000395903		COMMON	fig|83332.1.peg.399	rxn10320	fig|83332.1.peg.399rxn10320	0.000395903
COMMON	fig|83332.1.peg.399	rxn10191	fig|83332.1.peg.399rxn10191	0.000395903		COMMON	fig|83332.1.peg.399	rxn10191	fig|83332.1.peg.399rxn10191	0.000395903
COMMON	fig|83332.1.peg.1753	rxn04139	fig|83332.1.peg.1753rxn04139	0.29922		COMMON	fig|83332.1.peg.1753	rxn04139	fig|83332.1.peg.1753rxn04139	0.29922
COMMON	fig|83332.1.peg.1753	rxn12224	fig|83332.1.peg.1753rxn12224	0.380863		COMMON	fig|83332.1.peg.1753	rxn12224	fig|83332.1.peg.1753rxn12224	0.380863
COMMON	fig|83332.1.peg.2959	rxn10197	fig|83332.1.peg.2959rxn10197	0.00726167		COMMON	fig|83332.1.peg.2959	rxn10197	fig|83332.1.peg.2959rxn10197	0.00726167
COMMON	fig|83332.1.peg.2959	rxn10293	fig|83332.1.peg.2959rxn10293	0.0151216		COMMON	fig|83332.1.peg.2959	rxn10293	fig|83332.1.peg.2959rxn10293	0.0151216
COMMON	fig|83332.1.peg.2959	rxn10192	fig|83332.1.peg.2959rxn10192	0.0151216		COMMON	fig|83332.1.peg.2959	rxn10192	fig|83332.1.peg.2959rxn10192	0.0151216
COMMON	fig|83332.1.peg.2959	rxn10292	fig|83332.1.peg.2959rxn10292	0.0151216		COMMON	fig|83332.1.peg.2959	rxn10292	fig|83332.1.peg.2959rxn10292	0.0151216
COMMON	fig|83332.1.peg.2959	rxn10291	fig|83332.1.peg.2959rxn10291	0.0151216		COMMON	fig|83332.1.peg.2959	rxn10291	fig|83332.1.peg.2959rxn10291	0.0151216
COMMON	fig|83332.1.peg.647	rxn03394	fig|83332.1.peg.647rxn03394	0.966131		COMMON	fig|83332.1.peg.647	rxn03394	fig|83332.1.peg.647rxn03394	0.966131
COMMON	fig|83332.1.peg.1736	rxn09953	fig|83332.1.peg.1736rxn09953	0.774222		COMMON	fig|83332.1.peg.1736	rxn09953	fig|83332.1.peg.1736rxn09953	0.774222
COMMON	fig|83332.1.peg.1736	rxn01871	fig|83332.1.peg.1736rxn01871	0.774222		COMMON	fig|83332.1.peg.1736	rxn01871	fig|83332.1.peg.1736rxn01871	0.774222
COMMON	fig|83332.1.peg.1733	rxn00979	fig|83332.1.peg.1733rxn00979	0.0680542		COMMON	fig|83332.1.peg.1733	rxn00979	fig|83332.1.peg.1733rxn00979	0.0680542
COMMON	fig|83332.1.peg.423	rxn09997	fig|83332.1.peg.423rxn09997	0.743402		COMMON	fig|83332.1.peg.423	rxn09997	fig|83332.1.peg.423rxn09997	0.743402
COMMON	fig|83332.1.peg.3786	rxn10196	fig|83332.1.peg.3786rxn10196	0.137053		COMMON	fig|83332.1.peg.3786	rxn10196	fig|83332.1.peg.3786rxn10196	0.137053
COMMON	fig|83332.1.peg.3786	rxn10195	fig|83332.1.peg.3786rxn10195	0.137053		COMMON	fig|83332.1.peg.3786	rxn10195	fig|83332.1.peg.3786rxn10195	0.137053
COMMON	fig|83332.1.peg.3786	rxn10194	fig|83332.1.peg.3786rxn10194	0.137053		COMMON	fig|83332.1.peg.3786	rxn10194	fig|83332.1.peg.3786rxn10194	0.137053
COMMON	fig|83332.1.peg.3784	rxn10196	fig|83332.1.peg.3784rxn10196	0.786114		COMMON	fig|83332.1.peg.3784	rxn10196	fig|83332.1.peg.3784rxn10196	0.786114
COMMON	fig|83332.1.peg.3784	rxn10195	fig|83332.1.peg.3784rxn10195	0.786114		COMMON	fig|83332.1.peg.3784	rxn10195	fig|83332.1.peg.3784rxn10195	0.786114
COMMON	fig|83332.1.peg.3784	rxn10194	fig|83332.1.peg.3784rxn10194	0.786114		COMMON	fig|83332.1.peg.3784	rxn10194	fig|83332.1.peg.3784rxn10194	0.786114
COMMON	fig|83332.1.peg.534	rxn08333	fig|83332.1.peg.534rxn08333	0.658053		COMMON	fig|83332.1.peg.534	rxn08333	fig|83332.1.peg.534rxn08333	0.658053
COMMON	fig|83332.1.peg.1028	rxn02449	fig|83332.1.peg.1028rxn02449	0.00315345		COMMON	fig|83332.1.peg.1028	rxn02449	fig|83332.1.peg.1028rxn02449	0.00315345
COMMON	fig|83332.1.peg.3293	rxn00856	fig|83332.1.peg.3293rxn00856	0.0175905		COMMON	fig|83332.1.peg.3293	rxn00856	fig|83332.1.peg.3293rxn00856	0.0175905
COMMON	fig|83332.1.peg.3393	rxn03150	fig|83332.1.peg.3393rxn03150	0.434439		COMMON	fig|83332.1.peg.3393	rxn03150	fig|83332.1.peg.3393rxn03150	0.434439
COMMON	fig|83332.1.peg.480	rxn01630	fig|83332.1.peg.480rxn01630	0.00237117		COMMON	fig|83332.1.peg.480	rxn01630	fig|83332.1.peg.480rxn01630	0.00237117
COMMON	fig|83333.1.peg.2639	rxn05192	fig|83333.1.peg.2639rxn05192	0.31564		COMMON	fig|83333.1.peg.2639	rxn05192	fig|83333.1.peg.2639rxn05192	0.31564
COMMON	fig|83333.1.peg.1679	rxn01923	fig|83333.1.peg.1679rxn01923	0.337277		COMMON	fig|83333.1.peg.1679	rxn01923	fig|83333.1.peg.1679rxn01923	0.337277
COMMON	fig|83333.1.peg.1383	rxn03433	fig|83333.1.peg.1383rxn03433	0.020745		COMMON	fig|83333.1.peg.1383	rxn03433	fig|83333.1.peg.1383rxn03433	0.020745
COMMON	fig|83333.1.peg.3760	rxn10094	fig|83333.1.peg.3760rxn10094	0.82801		COMMON	fig|83333.1.peg.3760	rxn10094	fig|83333.1.peg.3760rxn10094	0.82801
COMMON	fig|83333.1.peg.3760	rxn03397	fig|83333.1.peg.3760rxn03397	0.82801		COMMON	fig|83333.1.peg.3760	rxn03397	fig|83333.1.peg.3760rxn03397	0.82801
COMMON	fig|83333.1.peg.3907	rxn09997	fig|83333.1.peg.3907rxn09997	0.751399		COMMON	fig|83333.1.peg.3907	rxn09997	fig|83333.1.peg.3907rxn09997	0.751399
COMMON	fig|83333.1.peg.31	rxn02929	fig|83333.1.peg.31rxn02929	0.442602		COMMON	fig|83333.1.peg.31	rxn02929	fig|83333.1.peg.31rxn02929	0.442602
COMMON	fig|83333.1.peg.3746	rxn09128	fig|83333.1.peg.3746rxn09128	0.983426		COMMON	fig|83333.1.peg.3746	rxn09128	fig|83333.1.peg.3746rxn09128	0.983426
COMMON	fig|83333.1.peg.3746	rxn09129	fig|83333.1.peg.3746rxn09129	0.983426		COMMON	fig|83333.1.peg.3746	rxn09129	fig|83333.1.peg.3746rxn09129	0.983426
COMMON	fig|83333.1.peg.3746	rxn09160	fig|83333.1.peg.3746rxn09160	0.983426		COMMON	fig|83333.1.peg.3746	rxn09160	fig|83333.1.peg.3746rxn09160	0.983426
COMMON	fig|83333.1.peg.3746	rxn09161	fig|83333.1.peg.3746rxn09161	0.983426		COMMON	fig|83333.1.peg.3746	rxn09161	fig|83333.1.peg.3746rxn09161	0.983426
COMMON	fig|83333.1.peg.3746	rxn09162	fig|83333.1.peg.3746rxn09162	0.983426		COMMON	fig|83333.1.peg.3746	rxn09162	fig|83333.1.peg.3746rxn09162	0.983426
COMMON	fig|83333.1.peg.3746	rxn09163	fig|83333.1.peg.3746rxn09163	0.983426		COMMON	fig|83333.1.peg.3746	rxn09163	fig|83333.1.peg.3746rxn09163	0.983426
COMMON	fig|83333.1.peg.3746	rxn09123	fig|83333.1.peg.3746rxn09123	0.983426		COMMON	fig|83333.1.peg.3746	rxn09123	fig|83333.1.peg.3746rxn09123	0.983426
COMMON	fig|83333.1.peg.3746	rxn09124	fig|83333.1.peg.3746rxn09124	0.983426		COMMON	fig|83333.1.peg.3746	rxn09124	fig|83333.1.peg.3746rxn09124	0.983426
COMMON	fig|83333.1.peg.3746	rxn09125	fig|83333.1.peg.3746rxn09125	0.983426		COMMON	fig|83333.1.peg.3746	rxn09125	fig|83333.1.peg.3746rxn09125	0.983426
COMMON	fig|83333.1.peg.3746	rxn09126	fig|83333.1.peg.3746rxn09126	0.983426		COMMON	fig|83333.1.peg.3746	rxn09126	fig|83333.1.peg.3746rxn09126	0.983426
COMMON	fig|83333.1.peg.3746	rxn09127	fig|83333.1.peg.3746rxn09127	0.983426		COMMON	fig|83333.1.peg.3746	rxn09127	fig|83333.1.peg.3746rxn09127	0.983426
COMMON	fig|83333.1.peg.3746	rxn09164	fig|83333.1.peg.3746rxn09164	0.983426		COMMON	fig|83333.1.peg.3746	rxn09164	fig|83333.1.peg.3746rxn09164	0.983426
COMMON	fig|83333.1.peg.3746	rxn09159	fig|83333.1.peg.3746rxn09159	0.983426		COMMON	fig|83333.1.peg.3746	rxn09159	fig|83333.1.peg.3746rxn09159	0.983426
COMMON	fig|83333.1.peg.3746	rxn09158	fig|83333.1.peg.3746rxn09158	0.983426		COMMON	fig|83333.1.peg.3746	rxn09158	fig|83333.1.peg.3746rxn09158	0.983426
COMMON	fig|83333.1.peg.3746	rxn09155	fig|83333.1.peg.3746rxn09155	0.983426		COMMON	fig|83333.1.peg.3746	rxn09155	fig|83333.1.peg.3746rxn09155	0.983426
COMMON	fig|83333.1.peg.3746	rxn09154	fig|83333.1.peg.3746rxn09154	0.983426		COMMON	fig|83333.1.peg.3746	rxn09154	fig|83333.1.peg.3746rxn09154	0.983426
COMMON	fig|83333.1.peg.3746	rxn09157	fig|83333.1.peg.3746rxn09157	0.983426		COMMON	fig|83333.1.peg.3746	rxn09157	fig|83333.1.peg.3746rxn09157	0.983426
COMMON	fig|83333.1.peg.3746	rxn09151	fig|83333.1.peg.3746rxn09151	0.983426		COMMON	fig|83333.1.peg.3746	rxn09151	fig|83333.1.peg.3746rxn09151	0.983426
COMMON	fig|83333.1.peg.3746	rxn09150	fig|83333.1.peg.3746rxn09150	0.983426		COMMON	fig|83333.1.peg.3746	rxn09150	fig|83333.1.peg.3746rxn09150	0.983426
COMMON	fig|83333.1.peg.3746	rxn09153	fig|83333.1.peg.3746rxn09153	0.983426		COMMON	fig|83333.1.peg.3746	rxn09153	fig|83333.1.peg.3746rxn09153	0.983426
COMMON	fig|83333.1.peg.3746	rxn09152	fig|83333.1.peg.3746rxn09152	0.983426		COMMON	fig|83333.1.peg.3746	rxn09152	fig|83333.1.peg.3746rxn09152	0.983426
COMMON	fig|83333.1.peg.3746	rxn09139	fig|83333.1.peg.3746rxn09139	0.983426		COMMON	fig|83333.1.peg.3746	rxn09139	fig|83333.1.peg.3746rxn09139	0.983426
COMMON	fig|83333.1.peg.3746	rxn09138	fig|83333.1.peg.3746rxn09138	0.983426		COMMON	fig|83333.1.peg.3746	rxn09138	fig|83333.1.peg.3746rxn09138	0.983426
COMMON	fig|83333.1.peg.3746	rxn09133	fig|83333.1.peg.3746rxn09133	0.983426		COMMON	fig|83333.1.peg.3746	rxn09133	fig|83333.1.peg.3746rxn09133	0.983426
COMMON	fig|83333.1.peg.3746	rxn09132	fig|83333.1.peg.3746rxn09132	0.983426		COMMON	fig|83333.1.peg.3746	rxn09132	fig|83333.1.peg.3746rxn09132	0.983426
COMMON	fig|83333.1.peg.3746	rxn09131	fig|83333.1.peg.3746rxn09131	0.983426		COMMON	fig|83333.1.peg.3746	rxn09131	fig|83333.1.peg.3746rxn09131	0.983426
COMMON	fig|83333.1.peg.3746	rxn09130	fig|83333.1.peg.3746rxn09130	0.983426		COMMON	fig|83333.1.peg.3746	rxn09130	fig|83333.1.peg.3746rxn09130	0.983426
COMMON	fig|83333.1.peg.3746	rxn09137	fig|83333.1.peg.3746rxn09137	0.983426		COMMON	fig|83333.1.peg.3746	rxn09137	fig|83333.1.peg.3746rxn09137	0.983426
COMMON	fig|83333.1.peg.3746	rxn09136	fig|83333.1.peg.3746rxn09136	0.983426		COMMON	fig|83333.1.peg.3746	rxn09136	fig|83333.1.peg.3746rxn09136	0.983426
COMMON	fig|83333.1.peg.3746	rxn09135	fig|83333.1.peg.3746rxn09135	0.983426		COMMON	fig|83333.1.peg.3746	rxn09135	fig|83333.1.peg.3746rxn09135	0.983426
COMMON	fig|83333.1.peg.3746	rxn09134	fig|83333.1.peg.3746rxn09134	0.983426		COMMON	fig|83333.1.peg.3746	rxn09134	fig|83333.1.peg.3746rxn09134	0.983426
COMMON	fig|83333.1.peg.3746	rxn09148	fig|83333.1.peg.3746rxn09148	0.983426		COMMON	fig|83333.1.peg.3746	rxn09148	fig|83333.1.peg.3746rxn09148	0.983426
COMMON	fig|83333.1.peg.3746	rxn09142	fig|83333.1.peg.3746rxn09142	0.983426		COMMON	fig|83333.1.peg.3746	rxn09142	fig|83333.1.peg.3746rxn09142	0.983426
COMMON	fig|83333.1.peg.3746	rxn09143	fig|83333.1.peg.3746rxn09143	0.983426		COMMON	fig|83333.1.peg.3746	rxn09143	fig|83333.1.peg.3746rxn09143	0.983426
COMMON	fig|83333.1.peg.3746	rxn09140	fig|83333.1.peg.3746rxn09140	0.983426		COMMON	fig|83333.1.peg.3746	rxn09140	fig|83333.1.peg.3746rxn09140	0.983426
COMMON	fig|83333.1.peg.3746	rxn09141	fig|83333.1.peg.3746rxn09141	0.983426		COMMON	fig|83333.1.peg.3746	rxn09141	fig|83333.1.peg.3746rxn09141	0.983426
COMMON	fig|83333.1.peg.3746	rxn09146	fig|83333.1.peg.3746rxn09146	0.983426		COMMON	fig|83333.1.peg.3746	rxn09146	fig|83333.1.peg.3746rxn09146	0.983426
COMMON	fig|83333.1.peg.2224	rxn03168	fig|83333.1.peg.2224rxn03168	0.0373994		COMMON	fig|83333.1.peg.2224	rxn03168	fig|83333.1.peg.2224rxn03168	0.0373994
COMMON	fig|83333.1.peg.2951	rxn05416	fig|83333.1.peg.2951rxn05416	0.360898		COMMON	fig|83333.1.peg.2951	rxn05416	fig|83333.1.peg.2951rxn05416	0.360898
COMMON	fig|83333.1.peg.2951	rxn05412	fig|83333.1.peg.2951rxn05412	0.360898		COMMON	fig|83333.1.peg.2951	rxn05412	fig|83333.1.peg.2951rxn05412	0.360898
COMMON	fig|83333.1.peg.2951	rxn05428	fig|83333.1.peg.2951rxn05428	0.360898		COMMON	fig|83333.1.peg.2951	rxn05428	fig|83333.1.peg.2951rxn05428	0.360898
COMMON	fig|83333.1.peg.2951	rxn05432	fig|83333.1.peg.2951rxn05432	0.360898		COMMON	fig|83333.1.peg.2951	rxn05432	fig|83333.1.peg.2951rxn05432	0.360898
COMMON	fig|83333.1.peg.2951	rxn05424	fig|83333.1.peg.2951rxn05424	0.360898		COMMON	fig|83333.1.peg.2951	rxn05424	fig|83333.1.peg.2951rxn05424	0.360898
COMMON	fig|83333.1.peg.2951	rxn05420	fig|83333.1.peg.2951rxn05420	0.360898		COMMON	fig|83333.1.peg.2951	rxn05420	fig|83333.1.peg.2951rxn05420	0.360898
COMMON	fig|83333.1.peg.180	rxn05406	fig|83333.1.peg.180rxn05406	0.709716		COMMON	fig|83333.1.peg.180	rxn05406	fig|83333.1.peg.180rxn05406	0.709716
COMMON	fig|83333.1.peg.180	rxn05369	fig|83333.1.peg.180rxn05369	0.709716		COMMON	fig|83333.1.peg.180	rxn05369	fig|83333.1.peg.180rxn05369	0.709716
COMMON	fig|83333.1.peg.180	rxn05402	fig|83333.1.peg.180rxn05402	0.709716		COMMON	fig|83333.1.peg.180	rxn05402	fig|83333.1.peg.180rxn05402	0.709716
COMMON	fig|83333.1.peg.180	rxn05386	fig|83333.1.peg.180rxn05386	0.709716		COMMON	fig|83333.1.peg.180	rxn05386	fig|83333.1.peg.180rxn05386	0.709716
COMMON	fig|83333.1.peg.180	rxn05381	fig|83333.1.peg.180rxn05381	0.709716		COMMON	fig|83333.1.peg.180	rxn05381	fig|83333.1.peg.180rxn05381	0.709716
COMMON	fig|83333.1.peg.180	rxn05398	fig|83333.1.peg.180rxn05398	0.709716		COMMON	fig|83333.1.peg.180	rxn05398	fig|83333.1.peg.180rxn05398	0.709716
COMMON	fig|83333.1.peg.180	rxn05377	fig|83333.1.peg.180rxn05377	0.709716		COMMON	fig|83333.1.peg.180	rxn05377	fig|83333.1.peg.180rxn05377	0.709716
COMMON	fig|83333.1.peg.180	rxn05361	fig|83333.1.peg.180rxn05361	0.709716		COMMON	fig|83333.1.peg.180	rxn05361	fig|83333.1.peg.180rxn05361	0.709716
COMMON	fig|83333.1.peg.180	rxn05373	fig|83333.1.peg.180rxn05373	0.709716		COMMON	fig|83333.1.peg.180	rxn05373	fig|83333.1.peg.180rxn05373	0.709716
COMMON	fig|83333.1.peg.180	rxn05365	fig|83333.1.peg.180rxn05365	0.709716		COMMON	fig|83333.1.peg.180	rxn05365	fig|83333.1.peg.180rxn05365	0.709716
COMMON	fig|83333.1.peg.180	rxn05394	fig|83333.1.peg.180rxn05394	0.709716		COMMON	fig|83333.1.peg.180	rxn05394	fig|83333.1.peg.180rxn05394	0.709716
COMMON	fig|83333.1.peg.180	rxn05462	fig|83333.1.peg.180rxn05462	0.709716		COMMON	fig|83333.1.peg.180	rxn05462	fig|83333.1.peg.180rxn05462	0.709716
COMMON	fig|83333.1.peg.180	rxn05390	fig|83333.1.peg.180rxn05390	0.709716		COMMON	fig|83333.1.peg.180	rxn05390	fig|83333.1.peg.180rxn05390	0.709716
COMMON	fig|83333.1.peg.4159	rxn05416	fig|83333.1.peg.4159rxn05416	0.415119		COMMON	fig|83333.1.peg.4159	rxn05416	fig|83333.1.peg.4159rxn05416	0.415119
COMMON	fig|83333.1.peg.4159	rxn05412	fig|83333.1.peg.4159rxn05412	0.415119		COMMON	fig|83333.1.peg.4159	rxn05412	fig|83333.1.peg.4159rxn05412	0.415119
COMMON	fig|83333.1.peg.4159	rxn05428	fig|83333.1.peg.4159rxn05428	0.415119		COMMON	fig|83333.1.peg.4159	rxn05428	fig|83333.1.peg.4159rxn05428	0.415119
COMMON	fig|83333.1.peg.4159	rxn05432	fig|83333.1.peg.4159rxn05432	0.415119		COMMON	fig|83333.1.peg.4159	rxn05432	fig|83333.1.peg.4159rxn05432	0.415119
COMMON	fig|83333.1.peg.4159	rxn05424	fig|83333.1.peg.4159rxn05424	0.415119		COMMON	fig|83333.1.peg.4159	rxn05424	fig|83333.1.peg.4159rxn05424	0.415119
COMMON	fig|83333.1.peg.4159	rxn05420	fig|83333.1.peg.4159rxn05420	0.415119		COMMON	fig|83333.1.peg.4159	rxn05420	fig|83333.1.peg.4159rxn05420	0.415119
COMMON	fig|83333.1.peg.205	rxn10094	fig|83333.1.peg.205rxn10094	0.729096		COMMON	fig|83333.1.peg.205	rxn10094	fig|83333.1.peg.205rxn10094	0.729096
COMMON	fig|83333.1.peg.205	rxn03397	fig|83333.1.peg.205rxn03397	0.729096		COMMON	fig|83333.1.peg.205	rxn03397	fig|83333.1.peg.205rxn03397	0.729096
COMMON	fig|83333.1.peg.264	rxn01644	fig|83333.1.peg.264rxn01644	0.0198379		COMMON	fig|83333.1.peg.264	rxn01644	fig|83333.1.peg.264rxn01644	0.0198379
COMMON	fig|83333.1.peg.2694	rxn03057	fig|83333.1.peg.2694rxn03057	0.011367		COMMON	fig|83333.1.peg.2694	rxn03057	fig|83333.1.peg.2694rxn03057	0.011367
COMMON	fig|83333.1.peg.2694	rxn05104	fig|83333.1.peg.2694rxn05104	0.231542		COMMON	fig|83333.1.peg.2694	rxn05104	fig|83333.1.peg.2694rxn05104	0.231542
COMMON	fig|83333.1.peg.171	rxn00119	fig|83333.1.peg.171rxn00119	0.952098		COMMON	fig|83333.1.peg.171	rxn00119	fig|83333.1.peg.171rxn00119	0.952098
COMMON	fig|83333.1.peg.345	rxn03038	fig|83333.1.peg.345rxn03038	0.698925		COMMON	fig|83333.1.peg.345	rxn03038	fig|83333.1.peg.345rxn03038	0.698925
COMMON	fig|83333.1.peg.345	rxn04603	fig|83333.1.peg.345rxn04603	0.698925		COMMON	fig|83333.1.peg.345	rxn04603	fig|83333.1.peg.345rxn04603	0.698925
COMMON	fig|83333.1.peg.1966	rxn03538	fig|83333.1.peg.1966rxn03538	0.804497		COMMON	fig|83333.1.peg.1966	rxn03538	fig|83333.1.peg.1966rxn03538	0.804497
COMMON	fig|83333.1.peg.3563	rxn08619	fig|83333.1.peg.3563rxn08619	0.591035		COMMON	fig|83333.1.peg.3563	rxn08619	fig|83333.1.peg.3563rxn08619	0.591035
COMMON	fig|83333.1.peg.3290	rxn01111	fig|83333.1.peg.3290rxn01111	0.666742		COMMON	fig|83333.1.peg.3290	rxn01111	fig|83333.1.peg.3290rxn01111	0.666742
COMMON	fig|83333.1.peg.2009	rxn03030	fig|83333.1.peg.2009rxn03030	0.0869194		COMMON	fig|83333.1.peg.2009	rxn03030	fig|83333.1.peg.2009rxn03030	0.0869194
COMMON	fig|83333.1.peg.2237	rxn11703	fig|83333.1.peg.2237rxn11703	0.946513		COMMON	fig|83333.1.peg.2237	rxn11703	fig|83333.1.peg.2237rxn11703	0.946513
COMMON	fig|83333.1.peg.3849	rxn08333	fig|83333.1.peg.3849rxn08333	0.556595		COMMON	fig|83333.1.peg.3849	rxn08333	fig|83333.1.peg.3849rxn08333	0.556595
COMMON	fig|83333.1.peg.3562	rxn08620	fig|83333.1.peg.3562rxn08620	0.124471		COMMON	fig|83333.1.peg.3562	rxn08620	fig|83333.1.peg.3562rxn08620	0.124471
COMMON	fig|83333.1.peg.472	rxn01022	fig|83333.1.peg.472rxn01022	0.285309		COMMON	fig|83333.1.peg.472	rxn01022	fig|83333.1.peg.472rxn01022	0.285309
COMMON	fig|83333.1.peg.1327	rxn01972	fig|83333.1.peg.1327rxn01972	0.397416		COMMON	fig|83333.1.peg.1327	rxn01972	fig|83333.1.peg.1327rxn01972	0.397416
COMMON	fig|83333.1.peg.315	rxn02270	fig|83333.1.peg.315rxn02270	0.593386		COMMON	fig|83333.1.peg.315	rxn02270	fig|83333.1.peg.315rxn02270	0.593386
COMMON	fig|83333.1.peg.3038	rxn01122	fig|83333.1.peg.3038rxn01122	0.694317		COMMON	fig|83333.1.peg.3038	rxn01122	fig|83333.1.peg.3038rxn01122	0.694317
COMMON	fig|85962.1.peg.287	rxn01000	fig|85962.1.peg.287rxn01000	0.364776		COMMON	fig|85962.1.peg.287	rxn01000	fig|85962.1.peg.287rxn01000	0.364776
COMMON	fig|85962.1.peg.1581	rxn08619	fig|85962.1.peg.1581rxn08619	0.259567		COMMON	fig|85962.1.peg.1581	rxn08619	fig|85962.1.peg.1581rxn08619	0.259567
COMMON	fig|85962.1.peg.1581	rxn08620	fig|85962.1.peg.1581rxn08620	0.0574917		COMMON	fig|85962.1.peg.1581	rxn08620	fig|85962.1.peg.1581rxn08620	0.0574917
COMMON	fig|85962.1.peg.1463	rxn03393	fig|85962.1.peg.1463rxn03393	0.899934		COMMON	fig|85962.1.peg.1463	rxn03393	fig|85962.1.peg.1463rxn03393	0.899934
COMMON	fig|85962.1.peg.505	rxn02929	fig|85962.1.peg.505rxn02929	0.281177		COMMON	fig|85962.1.peg.505	rxn02929	fig|85962.1.peg.505rxn02929	0.281177
COMMON	fig|85962.1.peg.1000	rxn01644	fig|85962.1.peg.1000rxn01644	0.0358899		COMMON	fig|85962.1.peg.1000	rxn01644	fig|85962.1.peg.1000rxn01644	0.0358899
COMMON	fig|85962.1.peg.1348	rxn08333	fig|85962.1.peg.1348rxn08333	0.101199		COMMON	fig|85962.1.peg.1348	rxn08333	fig|85962.1.peg.1348rxn08333	0.101199
COMMON	fig|85962.1.peg.1348	rxn03893	fig|85962.1.peg.1348rxn03893	0.0981804		COMMON	fig|85962.1.peg.1348	rxn03893	fig|85962.1.peg.1348rxn03893	0.0981804
COMMON	fig|85962.1.peg.1470	rxn03397	fig|85962.1.peg.1470rxn03397	0.696683		COMMON	fig|85962.1.peg.1470	rxn03397	fig|85962.1.peg.1470rxn03397	0.696683
COMMON	fig|85962.1.peg.1470	rxn10094	fig|85962.1.peg.1470rxn10094	0.696683		COMMON	fig|85962.1.peg.1470	rxn10094	fig|85962.1.peg.1470rxn10094	0.696683
COMMON	fig|85962.1.peg.1387	rxn05029	fig|85962.1.peg.1387rxn05029	0.000298424		COMMON	fig|85962.1.peg.1387	rxn05029	fig|85962.1.peg.1387rxn05029	0.000298424
COMMON	fig|85962.1.peg.274	rxn02449	fig|85962.1.peg.274rxn02449	0.00181128		COMMON	fig|85962.1.peg.274	rxn02449	fig|85962.1.peg.274rxn02449	0.00181128
COMMON	fig|85962.1.peg.156	rxn08620	fig|85962.1.peg.156rxn08620	0.059387		COMMON	fig|85962.1.peg.156	rxn08620	fig|85962.1.peg.156rxn08620	0.059387
COMMON	fig|85962.1.peg.305	rxn03869	fig|85962.1.peg.305rxn03869	0.0105376		COMMON	fig|85962.1.peg.305	rxn03869	fig|85962.1.peg.305rxn03869	0.0105376
COMMON	fig|85962.1.peg.305	rxn02222	fig|85962.1.peg.305rxn02222	0.0105376		COMMON	fig|85962.1.peg.305	rxn02222	fig|85962.1.peg.305rxn02222	0.0105376
COMMON	fig|85962.1.peg.305	rxn03839	fig|85962.1.peg.305rxn03839	0.0105376		COMMON	fig|85962.1.peg.305	rxn03839	fig|85962.1.peg.305rxn03839	0.0105376
COMMON	fig|85962.1.peg.768	rxn00119	fig|85962.1.peg.768rxn00119	0.978912		COMMON	fig|85962.1.peg.768	rxn00119	fig|85962.1.peg.768rxn00119	0.978912
COMMON	fig|85962.1.peg.494	rxn09132	fig|85962.1.peg.494rxn09132	0.91674		COMMON	fig|85962.1.peg.494	rxn09132	fig|85962.1.peg.494rxn09132	0.91674
COMMON	fig|85962.1.peg.494	rxn09131	fig|85962.1.peg.494rxn09131	0.91674		COMMON	fig|85962.1.peg.494	rxn09131	fig|85962.1.peg.494rxn09131	0.91674
COMMON	fig|85962.1.peg.494	rxn09130	fig|85962.1.peg.494rxn09130	0.91674		COMMON	fig|85962.1.peg.494	rxn09130	fig|85962.1.peg.494rxn09130	0.91674
COMMON	fig|85962.1.peg.494	rxn09147	fig|85962.1.peg.494rxn09147	0.91674		COMMON	fig|85962.1.peg.494	rxn09147	fig|85962.1.peg.494rxn09147	0.91674
COMMON	fig|85962.1.peg.494	rxn09148	fig|85962.1.peg.494rxn09148	0.91674		COMMON	fig|85962.1.peg.494	rxn09148	fig|85962.1.peg.494rxn09148	0.91674
COMMON	fig|85962.1.peg.494	rxn09149	fig|85962.1.peg.494rxn09149	0.91674		COMMON	fig|85962.1.peg.494	rxn09149	fig|85962.1.peg.494rxn09149	0.91674
COMMON	fig|85962.1.peg.494	rxn09144	fig|85962.1.peg.494rxn09144	0.91674		COMMON	fig|85962.1.peg.494	rxn09144	fig|85962.1.peg.494rxn09144	0.91674
COMMON	fig|85962.1.peg.494	rxn09154	fig|85962.1.peg.494rxn09154	0.91674		COMMON	fig|85962.1.peg.494	rxn09154	fig|85962.1.peg.494rxn09154	0.91674
COMMON	fig|85962.1.peg.494	rxn09145	fig|85962.1.peg.494rxn09145	0.91674		COMMON	fig|85962.1.peg.494	rxn09145	fig|85962.1.peg.494rxn09145	0.91674
COMMON	fig|85962.1.peg.494	rxn09146	fig|85962.1.peg.494rxn09146	0.91674		COMMON	fig|85962.1.peg.494	rxn09146	fig|85962.1.peg.494rxn09146	0.91674
COMMON	fig|85962.1.peg.494	rxn09150	fig|85962.1.peg.494rxn09150	0.91674		COMMON	fig|85962.1.peg.494	rxn09150	fig|85962.1.peg.494rxn09150	0.91674
COMMON	fig|85962.1.peg.494	rxn09153	fig|85962.1.peg.494rxn09153	0.91674		COMMON	fig|85962.1.peg.494	rxn09153	fig|85962.1.peg.494rxn09153	0.91674
COMMON	fig|85962.1.peg.494	rxn09152	fig|85962.1.peg.494rxn09152	0.91674		COMMON	fig|85962.1.peg.494	rxn09152	fig|85962.1.peg.494rxn09152	0.91674
COMMON	fig|85962.1.peg.1363	rxn05381	fig|85962.1.peg.1363rxn05381	0.783324		COMMON	fig|85962.1.peg.1363	rxn05381	fig|85962.1.peg.1363rxn05381	0.783324
COMMON	fig|85962.1.peg.1363	rxn05390	fig|85962.1.peg.1363rxn05390	0.783324		COMMON	fig|85962.1.peg.1363	rxn05390	fig|85962.1.peg.1363rxn05390	0.783324
COMMON	fig|85962.1.peg.1363	rxn05402	fig|85962.1.peg.1363rxn05402	0.783324		COMMON	fig|85962.1.peg.1363	rxn05402	fig|85962.1.peg.1363rxn05402	0.783324
COMMON	fig|85962.1.peg.1363	rxn05386	fig|85962.1.peg.1363rxn05386	0.783324		COMMON	fig|85962.1.peg.1363	rxn05386	fig|85962.1.peg.1363rxn05386	0.783324
COMMON	fig|85962.1.peg.1363	rxn05394	fig|85962.1.peg.1363rxn05394	0.783324		COMMON	fig|85962.1.peg.1363	rxn05394	fig|85962.1.peg.1363rxn05394	0.783324
COMMON	fig|85962.1.peg.1363	rxn05377	fig|85962.1.peg.1363rxn05377	0.783324		COMMON	fig|85962.1.peg.1363	rxn05377	fig|85962.1.peg.1363rxn05377	0.783324
COMMON	fig|85962.1.peg.1363	rxn05398	fig|85962.1.peg.1363rxn05398	0.783324		COMMON	fig|85962.1.peg.1363	rxn05398	fig|85962.1.peg.1363rxn05398	0.783324
COMMON	fig|85962.1.peg.1363	rxn05332	fig|85962.1.peg.1363rxn05332	0.783324		COMMON	fig|85962.1.peg.1363	rxn05332	fig|85962.1.peg.1363rxn05332	0.783324
COMMON	fig|85962.1.peg.1363	rxn05373	fig|85962.1.peg.1363rxn05373	0.783324		COMMON	fig|85962.1.peg.1363	rxn05373	fig|85962.1.peg.1363rxn05373	0.783324
COMMON	fig|85962.1.peg.1363	rxn05369	fig|85962.1.peg.1363rxn05369	0.783324		COMMON	fig|85962.1.peg.1363	rxn05369	fig|85962.1.peg.1363rxn05369	0.783324
COMMON	fig|85962.1.peg.1363	rxn05331	fig|85962.1.peg.1363rxn05331	0.783324		COMMON	fig|85962.1.peg.1363	rxn05331	fig|85962.1.peg.1363rxn05331	0.783324
COMMON	fig|85962.1.peg.1363	rxn05330	fig|85962.1.peg.1363rxn05330	0.783324		COMMON	fig|85962.1.peg.1363	rxn05330	fig|85962.1.peg.1363rxn05330	0.783324
COMMON	fig|85962.1.peg.1363	rxn05333	fig|85962.1.peg.1363rxn05333	0.783324		COMMON	fig|85962.1.peg.1363	rxn05333	fig|85962.1.peg.1363rxn05333	0.783324
COMMON	fig|85962.1.peg.1363	rxn05462	fig|85962.1.peg.1363rxn05462	0.783324		COMMON	fig|85962.1.peg.1363	rxn05462	fig|85962.1.peg.1363rxn05462	0.783324
COMMON	fig|85962.1.peg.1363	rxn05335	fig|85962.1.peg.1363rxn05335	0.783324		COMMON	fig|85962.1.peg.1363	rxn05335	fig|85962.1.peg.1363rxn05335	0.783324
COMMON	fig|85962.1.peg.1363	rxn05334	fig|85962.1.peg.1363rxn05334	0.783324		COMMON	fig|85962.1.peg.1363	rxn05334	fig|85962.1.peg.1363rxn05334	0.783324
COMMON	fig|85962.1.peg.1363	rxn05329	fig|85962.1.peg.1363rxn05329	0.783324		COMMON	fig|85962.1.peg.1363	rxn05329	fig|85962.1.peg.1363rxn05329	0.783324
COMMON	fig|85962.1.peg.1363	rxn05406	fig|85962.1.peg.1363rxn05406	0.783324		COMMON	fig|85962.1.peg.1363	rxn05406	fig|85962.1.peg.1363rxn05406	0.783324
COMMON	fig|85962.1.peg.1363	rxn05365	fig|85962.1.peg.1363rxn05365	0.783324		COMMON	fig|85962.1.peg.1363	rxn05365	fig|85962.1.peg.1363rxn05365	0.783324
COMMON	fig|85962.1.peg.1363	rxn05361	fig|85962.1.peg.1363rxn05361	0.783324		COMMON	fig|85962.1.peg.1363	rxn05361	fig|85962.1.peg.1363rxn05361	0.783324
COMMON	fig|85962.1.peg.1275	rxn01537	fig|85962.1.peg.1275rxn01537	0.230671		COMMON	fig|85962.1.peg.1275	rxn01537	fig|85962.1.peg.1275rxn01537	0.230671
COMMON	fig|85962.1.peg.390	rxn03130	fig|85962.1.peg.390rxn03130	0.0373814		COMMON	fig|85962.1.peg.390	rxn03130	fig|85962.1.peg.390rxn03130	0.0373814
COMMON	fig|85962.1.peg.737	rxn03030	fig|85962.1.peg.737rxn03030	0.00202662		COMMON	fig|85962.1.peg.737	rxn03030	fig|85962.1.peg.737rxn03030	0.00202662
COMMON	fig|85962.1.peg.392	rxn03393	fig|85962.1.peg.392rxn03393	0.948602		COMMON	fig|85962.1.peg.392	rxn03393	fig|85962.1.peg.392rxn03393	0.948602
COMMON	fig|85962.1.peg.678	rxn05029	fig|85962.1.peg.678rxn05029	0.000244411		COMMON	fig|85962.1.peg.678	rxn05029	fig|85962.1.peg.678rxn05029	0.000244411
COMMON	fig|93062.4.peg.507	rxn02832	fig|93062.4.peg.507rxn02832	0.428545		COMMON	fig|93062.4.peg.507	rxn02832	fig|93062.4.peg.507rxn02832	0.428545
COMMON	fig|93062.4.peg.467	rxn00469	fig|93062.4.peg.467rxn00469	0.475609		COMMON	fig|93062.4.peg.467	rxn00469	fig|93062.4.peg.467rxn00469	0.475609
COMMON	fig|93062.4.peg.467	rxn01973	fig|93062.4.peg.467rxn01973	0.115911		COMMON	fig|93062.4.peg.467	rxn01973	fig|93062.4.peg.467rxn01973	0.115911
COMMON	fig|93062.4.peg.702	rxn10291	fig|93062.4.peg.702rxn10291	0.52735		COMMON	fig|93062.4.peg.702	rxn10291	fig|93062.4.peg.702rxn10291	0.52735
COMMON	fig|93062.4.peg.702	rxn10292	fig|93062.4.peg.702rxn10292	0.52735		COMMON	fig|93062.4.peg.702	rxn10292	fig|93062.4.peg.702rxn10292	0.52735
COMMON	fig|93062.4.peg.702	rxn10293	fig|93062.4.peg.702rxn10293	0.52735		COMMON	fig|93062.4.peg.702	rxn10293	fig|93062.4.peg.702rxn10293	0.52735
COMMON	fig|93062.4.peg.163	rxn09953	fig|93062.4.peg.163rxn09953	0.0570449		COMMON	fig|93062.4.peg.163	rxn09953	fig|93062.4.peg.163rxn09953	0.0570449
COMMON	fig|93062.4.peg.379	rxn00748	fig|93062.4.peg.379rxn00748	0.658333		COMMON	fig|93062.4.peg.379	rxn00748	fig|93062.4.peg.379rxn00748	0.658333
COMMON	fig|93062.4.peg.706	rxn10197	fig|93062.4.peg.706rxn10197	0.0288937		COMMON	fig|93062.4.peg.706	rxn10197	fig|93062.4.peg.706rxn10197	0.0288937
COMMON	fig|93062.4.peg.273	rxn00748	fig|93062.4.peg.273rxn00748	0.612108		COMMON	fig|93062.4.peg.273	rxn00748	fig|93062.4.peg.273rxn00748	0.612108
COMMON	fig|93062.4.peg.1934	rxn00986	fig|93062.4.peg.1934rxn00986	0.912251		COMMON	fig|93062.4.peg.1934	rxn00986	fig|93062.4.peg.1934rxn00986	0.912251
COMMON	fig|93062.4.peg.2606	rxn01501	fig|93062.4.peg.2606rxn01501	0.942505		COMMON	fig|93062.4.peg.2606	rxn01501	fig|93062.4.peg.2606rxn01501	0.942505
COMMON	fig|93062.4.peg.1930	rxn01204	fig|93062.4.peg.1930rxn01204	0.768437		COMMON	fig|93062.4.peg.1930	rxn01204	fig|93062.4.peg.1930rxn01204	0.768437
COMMON	fig|93062.4.peg.858	rxn01618	fig|93062.4.peg.858rxn01618	0.580188		COMMON	fig|93062.4.peg.858	rxn01618	fig|93062.4.peg.858rxn01618	0.580188
COMMON	fig|93062.4.peg.110	rxn03643	fig|93062.4.peg.110rxn03643	0.613662		COMMON	fig|93062.4.peg.110	rxn03643	fig|93062.4.peg.110rxn03643	0.613662
COMMON	fig|93062.4.peg.1612	rxn02929	fig|93062.4.peg.1612rxn02929	0.271162		COMMON	fig|93062.4.peg.1612	rxn02929	fig|93062.4.peg.1612rxn02929	0.271162
COMMON	fig|93062.4.peg.1222	rxn11703	fig|93062.4.peg.1222rxn11703	0.793885		COMMON	fig|93062.4.peg.1222	rxn11703	fig|93062.4.peg.1222rxn11703	0.793885
COMMON	fig|93062.4.peg.1611	rxn01644	fig|93062.4.peg.1611rxn01644	0.026011		COMMON	fig|93062.4.peg.1611	rxn01644	fig|93062.4.peg.1611rxn01644	0.026011
COMMON	fig|93062.4.peg.1611	rxn02988	fig|93062.4.peg.1611rxn02988	0.0260684		COMMON	fig|93062.4.peg.1611	rxn02988	fig|93062.4.peg.1611rxn02988	0.0260684
COMMON	fig|93062.4.peg.1633	rxn09106	fig|93062.4.peg.1633rxn09106	0.496958		COMMON	fig|93062.4.peg.1633	rxn09106	fig|93062.4.peg.1633rxn09106	0.496958
COMMON	fig|93062.4.peg.1633	rxn09107	fig|93062.4.peg.1633rxn09107	0.496958		COMMON	fig|93062.4.peg.1633	rxn09107	fig|93062.4.peg.1633rxn09107	0.496958
COMMON	fig|93062.4.peg.1633	rxn09104	fig|93062.4.peg.1633rxn09104	0.496958		COMMON	fig|93062.4.peg.1633	rxn09104	fig|93062.4.peg.1633rxn09104	0.496958
COMMON	fig|93062.4.peg.1633	rxn09105	fig|93062.4.peg.1633rxn09105	0.496958		COMMON	fig|93062.4.peg.1633	rxn09105	fig|93062.4.peg.1633rxn09105	0.496958
COMMON	fig|93062.4.peg.1633	rxn09102	fig|93062.4.peg.1633rxn09102	0.496958		COMMON	fig|93062.4.peg.1633	rxn09102	fig|93062.4.peg.1633rxn09102	0.496958
COMMON	fig|93062.4.peg.1633	rxn09103	fig|93062.4.peg.1633rxn09103	0.496958		COMMON	fig|93062.4.peg.1633	rxn09103	fig|93062.4.peg.1633rxn09103	0.496958
COMMON	fig|93062.4.peg.1633	rxn09101	fig|93062.4.peg.1633rxn09101	0.496958		COMMON	fig|93062.4.peg.1633	rxn09101	fig|93062.4.peg.1633rxn09101	0.496958
COMMON	fig|93062.4.peg.1633	rxn10265	fig|93062.4.peg.1633rxn10265	0.496958		COMMON	fig|93062.4.peg.1633	rxn10265	fig|93062.4.peg.1633rxn10265	0.496958
COMMON	fig|93062.4.peg.1633	rxn10266	fig|93062.4.peg.1633rxn10266	0.496958		COMMON	fig|93062.4.peg.1633	rxn10266	fig|93062.4.peg.1633rxn10266	0.496958
COMMON	fig|93062.4.peg.1741	rxn03397	fig|93062.4.peg.1741rxn03397	0.694155		COMMON	fig|93062.4.peg.1741	rxn03397	fig|93062.4.peg.1741rxn03397	0.694155
COMMON	fig|93062.4.peg.1741	rxn10094	fig|93062.4.peg.1741rxn10094	0.694155		COMMON	fig|93062.4.peg.1741	rxn10094	fig|93062.4.peg.1741rxn10094	0.694155
COMMON	fig|93062.4.peg.2383	rxn05416	fig|93062.4.peg.2383rxn05416	0.33284		COMMON	fig|93062.4.peg.2383	rxn05416	fig|93062.4.peg.2383rxn05416	0.33284
COMMON	fig|93062.4.peg.2383	rxn05412	fig|93062.4.peg.2383rxn05412	0.33284		COMMON	fig|93062.4.peg.2383	rxn05412	fig|93062.4.peg.2383rxn05412	0.33284
COMMON	fig|93062.4.peg.2383	rxn05357	fig|93062.4.peg.2383rxn05357	0.33284		COMMON	fig|93062.4.peg.2383	rxn05357	fig|93062.4.peg.2383rxn05357	0.33284
COMMON	fig|93062.4.peg.2383	rxn05356	fig|93062.4.peg.2383rxn05356	0.33284		COMMON	fig|93062.4.peg.2383	rxn05356	fig|93062.4.peg.2383rxn05356	0.33284
COMMON	fig|93062.4.peg.2383	rxn05353	fig|93062.4.peg.2383rxn05353	0.33284		COMMON	fig|93062.4.peg.2383	rxn05353	fig|93062.4.peg.2383rxn05353	0.33284
COMMON	fig|93062.4.peg.2383	rxn05352	fig|93062.4.peg.2383rxn05352	0.33284		COMMON	fig|93062.4.peg.2383	rxn05352	fig|93062.4.peg.2383rxn05352	0.33284
COMMON	fig|93062.4.peg.2383	rxn05432	fig|93062.4.peg.2383rxn05432	0.33284		COMMON	fig|93062.4.peg.2383	rxn05432	fig|93062.4.peg.2383rxn05432	0.33284
COMMON	fig|93062.4.peg.2383	rxn05424	fig|93062.4.peg.2383rxn05424	0.33284		COMMON	fig|93062.4.peg.2383	rxn05424	fig|93062.4.peg.2383rxn05424	0.33284
COMMON	fig|93062.4.peg.2383	rxn05420	fig|93062.4.peg.2383rxn05420	0.33284		COMMON	fig|93062.4.peg.2383	rxn05420	fig|93062.4.peg.2383rxn05420	0.33284
COMMON	fig|93062.4.peg.2383	rxn05428	fig|93062.4.peg.2383rxn05428	0.33284		COMMON	fig|93062.4.peg.2383	rxn05428	fig|93062.4.peg.2383rxn05428	0.33284
COMMON	fig|93062.4.peg.1765	rxn01517	fig|93062.4.peg.1765rxn01517	0.970087		COMMON	fig|93062.4.peg.1765	rxn01517	fig|93062.4.peg.1765rxn01517	0.970087
COMMON	fig|93062.4.peg.1765	rxn00119	fig|93062.4.peg.1765rxn00119	0.970087		COMMON	fig|93062.4.peg.1765	rxn00119	fig|93062.4.peg.1765rxn00119	0.970087
COMMON	fig|93062.4.peg.1218	rxn08333	fig|93062.4.peg.1218rxn08333	0.494756		COMMON	fig|93062.4.peg.1218	rxn08333	fig|93062.4.peg.1218rxn08333	0.494756
COMMON	fig|93062.4.peg.2539	rxn03886	fig|93062.4.peg.2539rxn03886	0.0102213		COMMON	fig|93062.4.peg.2539	rxn03886	fig|93062.4.peg.2539rxn03886	0.0102213
COMMON	fig|93062.4.peg.205	rxn01022	fig|93062.4.peg.205rxn01022	0.0211086		COMMON	fig|93062.4.peg.205	rxn01022	fig|93062.4.peg.205rxn01022	0.0211086
COMMON	fig|93062.4.peg.1902	rxn01834	fig|93062.4.peg.1902rxn01834	0.237103		COMMON	fig|93062.4.peg.1902	rxn01834	fig|93062.4.peg.1902rxn01834	0.237103
COMMON	fig|93062.4.peg.1788	rxn00469	fig|93062.4.peg.1788rxn00469	0.465412		COMMON	fig|93062.4.peg.1788	rxn00469	fig|93062.4.peg.1788rxn00469	0.465412
COMMON	fig|93062.4.peg.1788	rxn01973	fig|93062.4.peg.1788rxn01973	0.115367		COMMON	fig|93062.4.peg.1788	rxn01973	fig|93062.4.peg.1788rxn01973	0.115367
COMMON	fig|93062.4.peg.2069	rxn05381	fig|93062.4.peg.2069rxn05381	0.780085		COMMON	fig|93062.4.peg.2069	rxn05381	fig|93062.4.peg.2069rxn05381	0.780085
COMMON	fig|93062.4.peg.2069	rxn05390	fig|93062.4.peg.2069rxn05390	0.780085		COMMON	fig|93062.4.peg.2069	rxn05390	fig|93062.4.peg.2069rxn05390	0.780085
COMMON	fig|93062.4.peg.2069	rxn05402	fig|93062.4.peg.2069rxn05402	0.780085		COMMON	fig|93062.4.peg.2069	rxn05402	fig|93062.4.peg.2069rxn05402	0.780085
COMMON	fig|93062.4.peg.2069	rxn05386	fig|93062.4.peg.2069rxn05386	0.780085		COMMON	fig|93062.4.peg.2069	rxn05386	fig|93062.4.peg.2069rxn05386	0.780085
COMMON	fig|93062.4.peg.2069	rxn05394	fig|93062.4.peg.2069rxn05394	0.780085		COMMON	fig|93062.4.peg.2069	rxn05394	fig|93062.4.peg.2069rxn05394	0.780085
COMMON	fig|93062.4.peg.2069	rxn05377	fig|93062.4.peg.2069rxn05377	0.780085		COMMON	fig|93062.4.peg.2069	rxn05377	fig|93062.4.peg.2069rxn05377	0.780085
COMMON	fig|93062.4.peg.2069	rxn05398	fig|93062.4.peg.2069rxn05398	0.780085		COMMON	fig|93062.4.peg.2069	rxn05398	fig|93062.4.peg.2069rxn05398	0.780085
COMMON	fig|93062.4.peg.2069	rxn05332	fig|93062.4.peg.2069rxn05332	0.780085		COMMON	fig|93062.4.peg.2069	rxn05332	fig|93062.4.peg.2069rxn05332	0.780085
COMMON	fig|93062.4.peg.2069	rxn05373	fig|93062.4.peg.2069rxn05373	0.780085		COMMON	fig|93062.4.peg.2069	rxn05373	fig|93062.4.peg.2069rxn05373	0.780085
COMMON	fig|93062.4.peg.2069	rxn05369	fig|93062.4.peg.2069rxn05369	0.780085		COMMON	fig|93062.4.peg.2069	rxn05369	fig|93062.4.peg.2069rxn05369	0.780085
COMMON	fig|93062.4.peg.2069	rxn05331	fig|93062.4.peg.2069rxn05331	0.780085		COMMON	fig|93062.4.peg.2069	rxn05331	fig|93062.4.peg.2069rxn05331	0.780085
COMMON	fig|93062.4.peg.2069	rxn05330	fig|93062.4.peg.2069rxn05330	0.780085		COMMON	fig|93062.4.peg.2069	rxn05330	fig|93062.4.peg.2069rxn05330	0.780085
COMMON	fig|93062.4.peg.2069	rxn05333	fig|93062.4.peg.2069rxn05333	0.780085		COMMON	fig|93062.4.peg.2069	rxn05333	fig|93062.4.peg.2069rxn05333	0.780085
COMMON	fig|93062.4.peg.2069	rxn05462	fig|93062.4.peg.2069rxn05462	0.780085		COMMON	fig|93062.4.peg.2069	rxn05462	fig|93062.4.peg.2069rxn05462	0.780085
COMMON	fig|93062.4.peg.2069	rxn05335	fig|93062.4.peg.2069rxn05335	0.780085		COMMON	fig|93062.4.peg.2069	rxn05335	fig|93062.4.peg.2069rxn05335	0.780085
COMMON	fig|93062.4.peg.2069	rxn05334	fig|93062.4.peg.2069rxn05334	0.780085		COMMON	fig|93062.4.peg.2069	rxn05334	fig|93062.4.peg.2069rxn05334	0.780085
COMMON	fig|93062.4.peg.2069	rxn05329	fig|93062.4.peg.2069rxn05329	0.780085		COMMON	fig|93062.4.peg.2069	rxn05329	fig|93062.4.peg.2069rxn05329	0.780085
COMMON	fig|93062.4.peg.2069	rxn05406	fig|93062.4.peg.2069rxn05406	0.780085		COMMON	fig|93062.4.peg.2069	rxn05406	fig|93062.4.peg.2069rxn05406	0.780085
COMMON	fig|93062.4.peg.2069	rxn05365	fig|93062.4.peg.2069rxn05365	0.780085		COMMON	fig|93062.4.peg.2069	rxn05365	fig|93062.4.peg.2069rxn05365	0.780085
COMMON	fig|93062.4.peg.2069	rxn05361	fig|93062.4.peg.2069rxn05361	0.780085		COMMON	fig|93062.4.peg.2069	rxn05361	fig|93062.4.peg.2069rxn05361	0.780085
COMMON	fig|93062.4.peg.2365	rxn02160	fig|93062.4.peg.2365rxn02160	0.143573		COMMON	fig|93062.4.peg.2365	rxn02160	fig|93062.4.peg.2365rxn02160	0.143573
COMMON	fig|93062.4.peg.904	rxn03150	fig|93062.4.peg.904rxn03150	0.493735		COMMON	fig|93062.4.peg.904	rxn03150	fig|93062.4.peg.904rxn03150	0.493735
COMMON	fig|93062.4.peg.1746	rxn04996	fig|93062.4.peg.1746rxn04996	0.0566823		COMMON	fig|93062.4.peg.1746	rxn04996	fig|93062.4.peg.1746rxn04996	0.0566823
COMMON	fig|93062.4.peg.1746	rxn04113	fig|93062.4.peg.1746rxn04113	0.0566823		COMMON	fig|93062.4.peg.1746	rxn04113	fig|93062.4.peg.1746rxn04113	0.0566823
COMMON	fig|93062.4.peg.1508	rxn00756	fig|93062.4.peg.1508rxn00756	0.00796072		COMMON	fig|93062.4.peg.1508	rxn00756	fig|93062.4.peg.1508rxn00756	0.00796072
COMMON	fig|93062.4.peg.1193	rxn02011	fig|93062.4.peg.1193rxn02011	0.892195		COMMON	fig|93062.4.peg.1193	rxn02011	fig|93062.4.peg.1193rxn02011	0.892195
COMMON	fig|99287.1.peg.4260	rxn01827	fig|99287.1.peg.4260rxn01827	0.0649404		COMMON	fig|99287.1.peg.4260	rxn01827	fig|99287.1.peg.4260rxn01827	0.0649404
COMMON	fig|99287.1.peg.2713	rxn05192	fig|99287.1.peg.2713rxn05192	0.318624		COMMON	fig|99287.1.peg.2713	rxn05192	fig|99287.1.peg.2713rxn05192	0.318624
COMMON	fig|99287.1.peg.3654	rxn01176	fig|99287.1.peg.3654rxn01176	0.0392346		COMMON	fig|99287.1.peg.3654	rxn01176	fig|99287.1.peg.3654rxn01176	0.0392346
COMMON	fig|99287.1.peg.4006	rxn09997	fig|99287.1.peg.4006rxn09997	0.743405		COMMON	fig|99287.1.peg.4006	rxn09997	fig|99287.1.peg.4006rxn09997	0.743405
COMMON	fig|99287.1.peg.3816	rxn09128	fig|99287.1.peg.3816rxn09128	0.983921		COMMON	fig|99287.1.peg.3816	rxn09128	fig|99287.1.peg.3816rxn09128	0.983921
COMMON	fig|99287.1.peg.3816	rxn09129	fig|99287.1.peg.3816rxn09129	0.983921		COMMON	fig|99287.1.peg.3816	rxn09129	fig|99287.1.peg.3816rxn09129	0.983921
COMMON	fig|99287.1.peg.3816	rxn09160	fig|99287.1.peg.3816rxn09160	0.983921		COMMON	fig|99287.1.peg.3816	rxn09160	fig|99287.1.peg.3816rxn09160	0.983921
COMMON	fig|99287.1.peg.3816	rxn09161	fig|99287.1.peg.3816rxn09161	0.983921		COMMON	fig|99287.1.peg.3816	rxn09161	fig|99287.1.peg.3816rxn09161	0.983921
COMMON	fig|99287.1.peg.3816	rxn09162	fig|99287.1.peg.3816rxn09162	0.983921		COMMON	fig|99287.1.peg.3816	rxn09162	fig|99287.1.peg.3816rxn09162	0.983921
COMMON	fig|99287.1.peg.3816	rxn09163	fig|99287.1.peg.3816rxn09163	0.983921		COMMON	fig|99287.1.peg.3816	rxn09163	fig|99287.1.peg.3816rxn09163	0.983921
COMMON	fig|99287.1.peg.3816	rxn09123	fig|99287.1.peg.3816rxn09123	0.983921		COMMON	fig|99287.1.peg.3816	rxn09123	fig|99287.1.peg.3816rxn09123	0.983921
COMMON	fig|99287.1.peg.3816	rxn09124	fig|99287.1.peg.3816rxn09124	0.983921		COMMON	fig|99287.1.peg.3816	rxn09124	fig|99287.1.peg.3816rxn09124	0.983921
COMMON	fig|99287.1.peg.3816	rxn09125	fig|99287.1.peg.3816rxn09125	0.983921		COMMON	fig|99287.1.peg.3816	rxn09125	fig|99287.1.peg.3816rxn09125	0.983921
COMMON	fig|99287.1.peg.3816	rxn09126	fig|99287.1.peg.3816rxn09126	0.983921		COMMON	fig|99287.1.peg.3816	rxn09126	fig|99287.1.peg.3816rxn09126	0.983921
COMMON	fig|99287.1.peg.3816	rxn09127	fig|99287.1.peg.3816rxn09127	0.983921		COMMON	fig|99287.1.peg.3816	rxn09127	fig|99287.1.peg.3816rxn09127	0.983921
COMMON	fig|99287.1.peg.3816	rxn09164	fig|99287.1.peg.3816rxn09164	0.983921		COMMON	fig|99287.1.peg.3816	rxn09164	fig|99287.1.peg.3816rxn09164	0.983921
COMMON	fig|99287.1.peg.3816	rxn09159	fig|99287.1.peg.3816rxn09159	0.983921		COMMON	fig|99287.1.peg.3816	rxn09159	fig|99287.1.peg.3816rxn09159	0.983921
COMMON	fig|99287.1.peg.3816	rxn09158	fig|99287.1.peg.3816rxn09158	0.983921		COMMON	fig|99287.1.peg.3816	rxn09158	fig|99287.1.peg.3816rxn09158	0.983921
COMMON	fig|99287.1.peg.3816	rxn09155	fig|99287.1.peg.3816rxn09155	0.983921		COMMON	fig|99287.1.peg.3816	rxn09155	fig|99287.1.peg.3816rxn09155	0.983921
COMMON	fig|99287.1.peg.3816	rxn09154	fig|99287.1.peg.3816rxn09154	0.983921		COMMON	fig|99287.1.peg.3816	rxn09154	fig|99287.1.peg.3816rxn09154	0.983921
COMMON	fig|99287.1.peg.3816	rxn09157	fig|99287.1.peg.3816rxn09157	0.983921		COMMON	fig|99287.1.peg.3816	rxn09157	fig|99287.1.peg.3816rxn09157	0.983921
COMMON	fig|99287.1.peg.3816	rxn09151	fig|99287.1.peg.3816rxn09151	0.983921		COMMON	fig|99287.1.peg.3816	rxn09151	fig|99287.1.peg.3816rxn09151	0.983921
COMMON	fig|99287.1.peg.3816	rxn09150	fig|99287.1.peg.3816rxn09150	0.983921		COMMON	fig|99287.1.peg.3816	rxn09150	fig|99287.1.peg.3816rxn09150	0.983921
COMMON	fig|99287.1.peg.3816	rxn09153	fig|99287.1.peg.3816rxn09153	0.983921		COMMON	fig|99287.1.peg.3816	rxn09153	fig|99287.1.peg.3816rxn09153	0.983921
COMMON	fig|99287.1.peg.3816	rxn09152	fig|99287.1.peg.3816rxn09152	0.983921		COMMON	fig|99287.1.peg.3816	rxn09152	fig|99287.1.peg.3816rxn09152	0.983921
COMMON	fig|99287.1.peg.3816	rxn09139	fig|99287.1.peg.3816rxn09139	0.983921		COMMON	fig|99287.1.peg.3816	rxn09139	fig|99287.1.peg.3816rxn09139	0.983921
COMMON	fig|99287.1.peg.3816	rxn09138	fig|99287.1.peg.3816rxn09138	0.983921		COMMON	fig|99287.1.peg.3816	rxn09138	fig|99287.1.peg.3816rxn09138	0.983921
COMMON	fig|99287.1.peg.3816	rxn09133	fig|99287.1.peg.3816rxn09133	0.983921		COMMON	fig|99287.1.peg.3816	rxn09133	fig|99287.1.peg.3816rxn09133	0.983921
COMMON	fig|99287.1.peg.3816	rxn09132	fig|99287.1.peg.3816rxn09132	0.983921		COMMON	fig|99287.1.peg.3816	rxn09132	fig|99287.1.peg.3816rxn09132	0.983921
COMMON	fig|99287.1.peg.3816	rxn09131	fig|99287.1.peg.3816rxn09131	0.983921		COMMON	fig|99287.1.peg.3816	rxn09131	fig|99287.1.peg.3816rxn09131	0.983921
COMMON	fig|99287.1.peg.3816	rxn09130	fig|99287.1.peg.3816rxn09130	0.983921		COMMON	fig|99287.1.peg.3816	rxn09130	fig|99287.1.peg.3816rxn09130	0.983921
COMMON	fig|99287.1.peg.3816	rxn09137	fig|99287.1.peg.3816rxn09137	0.983921		COMMON	fig|99287.1.peg.3816	rxn09137	fig|99287.1.peg.3816rxn09137	0.983921
COMMON	fig|99287.1.peg.3816	rxn09136	fig|99287.1.peg.3816rxn09136	0.983921		COMMON	fig|99287.1.peg.3816	rxn09136	fig|99287.1.peg.3816rxn09136	0.983921
COMMON	fig|99287.1.peg.3816	rxn09135	fig|99287.1.peg.3816rxn09135	0.983921		COMMON	fig|99287.1.peg.3816	rxn09135	fig|99287.1.peg.3816rxn09135	0.983921
COMMON	fig|99287.1.peg.3816	rxn09134	fig|99287.1.peg.3816rxn09134	0.983921		COMMON	fig|99287.1.peg.3816	rxn09134	fig|99287.1.peg.3816rxn09134	0.983921
COMMON	fig|99287.1.peg.3816	rxn09148	fig|99287.1.peg.3816rxn09148	0.983921		COMMON	fig|99287.1.peg.3816	rxn09148	fig|99287.1.peg.3816rxn09148	0.983921
COMMON	fig|99287.1.peg.3816	rxn09142	fig|99287.1.peg.3816rxn09142	0.983921		COMMON	fig|99287.1.peg.3816	rxn09142	fig|99287.1.peg.3816rxn09142	0.983921
COMMON	fig|99287.1.peg.3816	rxn09143	fig|99287.1.peg.3816rxn09143	0.983921		COMMON	fig|99287.1.peg.3816	rxn09143	fig|99287.1.peg.3816rxn09143	0.983921
COMMON	fig|99287.1.peg.3816	rxn09140	fig|99287.1.peg.3816rxn09140	0.983921		COMMON	fig|99287.1.peg.3816	rxn09140	fig|99287.1.peg.3816rxn09140	0.983921
COMMON	fig|99287.1.peg.3816	rxn09141	fig|99287.1.peg.3816rxn09141	0.983921		COMMON	fig|99287.1.peg.3816	rxn09141	fig|99287.1.peg.3816rxn09141	0.983921
COMMON	fig|99287.1.peg.3816	rxn09146	fig|99287.1.peg.3816rxn09146	0.983921		COMMON	fig|99287.1.peg.3816	rxn09146	fig|99287.1.peg.3816rxn09146	0.983921
COMMON	fig|99287.1.peg.3816	rxn09144	fig|99287.1.peg.3816rxn09144	0.983921		COMMON	fig|99287.1.peg.3816	rxn09144	fig|99287.1.peg.3816rxn09144	0.983921
COMMON	fig|99287.1.peg.3422	rxn03030	fig|99287.1.peg.3422rxn03030	0.0110595		COMMON	fig|99287.1.peg.3422	rxn03030	fig|99287.1.peg.3422rxn03030	0.0110595
COMMON	fig|99287.1.peg.3540	rxn00577	fig|99287.1.peg.3540rxn00577	0.000349426		COMMON	fig|99287.1.peg.3540	rxn00577	fig|99287.1.peg.3540rxn00577	0.000349426
COMMON	fig|99287.1.peg.1122	rxn00433	fig|99287.1.peg.1122rxn00433	0.49691		COMMON	fig|99287.1.peg.1122	rxn00433	fig|99287.1.peg.1122rxn00433	0.49691
COMMON	fig|99287.1.peg.2424	rxn00917	fig|99287.1.peg.2424rxn00917	0.890713		COMMON	fig|99287.1.peg.2424	rxn00917	fig|99287.1.peg.2424rxn00917	0.890713
COMMON	fig|99287.1.peg.65	rxn02929	fig|99287.1.peg.65rxn02929	0.435084		COMMON	fig|99287.1.peg.65	rxn02929	fig|99287.1.peg.65rxn02929	0.435084
COMMON	fig|99287.1.peg.2812	rxn03057	fig|99287.1.peg.2812rxn03057	0.00953528		COMMON	fig|99287.1.peg.2812	rxn03057	fig|99287.1.peg.2812rxn03057	0.00953528
COMMON	fig|99287.1.peg.2812	rxn05104	fig|99287.1.peg.2812rxn05104	0.220201		COMMON	fig|99287.1.peg.2812	rxn05104	fig|99287.1.peg.2812rxn05104	0.220201
COMMON	fig|99287.1.peg.3944	rxn08333	fig|99287.1.peg.3944rxn08333	0.555753		COMMON	fig|99287.1.peg.3944	rxn08333	fig|99287.1.peg.3944rxn08333	0.555753
COMMON	fig|99287.1.peg.225	rxn05381	fig|99287.1.peg.225rxn05381	0.710723		COMMON	fig|99287.1.peg.225	rxn05381	fig|99287.1.peg.225rxn05381	0.710723
COMMON	fig|99287.1.peg.225	rxn05390	fig|99287.1.peg.225rxn05390	0.710723		COMMON	fig|99287.1.peg.225	rxn05390	fig|99287.1.peg.225rxn05390	0.710723
COMMON	fig|99287.1.peg.225	rxn05402	fig|99287.1.peg.225rxn05402	0.710723		COMMON	fig|99287.1.peg.225	rxn05402	fig|99287.1.peg.225rxn05402	0.710723
COMMON	fig|99287.1.peg.225	rxn05386	fig|99287.1.peg.225rxn05386	0.710723		COMMON	fig|99287.1.peg.225	rxn05386	fig|99287.1.peg.225rxn05386	0.710723
COMMON	fig|99287.1.peg.225	rxn05394	fig|99287.1.peg.225rxn05394	0.710723		COMMON	fig|99287.1.peg.225	rxn05394	fig|99287.1.peg.225rxn05394	0.710723
COMMON	fig|99287.1.peg.225	rxn05377	fig|99287.1.peg.225rxn05377	0.710723		COMMON	fig|99287.1.peg.225	rxn05377	fig|99287.1.peg.225rxn05377	0.710723
COMMON	fig|99287.1.peg.225	rxn05398	fig|99287.1.peg.225rxn05398	0.710723		COMMON	fig|99287.1.peg.225	rxn05398	fig|99287.1.peg.225rxn05398	0.710723
COMMON	fig|99287.1.peg.225	rxn05373	fig|99287.1.peg.225rxn05373	0.710723		COMMON	fig|99287.1.peg.225	rxn05373	fig|99287.1.peg.225rxn05373	0.710723
COMMON	fig|99287.1.peg.225	rxn05369	fig|99287.1.peg.225rxn05369	0.710723		COMMON	fig|99287.1.peg.225	rxn05369	fig|99287.1.peg.225rxn05369	0.710723
COMMON	fig|99287.1.peg.225	rxn05462	fig|99287.1.peg.225rxn05462	0.710723		COMMON	fig|99287.1.peg.225	rxn05462	fig|99287.1.peg.225rxn05462	0.710723
COMMON	fig|99287.1.peg.225	rxn05406	fig|99287.1.peg.225rxn05406	0.710723		COMMON	fig|99287.1.peg.225	rxn05406	fig|99287.1.peg.225rxn05406	0.710723
COMMON	fig|99287.1.peg.225	rxn05365	fig|99287.1.peg.225rxn05365	0.710723		COMMON	fig|99287.1.peg.225	rxn05365	fig|99287.1.peg.225rxn05365	0.710723
COMMON	fig|99287.1.peg.225	rxn05361	fig|99287.1.peg.225rxn05361	0.710723		COMMON	fig|99287.1.peg.225	rxn05361	fig|99287.1.peg.225rxn05361	0.710723
COMMON	fig|99287.1.peg.1952	rxn03513	fig|99287.1.peg.1952rxn03513	0.981601		COMMON	fig|99287.1.peg.1952	rxn03513	fig|99287.1.peg.1952rxn03513	0.981601
COMMON	fig|99287.1.peg.1952	rxn04047	fig|99287.1.peg.1952rxn04047	0.981601		COMMON	fig|99287.1.peg.1952	rxn04047	fig|99287.1.peg.1952rxn04047	0.981601
COMMON	fig|99287.1.peg.1072	rxn01203	fig|99287.1.peg.1072rxn01203	0.558312		COMMON	fig|99287.1.peg.1072	rxn01203	fig|99287.1.peg.1072rxn01203	0.558312
COMMON	fig|99287.1.peg.1131	rxn03030	fig|99287.1.peg.1131rxn03030	0.00930534		COMMON	fig|99287.1.peg.1131	rxn03030	fig|99287.1.peg.1131rxn03030	0.00930534
COMMON	fig|99287.1.peg.3593	rxn08620	fig|99287.1.peg.3593rxn08620	0.149465		COMMON	fig|99287.1.peg.3593	rxn08620	fig|99287.1.peg.3593rxn08620	0.149465
COMMON	fig|99287.1.peg.3884	rxn01022	fig|99287.1.peg.3884rxn01022	0.390829		COMMON	fig|99287.1.peg.3884	rxn01022	fig|99287.1.peg.3884rxn01022	0.390829
COMMON	fig|99287.1.peg.4033	rxn01857	fig|99287.1.peg.4033rxn01857	0.238811		COMMON	fig|99287.1.peg.4033	rxn01857	fig|99287.1.peg.4033rxn01857	0.238811
COMMON	fig|99287.1.peg.2661	rxn03643	fig|99287.1.peg.2661rxn03643	0.637555		COMMON	fig|99287.1.peg.2661	rxn03643	fig|99287.1.peg.2661rxn03643	0.637555
COMMON	fig|99287.1.peg.475	rxn01022	fig|99287.1.peg.475rxn01022	0.343689		COMMON	fig|99287.1.peg.475	rxn01022	fig|99287.1.peg.475rxn01022	0.343689
COMMON	fig|99287.1.peg.1951	rxn03492	fig|99287.1.peg.1951rxn03492	0.963615		COMMON	fig|99287.1.peg.1951	rxn03492	fig|99287.1.peg.1951rxn03492	0.963615
COMMON	fig|99287.1.peg.1951	rxn04050	fig|99287.1.peg.1951rxn04050	0.963615		COMMON	fig|99287.1.peg.1951	rxn04050	fig|99287.1.peg.1951rxn04050	0.963615
COMMON	fig|99287.1.peg.512	rxn00375	fig|99287.1.peg.512rxn00375	0.00457523		COMMON	fig|99287.1.peg.512	rxn00375	fig|99287.1.peg.512rxn00375	0.00457523
COMMON	fig|99287.1.peg.1955	rxn03491	fig|99287.1.peg.1955rxn03491	0.92134		COMMON	fig|99287.1.peg.1955	rxn03491	fig|99287.1.peg.1955rxn03491	0.92134
COMMON	fig|99287.1.peg.2212	rxn01203	fig|99287.1.peg.2212rxn01203	0.509854		COMMON	fig|99287.1.peg.2212	rxn01203	fig|99287.1.peg.2212rxn01203	0.509854
COMMON	fig|99287.1.peg.1097	rxn00324	fig|99287.1.peg.1097rxn00324	0.429901		COMMON	fig|99287.1.peg.1097	rxn00324	fig|99287.1.peg.1097rxn00324	0.429901
COMMON	fig|99287.1.peg.1960	rxn06979	fig|99287.1.peg.1960rxn06979	0.991824		COMMON	fig|99287.1.peg.1960	rxn06979	fig|99287.1.peg.1960rxn06979	0.991824
COMMON	fig|99287.1.peg.1960	rxn11544	fig|99287.1.peg.1960rxn11544	0.991824		COMMON	fig|99287.1.peg.1960	rxn11544	fig|99287.1.peg.1960rxn11544	0.991824
COMMON	fig|99287.1.peg.3410	rxn01644	fig|99287.1.peg.3410rxn01644	0.0216644		COMMON	fig|99287.1.peg.3410	rxn01644	fig|99287.1.peg.3410rxn01644	0.0216644
COMMON	fig|99287.1.peg.2218	rxn03168	fig|99287.1.peg.2218rxn03168	0.0295765		COMMON	fig|99287.1.peg.2218	rxn03168	fig|99287.1.peg.2218rxn03168	0.0295765
COMMON	fig|99287.1.peg.630	rxn01122	fig|99287.1.peg.630rxn01122	0.696844		COMMON	fig|99287.1.peg.630	rxn01122	fig|99287.1.peg.630rxn01122	0.696844
COMMON	fig|99287.1.peg.3024	rxn03869	fig|99287.1.peg.3024rxn03869	0.0112119		COMMON	fig|99287.1.peg.3024	rxn03869	fig|99287.1.peg.3024rxn03869	0.0112119
COMMON	fig|99287.1.peg.3024	rxn02222	fig|99287.1.peg.3024rxn02222	0.0112119		COMMON	fig|99287.1.peg.3024	rxn02222	fig|99287.1.peg.3024rxn02222	0.0112119
COMMON	fig|99287.1.peg.3024	rxn03839	fig|99287.1.peg.3024rxn03839	0.0112119		COMMON	fig|99287.1.peg.3024	rxn03839	fig|99287.1.peg.3024rxn03839	0.0112119
COMMON	fig|99287.1.peg.3829	rxn03397	fig|99287.1.peg.3829rxn03397	0.827398		COMMON	fig|99287.1.peg.3829	rxn03397	fig|99287.1.peg.3829rxn03397	0.827398
COMMON	fig|99287.1.peg.3829	rxn10094	fig|99287.1.peg.3829rxn10094	0.827398		COMMON	fig|99287.1.peg.3829	rxn10094	fig|99287.1.peg.3829rxn10094	0.827398
COMMON	fig|99287.1.peg.1620	rxn05416	fig|99287.1.peg.1620rxn05416	0.413204		COMMON	fig|99287.1.peg.1620	rxn05416	fig|99287.1.peg.1620rxn05416	0.413204
COMMON	fig|99287.1.peg.1620	rxn05412	fig|99287.1.peg.1620rxn05412	0.413204		COMMON	fig|99287.1.peg.1620	rxn05412	fig|99287.1.peg.1620rxn05412	0.413204
COMMON	fig|99287.1.peg.1620	rxn05428	fig|99287.1.peg.1620rxn05428	0.413204		COMMON	fig|99287.1.peg.1620	rxn05428	fig|99287.1.peg.1620rxn05428	0.413204
COMMON	fig|99287.1.peg.1620	rxn05432	fig|99287.1.peg.1620rxn05432	0.413204		COMMON	fig|99287.1.peg.1620	rxn05432	fig|99287.1.peg.1620rxn05432	0.413204
COMMON	fig|99287.1.peg.1620	rxn05424	fig|99287.1.peg.1620rxn05424	0.413204		COMMON	fig|99287.1.peg.1620	rxn05424	fig|99287.1.peg.1620rxn05424	0.413204
COMMON	fig|99287.1.peg.1620	rxn05420	fig|99287.1.peg.1620rxn05420	0.413204		COMMON	fig|99287.1.peg.1620	rxn05420	fig|99287.1.peg.1620rxn05420	0.413204
COMMON	fig|99287.1.peg.3048	rxn05416	fig|99287.1.peg.3048rxn05416	0.347961		COMMON	fig|99287.1.peg.3048	rxn05416	fig|99287.1.peg.3048rxn05416	0.347961
COMMON	fig|99287.1.peg.3048	rxn05412	fig|99287.1.peg.3048rxn05412	0.347961		COMMON	fig|99287.1.peg.3048	rxn05412	fig|99287.1.peg.3048rxn05412	0.347961
COMMON	fig|99287.1.peg.3048	rxn05428	fig|99287.1.peg.3048rxn05428	0.347961		COMMON	fig|99287.1.peg.3048	rxn05428	fig|99287.1.peg.3048rxn05428	0.347961
COMMON	fig|99287.1.peg.3048	rxn05432	fig|99287.1.peg.3048rxn05432	0.347961		COMMON	fig|99287.1.peg.3048	rxn05432	fig|99287.1.peg.3048rxn05432	0.347961
COMMON	fig|99287.1.peg.3048	rxn05424	fig|99287.1.peg.3048rxn05424	0.347961		COMMON	fig|99287.1.peg.3048	rxn05424	fig|99287.1.peg.3048rxn05424	0.347961
COMMON	fig|99287.1.peg.3048	rxn05420	fig|99287.1.peg.3048rxn05420	0.347961		COMMON	fig|99287.1.peg.3048	rxn05420	fig|99287.1.peg.3048rxn05420	0.347961
COMMON	fig|99287.1.peg.1942	rxn03538	fig|99287.1.peg.1942rxn03538	0.818546		COMMON	fig|99287.1.peg.1942	rxn03538	fig|99287.1.peg.1942rxn03538	0.818546
COMMON	fig|99287.1.peg.1274	rxn00607	fig|99287.1.peg.1274rxn00607	0.112963		COMMON	fig|99287.1.peg.1274	rxn00607	fig|99287.1.peg.1274rxn00607	0.112963
COMMON	fig|99287.1.peg.2693	rxn00979	fig|99287.1.peg.2693rxn00979	0.0819418		COMMON	fig|99287.1.peg.2693	rxn00979	fig|99287.1.peg.2693rxn00979	0.0819418
COMMON	fig|99287.1.peg.216	rxn00119	fig|99287.1.peg.216rxn00119	0.952235		COMMON	fig|99287.1.peg.216	rxn00119	fig|99287.1.peg.216rxn00119	0.952235
COMMON	fig|99287.1.peg.1045	rxn00952	fig|99287.1.peg.1045rxn00952	0.254232		COMMON	fig|99287.1.peg.1045	rxn00952	fig|99287.1.peg.1045rxn00952	0.254232
COMMON	fig|99287.1.peg.1956	rxn03491	fig|99287.1.peg.1956rxn03491	0.93428		COMMON	fig|99287.1.peg.1956	rxn03491	fig|99287.1.peg.1956rxn03491	0.93428
COMMON	fig|99287.1.peg.3142	rxn00787	fig|99287.1.peg.3142rxn00787	0.282155		COMMON	fig|99287.1.peg.3142	rxn00787	fig|99287.1.peg.3142rxn00787	0.282155
COMMON	fig|99287.1.peg.2231	rxn11703	fig|99287.1.peg.2231rxn11703	0.952192		COMMON	fig|99287.1.peg.2231	rxn11703	fig|99287.1.peg.2231rxn11703	0.952192
COMMON	fig|99287.1.peg.1944	rxn03540	fig|99287.1.peg.1944rxn03540	0.81765		COMMON	fig|99287.1.peg.1944	rxn03540	fig|99287.1.peg.1944rxn03540	0.81765
NON_PROBANNO_ONLY	fig|158879.1.peg.1352	rxn04996	fig|158879.1.peg.1352rxn04996	0.05682		PROBANNO_ONLY	fig|158879.1.peg.584	rxn02144	fig|158879.1.peg.584rxn02144	0.33141		Organism	Mean NP ONLY	Mean PA Only
NON_PROBANNO_ONLY	fig|169963.1.peg.663	rxn01109	fig|169963.1.peg.663rxn01109	0.129292		PROBANNO_ONLY	fig|158879.1.peg.584	rxn02483	fig|158879.1.peg.584rxn02483	0.0122827		158879	0.05682	0.409451
NON_PROBANNO_ONLY	fig|169963.1.peg.1236	rxn08783	fig|169963.1.peg.1236rxn08783	0.00151532		PROBANNO_ONLY	fig|158879.1.peg.166	rxn05517	fig|158879.1.peg.166rxn05517	0.757489		169963	0.0718604	0.600199
NON_PROBANNO_ONLY	fig|169963.1.peg.484	rxn00568	fig|169963.1.peg.484rxn00568	0.00841561		PROBANNO_ONLY	fig|158879.1.peg.438	rxn00076	fig|158879.1.peg.438rxn00076	0.0278143		171101	X	0.645996
NON_PROBANNO_ONLY	fig|169963.1.peg.2166	rxn01109	fig|169963.1.peg.2166rxn01109	0.148219		PROBANNO_ONLY	fig|158879.1.peg.2015	rxn05517	fig|158879.1.peg.2015rxn05517	0.768603		208964	0.129155	0.719524
NON_PROBANNO_ONLY	fig|208964.1.peg.3128	rxn01109	fig|208964.1.peg.3128rxn01109	0.230875		PROBANNO_ONLY	fig|158879.1.peg.1352	rxn08756	fig|158879.1.peg.1352rxn08756	0.05682		224308	0.00241687	0.60839
NON_PROBANNO_ONLY	fig|208964.1.peg.4162	rxn02222	fig|208964.1.peg.4162rxn02222	0.0352636		PROBANNO_ONLY	fig|158879.1.peg.1352	rxn08352	fig|158879.1.peg.1352rxn08352	0.05682		243273	X	0.321672
NON_PROBANNO_ONLY	fig|208964.1.peg.1296	rxn00605	fig|208964.1.peg.1296rxn00605	0.00460576		PROBANNO_ONLY	fig|158879.1.peg.994	rxn00250	fig|158879.1.peg.994rxn00250	0.803357		243277	0.0254279	0.599852
NON_PROBANNO_ONLY	fig|208964.1.peg.1294	rxn01107	fig|208964.1.peg.1294rxn01107	0.245875		PROBANNO_ONLY	fig|158879.1.peg.232	rxn00990	fig|158879.1.peg.232rxn00990	0.870458		266834	0.0529232	0.560523
NON_PROBANNO_ONLY	fig|224308.1.peg.305	rxn01134	fig|224308.1.peg.305rxn01134	0.00159422		PROBANNO_ONLY	fig|169963.1.peg.1186	rxn07587	fig|169963.1.peg.1186rxn07587	0.990185		267608	0.0729497	0.369093
NON_PROBANNO_ONLY	fig|224308.1.peg.433	rxn00105	fig|224308.1.peg.433rxn00105	0.00358362		PROBANNO_ONLY	fig|169963.1.peg.1064	rxn00250	fig|169963.1.peg.1064rxn00250	0.803357		269483	0.14256	0.695543
NON_PROBANNO_ONLY	fig|224308.1.peg.3960	rxn00605	fig|224308.1.peg.3960rxn00605	0.00207278		PROBANNO_ONLY	fig|169963.1.peg.1184	rxn05054	fig|169963.1.peg.1184rxn05054	0.800538		272626	0.125023	0.620418
NON_PROBANNO_ONLY	fig|243277.1.peg.3641	rxn03541	fig|243277.1.peg.3641rxn03541	0.0130306		PROBANNO_ONLY	fig|169963.1.peg.1184	rxn04384	fig|169963.1.peg.1184rxn04384	0.800538		272635	0.311206	0.149948
NON_PROBANNO_ONLY	fig|243277.1.peg.359	rxn00569	fig|243277.1.peg.359rxn00569	0.0523362		PROBANNO_ONLY	fig|169963.1.peg.1655	rxn00416	fig|169963.1.peg.1655rxn00416	0.828123		316407	0.000857988	0.58608
NON_PROBANNO_ONLY	fig|243277.1.peg.1034	rxn11650	fig|243277.1.peg.1034rxn11650	0.136088		PROBANNO_ONLY	fig|169963.1.peg.420	rxn05160	fig|169963.1.peg.420rxn05160	0.849475		345074	0.0523362	0.70378
NON_PROBANNO_ONLY	fig|243277.1.peg.3038	rxn05464	fig|243277.1.peg.3038rxn05464	0.0140487		PROBANNO_ONLY	fig|169963.1.peg.480	rxn11650	fig|169963.1.peg.480rxn11650	0.382249		401614	0.169148	0.699114
NON_PROBANNO_ONLY	fig|243277.1.peg.3038	rxn05322	fig|243277.1.peg.3038rxn05322	0.0140487		PROBANNO_ONLY	fig|169963.1.peg.663	rxn01108	fig|169963.1.peg.663rxn01108	0.129292		62977.3	0.085141	0.376898
NON_PROBANNO_ONLY	fig|243277.1.peg.3038	rxn05440	fig|243277.1.peg.3038rxn05440	0.0140487		PROBANNO_ONLY	fig|169963.1.peg.820	rxn05313	fig|169963.1.peg.820rxn05313	0.923943		71421.1	0.432074	0.534629
NON_PROBANNO_ONLY	fig|243277.1.peg.3038	rxn05444	fig|243277.1.peg.3038rxn05444	0.0140487		PROBANNO_ONLY	fig|169963.1.peg.1236	rxn00500	fig|169963.1.peg.1236rxn00500	0.00151532		83332.1	0.000872658	0.607511
NON_PROBANNO_ONLY	fig|243277.1.peg.3038	rxn05438	fig|243277.1.peg.3038rxn05438	0.0140487		PROBANNO_ONLY	fig|169963.1.peg.1960	rxn00328	fig|169963.1.peg.1960rxn00328	0.737573		83333.1	0.000857988	0.563761
NON_PROBANNO_ONLY	fig|243277.1.peg.3038	rxn05328	fig|243277.1.peg.3038rxn05328	0.0140487		PROBANNO_ONLY	fig|169963.1.peg.169	rxn05160	fig|169963.1.peg.169rxn05160	0.914168		85962.1	X	0.664711
NON_PROBANNO_ONLY	fig|243277.1.peg.3038	rxn05326	fig|243277.1.peg.3038rxn05326	0.0140487		PROBANNO_ONLY	fig|169963.1.peg.2166	rxn01108	fig|169963.1.peg.2166rxn01108	0.148219		93062.4	0.00614452	0.483345
NON_PROBANNO_ONLY	fig|243277.1.peg.3038	rxn05324	fig|243277.1.peg.3038rxn05324	0.0140487		PROBANNO_ONLY	fig|169963.1.peg.160	rxn01522	fig|169963.1.peg.160rxn01522	0.00796894		99287.1	X	0.825235
NON_PROBANNO_ONLY	fig|243277.1.peg.3038	rxn05325	fig|243277.1.peg.3038rxn05325	0.0140487		PROBANNO_ONLY	fig|169963.1.peg.174	rxn05160	fig|169963.1.peg.174rxn05160	0.884974
NON_PROBANNO_ONLY	fig|243277.1.peg.3038	rxn05436	fig|243277.1.peg.3038rxn05436	0.0140487		PROBANNO_ONLY	fig|169963.1.peg.2226	rxn00569	fig|169963.1.peg.2226rxn00569	0.0277883
NON_PROBANNO_ONLY	fig|243277.1.peg.3038	rxn05435	fig|243277.1.peg.3038rxn05435	0.0140487		PROBANNO_ONLY	fig|169963.1.peg.1190	rxn07586	fig|169963.1.peg.1190rxn07586	0.973475
NON_PROBANNO_ONLY	fig|266834.1.peg.4343	rxn01109	fig|266834.1.peg.4343rxn01109	0.173798		PROBANNO_ONLY	fig|171101.1.peg.1287	rxn00693	fig|171101.1.peg.1287rxn00693	0.0969058
NON_PROBANNO_ONLY	fig|266834.1.peg.2402	rxn00105	fig|266834.1.peg.2402rxn00105	0.0171226		PROBANNO_ONLY	fig|171101.1.peg.2279	rxn00119	fig|171101.1.peg.2279rxn00119	0.980837
NON_PROBANNO_ONLY	fig|266834.1.peg.6121	rxn08126	fig|266834.1.peg.6121rxn08126	0.0207508		PROBANNO_ONLY	fig|171101.1.peg.1568	rxn01501	fig|171101.1.peg.1568rxn01501	0.981667
NON_PROBANNO_ONLY	fig|266834.1.peg.6121	rxn00577	fig|266834.1.peg.6121rxn00577	2.1133e-05		PROBANNO_ONLY	fig|171101.1.peg.1864	rxn01484	fig|171101.1.peg.1864rxn01484	0.897513
NON_PROBANNO_ONLY	fig|267608.1.peg.5151	rxn02227	fig|267608.1.peg.5151rxn02227	0.00471261		PROBANNO_ONLY	fig|171101.1.peg.627	rxn00333	fig|171101.1.peg.627rxn00333	0.0434961
NON_PROBANNO_ONLY	fig|267608.1.peg.1083	rxn01171	fig|267608.1.peg.1083rxn01171	0.141187		PROBANNO_ONLY	fig|171101.1.peg.2109	rxn00748	fig|171101.1.peg.2109rxn00748	0.584594
NON_PROBANNO_ONLY	fig|269483.3.peg.6003	rxn01951	fig|269483.3.peg.6003rxn01951	0.00811218		PROBANNO_ONLY	fig|171101.1.peg.285	rxn00205	fig|171101.1.peg.285rxn00205	0.936954
NON_PROBANNO_ONLY	fig|269483.3.peg.2381	rxn02222	fig|269483.3.peg.2381rxn02222	0.277008		PROBANNO_ONLY	fig|208964.1.peg.2261	rxn01123	fig|208964.1.peg.2261rxn01123	0.479835
NON_PROBANNO_ONLY	fig|272626.1.peg.670	rxn01108	fig|272626.1.peg.670rxn01108	0.11616		PROBANNO_ONLY	fig|208964.1.peg.3043	rxn01352	fig|208964.1.peg.3043rxn01352	0.944629
NON_PROBANNO_ONLY	fig|272626.1.peg.2263	rxn01108	fig|272626.1.peg.2263rxn01108	0.141664		PROBANNO_ONLY	fig|208964.1.peg.2908	rxn07587	fig|208964.1.peg.2908rxn07587	0.992246
NON_PROBANNO_ONLY	fig|272626.1.peg.1931	rxn01108	fig|272626.1.peg.1931rxn01108	0.117244		PROBANNO_ONLY	fig|208964.1.peg.422	rxn00479	fig|208964.1.peg.422rxn00479	0.484907
NON_PROBANNO_ONLY	fig|272635.1.peg.35	rxn11703	fig|272635.1.peg.35rxn11703	0.311206		PROBANNO_ONLY	fig|208964.1.peg.2903	rxn07586	fig|208964.1.peg.2903rxn07586	0.524763
NON_PROBANNO_ONLY	fig|316407.3.peg.108	rxn05054	fig|316407.3.peg.108rxn05054	0.000857988		PROBANNO_ONLY	fig|208964.1.peg.1125	rxn01352	fig|208964.1.peg.1125rxn01352	0.890762
NON_PROBANNO_ONLY	fig|345073.6.peg.3239	rxn00569	fig|345073.6.peg.3239rxn00569	0.0523362		PROBANNO_ONLY	fig|224308.1.peg.3224	rxn09687	fig|224308.1.peg.3224rxn09687	0.901472
NON_PROBANNO_ONLY	fig|401614.5.peg.641	rxn08656	fig|401614.5.peg.641rxn08656	0.302029		PROBANNO_ONLY	fig|224308.1.peg.433	rxn00076	fig|224308.1.peg.433rxn00076	0.0038764
NON_PROBANNO_ONLY	fig|401614.5.peg.819	rxn01630	fig|401614.5.peg.819rxn01630	0.0362662		PROBANNO_ONLY	fig|224308.1.peg.3057	rxn00416	fig|224308.1.peg.3057rxn00416	0.833036
NON_PROBANNO_ONLY	fig|62977.3.peg.1996	rxn01453	fig|62977.3.peg.1996rxn01453	0.085141		PROBANNO_ONLY	fig|224308.1.peg.2879	rxn00762	fig|224308.1.peg.2879rxn00762	0.144872
NON_PROBANNO_ONLY	fig|71421.1.peg.272	rxn05528	fig|71421.1.peg.272rxn05528	0.86356		PROBANNO_ONLY	fig|224308.1.peg.1361	rxn05105	fig|224308.1.peg.1361rxn05105	0.556051
NON_PROBANNO_ONLY	fig|71421.1.peg.1511	rxn00190	fig|71421.1.peg.1511rxn00190	0.000588133		PROBANNO_ONLY	fig|224308.1.peg.3946	rxn09687	fig|224308.1.peg.3946rxn09687	0.917083
NON_PROBANNO_ONLY	fig|83332.1.peg.375	rxn01298	fig|83332.1.peg.375rxn01298	0.000872658		PROBANNO_ONLY	fig|224308.1.peg.1362	rxn05106	fig|224308.1.peg.1362rxn05106	0.51836
NON_PROBANNO_ONLY	fig|83333.1.peg.111	rxn05054	fig|83333.1.peg.111rxn05054	0.000857988		PROBANNO_ONLY	fig|224308.1.peg.3241	rxn10770	fig|224308.1.peg.3241rxn10770	0.178627
NON_PROBANNO_ONLY	fig|93062.4.peg.681	rxn00290	fig|93062.4.peg.681rxn00290	0.0110362		PROBANNO_ONLY	fig|224308.1.peg.3950	rxn05551	fig|224308.1.peg.3950rxn05551	0.856351
NON_PROBANNO_ONLY	fig|93062.4.peg.1453	rxn00605	fig|93062.4.peg.1453rxn00605	0.00125282		PROBANNO_ONLY	fig|224308.1.peg.1079	rxn00416	fig|224308.1.peg.1079rxn00416	0.882588
						PROBANNO_ONLY	fig|224308.1.peg.3907	rxn09687	fig|224308.1.peg.3907rxn09687	0.899972
						PROBANNO_ONLY	fig|243273.1.peg.311	rxn05177	fig|243273.1.peg.311rxn05177	0.00560969
						PROBANNO_ONLY	fig|243273.1.peg.406	rxn05177	fig|243273.1.peg.406rxn05177	0.00750057
						PROBANNO_ONLY	fig|243273.1.peg.474	rxn01352	fig|243273.1.peg.474rxn01352	0.951907
						PROBANNO_ONLY	fig|243277.1.peg.2323	rxn05200	fig|243277.1.peg.2323rxn05200	0.899698
						PROBANNO_ONLY	fig|243277.1.peg.758	rxn00917	fig|243277.1.peg.758rxn00917	0.890441
						PROBANNO_ONLY	fig|243277.1.peg.2521	rxn05517	fig|243277.1.peg.2521rxn05517	0.754623
						PROBANNO_ONLY	fig|243277.1.peg.2980	rxn02321	fig|243277.1.peg.2980rxn02321	0.031734
						PROBANNO_ONLY	fig|243277.1.peg.2920	rxn05200	fig|243277.1.peg.2920rxn05200	0.871222
						PROBANNO_ONLY	fig|243277.1.peg.3038	rxn01108	fig|243277.1.peg.3038rxn01108	0.209295
						PROBANNO_ONLY	fig|243277.1.peg.4407	rxn05200	fig|243277.1.peg.4407rxn05200	0.905807
						PROBANNO_ONLY	fig|243277.1.peg.2351	rxn05054	fig|243277.1.peg.2351rxn05054	0.474928
						PROBANNO_ONLY	fig|243277.1.peg.359	rxn00568	fig|243277.1.peg.359rxn00568	0.0523362
						PROBANNO_ONLY	fig|243277.1.peg.1330	rxn01825	fig|243277.1.peg.1330rxn01825	0.965593
						PROBANNO_ONLY	fig|243277.1.peg.1331	rxn00993	fig|243277.1.peg.1331rxn00993	0.542699
						PROBANNO_ONLY	fig|266834.1.peg.1522	rxn00076	fig|266834.1.peg.1522rxn00076	0.983676
						PROBANNO_ONLY	fig|266834.1.peg.4249	rxn00975	fig|266834.1.peg.4249rxn00975	0.00411546
						PROBANNO_ONLY	fig|266834.1.peg.2816	rxn01352	fig|266834.1.peg.2816rxn01352	0.991772
						PROBANNO_ONLY	fig|266834.1.peg.3503	rxn01580	fig|266834.1.peg.3503rxn01580	0.649252
						PROBANNO_ONLY	fig|266834.1.peg.4343	rxn01108	fig|266834.1.peg.4343rxn01108	0.173798
						PROBANNO_ONLY	fig|267608.1.peg.4560	rxn00173	fig|267608.1.peg.4560rxn00173	0.0013374
						PROBANNO_ONLY	fig|267608.1.peg.5151	rxn02226	fig|267608.1.peg.5151rxn02226	0.00471261
						PROBANNO_ONLY	fig|267608.1.peg.4059	rxn07586	fig|267608.1.peg.4059rxn07586	0.95318
						PROBANNO_ONLY	fig|267608.1.peg.4062	rxn07587	fig|267608.1.peg.4062rxn07587	0.984841
						PROBANNO_ONLY	fig|267608.1.peg.3405	rxn01580	fig|267608.1.peg.3405rxn01580	0.268979
						PROBANNO_ONLY	fig|267608.1.peg.2043	rxn00173	fig|267608.1.peg.2043rxn00173	0.00151054
						PROBANNO_ONLY	fig|269483.3.peg.2187	rxn10181	fig|269483.3.peg.2187rxn10181	0.722944
						PROBANNO_ONLY	fig|269483.3.peg.3921	rxn05200	fig|269483.3.peg.3921rxn05200	0.858891
						PROBANNO_ONLY	fig|269483.3.peg.3921	rxn05317	fig|269483.3.peg.3921rxn05317	0.858891
						PROBANNO_ONLY	fig|269483.3.peg.6494	rxn07586	fig|269483.3.peg.6494rxn07586	0.669772
						PROBANNO_ONLY	fig|269483.3.peg.7141	rxn00897	fig|269483.3.peg.7141rxn00897	0.074443
						PROBANNO_ONLY	fig|269483.3.peg.6520	rxn07587	fig|269483.3.peg.6520rxn07587	0.992553
						PROBANNO_ONLY	fig|269483.3.peg.3991	rxn00479	fig|269483.3.peg.3991rxn00479	0.691307
						PROBANNO_ONLY	fig|272626.1.peg.484	rxn11650	fig|272626.1.peg.484rxn11650	0.412208
						PROBANNO_ONLY	fig|272626.1.peg.817	rxn05313	fig|272626.1.peg.817rxn05313	0.870905
						PROBANNO_ONLY	fig|272626.1.peg.210	rxn05160	fig|272626.1.peg.210rxn05160	0.914571
						PROBANNO_ONLY	fig|272626.1.peg.213	rxn05160	fig|272626.1.peg.213rxn05160	0.889392
						PROBANNO_ONLY	fig|272626.1.peg.2184	rxn04082	fig|272626.1.peg.2184rxn04082	0.302936
						PROBANNO_ONLY	fig|272626.1.peg.818	rxn05313	fig|272626.1.peg.818rxn05313	0.927202
						PROBANNO_ONLY	fig|272626.1.peg.2263	rxn01109	fig|272626.1.peg.2263rxn01109	0.141664
						PROBANNO_ONLY	fig|272626.1.peg.442	rxn05160	fig|272626.1.peg.442rxn05160	0.8482
						PROBANNO_ONLY	fig|272626.1.peg.670	rxn01109	fig|272626.1.peg.670rxn01109	0.11616
						PROBANNO_ONLY	fig|272626.1.peg.1147	rxn07587	fig|272626.1.peg.1147rxn07587	0.990079
						PROBANNO_ONLY	fig|272626.1.peg.1151	rxn07586	fig|272626.1.peg.1151rxn07586	0.977145
						PROBANNO_ONLY	fig|272626.1.peg.1145	rxn05054	fig|272626.1.peg.1145rxn05054	0.804362
						PROBANNO_ONLY	fig|272626.1.peg.1145	rxn04384	fig|272626.1.peg.1145rxn04384	0.804362
						PROBANNO_ONLY	fig|272626.1.peg.1931	rxn01109	fig|272626.1.peg.1931rxn01109	0.117244
						PROBANNO_ONLY	fig|272626.1.peg.201	rxn01522	fig|272626.1.peg.201rxn01522	0.00689557
						PROBANNO_ONLY	fig|272626.1.peg.1050	rxn00250	fig|272626.1.peg.1050rxn00250	0.803357
						PROBANNO_ONLY	fig|272635.1.peg.626	rxn05177	fig|272635.1.peg.626rxn05177	0.0040023
						PROBANNO_ONLY	fig|272635.1.peg.64	rxn05177	fig|272635.1.peg.64rxn05177	0.00351618
						PROBANNO_ONLY	fig|272635.1.peg.632	rxn01134	fig|272635.1.peg.632rxn01134	0.442327
						PROBANNO_ONLY	fig|316407.3.peg.3770	rxn01111	fig|316407.3.peg.3770rxn01111	0.666742
						PROBANNO_ONLY	fig|316407.3.peg.2769	rxn01626	fig|316407.3.peg.2769rxn01626	0.701432
						PROBANNO_ONLY	fig|316407.3.peg.719	rxn05517	fig|316407.3.peg.719rxn05517	0.753176
						PROBANNO_ONLY	fig|316407.3.peg.500	rxn00654	fig|316407.3.peg.500rxn00654	0.22297
						PROBANNO_ONLY	fig|345073.6.peg.836	rxn05200	fig|345073.6.peg.836rxn05200	0.870946
						PROBANNO_ONLY	fig|345073.6.peg.1121	rxn00917	fig|345073.6.peg.1121rxn00917	0.890441
						PROBANNO_ONLY	fig|345073.6.peg.3239	rxn00568	fig|345073.6.peg.3239rxn00568	0.0523362
						PROBANNO_ONLY	fig|345073.6.peg.1697	rxn00993	fig|345073.6.peg.1697rxn00993	0.542582
						PROBANNO_ONLY	fig|345073.6.peg.1696	rxn01825	fig|345073.6.peg.1696rxn01825	0.965491
						PROBANNO_ONLY	fig|345073.6.peg.2772	rxn01111	fig|345073.6.peg.2772rxn01111	0.682123
						PROBANNO_ONLY	fig|345073.6.peg.2198	rxn05200	fig|345073.6.peg.2198rxn05200	0.905807
						PROBANNO_ONLY	fig|345073.6.peg.2563	rxn05054	fig|345073.6.peg.2563rxn05054	0.474928
						PROBANNO_ONLY	fig|345073.6.peg.2714	rxn05517	fig|345073.6.peg.2714rxn05517	0.753449
						PROBANNO_ONLY	fig|345073.6.peg.2541	rxn05200	fig|345073.6.peg.2541rxn05200	0.899698
						PROBANNO_ONLY	fig|401614.5.peg.641	rxn00333	fig|401614.5.peg.641rxn00333	0.302029
						PROBANNO_ONLY	fig|401614.5.peg.1039	rxn00589	fig|401614.5.peg.1039rxn00589	0.717212
						PROBANNO_ONLY	fig|401614.5.peg.1058	rxn02270	fig|401614.5.peg.1058rxn02270	0.598213
						PROBANNO_ONLY	fig|401614.5.peg.271	rxn10131	fig|401614.5.peg.271rxn10131	0.897221
						PROBANNO_ONLY	fig|401614.5.peg.272	rxn10131	fig|401614.5.peg.272rxn10131	0.980897
						PROBANNO_ONLY	fig|62977.3.peg.348	rxn00717	fig|62977.3.peg.348rxn00717	0.230684
						PROBANNO_ONLY	fig|62977.3.peg.1368	rxn01108	fig|62977.3.peg.1368rxn01108	0.101351
						PROBANNO_ONLY	fig|62977.3.peg.1619	rxn02168	fig|62977.3.peg.1619rxn02168	0.334413
						PROBANNO_ONLY	fig|62977.3.peg.2568	rxn01107	fig|62977.3.peg.2568rxn01107	0.841146
						PROBANNO_ONLY	fig|71421.1.peg.672	rxn03167	fig|71421.1.peg.672rxn03167	0.235289
						PROBANNO_ONLY	fig|71421.1.peg.978	rxn01068	fig|71421.1.peg.978rxn01068	0.193256
						PROBANNO_ONLY	fig|71421.1.peg.1511	rxn00138	fig|71421.1.peg.1511rxn00138	0.000588133
						PROBANNO_ONLY	fig|71421.1.peg.406	rxn00076	fig|71421.1.peg.406rxn00076	0.984546
						PROBANNO_ONLY	fig|71421.1.peg.1463	rxn08291	fig|71421.1.peg.1463rxn08291	0.000939295
						PROBANNO_ONLY	fig|71421.1.peg.272	rxn10481	fig|71421.1.peg.272rxn10481	0.86356
						PROBANNO_ONLY	fig|71421.1.peg.490	rxn05200	fig|71421.1.peg.490rxn05200	0.903671
[truncated: 43 more rows]

## Sheet: targeted-genes
Network-based genes			SEARCHKEY			Likelihood-based genes
COMMON	fig|158879.1.peg.1968	rxn05406	fig|158879.1.peg.1968rxn05406	0.780085		COMMON	fig|158879.1.peg.1968	rxn05406	fig|158879.1.peg.1968rxn05406	0.780085
COMMON	fig|158879.1.peg.1968	rxn05390	fig|158879.1.peg.1968rxn05390	0.780085		COMMON	fig|158879.1.peg.1968	rxn05390	fig|158879.1.peg.1968rxn05390	0.780085
COMMON	fig|158879.1.peg.1968	rxn05402	fig|158879.1.peg.1968rxn05402	0.780085		COMMON	fig|158879.1.peg.1968	rxn05402	fig|158879.1.peg.1968rxn05402	0.780085
COMMON	fig|158879.1.peg.1968	rxn05386	fig|158879.1.peg.1968rxn05386	0.780085		COMMON	fig|158879.1.peg.1968	rxn05386	fig|158879.1.peg.1968rxn05386	0.780085
COMMON	fig|158879.1.peg.1968	rxn05394	fig|158879.1.peg.1968rxn05394	0.780085		COMMON	fig|158879.1.peg.1968	rxn05394	fig|158879.1.peg.1968rxn05394	0.780085
COMMON	fig|158879.1.peg.1968	rxn05377	fig|158879.1.peg.1968rxn05377	0.780085		COMMON	fig|158879.1.peg.1968	rxn05377	fig|158879.1.peg.1968rxn05377	0.780085
COMMON	fig|158879.1.peg.1968	rxn05398	fig|158879.1.peg.1968rxn05398	0.780085		COMMON	fig|158879.1.peg.1968	rxn05398	fig|158879.1.peg.1968rxn05398	0.780085
COMMON	fig|158879.1.peg.1968	rxn05381	fig|158879.1.peg.1968rxn05381	0.780085		COMMON	fig|158879.1.peg.1968	rxn05381	fig|158879.1.peg.1968rxn05381	0.780085
COMMON	fig|158879.1.peg.1968	rxn05373	fig|158879.1.peg.1968rxn05373	0.780085		COMMON	fig|158879.1.peg.1968	rxn05373	fig|158879.1.peg.1968rxn05373	0.780085
COMMON	fig|158879.1.peg.1968	rxn05369	fig|158879.1.peg.1968rxn05369	0.780085		COMMON	fig|158879.1.peg.1968	rxn05369	fig|158879.1.peg.1968rxn05369	0.780085
COMMON	fig|158879.1.peg.1968	rxn05462	fig|158879.1.peg.1968rxn05462	0.780085		COMMON	fig|158879.1.peg.1968	rxn05462	fig|158879.1.peg.1968rxn05462	0.780085
COMMON	fig|158879.1.peg.1968	rxn05365	fig|158879.1.peg.1968rxn05365	0.780085		COMMON	fig|158879.1.peg.1968	rxn05365	fig|158879.1.peg.1968rxn05365	0.780085
COMMON	fig|158879.1.peg.1968	rxn05361	fig|158879.1.peg.1968rxn05361	0.780085		COMMON	fig|158879.1.peg.1968	rxn05361	fig|158879.1.peg.1968rxn05361	0.780085
COMMON	fig|158879.1.peg.251	rxn10291	fig|158879.1.peg.251rxn10291	0.527666		COMMON	fig|158879.1.peg.251	rxn10291	fig|158879.1.peg.251rxn10291	0.527666
COMMON	fig|158879.1.peg.251	rxn10292	fig|158879.1.peg.251rxn10292	0.527666		COMMON	fig|158879.1.peg.251	rxn10292	fig|158879.1.peg.251rxn10292	0.527666
COMMON	fig|158879.1.peg.251	rxn10293	fig|158879.1.peg.251rxn10293	0.527666		COMMON	fig|158879.1.peg.251	rxn10293	fig|158879.1.peg.251rxn10293	0.527666
COMMON	fig|158879.1.peg.2418	rxn01501	fig|158879.1.peg.2418rxn01501	0.942265		COMMON	fig|158879.1.peg.2418	rxn01501	fig|158879.1.peg.2418rxn01501	0.942265
COMMON	fig|158879.1.peg.255	rxn10197	fig|158879.1.peg.255rxn10197	0.028386		COMMON	fig|158879.1.peg.255	rxn10197	fig|158879.1.peg.255rxn10197	0.028386
COMMON	fig|158879.1.peg.1270	rxn01644	fig|158879.1.peg.1270rxn01644	0.0282913		COMMON	fig|158879.1.peg.1270	rxn01644	fig|158879.1.peg.1270rxn01644	0.0282913
COMMON	fig|158879.1.peg.1270	rxn02988	fig|158879.1.peg.1270rxn02988	0.02636		COMMON	fig|158879.1.peg.1270	rxn02988	fig|158879.1.peg.1270rxn02988	0.02636
COMMON	fig|158879.1.peg.1271	rxn02929	fig|158879.1.peg.1271rxn02929	0.274764		COMMON	fig|158879.1.peg.1271	rxn02929	fig|158879.1.peg.1271rxn02929	0.274764
COMMON	fig|158879.1.peg.371	rxn03150	fig|158879.1.peg.371rxn03150	0.474335		COMMON	fig|158879.1.peg.371	rxn03150	fig|158879.1.peg.371rxn03150	0.474335
COMMON	fig|158879.1.peg.1293	rxn09106	fig|158879.1.peg.1293rxn09106	0.493174		COMMON	fig|158879.1.peg.1293	rxn09106	fig|158879.1.peg.1293rxn09106	0.493174
COMMON	fig|158879.1.peg.1293	rxn10265	fig|158879.1.peg.1293rxn10265	0.493174		COMMON	fig|158879.1.peg.1293	rxn10265	fig|158879.1.peg.1293rxn10265	0.493174
COMMON	fig|158879.1.peg.1293	rxn10266	fig|158879.1.peg.1293rxn10266	0.493174		COMMON	fig|158879.1.peg.1293	rxn10266	fig|158879.1.peg.1293rxn10266	0.493174
COMMON	fig|158879.1.peg.2017	rxn11946	fig|158879.1.peg.2017rxn11946	0.0563347		COMMON	fig|158879.1.peg.2017	rxn11946	fig|158879.1.peg.2017rxn11946	0.0563347
COMMON	fig|158879.1.peg.2017	rxn03395	fig|158879.1.peg.2017rxn03395	0.0563347		COMMON	fig|158879.1.peg.2017	rxn03395	fig|158879.1.peg.2017rxn03395	0.0563347
COMMON	fig|158879.1.peg.1347	rxn10094	fig|158879.1.peg.1347rxn10094	0.694155		COMMON	fig|158879.1.peg.1347	rxn10094	fig|158879.1.peg.1347rxn10094	0.694155
COMMON	fig|158879.1.peg.1347	rxn03397	fig|158879.1.peg.1347rxn03397	0.694155		COMMON	fig|158879.1.peg.1347	rxn03397	fig|158879.1.peg.1347rxn03397	0.694155
COMMON	fig|158879.1.peg.1528	rxn11946	fig|158879.1.peg.1528rxn11946	0.0563347		COMMON	fig|158879.1.peg.1528	rxn11946	fig|158879.1.peg.1528rxn11946	0.0563347
COMMON	fig|158879.1.peg.1528	rxn03395	fig|158879.1.peg.1528rxn03395	0.0563347		COMMON	fig|158879.1.peg.1528	rxn03395	fig|158879.1.peg.1528rxn03395	0.0563347
COMMON	fig|158879.1.peg.925	rxn11703	fig|158879.1.peg.925rxn11703	0.790242		COMMON	fig|158879.1.peg.925	rxn11703	fig|158879.1.peg.925rxn11703	0.790242
COMMON	fig|158879.1.peg.900	rxn02011	fig|158879.1.peg.900rxn02011	0.892157		COMMON	fig|158879.1.peg.900	rxn02011	fig|158879.1.peg.900rxn02011	0.892157
COMMON	fig|158879.1.peg.787	rxn11946	fig|158879.1.peg.787rxn11946	0.0563347		COMMON	fig|158879.1.peg.787	rxn11946	fig|158879.1.peg.787rxn11946	0.0563347
COMMON	fig|158879.1.peg.787	rxn03395	fig|158879.1.peg.787rxn03395	0.0563347		COMMON	fig|158879.1.peg.787	rxn03395	fig|158879.1.peg.787rxn03395	0.0563347
COMMON	fig|158879.1.peg.1136	rxn00119	fig|158879.1.peg.1136rxn00119	0.970087		COMMON	fig|158879.1.peg.1136	rxn00119	fig|158879.1.peg.1136rxn00119	0.970087
COMMON	fig|158879.1.peg.922	rxn08333	fig|158879.1.peg.922rxn08333	0.494756		COMMON	fig|158879.1.peg.922	rxn08333	fig|158879.1.peg.922rxn08333	0.494756
COMMON	fig|158879.1.peg.2274	rxn02056	fig|158879.1.peg.2274rxn02056	0.43393		COMMON	fig|158879.1.peg.2274	rxn02056	fig|158879.1.peg.2274rxn02056	0.43393
COMMON	fig|158879.1.peg.49	rxn11946	fig|158879.1.peg.49rxn11946	0.0573492		COMMON	fig|158879.1.peg.49	rxn11946	fig|158879.1.peg.49rxn11946	0.0573492
COMMON	fig|158879.1.peg.49	rxn03395	fig|158879.1.peg.49rxn03395	0.0573492		COMMON	fig|158879.1.peg.49	rxn03395	fig|158879.1.peg.49rxn03395	0.0573492
COMMON	fig|158879.1.peg.2186	rxn02160	fig|158879.1.peg.2186rxn02160	0.143573		COMMON	fig|158879.1.peg.2186	rxn02160	fig|158879.1.peg.2186rxn02160	0.143573
COMMON	fig|158879.1.peg.2470	rxn11946	fig|158879.1.peg.2470rxn11946	0.0563347		COMMON	fig|158879.1.peg.2470	rxn11946	fig|158879.1.peg.2470rxn11946	0.0563347
COMMON	fig|158879.1.peg.2470	rxn03395	fig|158879.1.peg.2470rxn03395	0.0563347		COMMON	fig|158879.1.peg.2470	rxn03395	fig|158879.1.peg.2470rxn03395	0.0563347
COMMON	fig|169963.1.peg.1201	rxn05029	fig|169963.1.peg.1201rxn05029	0.984527		COMMON	fig|169963.1.peg.1201	rxn05029	fig|169963.1.peg.1201rxn05029	0.984527
COMMON	fig|169963.1.peg.1305	rxn00119	fig|169963.1.peg.1305rxn00119	0.984871		COMMON	fig|169963.1.peg.1305	rxn00119	fig|169963.1.peg.1305rxn00119	0.984871
COMMON	fig|169963.1.peg.1669	rxn08333	fig|169963.1.peg.1669rxn08333	0.530442		COMMON	fig|169963.1.peg.1669	rxn08333	fig|169963.1.peg.1669rxn08333	0.530442
COMMON	fig|169963.1.peg.906	rxn00979	fig|169963.1.peg.906rxn00979	0.0716649		COMMON	fig|169963.1.peg.906	rxn00979	fig|169963.1.peg.906rxn00979	0.0716649
COMMON	fig|169963.1.peg.1666	rxn11703	fig|169963.1.peg.1666rxn11703	0.877492		COMMON	fig|169963.1.peg.1666	rxn11703	fig|169963.1.peg.1666rxn11703	0.877492
COMMON	fig|169963.1.peg.2545	rxn10193	fig|169963.1.peg.2545rxn10193	0.011817		COMMON	fig|169963.1.peg.2545	rxn10193	fig|169963.1.peg.2545rxn10193	0.011817
COMMON	fig|169963.1.peg.2545	rxn10302	fig|169963.1.peg.2545rxn10302	0.011817		COMMON	fig|169963.1.peg.2545	rxn10302	fig|169963.1.peg.2545rxn10302	0.011817
COMMON	fig|169963.1.peg.2545	rxn10300	fig|169963.1.peg.2545rxn10300	0.011817		COMMON	fig|169963.1.peg.2545	rxn10300	fig|169963.1.peg.2545rxn10300	0.011817
COMMON	fig|169963.1.peg.2545	rxn10301	fig|169963.1.peg.2545rxn10301	0.011817		COMMON	fig|169963.1.peg.2545	rxn10301	fig|169963.1.peg.2545rxn10301	0.011817
COMMON	fig|169963.1.peg.1615	rxn09106	fig|169963.1.peg.1615rxn09106	0.513679		COMMON	fig|169963.1.peg.1615	rxn09106	fig|169963.1.peg.1615rxn09106	0.513679
COMMON	fig|169963.1.peg.1615	rxn10265	fig|169963.1.peg.1615rxn10265	0.513679		COMMON	fig|169963.1.peg.1615	rxn10265	fig|169963.1.peg.1615rxn10265	0.513679
COMMON	fig|169963.1.peg.1615	rxn10266	fig|169963.1.peg.1615rxn10266	0.513679		COMMON	fig|169963.1.peg.1615	rxn10266	fig|169963.1.peg.1615rxn10266	0.513679
COMMON	fig|169963.1.peg.520	rxn10232	fig|169963.1.peg.520rxn10232	0.487179		COMMON	fig|169963.1.peg.520	rxn10232	fig|169963.1.peg.520rxn10232	0.487179
COMMON	fig|169963.1.peg.520	rxn10233	fig|169963.1.peg.520rxn10233	0.487179		COMMON	fig|169963.1.peg.520	rxn10233	fig|169963.1.peg.520rxn10233	0.487179
COMMON	fig|169963.1.peg.520	rxn09202	fig|169963.1.peg.520rxn09202	0.487179		COMMON	fig|169963.1.peg.520	rxn09202	fig|169963.1.peg.520rxn09202	0.487179
COMMON	fig|169963.1.peg.2514	rxn05406	fig|169963.1.peg.2514rxn05406	0.759262		COMMON	fig|169963.1.peg.2514	rxn05406	fig|169963.1.peg.2514rxn05406	0.759262
COMMON	fig|169963.1.peg.2514	rxn05390	fig|169963.1.peg.2514rxn05390	0.759262		COMMON	fig|169963.1.peg.2514	rxn05390	fig|169963.1.peg.2514rxn05390	0.759262
COMMON	fig|169963.1.peg.2514	rxn05402	fig|169963.1.peg.2514rxn05402	0.759262		COMMON	fig|169963.1.peg.2514	rxn05402	fig|169963.1.peg.2514rxn05402	0.759262
COMMON	fig|169963.1.peg.2514	rxn05386	fig|169963.1.peg.2514rxn05386	0.759262		COMMON	fig|169963.1.peg.2514	rxn05386	fig|169963.1.peg.2514rxn05386	0.759262
COMMON	fig|169963.1.peg.2514	rxn05394	fig|169963.1.peg.2514rxn05394	0.759262		COMMON	fig|169963.1.peg.2514	rxn05394	fig|169963.1.peg.2514rxn05394	0.759262
COMMON	fig|169963.1.peg.2514	rxn05377	fig|169963.1.peg.2514rxn05377	0.759262		COMMON	fig|169963.1.peg.2514	rxn05377	fig|169963.1.peg.2514rxn05377	0.759262
COMMON	fig|169963.1.peg.2514	rxn05398	fig|169963.1.peg.2514rxn05398	0.759262		COMMON	fig|169963.1.peg.2514	rxn05398	fig|169963.1.peg.2514rxn05398	0.759262
COMMON	fig|169963.1.peg.2514	rxn05381	fig|169963.1.peg.2514rxn05381	0.759262		COMMON	fig|169963.1.peg.2514	rxn05381	fig|169963.1.peg.2514rxn05381	0.759262
COMMON	fig|169963.1.peg.2514	rxn05373	fig|169963.1.peg.2514rxn05373	0.759262		COMMON	fig|169963.1.peg.2514	rxn05373	fig|169963.1.peg.2514rxn05373	0.759262
COMMON	fig|169963.1.peg.2514	rxn05365	fig|169963.1.peg.2514rxn05365	0.759262		COMMON	fig|169963.1.peg.2514	rxn05365	fig|169963.1.peg.2514rxn05365	0.759262
COMMON	fig|169963.1.peg.2514	rxn05369	fig|169963.1.peg.2514rxn05369	0.759262		COMMON	fig|169963.1.peg.2514	rxn05369	fig|169963.1.peg.2514rxn05369	0.759262
COMMON	fig|169963.1.peg.2514	rxn05361	fig|169963.1.peg.2514rxn05361	0.759262		COMMON	fig|169963.1.peg.2514	rxn05361	fig|169963.1.peg.2514rxn05361	0.759262
COMMON	fig|169963.1.peg.2008	rxn09106	fig|169963.1.peg.2008rxn09106	0.577114		COMMON	fig|169963.1.peg.2008	rxn09106	fig|169963.1.peg.2008rxn09106	0.577114
COMMON	fig|169963.1.peg.2008	rxn10265	fig|169963.1.peg.2008rxn10265	0.577114		COMMON	fig|169963.1.peg.2008	rxn10265	fig|169963.1.peg.2008rxn10265	0.577114
COMMON	fig|169963.1.peg.2008	rxn10266	fig|169963.1.peg.2008rxn10266	0.577114		COMMON	fig|169963.1.peg.2008	rxn10266	fig|169963.1.peg.2008rxn10266	0.577114
COMMON	fig|169963.1.peg.341	rxn05040	fig|169963.1.peg.341rxn05040	0.00639218		COMMON	fig|169963.1.peg.341	rxn05040	fig|169963.1.peg.341rxn05040	0.00639218
COMMON	fig|169963.1.peg.1077	rxn10291	fig|169963.1.peg.1077rxn10291	0.182392		COMMON	fig|169963.1.peg.1077	rxn10291	fig|169963.1.peg.1077rxn10291	0.182392
COMMON	fig|169963.1.peg.1077	rxn10292	fig|169963.1.peg.1077rxn10292	0.182392		COMMON	fig|169963.1.peg.1077	rxn10292	fig|169963.1.peg.1077rxn10292	0.182392
COMMON	fig|169963.1.peg.1077	rxn10293	fig|169963.1.peg.1077rxn10293	0.182392		COMMON	fig|169963.1.peg.1077	rxn10293	fig|169963.1.peg.1077rxn10293	0.182392
COMMON	fig|169963.1.peg.2935	rxn10232	fig|169963.1.peg.2935rxn10232	0.431018		COMMON	fig|169963.1.peg.2935	rxn10232	fig|169963.1.peg.2935rxn10232	0.431018
COMMON	fig|169963.1.peg.2935	rxn10233	fig|169963.1.peg.2935rxn10233	0.431018		COMMON	fig|169963.1.peg.2935	rxn10233	fig|169963.1.peg.2935rxn10233	0.431018
COMMON	fig|169963.1.peg.2935	rxn09202	fig|169963.1.peg.2935rxn09202	0.431018		COMMON	fig|169963.1.peg.2935	rxn09202	fig|169963.1.peg.2935rxn09202	0.431018
COMMON	fig|169963.1.peg.1072	rxn10197	fig|169963.1.peg.1072rxn10197	0.029083		COMMON	fig|169963.1.peg.1072	rxn10197	fig|169963.1.peg.1072rxn10197	0.029083
COMMON	fig|169963.1.peg.1427	rxn01644	fig|169963.1.peg.1427rxn01644	0.0393207		COMMON	fig|169963.1.peg.1427	rxn01644	fig|169963.1.peg.1427rxn01644	0.0393207
COMMON	fig|169963.1.peg.2632	rxn03167	fig|169963.1.peg.2632rxn03167	0.781596		COMMON	fig|169963.1.peg.2632	rxn03167	fig|169963.1.peg.2632rxn03167	0.781596
COMMON	fig|169963.1.peg.1140	rxn03538	fig|169963.1.peg.1140rxn03538	0.90317		COMMON	fig|169963.1.peg.1140	rxn03538	fig|169963.1.peg.1140rxn03538	0.90317
COMMON	fig|169963.1.peg.805	rxn00102	fig|169963.1.peg.805rxn00102	0.892662		COMMON	fig|169963.1.peg.805	rxn00102	fig|169963.1.peg.805rxn00102	0.892662
COMMON	fig|169963.1.peg.1456	rxn08299	fig|169963.1.peg.1456rxn08299	0.959496		COMMON	fig|169963.1.peg.1456	rxn08299	fig|169963.1.peg.1456rxn08299	0.959496
COMMON	fig|169963.1.peg.1456	rxn10253	fig|169963.1.peg.1456rxn10253	0.959496		COMMON	fig|169963.1.peg.1456	rxn10253	fig|169963.1.peg.1456rxn10253	0.959496
COMMON	fig|169963.1.peg.1456	rxn10254	fig|169963.1.peg.1456rxn10254	0.959496		COMMON	fig|169963.1.peg.1456	rxn10254	fig|169963.1.peg.1456rxn10254	0.959496
COMMON	fig|169963.1.peg.1898	rxn02929	fig|169963.1.peg.1898rxn02929	0.246982		COMMON	fig|169963.1.peg.1898	rxn02929	fig|169963.1.peg.1898rxn02929	0.246982
COMMON	fig|169963.1.peg.1702	rxn00623	fig|169963.1.peg.1702rxn00623	0.00756582		COMMON	fig|169963.1.peg.1702	rxn00623	fig|169963.1.peg.1702rxn00623	0.00756582
COMMON	fig|169963.1.peg.1156	rxn05029	fig|169963.1.peg.1156rxn05029	0.962129		COMMON	fig|169963.1.peg.1156	rxn05029	fig|169963.1.peg.1156rxn05029	0.962129
COMMON	fig|171101.1.peg.1325	rxn08528	fig|171101.1.peg.1325rxn08528	0.927932		COMMON	fig|171101.1.peg.1325	rxn08528	fig|171101.1.peg.1325rxn08528	0.927932
COMMON	fig|171101.1.peg.1325	rxn08527	fig|171101.1.peg.1325rxn08527	0.927932		COMMON	fig|171101.1.peg.1325	rxn08527	fig|171101.1.peg.1325rxn08527	0.927932
COMMON	fig|171101.1.peg.1324	rxn08528	fig|171101.1.peg.1324rxn08528	0.901161		COMMON	fig|171101.1.peg.1324	rxn08528	fig|171101.1.peg.1324rxn08528	0.901161
COMMON	fig|171101.1.peg.1324	rxn08527	fig|171101.1.peg.1324rxn08527	0.901161		COMMON	fig|171101.1.peg.1324	rxn08527	fig|171101.1.peg.1324rxn08527	0.901161
COMMON	fig|171101.1.peg.2194	rxn00621	fig|171101.1.peg.2194rxn00621	0.390011		COMMON	fig|171101.1.peg.2194	rxn00621	fig|171101.1.peg.2194rxn00621	0.390011
COMMON	fig|171101.1.peg.2003	rxn03135	fig|171101.1.peg.2003rxn03135	0.00826048		COMMON	fig|171101.1.peg.2003	rxn03135	fig|171101.1.peg.2003rxn03135	0.00826048
COMMON	fig|171101.1.peg.1174	rxn00623	fig|171101.1.peg.1174rxn00623	0.0326911		COMMON	fig|171101.1.peg.1174	rxn00623	fig|171101.1.peg.1174rxn00623	0.0326911
COMMON	fig|171101.1.peg.1383	rxn02011	fig|171101.1.peg.1383rxn02011	0.194934		COMMON	fig|171101.1.peg.1383	rxn02011	fig|171101.1.peg.1383rxn02011	0.194934
COMMON	fig|171101.1.peg.919	rxn01644	fig|171101.1.peg.919rxn01644	0.00790187		COMMON	fig|171101.1.peg.919	rxn01644	fig|171101.1.peg.919rxn01644	0.00790187
COMMON	fig|171101.1.peg.919	rxn02988	fig|171101.1.peg.919rxn02988	0.0305104		COMMON	fig|171101.1.peg.919	rxn02988	fig|171101.1.peg.919rxn02988	0.0305104
COMMON	fig|171101.1.peg.1435	rxn10094	fig|171101.1.peg.1435rxn10094	0.371169		COMMON	fig|171101.1.peg.1435	rxn10094	fig|171101.1.peg.1435rxn10094	0.371169
COMMON	fig|171101.1.peg.1435	rxn03397	fig|171101.1.peg.1435rxn03397	0.371169		COMMON	fig|171101.1.peg.1435	rxn03397	fig|171101.1.peg.1435rxn03397	0.371169
COMMON	fig|171101.1.peg.375	rxn02898	fig|171101.1.peg.375rxn02898	0.00631286		COMMON	fig|171101.1.peg.375	rxn02898	fig|171101.1.peg.375rxn02898	0.00631286
COMMON	fig|171101.1.peg.2099	rxn10196	fig|171101.1.peg.2099rxn10196	0.292452		COMMON	fig|171101.1.peg.2099	rxn10196	fig|171101.1.peg.2099rxn10196	0.292452
COMMON	fig|171101.1.peg.2099	rxn10195	fig|171101.1.peg.2099rxn10195	0.292452		COMMON	fig|171101.1.peg.2099	rxn10195	fig|171101.1.peg.2099rxn10195	0.292452
COMMON	fig|171101.1.peg.2099	rxn10194	fig|171101.1.peg.2099rxn10194	0.292452		COMMON	fig|171101.1.peg.2099	rxn10194	fig|171101.1.peg.2099rxn10194	0.292452
COMMON	fig|171101.1.peg.1413	rxn02929	fig|171101.1.peg.1413rxn02929	0.215545		COMMON	fig|171101.1.peg.1413	rxn02929	fig|171101.1.peg.1413rxn02929	0.215545
COMMON	fig|171101.1.peg.1144	rxn02320	fig|171101.1.peg.1144rxn02320	0.00326939		COMMON	fig|171101.1.peg.1144	rxn02320	fig|171101.1.peg.1144rxn02320	0.00326939
COMMON	fig|171101.1.peg.490	rxn08040	fig|171101.1.peg.490rxn08040	0.00264527		COMMON	fig|171101.1.peg.490	rxn08040	fig|171101.1.peg.490rxn08040	0.00264527
COMMON	fig|171101.1.peg.490	rxn10311	fig|171101.1.peg.490rxn10311	0.00264527		COMMON	fig|171101.1.peg.490	rxn10311	fig|171101.1.peg.490rxn10311	0.00264527
COMMON	fig|171101.1.peg.490	rxn10310	fig|171101.1.peg.490rxn10310	0.00264527		COMMON	fig|171101.1.peg.490	rxn10310	fig|171101.1.peg.490rxn10310	0.00264527
COMMON	fig|171101.1.peg.490	rxn10309	fig|171101.1.peg.490rxn10309	0.00264527		COMMON	fig|171101.1.peg.490	rxn10309	fig|171101.1.peg.490rxn10309	0.00264527
COMMON	fig|171101.1.peg.72	rxn10197	fig|171101.1.peg.72rxn10197	0.020702		COMMON	fig|171101.1.peg.72	rxn10197	fig|171101.1.peg.72rxn10197	0.020702
COMMON	fig|171101.1.peg.72	rxn10293	fig|171101.1.peg.72rxn10293	0.0288872		COMMON	fig|171101.1.peg.72	rxn10293	fig|171101.1.peg.72rxn10293	0.0288872
COMMON	fig|171101.1.peg.72	rxn10192	fig|171101.1.peg.72rxn10192	0.0288872		COMMON	fig|171101.1.peg.72	rxn10192	fig|171101.1.peg.72rxn10192	0.0288872
COMMON	fig|171101.1.peg.72	rxn10292	fig|171101.1.peg.72rxn10292	0.0288872		COMMON	fig|171101.1.peg.72	rxn10292	fig|171101.1.peg.72rxn10292	0.0288872
COMMON	fig|171101.1.peg.72	rxn10291	fig|171101.1.peg.72rxn10291	0.0288872		COMMON	fig|171101.1.peg.72	rxn10291	fig|171101.1.peg.72rxn10291	0.0288872
COMMON	fig|171101.1.peg.1449	rxn09997	fig|171101.1.peg.1449rxn09997	0.00339383		COMMON	fig|171101.1.peg.1449	rxn09997	fig|171101.1.peg.1449rxn09997	0.00339383
COMMON	fig|171101.1.peg.1586	rxn11946	fig|171101.1.peg.1586rxn11946	0.000371122		COMMON	fig|171101.1.peg.1586	rxn11946	fig|171101.1.peg.1586rxn11946	0.000371122
COMMON	fig|171101.1.peg.1586	rxn03395	fig|171101.1.peg.1586rxn03395	0.000371122		COMMON	fig|171101.1.peg.1586	rxn03395	fig|171101.1.peg.1586rxn03395	0.000371122
COMMON	fig|171101.1.peg.1375	rxn02320	fig|171101.1.peg.1375rxn02320	0.0152749		COMMON	fig|171101.1.peg.1375	rxn02320	fig|171101.1.peg.1375rxn02320	0.0152749
COMMON	fig|171101.1.peg.961	rxn00297	fig|171101.1.peg.961rxn00297	0.00492068		COMMON	fig|171101.1.peg.961	rxn00297	fig|171101.1.peg.961rxn00297	0.00492068
COMMON	fig|171101.1.peg.592	rxn05391	fig|171101.1.peg.592rxn05391	0.00646017		COMMON	fig|171101.1.peg.592	rxn05391	fig|171101.1.peg.592rxn05391	0.00646017
COMMON	fig|171101.1.peg.592	rxn05395	fig|171101.1.peg.592rxn05395	0.00646017		COMMON	fig|171101.1.peg.592	rxn05395	fig|171101.1.peg.592rxn05395	0.00646017
COMMON	fig|171101.1.peg.592	rxn05387	fig|171101.1.peg.592rxn05387	0.00646017		COMMON	fig|171101.1.peg.592	rxn05387	fig|171101.1.peg.592rxn05387	0.00646017
COMMON	fig|171101.1.peg.592	rxn05362	fig|171101.1.peg.592rxn05362	0.00646017		COMMON	fig|171101.1.peg.592	rxn05362	fig|171101.1.peg.592rxn05362	0.00646017
COMMON	fig|171101.1.peg.592	rxn05374	fig|171101.1.peg.592rxn05374	0.00646017		COMMON	fig|171101.1.peg.592	rxn05374	fig|171101.1.peg.592rxn05374	0.00646017
COMMON	fig|171101.1.peg.592	rxn05366	fig|171101.1.peg.592rxn05366	0.00646017		COMMON	fig|171101.1.peg.592	rxn05366	fig|171101.1.peg.592rxn05366	0.00646017
COMMON	fig|171101.1.peg.592	rxn05444	fig|171101.1.peg.592rxn05444	0.00953744		COMMON	fig|171101.1.peg.592	rxn05444	fig|171101.1.peg.592rxn05444	0.00953744
COMMON	fig|171101.1.peg.592	rxn05443	fig|171101.1.peg.592rxn05443	0.00953744		COMMON	fig|171101.1.peg.592	rxn05443	fig|171101.1.peg.592rxn05443	0.00953744
COMMON	fig|171101.1.peg.592	rxn05438	fig|171101.1.peg.592rxn05438	0.00953744		COMMON	fig|171101.1.peg.592	rxn05438	fig|171101.1.peg.592rxn05438	0.00953744
COMMON	fig|171101.1.peg.592	rxn05442	fig|171101.1.peg.592rxn05442	0.00953744		COMMON	fig|171101.1.peg.592	rxn05442	fig|171101.1.peg.592rxn05442	0.00953744
COMMON	fig|171101.1.peg.592	rxn05437	fig|171101.1.peg.592rxn05437	0.00953744		COMMON	fig|171101.1.peg.592	rxn05437	fig|171101.1.peg.592rxn05437	0.00953744
COMMON	fig|171101.1.peg.592	rxn05435	fig|171101.1.peg.592rxn05435	0.00953744		COMMON	fig|171101.1.peg.592	rxn05435	fig|171101.1.peg.592rxn05435	0.00953744
COMMON	fig|171101.1.peg.384	rxn05406	fig|171101.1.peg.384rxn05406	0.720964		COMMON	fig|171101.1.peg.384	rxn05406	fig|171101.1.peg.384rxn05406	0.720964
COMMON	fig|171101.1.peg.384	rxn05369	fig|171101.1.peg.384rxn05369	0.720964		COMMON	fig|171101.1.peg.384	rxn05369	fig|171101.1.peg.384rxn05369	0.720964
COMMON	fig|171101.1.peg.384	rxn05402	fig|171101.1.peg.384rxn05402	0.720964		COMMON	fig|171101.1.peg.384	rxn05402	fig|171101.1.peg.384rxn05402	0.720964
COMMON	fig|171101.1.peg.384	rxn05386	fig|171101.1.peg.384rxn05386	0.720964		COMMON	fig|171101.1.peg.384	rxn05386	fig|171101.1.peg.384rxn05386	0.720964
COMMON	fig|171101.1.peg.384	rxn05381	fig|171101.1.peg.384rxn05381	0.720964		COMMON	fig|171101.1.peg.384	rxn05381	fig|171101.1.peg.384rxn05381	0.720964
COMMON	fig|171101.1.peg.384	rxn05398	fig|171101.1.peg.384rxn05398	0.720964		COMMON	fig|171101.1.peg.384	rxn05398	fig|171101.1.peg.384rxn05398	0.720964
COMMON	fig|171101.1.peg.384	rxn05377	fig|171101.1.peg.384rxn05377	0.720964		COMMON	fig|171101.1.peg.384	rxn05377	fig|171101.1.peg.384rxn05377	0.720964
COMMON	fig|171101.1.peg.384	rxn05361	fig|171101.1.peg.384rxn05361	0.720964		COMMON	fig|171101.1.peg.384	rxn05361	fig|171101.1.peg.384rxn05361	0.720964
COMMON	fig|171101.1.peg.384	rxn05373	fig|171101.1.peg.384rxn05373	0.720964		COMMON	fig|171101.1.peg.384	rxn05373	fig|171101.1.peg.384rxn05373	0.720964
COMMON	fig|171101.1.peg.384	rxn05365	fig|171101.1.peg.384rxn05365	0.720964		COMMON	fig|171101.1.peg.384	rxn05365	fig|171101.1.peg.384rxn05365	0.720964
COMMON	fig|171101.1.peg.384	rxn05394	fig|171101.1.peg.384rxn05394	0.720964		COMMON	fig|171101.1.peg.384	rxn05394	fig|171101.1.peg.384rxn05394	0.720964
COMMON	fig|171101.1.peg.384	rxn05390	fig|171101.1.peg.384rxn05390	0.720964		COMMON	fig|171101.1.peg.384	rxn05390	fig|171101.1.peg.384rxn05390	0.720964
COMMON	fig|171101.1.peg.135	rxn10193	fig|171101.1.peg.135rxn10193	0.126689		COMMON	fig|171101.1.peg.135	rxn10193	fig|171101.1.peg.135rxn10193	0.126689
COMMON	fig|171101.1.peg.135	rxn10302	fig|171101.1.peg.135rxn10302	0.126689		COMMON	fig|171101.1.peg.135	rxn10302	fig|171101.1.peg.135rxn10302	0.126689
COMMON	fig|171101.1.peg.135	rxn10300	fig|171101.1.peg.135rxn10300	0.126689		COMMON	fig|171101.1.peg.135	rxn10300	fig|171101.1.peg.135rxn10300	0.126689
COMMON	fig|171101.1.peg.135	rxn10301	fig|171101.1.peg.135rxn10301	0.126689		COMMON	fig|171101.1.peg.135	rxn10301	fig|171101.1.peg.135rxn10301	0.126689
COMMON	fig|171101.1.peg.887	rxn03150	fig|171101.1.peg.887rxn03150	0.0498841		COMMON	fig|171101.1.peg.887	rxn03150	fig|171101.1.peg.887rxn03150	0.0498841
COMMON	fig|171101.1.peg.1402	rxn03167	fig|171101.1.peg.1402rxn03167	0.000104237		COMMON	fig|171101.1.peg.1402	rxn03167	fig|171101.1.peg.1402rxn03167	0.000104237
COMMON	fig|208964.1.peg.3654	rxn00119	fig|208964.1.peg.3654rxn00119	0.974301		COMMON	fig|208964.1.peg.3654	rxn00119	fig|208964.1.peg.3654rxn00119	0.974301
COMMON	fig|208964.1.peg.3645	rxn05406	fig|208964.1.peg.3645rxn05406	0.726151		COMMON	fig|208964.1.peg.3645	rxn05406	fig|208964.1.peg.3645rxn05406	0.726151
COMMON	fig|208964.1.peg.3645	rxn05390	fig|208964.1.peg.3645rxn05390	0.726151		COMMON	fig|208964.1.peg.3645	rxn05390	fig|208964.1.peg.3645rxn05390	0.726151
COMMON	fig|208964.1.peg.3645	rxn05402	fig|208964.1.peg.3645rxn05402	0.726151		COMMON	fig|208964.1.peg.3645	rxn05402	fig|208964.1.peg.3645rxn05402	0.726151
COMMON	fig|208964.1.peg.3645	rxn05386	fig|208964.1.peg.3645rxn05386	0.726151		COMMON	fig|208964.1.peg.3645	rxn05386	fig|208964.1.peg.3645rxn05386	0.726151
COMMON	fig|208964.1.peg.3645	rxn05394	fig|208964.1.peg.3645rxn05394	0.726151		COMMON	fig|208964.1.peg.3645	rxn05394	fig|208964.1.peg.3645rxn05394	0.726151
COMMON	fig|208964.1.peg.3645	rxn05377	fig|208964.1.peg.3645rxn05377	0.726151		COMMON	fig|208964.1.peg.3645	rxn05377	fig|208964.1.peg.3645rxn05377	0.726151
COMMON	fig|208964.1.peg.3645	rxn05398	fig|208964.1.peg.3645rxn05398	0.726151		COMMON	fig|208964.1.peg.3645	rxn05398	fig|208964.1.peg.3645rxn05398	0.726151
COMMON	fig|208964.1.peg.3645	rxn05381	fig|208964.1.peg.3645rxn05381	0.726151		COMMON	fig|208964.1.peg.3645	rxn05381	fig|208964.1.peg.3645rxn05381	0.726151
COMMON	fig|208964.1.peg.3645	rxn05373	fig|208964.1.peg.3645rxn05373	0.726151		COMMON	fig|208964.1.peg.3645	rxn05373	fig|208964.1.peg.3645rxn05373	0.726151
COMMON	fig|208964.1.peg.3645	rxn05369	fig|208964.1.peg.3645rxn05369	0.726151		COMMON	fig|208964.1.peg.3645	rxn05369	fig|208964.1.peg.3645rxn05369	0.726151
COMMON	fig|208964.1.peg.3645	rxn05462	fig|208964.1.peg.3645rxn05462	0.726151		COMMON	fig|208964.1.peg.3645	rxn05462	fig|208964.1.peg.3645rxn05462	0.726151
COMMON	fig|208964.1.peg.3645	rxn05365	fig|208964.1.peg.3645rxn05365	0.726151		COMMON	fig|208964.1.peg.3645	rxn05365	fig|208964.1.peg.3645rxn05365	0.726151
COMMON	fig|208964.1.peg.3645	rxn05361	fig|208964.1.peg.3645rxn05361	0.726151		COMMON	fig|208964.1.peg.3645	rxn05361	fig|208964.1.peg.3645rxn05361	0.726151
COMMON	fig|208964.1.peg.1011	rxn01644	fig|208964.1.peg.1011rxn01644	0.0101375		COMMON	fig|208964.1.peg.1011	rxn01644	fig|208964.1.peg.1011rxn01644	0.0101375
COMMON	fig|208964.1.peg.4231	rxn01258	fig|208964.1.peg.4231rxn01258	0.698388		COMMON	fig|208964.1.peg.4231	rxn01258	fig|208964.1.peg.4231rxn01258	0.698388
COMMON	fig|208964.1.peg.5060	rxn10094	fig|208964.1.peg.5060rxn10094	0.840994		COMMON	fig|208964.1.peg.5060	rxn10094	fig|208964.1.peg.5060rxn10094	0.840994
COMMON	fig|208964.1.peg.5060	rxn03397	fig|208964.1.peg.5060rxn03397	0.840994		COMMON	fig|208964.1.peg.5060	rxn03397	fig|208964.1.peg.5060rxn03397	0.840994
COMMON	fig|208964.1.peg.1749	rxn02898	fig|208964.1.peg.1749rxn02898	0.0061034		COMMON	fig|208964.1.peg.1749	rxn02898	fig|208964.1.peg.1749rxn02898	0.0061034
COMMON	fig|208964.1.peg.2215	rxn02832	fig|208964.1.peg.2215rxn02832	0.0201267		COMMON	fig|208964.1.peg.2215	rxn02832	fig|208964.1.peg.2215rxn02832	0.0201267
COMMON	fig|208964.1.peg.3923	rxn02831	fig|208964.1.peg.3923rxn02831	0.0642044		COMMON	fig|208964.1.peg.3923	rxn02831	fig|208964.1.peg.3923rxn02831	0.0642044
COMMON	fig|208964.1.peg.2890	rxn02898	fig|208964.1.peg.2890rxn02898	0.00498092		COMMON	fig|208964.1.peg.2890	rxn02898	fig|208964.1.peg.2890rxn02898	0.00498092
COMMON	fig|208964.1.peg.4970	rxn09997	fig|208964.1.peg.4970rxn09997	0.735412		COMMON	fig|208964.1.peg.4970	rxn09997	fig|208964.1.peg.4970rxn09997	0.735412
COMMON	fig|208964.1.peg.4757	rxn02929	fig|208964.1.peg.4757rxn02929	0.403403		COMMON	fig|208964.1.peg.4757	rxn02929	fig|208964.1.peg.4757rxn02929	0.403403
COMMON	fig|208964.1.peg.5445	rxn08713	fig|208964.1.peg.5445rxn08713	0.0697906		COMMON	fig|208964.1.peg.5445	rxn08713	fig|208964.1.peg.5445rxn08713	0.0697906
COMMON	fig|208964.1.peg.3004	rxn01022	fig|208964.1.peg.3004rxn01022	0.946296		COMMON	fig|208964.1.peg.3004	rxn01022	fig|208964.1.peg.3004rxn01022	0.946296
COMMON	fig|208964.1.peg.2239	rxn08713	fig|208964.1.peg.2239rxn08713	0.0650669		COMMON	fig|208964.1.peg.2239	rxn08713	fig|208964.1.peg.2239rxn08713	0.0650669
COMMON	fig|208964.1.peg.4656	rxn02304	fig|208964.1.peg.4656rxn02304	0.00279031		COMMON	fig|208964.1.peg.4656	rxn02304	fig|208964.1.peg.4656rxn02304	0.00279031
COMMON	fig|208964.1.peg.1282	rxn03538	fig|208964.1.peg.1282rxn03538	0.890963		COMMON	fig|208964.1.peg.1282	rxn03538	fig|208964.1.peg.1282rxn03538	0.890963
COMMON	fig|224308.1.peg.3644	rxn05406	fig|224308.1.peg.3644rxn05406	0.7655		COMMON	fig|224308.1.peg.3644	rxn05406	fig|224308.1.peg.3644rxn05406	0.7655
COMMON	fig|224308.1.peg.3644	rxn05390	fig|224308.1.peg.3644rxn05390	0.7655		COMMON	fig|224308.1.peg.3644	rxn05390	fig|224308.1.peg.3644rxn05390	0.7655
COMMON	fig|224308.1.peg.3644	rxn05402	fig|224308.1.peg.3644rxn05402	0.7655		COMMON	fig|224308.1.peg.3644	rxn05402	fig|224308.1.peg.3644rxn05402	0.7655
COMMON	fig|224308.1.peg.3644	rxn05386	fig|224308.1.peg.3644rxn05386	0.7655		COMMON	fig|224308.1.peg.3644	rxn05386	fig|224308.1.peg.3644rxn05386	0.7655
COMMON	fig|224308.1.peg.3644	rxn05394	fig|224308.1.peg.3644rxn05394	0.7655		COMMON	fig|224308.1.peg.3644	rxn05394	fig|224308.1.peg.3644rxn05394	0.7655
COMMON	fig|224308.1.peg.3644	rxn05377	fig|224308.1.peg.3644rxn05377	0.7655		COMMON	fig|224308.1.peg.3644	rxn05377	fig|224308.1.peg.3644rxn05377	0.7655
COMMON	fig|224308.1.peg.3644	rxn05398	fig|224308.1.peg.3644rxn05398	0.7655		COMMON	fig|224308.1.peg.3644	rxn05398	fig|224308.1.peg.3644rxn05398	0.7655
COMMON	fig|224308.1.peg.3644	rxn05381	fig|224308.1.peg.3644rxn05381	0.7655		COMMON	fig|224308.1.peg.3644	rxn05381	fig|224308.1.peg.3644rxn05381	0.7655
COMMON	fig|224308.1.peg.3644	rxn05373	fig|224308.1.peg.3644rxn05373	0.7655		COMMON	fig|224308.1.peg.3644	rxn05373	fig|224308.1.peg.3644rxn05373	0.7655
COMMON	fig|224308.1.peg.3644	rxn05365	fig|224308.1.peg.3644rxn05365	0.7655		COMMON	fig|224308.1.peg.3644	rxn05365	fig|224308.1.peg.3644rxn05365	0.7655
COMMON	fig|224308.1.peg.3644	rxn05369	fig|224308.1.peg.3644rxn05369	0.7655		COMMON	fig|224308.1.peg.3644	rxn05369	fig|224308.1.peg.3644rxn05369	0.7655
COMMON	fig|224308.1.peg.3644	rxn05361	fig|224308.1.peg.3644rxn05361	0.7655		COMMON	fig|224308.1.peg.3644	rxn05361	fig|224308.1.peg.3644rxn05361	0.7655
COMMON	fig|224308.1.peg.1561	rxn00379	fig|224308.1.peg.1561rxn00379	0.979672		COMMON	fig|224308.1.peg.1561	rxn00379	fig|224308.1.peg.1561rxn00379	0.979672
COMMON	fig|224308.1.peg.2534	rxn08299	fig|224308.1.peg.2534rxn08299	0.962482		COMMON	fig|224308.1.peg.2534	rxn08299	fig|224308.1.peg.2534rxn08299	0.962482
COMMON	fig|224308.1.peg.1564	rxn02056	fig|224308.1.peg.1564rxn02056	0.528669		COMMON	fig|224308.1.peg.1564	rxn02056	fig|224308.1.peg.1564rxn02056	0.528669
COMMON	fig|224308.1.peg.1034	rxn03150	fig|224308.1.peg.1034rxn03150	0.11825		COMMON	fig|224308.1.peg.1034	rxn03150	fig|224308.1.peg.1034rxn03150	0.11825
COMMON	fig|224308.1.peg.1680	rxn01644	fig|224308.1.peg.1680rxn01644	0.0299058		COMMON	fig|224308.1.peg.1680	rxn01644	fig|224308.1.peg.1680rxn01644	0.0299058
COMMON	fig|224308.1.peg.317	rxn10094	fig|224308.1.peg.317rxn10094	0.721513		COMMON	fig|224308.1.peg.317	rxn10094	fig|224308.1.peg.317rxn10094	0.721513
COMMON	fig|224308.1.peg.317	rxn03397	fig|224308.1.peg.317rxn03397	0.721513		COMMON	fig|224308.1.peg.317	rxn03397	fig|224308.1.peg.317rxn03397	0.721513
COMMON	fig|224308.1.peg.2279	rxn10094	fig|224308.1.peg.2279rxn10094	0.679206		COMMON	fig|224308.1.peg.2279	rxn10094	fig|224308.1.peg.2279rxn10094	0.679206
COMMON	fig|224308.1.peg.2279	rxn03397	fig|224308.1.peg.2279rxn03397	0.679206		COMMON	fig|224308.1.peg.2279	rxn03397	fig|224308.1.peg.2279rxn03397	0.679206
COMMON	fig|224308.1.peg.1050	rxn04139	fig|224308.1.peg.1050rxn04139	0.123409		COMMON	fig|224308.1.peg.1050	rxn04139	fig|224308.1.peg.1050rxn04139	0.123409
COMMON	fig|224308.1.peg.1050	rxn12224	fig|224308.1.peg.1050rxn12224	0.141165		COMMON	fig|224308.1.peg.1050	rxn12224	fig|224308.1.peg.1050rxn12224	0.141165
COMMON	fig|224308.1.peg.3084	rxn11703	fig|224308.1.peg.3084rxn11703	0.885844		COMMON	fig|224308.1.peg.3084	rxn11703	fig|224308.1.peg.3084rxn11703	0.885844
COMMON	fig|224308.1.peg.2253	rxn02929	fig|224308.1.peg.2253rxn02929	0.250964		COMMON	fig|224308.1.peg.2253	rxn02929	fig|224308.1.peg.2253rxn02929	0.250964
COMMON	fig|224308.1.peg.1092	rxn00379	fig|224308.1.peg.1092rxn00379	0.979971		COMMON	fig|224308.1.peg.1092	rxn00379	fig|224308.1.peg.1092rxn00379	0.979971
COMMON	fig|224308.1.peg.878	rxn09997	fig|224308.1.peg.878rxn09997	0.727418		COMMON	fig|224308.1.peg.878	rxn09997	fig|224308.1.peg.878rxn09997	0.727418
COMMON	fig|224308.1.peg.1011	rxn10199	fig|224308.1.peg.1011rxn10199	0.812647		COMMON	fig|224308.1.peg.1011	rxn10199	fig|224308.1.peg.1011rxn10199	0.812647
COMMON	fig|224308.1.peg.3660	rxn09106	fig|224308.1.peg.3660rxn09106	0.750039		COMMON	fig|224308.1.peg.3660	rxn09106	fig|224308.1.peg.3660rxn09106	0.750039
COMMON	fig|224308.1.peg.3660	rxn10265	fig|224308.1.peg.3660rxn10265	0.750039		COMMON	fig|224308.1.peg.3660	rxn10265	fig|224308.1.peg.3660rxn10265	0.750039
COMMON	fig|224308.1.peg.3660	rxn10266	fig|224308.1.peg.3660rxn10266	0.750039		COMMON	fig|224308.1.peg.3660	rxn10266	fig|224308.1.peg.3660rxn10266	0.750039
COMMON	fig|224308.1.peg.3321	rxn05029	fig|224308.1.peg.3321rxn05029	0.982777		COMMON	fig|224308.1.peg.3321	rxn05029	fig|224308.1.peg.3321rxn05029	0.982777
COMMON	fig|224308.1.peg.3854	rxn08333	fig|224308.1.peg.3854rxn08333	0.56673		COMMON	fig|224308.1.peg.3854	rxn08333	fig|224308.1.peg.3854rxn08333	0.56673
COMMON	fig|224308.1.peg.1654	rxn00119	fig|224308.1.peg.1654rxn00119	0.982227		COMMON	fig|224308.1.peg.1654	rxn00119	fig|224308.1.peg.1654rxn00119	0.982227
COMMON	fig|224308.1.peg.3174	rxn12008	fig|224308.1.peg.3174rxn12008	0.305015		COMMON	fig|224308.1.peg.3174	rxn12008	fig|224308.1.peg.3174rxn12008	0.305015
COMMON	fig|224308.1.peg.1667	rxn04413	fig|224308.1.peg.1667rxn04413	0.00236606		COMMON	fig|224308.1.peg.1667	rxn04413	fig|224308.1.peg.1667rxn04413	0.00236606
COMMON	fig|224308.1.peg.1667	rxn03537	fig|224308.1.peg.1667rxn03537	0.00236606		COMMON	fig|224308.1.peg.1667	rxn03537	fig|224308.1.peg.1667rxn03537	0.00236606
COMMON	fig|224308.1.peg.392	rxn00979	fig|224308.1.peg.392rxn00979	0.11607		COMMON	fig|224308.1.peg.392	rxn00979	fig|224308.1.peg.392rxn00979	0.11607
COMMON	fig|224308.1.peg.3152	rxn10199	fig|224308.1.peg.3152rxn10199	0.867465		COMMON	fig|224308.1.peg.3152	rxn10199	fig|224308.1.peg.3152rxn10199	0.867465
COMMON	fig|224308.1.peg.151	rxn11946	fig|224308.1.peg.151rxn11946	0.110879		COMMON	fig|224308.1.peg.151	rxn11946	fig|224308.1.peg.151rxn11946	0.110879
COMMON	fig|224308.1.peg.151	rxn03395	fig|224308.1.peg.151rxn03395	0.110879		COMMON	fig|224308.1.peg.151	rxn03395	fig|224308.1.peg.151rxn03395	0.110879
COMMON	fig|224308.1.peg.848	rxn02897	fig|224308.1.peg.848rxn02897	0.0204333		COMMON	fig|224308.1.peg.848	rxn02897	fig|224308.1.peg.848rxn02897	0.0204333
COMMON	fig|224308.1.peg.3757	rxn10199	fig|224308.1.peg.3757rxn10199	0.950734		COMMON	fig|224308.1.peg.3757	rxn10199	fig|224308.1.peg.3757rxn10199	0.950734
COMMON	fig|224308.1.peg.636	rxn00917	fig|224308.1.peg.636rxn00917	0.908939		COMMON	fig|224308.1.peg.636	rxn00917	fig|224308.1.peg.636rxn00917	0.908939
COMMON	fig|243273.1.peg.338	rxn11703	fig|243273.1.peg.338rxn11703	0.0123013		COMMON	fig|243273.1.peg.338	rxn11703	fig|243273.1.peg.338rxn11703	0.0123013
COMMON	fig|243273.1.peg.448	rxn01517	fig|243273.1.peg.448rxn01517	0.96405		COMMON	fig|243273.1.peg.448	rxn01517	fig|243273.1.peg.448rxn01517	0.96405
COMMON	fig|243273.1.peg.448	rxn00119	fig|243273.1.peg.448rxn00119	0.96405		COMMON	fig|243273.1.peg.448	rxn00119	fig|243273.1.peg.448rxn00119	0.96405
COMMON	fig|243273.1.peg.349	rxn09310	fig|243273.1.peg.349rxn09310	0.0486579		COMMON	fig|243273.1.peg.349	rxn09310	fig|243273.1.peg.349rxn09310	0.0486579
COMMON	fig|243273.1.peg.73	rxn05528	fig|243273.1.peg.73rxn05528	0.363459		COMMON	fig|243273.1.peg.73	rxn05528	fig|243273.1.peg.73rxn05528	0.363459
COMMON	fig|243273.1.peg.387	rxn09310	fig|243273.1.peg.387rxn09310	0.736475		COMMON	fig|243273.1.peg.387	rxn09310	fig|243273.1.peg.387rxn09310	0.736475
COMMON	fig|243273.1.peg.53	rxn00704	fig|243273.1.peg.53rxn00704	0.26152		COMMON	fig|243273.1.peg.53	rxn00704	fig|243273.1.peg.53rxn00704	0.26152
COMMON	fig|243277.1.peg.2642	rxn08333	fig|243277.1.peg.2642rxn08333	0.555692		COMMON	fig|243277.1.peg.2642	rxn08333	fig|243277.1.peg.2642rxn08333	0.555692
COMMON	fig|243277.1.peg.61	rxn09997	fig|243277.1.peg.61rxn09997	0.743405		COMMON	fig|243277.1.peg.61	rxn09997	fig|243277.1.peg.61rxn09997	0.743405
COMMON	fig|243277.1.peg.1045	rxn05403	fig|243277.1.peg.1045rxn05403	0.0661665		COMMON	fig|243277.1.peg.1045	rxn05403	fig|243277.1.peg.1045rxn05403	0.0661665
COMMON	fig|243277.1.peg.1045	rxn05378	fig|243277.1.peg.1045rxn05378	0.0661665		COMMON	fig|243277.1.peg.1045	rxn05378	fig|243277.1.peg.1045rxn05378	0.0661665
COMMON	fig|243277.1.peg.1045	rxn05395	fig|243277.1.peg.1045rxn05395	0.0661665		COMMON	fig|243277.1.peg.1045	rxn05395	fig|243277.1.peg.1045rxn05395	0.0661665
COMMON	fig|243277.1.peg.1045	rxn05387	fig|243277.1.peg.1045rxn05387	0.0661665		COMMON	fig|243277.1.peg.1045	rxn05387	fig|243277.1.peg.1045rxn05387	0.0661665
COMMON	fig|243277.1.peg.1045	rxn05362	fig|243277.1.peg.1045rxn05362	0.0661665		COMMON	fig|243277.1.peg.1045	rxn05362	fig|243277.1.peg.1045rxn05362	0.0661665
COMMON	fig|243277.1.peg.1045	rxn05399	fig|243277.1.peg.1045rxn05399	0.0661665		COMMON	fig|243277.1.peg.1045	rxn05399	fig|243277.1.peg.1045rxn05399	0.0661665
COMMON	fig|243277.1.peg.1045	rxn05366	fig|243277.1.peg.1045rxn05366	0.0661665		COMMON	fig|243277.1.peg.1045	rxn05366	fig|243277.1.peg.1045rxn05366	0.0661665
COMMON	fig|243277.1.peg.913	rxn08618	fig|243277.1.peg.913rxn08618	0.00131317		COMMON	fig|243277.1.peg.913	rxn08618	fig|243277.1.peg.913rxn08618	0.00131317
COMMON	fig|243277.1.peg.1224	rxn03538	fig|243277.1.peg.1224rxn03538	0.949239		COMMON	fig|243277.1.peg.1224	rxn03538	fig|243277.1.peg.1224rxn03538	0.949239
COMMON	fig|243277.1.peg.228	rxn01675	fig|243277.1.peg.228rxn01675	0.0144141		COMMON	fig|243277.1.peg.228	rxn01675	fig|243277.1.peg.228rxn01675	0.0144141
COMMON	fig|243277.1.peg.83	rxn10094	fig|243277.1.peg.83rxn10094	0.822053		COMMON	fig|243277.1.peg.83	rxn10094	fig|243277.1.peg.83rxn10094	0.822053
COMMON	fig|243277.1.peg.83	rxn03397	fig|243277.1.peg.83rxn03397	0.822053		COMMON	fig|243277.1.peg.83	rxn03397	fig|243277.1.peg.83rxn03397	0.822053
COMMON	fig|243277.1.peg.1722	rxn00979	fig|243277.1.peg.1722rxn00979	0.05289		COMMON	fig|243277.1.peg.1722	rxn00979	fig|243277.1.peg.1722rxn00979	0.05289
COMMON	fig|243277.1.peg.2221	rxn05406	fig|243277.1.peg.2221rxn05406	0.724668		COMMON	fig|243277.1.peg.2221	rxn05406	fig|243277.1.peg.2221rxn05406	0.724668
COMMON	fig|243277.1.peg.2221	rxn05390	fig|243277.1.peg.2221rxn05390	0.724668		COMMON	fig|243277.1.peg.2221	rxn05390	fig|243277.1.peg.2221rxn05390	0.724668
COMMON	fig|243277.1.peg.2221	rxn05402	fig|243277.1.peg.2221rxn05402	0.724668		COMMON	fig|243277.1.peg.2221	rxn05402	fig|243277.1.peg.2221rxn05402	0.724668
COMMON	fig|243277.1.peg.2221	rxn05386	fig|243277.1.peg.2221rxn05386	0.724668		COMMON	fig|243277.1.peg.2221	rxn05386	fig|243277.1.peg.2221rxn05386	0.724668
COMMON	fig|243277.1.peg.2221	rxn05394	fig|243277.1.peg.2221rxn05394	0.724668		COMMON	fig|243277.1.peg.2221	rxn05394	fig|243277.1.peg.2221rxn05394	0.724668
COMMON	fig|243277.1.peg.2221	rxn05377	fig|243277.1.peg.2221rxn05377	0.724668		COMMON	fig|243277.1.peg.2221	rxn05377	fig|243277.1.peg.2221rxn05377	0.724668
COMMON	fig|243277.1.peg.2221	rxn05398	fig|243277.1.peg.2221rxn05398	0.724668		COMMON	fig|243277.1.peg.2221	rxn05398	fig|243277.1.peg.2221rxn05398	0.724668
COMMON	fig|243277.1.peg.2221	rxn05381	fig|243277.1.peg.2221rxn05381	0.724668		COMMON	fig|243277.1.peg.2221	rxn05381	fig|243277.1.peg.2221rxn05381	0.724668
COMMON	fig|243277.1.peg.2221	rxn05373	fig|243277.1.peg.2221rxn05373	0.724668		COMMON	fig|243277.1.peg.2221	rxn05373	fig|243277.1.peg.2221rxn05373	0.724668
COMMON	fig|243277.1.peg.2221	rxn05365	fig|243277.1.peg.2221rxn05365	0.724668		COMMON	fig|243277.1.peg.2221	rxn05365	fig|243277.1.peg.2221rxn05365	0.724668
COMMON	fig|243277.1.peg.2221	rxn05369	fig|243277.1.peg.2221rxn05369	0.724668		COMMON	fig|243277.1.peg.2221	rxn05369	fig|243277.1.peg.2221rxn05369	0.724668
COMMON	fig|243277.1.peg.2221	rxn05361	fig|243277.1.peg.2221rxn05361	0.724668		COMMON	fig|243277.1.peg.2221	rxn05361	fig|243277.1.peg.2221rxn05361	0.724668
COMMON	fig|243277.1.peg.2230	rxn00119	fig|243277.1.peg.2230rxn00119	0.959171		COMMON	fig|243277.1.peg.2230	rxn00119	fig|243277.1.peg.2230rxn00119	0.959171
COMMON	fig|243277.1.peg.1949	rxn11703	fig|243277.1.peg.1949rxn11703	0.864282		COMMON	fig|243277.1.peg.1949	rxn11703	fig|243277.1.peg.1949rxn11703	0.864282
COMMON	fig|243277.1.peg.3901	rxn03167	fig|243277.1.peg.3901rxn03167	0.786826		COMMON	fig|243277.1.peg.3901	rxn03167	fig|243277.1.peg.3901rxn03167	0.786826
COMMON	fig|243277.1.peg.1565	rxn02270	fig|243277.1.peg.1565rxn02270	0.0680327		COMMON	fig|243277.1.peg.1565	rxn02270	fig|243277.1.peg.1565rxn02270	0.0680327
COMMON	fig|243277.1.peg.2362	rxn02929	fig|243277.1.peg.2362rxn02929	0.409988		COMMON	fig|243277.1.peg.2362	rxn02929	fig|243277.1.peg.2362rxn02929	0.409988
COMMON	fig|266834.1.peg.5708	rxn03919	fig|266834.1.peg.5708rxn03919	0.00584056		COMMON	fig|266834.1.peg.5708	rxn03919	fig|266834.1.peg.5708rxn03919	0.00584056
COMMON	fig|266834.1.peg.1658	rxn10094	fig|266834.1.peg.1658rxn10094	0.825517		COMMON	fig|266834.1.peg.1658	rxn10094	fig|266834.1.peg.1658rxn10094	0.825517
COMMON	fig|266834.1.peg.1658	rxn03397	fig|266834.1.peg.1658rxn03397	0.825517		COMMON	fig|266834.1.peg.1658	rxn03397	fig|266834.1.peg.1658rxn03397	0.825517
COMMON	fig|266834.1.peg.2334	rxn03919	fig|266834.1.peg.2334rxn03919	0.00578445		COMMON	fig|266834.1.peg.2334	rxn03919	fig|266834.1.peg.2334rxn03919	0.00578445
COMMON	fig|266834.1.peg.4775	rxn01644	fig|266834.1.peg.4775rxn01644	0.0300075		COMMON	fig|266834.1.peg.4775	rxn01644	fig|266834.1.peg.4775rxn01644	0.0300075
COMMON	fig|266834.1.peg.2791	rxn00119	fig|266834.1.peg.2791rxn00119	0.973564		COMMON	fig|266834.1.peg.2791	rxn00119	fig|266834.1.peg.2791rxn00119	0.973564
COMMON	fig|266834.1.peg.2865	rxn08618	fig|266834.1.peg.2865rxn08618	0.1201		COMMON	fig|266834.1.peg.2865	rxn08618	fig|266834.1.peg.2865rxn08618	0.1201
COMMON	fig|266834.1.peg.2864	rxn08583	fig|266834.1.peg.2864rxn08583	0.00291147		COMMON	fig|266834.1.peg.2864	rxn08583	fig|266834.1.peg.2864rxn08583	0.00291147
COMMON	fig|266834.1.peg.1308	rxn00979	fig|266834.1.peg.1308rxn00979	0.110725		COMMON	fig|266834.1.peg.1308	rxn00979	fig|266834.1.peg.1308rxn00979	0.110725
COMMON	fig|266834.1.peg.1455	rxn02929	fig|266834.1.peg.1455rxn02929	0.357143		COMMON	fig|266834.1.peg.1455	rxn02929	fig|266834.1.peg.1455rxn02929	0.357143
COMMON	fig|266834.1.peg.437	rxn00979	fig|266834.1.peg.437rxn00979	0.110526		COMMON	fig|266834.1.peg.437	rxn00979	fig|266834.1.peg.437rxn00979	0.110526
COMMON	fig|266834.1.peg.5292	rxn08713	fig|266834.1.peg.5292rxn08713	0.108811		COMMON	fig|266834.1.peg.5292	rxn08713	fig|266834.1.peg.5292rxn08713	0.108811
COMMON	fig|266834.1.peg.6092	rxn03030	fig|266834.1.peg.6092rxn03030	0.143993		COMMON	fig|266834.1.peg.6092	rxn03030	fig|266834.1.peg.6092rxn03030	0.143993
COMMON	fig|266834.1.peg.4870	rxn03511	fig|266834.1.peg.4870rxn03511	0.00238984		COMMON	fig|266834.1.peg.4870	rxn03511	fig|266834.1.peg.4870rxn03511	0.00238984
COMMON	fig|266834.1.peg.3179	rxn03538	fig|266834.1.peg.3179rxn03538	0.936247		COMMON	fig|266834.1.peg.3179	rxn03538	fig|266834.1.peg.3179rxn03538	0.936247
COMMON	fig|266834.1.peg.6008	rxn05104	fig|266834.1.peg.6008rxn05104	0.172526		COMMON	fig|266834.1.peg.6008	rxn05104	fig|266834.1.peg.6008rxn05104	0.172526
COMMON	fig|266834.1.peg.5486	rxn00979	fig|266834.1.peg.5486rxn00979	0.108046		COMMON	fig|266834.1.peg.5486	rxn00979	fig|266834.1.peg.5486rxn00979	0.108046
COMMON	fig|266834.1.peg.5180	rxn08954	fig|266834.1.peg.5180rxn08954	0.118594		COMMON	fig|266834.1.peg.5180	rxn08954	fig|266834.1.peg.5180rxn08954	0.118594
COMMON	fig|266834.1.peg.5200	rxn03030	fig|266834.1.peg.5200rxn03030	0.136316		COMMON	fig|266834.1.peg.5200	rxn03030	fig|266834.1.peg.5200rxn03030	0.136316
COMMON	fig|266834.1.peg.6162	rxn09997	fig|266834.1.peg.6162rxn09997	0.743405		COMMON	fig|266834.1.peg.6162	rxn09997	fig|266834.1.peg.6162rxn09997	0.743405
COMMON	fig|266834.1.peg.1849	rxn03086	fig|266834.1.peg.1849rxn03086	0.170018		COMMON	fig|266834.1.peg.1849	rxn03086	fig|266834.1.peg.1849rxn03086	0.170018
COMMON	fig|266834.1.peg.279	rxn03150	fig|266834.1.peg.279rxn03150	0.327475		COMMON	fig|266834.1.peg.279	rxn03150	fig|266834.1.peg.279rxn03150	0.327475
COMMON	fig|266834.1.peg.4868	rxn08713	fig|266834.1.peg.4868rxn08713	0.0909723		COMMON	fig|266834.1.peg.4868	rxn08713	fig|266834.1.peg.4868rxn08713	0.0909723
COMMON	fig|266834.1.peg.5282	rxn08619	fig|266834.1.peg.5282rxn08619	0.218001		COMMON	fig|266834.1.peg.5282	rxn08619	fig|266834.1.peg.5282rxn08619	0.218001
COMMON	fig|266834.1.peg.5282	rxn08620	fig|266834.1.peg.5282rxn08620	0.152679		COMMON	fig|266834.1.peg.5282	rxn08620	fig|266834.1.peg.5282rxn08620	0.152679
COMMON	fig|266834.1.peg.5321	rxn02832	fig|266834.1.peg.5321rxn02832	0.0197332		COMMON	fig|266834.1.peg.5321	rxn02832	fig|266834.1.peg.5321rxn02832	0.0197332
COMMON	fig|266834.1.peg.2798	rxn05406	fig|266834.1.peg.2798rxn05406	0.816663		COMMON	fig|266834.1.peg.2798	rxn05406	fig|266834.1.peg.2798rxn05406	0.816663
COMMON	fig|266834.1.peg.2798	rxn05390	fig|266834.1.peg.2798rxn05390	0.816663		COMMON	fig|266834.1.peg.2798	rxn05390	fig|266834.1.peg.2798rxn05390	0.816663
COMMON	fig|266834.1.peg.2798	rxn05402	fig|266834.1.peg.2798rxn05402	0.816663		COMMON	fig|266834.1.peg.2798	rxn05402	fig|266834.1.peg.2798rxn05402	0.816663
COMMON	fig|266834.1.peg.2798	rxn05386	fig|266834.1.peg.2798rxn05386	0.816663		COMMON	fig|266834.1.peg.2798	rxn05386	fig|266834.1.peg.2798rxn05386	0.816663
COMMON	fig|266834.1.peg.2798	rxn05394	fig|266834.1.peg.2798rxn05394	0.816663		COMMON	fig|266834.1.peg.2798	rxn05394	fig|266834.1.peg.2798rxn05394	0.816663
COMMON	fig|266834.1.peg.2798	rxn05377	fig|266834.1.peg.2798rxn05377	0.816663		COMMON	fig|266834.1.peg.2798	rxn05377	fig|266834.1.peg.2798rxn05377	0.816663
COMMON	fig|266834.1.peg.2798	rxn05398	fig|266834.1.peg.2798rxn05398	0.816663		COMMON	fig|266834.1.peg.2798	rxn05398	fig|266834.1.peg.2798rxn05398	0.816663
COMMON	fig|266834.1.peg.2798	rxn05381	fig|266834.1.peg.2798rxn05381	0.816663		COMMON	fig|266834.1.peg.2798	rxn05381	fig|266834.1.peg.2798rxn05381	0.816663
COMMON	fig|266834.1.peg.2798	rxn05373	fig|266834.1.peg.2798rxn05373	0.816663		COMMON	fig|266834.1.peg.2798	rxn05373	fig|266834.1.peg.2798rxn05373	0.816663
COMMON	fig|266834.1.peg.2798	rxn05369	fig|266834.1.peg.2798rxn05369	0.816663		COMMON	fig|266834.1.peg.2798	rxn05369	fig|266834.1.peg.2798rxn05369	0.816663
COMMON	fig|266834.1.peg.2798	rxn05462	fig|266834.1.peg.2798rxn05462	0.816663		COMMON	fig|266834.1.peg.2798	rxn05462	fig|266834.1.peg.2798rxn05462	0.816663
COMMON	fig|266834.1.peg.2798	rxn05365	fig|266834.1.peg.2798rxn05365	0.816663		COMMON	fig|266834.1.peg.2798	rxn05365	fig|266834.1.peg.2798rxn05365	0.816663
COMMON	fig|266834.1.peg.2798	rxn05361	fig|266834.1.peg.2798rxn05361	0.816663		COMMON	fig|266834.1.peg.2798	rxn05361	fig|266834.1.peg.2798rxn05361	0.816663
COMMON	fig|267608.1.peg.1749	rxn02831	fig|267608.1.peg.1749rxn02831	0.0208721		COMMON	fig|267608.1.peg.1749	rxn02831	fig|267608.1.peg.1749rxn02831	0.0208721
COMMON	fig|267608.1.peg.2745	rxn02929	fig|267608.1.peg.2745rxn02929	0.388889		COMMON	fig|267608.1.peg.2745	rxn02929	fig|267608.1.peg.2745rxn02929	0.388889
COMMON	fig|267608.1.peg.665	rxn01644	fig|267608.1.peg.665rxn01644	0.0241556		COMMON	fig|267608.1.peg.665	rxn01644	fig|267608.1.peg.665rxn01644	0.0241556
COMMON	fig|267608.1.peg.458	rxn10094	fig|267608.1.peg.458rxn10094	0.85835		COMMON	fig|267608.1.peg.458	rxn10094	fig|267608.1.peg.458rxn10094	0.85835
COMMON	fig|267608.1.peg.458	rxn03397	fig|267608.1.peg.458rxn03397	0.85835		COMMON	fig|267608.1.peg.458	rxn03397	fig|267608.1.peg.458rxn03397	0.85835
COMMON	fig|267608.1.peg.1415	rxn05406	fig|267608.1.peg.1415rxn05406	0.726548		COMMON	fig|267608.1.peg.1415	rxn05406	fig|267608.1.peg.1415rxn05406	0.726548
COMMON	fig|267608.1.peg.1415	rxn05390	fig|267608.1.peg.1415rxn05390	0.726548		COMMON	fig|267608.1.peg.1415	rxn05390	fig|267608.1.peg.1415rxn05390	0.726548
COMMON	fig|267608.1.peg.1415	rxn05402	fig|267608.1.peg.1415rxn05402	0.726548		COMMON	fig|267608.1.peg.1415	rxn05402	fig|267608.1.peg.1415rxn05402	0.726548
COMMON	fig|267608.1.peg.1415	rxn05386	fig|267608.1.peg.1415rxn05386	0.726548		COMMON	fig|267608.1.peg.1415	rxn05386	fig|267608.1.peg.1415rxn05386	0.726548
COMMON	fig|267608.1.peg.1415	rxn05394	fig|267608.1.peg.1415rxn05394	0.726548		COMMON	fig|267608.1.peg.1415	rxn05394	fig|267608.1.peg.1415rxn05394	0.726548
COMMON	fig|267608.1.peg.1415	rxn05377	fig|267608.1.peg.1415rxn05377	0.726548		COMMON	fig|267608.1.peg.1415	rxn05377	fig|267608.1.peg.1415rxn05377	0.726548
COMMON	fig|267608.1.peg.1415	rxn05398	fig|267608.1.peg.1415rxn05398	0.726548		COMMON	fig|267608.1.peg.1415	rxn05398	fig|267608.1.peg.1415rxn05398	0.726548
COMMON	fig|267608.1.peg.1415	rxn05381	fig|267608.1.peg.1415rxn05381	0.726548		COMMON	fig|267608.1.peg.1415	rxn05381	fig|267608.1.peg.1415rxn05381	0.726548
COMMON	fig|267608.1.peg.1415	rxn05373	fig|267608.1.peg.1415rxn05373	0.726548		COMMON	fig|267608.1.peg.1415	rxn05373	fig|267608.1.peg.1415rxn05373	0.726548
COMMON	fig|267608.1.peg.1415	rxn05365	fig|267608.1.peg.1415rxn05365	0.726548		COMMON	fig|267608.1.peg.1415	rxn05365	fig|267608.1.peg.1415rxn05365	0.726548
COMMON	fig|267608.1.peg.1415	rxn05331	fig|267608.1.peg.1415rxn05331	0.726548		COMMON	fig|267608.1.peg.1415	rxn05331	fig|267608.1.peg.1415rxn05331	0.726548
COMMON	fig|267608.1.peg.1415	rxn05333	fig|267608.1.peg.1415rxn05333	0.726548		COMMON	fig|267608.1.peg.1415	rxn05333	fig|267608.1.peg.1415rxn05333	0.726548
COMMON	fig|267608.1.peg.1415	rxn05369	fig|267608.1.peg.1415rxn05369	0.726548		COMMON	fig|267608.1.peg.1415	rxn05369	fig|267608.1.peg.1415rxn05369	0.726548
COMMON	fig|267608.1.peg.1415	rxn05361	fig|267608.1.peg.1415rxn05361	0.726548		COMMON	fig|267608.1.peg.1415	rxn05361	fig|267608.1.peg.1415rxn05361	0.726548
COMMON	fig|267608.1.peg.3665	rxn02898	fig|267608.1.peg.3665rxn02898	0.131077		COMMON	fig|267608.1.peg.3665	rxn02898	fig|267608.1.peg.3665rxn02898	0.131077
COMMON	fig|267608.1.peg.1406	rxn00119	fig|267608.1.peg.1406rxn00119	0.976446		COMMON	fig|267608.1.peg.1406	rxn00119	fig|267608.1.peg.1406rxn00119	0.976446
COMMON	fig|267608.1.peg.113	rxn09997	fig|267608.1.peg.113rxn09997	0.719424		COMMON	fig|267608.1.peg.113	rxn09997	fig|267608.1.peg.113rxn09997	0.719424
COMMON	fig|267608.1.peg.2396	rxn03538	fig|267608.1.peg.2396rxn03538	0.947984		COMMON	fig|267608.1.peg.2396	rxn03538	fig|267608.1.peg.2396rxn03538	0.947984
COMMON	fig|267608.1.peg.4119	rxn00313	fig|267608.1.peg.4119rxn00313	0.805733		COMMON	fig|267608.1.peg.4119	rxn00313	fig|267608.1.peg.4119rxn00313	0.805733
COMMON	fig|267608.1.peg.28	rxn00979	fig|267608.1.peg.28rxn00979	0.0817194		COMMON	fig|267608.1.peg.28	rxn00979	fig|267608.1.peg.28rxn00979	0.0817194
COMMON	fig|269483.3.peg.7540	rxn10094	fig|269483.3.peg.7540rxn10094	0.853059		COMMON	fig|269483.3.peg.7540	rxn10094	fig|269483.3.peg.7540rxn10094	0.853059
COMMON	fig|269483.3.peg.7540	rxn03397	fig|269483.3.peg.7540rxn03397	0.853059		COMMON	fig|269483.3.peg.7540	rxn03397	fig|269483.3.peg.7540rxn03397	0.853059
COMMON	fig|269483.3.peg.6655	rxn05406	fig|269483.3.peg.6655rxn05406	0.728723		COMMON	fig|269483.3.peg.6655	rxn05406	fig|269483.3.peg.6655rxn05406	0.728723
COMMON	fig|269483.3.peg.6655	rxn05390	fig|269483.3.peg.6655rxn05390	0.728723		COMMON	fig|269483.3.peg.6655	rxn05390	fig|269483.3.peg.6655rxn05390	0.728723
COMMON	fig|269483.3.peg.6655	rxn05402	fig|269483.3.peg.6655rxn05402	0.728723		COMMON	fig|269483.3.peg.6655	rxn05402	fig|269483.3.peg.6655rxn05402	0.728723
COMMON	fig|269483.3.peg.6655	rxn05386	fig|269483.3.peg.6655rxn05386	0.728723		COMMON	fig|269483.3.peg.6655	rxn05386	fig|269483.3.peg.6655rxn05386	0.728723
COMMON	fig|269483.3.peg.6655	rxn05394	fig|269483.3.peg.6655rxn05394	0.728723		COMMON	fig|269483.3.peg.6655	rxn05394	fig|269483.3.peg.6655rxn05394	0.728723
COMMON	fig|269483.3.peg.6655	rxn05377	fig|269483.3.peg.6655rxn05377	0.728723		COMMON	fig|269483.3.peg.6655	rxn05377	fig|269483.3.peg.6655rxn05377	0.728723
COMMON	fig|269483.3.peg.6655	rxn05398	fig|269483.3.peg.6655rxn05398	0.728723		COMMON	fig|269483.3.peg.6655	rxn05398	fig|269483.3.peg.6655rxn05398	0.728723
COMMON	fig|269483.3.peg.6655	rxn05381	fig|269483.3.peg.6655rxn05381	0.728723		COMMON	fig|269483.3.peg.6655	rxn05381	fig|269483.3.peg.6655rxn05381	0.728723
COMMON	fig|269483.3.peg.6655	rxn05373	fig|269483.3.peg.6655rxn05373	0.728723		COMMON	fig|269483.3.peg.6655	rxn05373	fig|269483.3.peg.6655rxn05373	0.728723
COMMON	fig|269483.3.peg.6655	rxn05369	fig|269483.3.peg.6655rxn05369	0.728723		COMMON	fig|269483.3.peg.6655	rxn05369	fig|269483.3.peg.6655rxn05369	0.728723
COMMON	fig|269483.3.peg.6655	rxn05462	fig|269483.3.peg.6655rxn05462	0.728723		COMMON	fig|269483.3.peg.6655	rxn05462	fig|269483.3.peg.6655rxn05462	0.728723
COMMON	fig|269483.3.peg.6655	rxn05365	fig|269483.3.peg.6655rxn05365	0.728723		COMMON	fig|269483.3.peg.6655	rxn05365	fig|269483.3.peg.6655rxn05365	0.728723
COMMON	fig|269483.3.peg.6655	rxn05361	fig|269483.3.peg.6655rxn05361	0.728723		COMMON	fig|269483.3.peg.6655	rxn05361	fig|269483.3.peg.6655rxn05361	0.728723
COMMON	fig|269483.3.peg.960	rxn02898	fig|269483.3.peg.960rxn02898	0.248162		COMMON	fig|269483.3.peg.960	rxn02898	fig|269483.3.peg.960rxn02898	0.248162
COMMON	fig|269483.3.peg.5378	rxn02929	fig|269483.3.peg.5378rxn02929	0.394844		COMMON	fig|269483.3.peg.5378	rxn02929	fig|269483.3.peg.5378rxn02929	0.394844
COMMON	fig|269483.3.peg.3845	rxn02304	fig|269483.3.peg.3845rxn02304	0.000188018		COMMON	fig|269483.3.peg.3845	rxn02304	fig|269483.3.peg.3845rxn02304	0.000188018
COMMON	fig|269483.3.peg.5433	rxn09997	fig|269483.3.peg.5433rxn09997	0.739408		COMMON	fig|269483.3.peg.5433	rxn09997	fig|269483.3.peg.5433rxn09997	0.739408
COMMON	fig|269483.3.peg.2310	rxn08618	fig|269483.3.peg.2310rxn08618	0.195514		COMMON	fig|269483.3.peg.2310	rxn08618	fig|269483.3.peg.2310rxn08618	0.195514
COMMON	fig|269483.3.peg.4360	rxn01644	fig|269483.3.peg.4360rxn01644	0.532968		COMMON	fig|269483.3.peg.4360	rxn01644	fig|269483.3.peg.4360rxn01644	0.532968
COMMON	fig|269483.3.peg.201	rxn01258	fig|269483.3.peg.201rxn01258	0.68718		COMMON	fig|269483.3.peg.201	rxn01258	fig|269483.3.peg.201rxn01258	0.68718
COMMON	fig|269483.3.peg.3164	rxn02832	fig|269483.3.peg.3164rxn02832	0.0195953		COMMON	fig|269483.3.peg.3164	rxn02832	fig|269483.3.peg.3164rxn02832	0.0195953
COMMON	fig|269483.3.peg.6670	rxn00119	fig|269483.3.peg.6670rxn00119	0.976659		COMMON	fig|269483.3.peg.6670	rxn00119	fig|269483.3.peg.6670rxn00119	0.976659
COMMON	fig|269483.3.peg.4798	rxn03030	fig|269483.3.peg.4798rxn03030	0.237475		COMMON	fig|269483.3.peg.4798	rxn03030	fig|269483.3.peg.4798rxn03030	0.237475
COMMON	fig|269483.3.peg.6968	rxn03538	fig|269483.3.peg.6968rxn03538	0.947716		COMMON	fig|269483.3.peg.6968	rxn03538	fig|269483.3.peg.6968rxn03538	0.947716
COMMON	fig|272626.1.peg.1102	rxn03538	fig|272626.1.peg.1102rxn03538	0.903661		COMMON	fig|272626.1.peg.1102	rxn03538	fig|272626.1.peg.1102rxn03538	0.903661
COMMON	fig|272626.1.peg.1653	rxn09106	fig|272626.1.peg.1653rxn09106	0.504746		COMMON	fig|272626.1.peg.1653	rxn09106	fig|272626.1.peg.1653rxn09106	0.504746
COMMON	fig|272626.1.peg.1653	rxn10265	fig|272626.1.peg.1653rxn10265	0.504746		COMMON	fig|272626.1.peg.1653	rxn10265	fig|272626.1.peg.1653rxn10265	0.504746
COMMON	fig|272626.1.peg.1653	rxn10266	fig|272626.1.peg.1653rxn10266	0.504746		COMMON	fig|272626.1.peg.1653	rxn10266	fig|272626.1.peg.1653rxn10266	0.504746
COMMON	fig|272626.1.peg.2650	rxn05406	fig|272626.1.peg.2650rxn05406	0.759174		COMMON	fig|272626.1.peg.2650	rxn05406	fig|272626.1.peg.2650rxn05406	0.759174
COMMON	fig|272626.1.peg.2650	rxn05369	fig|272626.1.peg.2650rxn05369	0.759174		COMMON	fig|272626.1.peg.2650	rxn05369	fig|272626.1.peg.2650rxn05369	0.759174
COMMON	fig|272626.1.peg.2650	rxn05402	fig|272626.1.peg.2650rxn05402	0.759174		COMMON	fig|272626.1.peg.2650	rxn05402	fig|272626.1.peg.2650rxn05402	0.759174
COMMON	fig|272626.1.peg.2650	rxn05386	fig|272626.1.peg.2650rxn05386	0.759174		COMMON	fig|272626.1.peg.2650	rxn05386	fig|272626.1.peg.2650rxn05386	0.759174
COMMON	fig|272626.1.peg.2650	rxn05381	fig|272626.1.peg.2650rxn05381	0.759174		COMMON	fig|272626.1.peg.2650	rxn05381	fig|272626.1.peg.2650rxn05381	0.759174
COMMON	fig|272626.1.peg.2650	rxn05398	fig|272626.1.peg.2650rxn05398	0.759174		COMMON	fig|272626.1.peg.2650	rxn05398	fig|272626.1.peg.2650rxn05398	0.759174
COMMON	fig|272626.1.peg.2650	rxn05377	fig|272626.1.peg.2650rxn05377	0.759174		COMMON	fig|272626.1.peg.2650	rxn05377	fig|272626.1.peg.2650rxn05377	0.759174
COMMON	fig|272626.1.peg.2650	rxn05361	fig|272626.1.peg.2650rxn05361	0.759174		COMMON	fig|272626.1.peg.2650	rxn05361	fig|272626.1.peg.2650rxn05361	0.759174
COMMON	fig|272626.1.peg.2650	rxn05373	fig|272626.1.peg.2650rxn05373	0.759174		COMMON	fig|272626.1.peg.2650	rxn05373	fig|272626.1.peg.2650rxn05373	0.759174
COMMON	fig|272626.1.peg.2650	rxn05365	fig|272626.1.peg.2650rxn05365	0.759174		COMMON	fig|272626.1.peg.2650	rxn05365	fig|272626.1.peg.2650rxn05365	0.759174
COMMON	fig|272626.1.peg.2650	rxn05394	fig|272626.1.peg.2650rxn05394	0.759174		COMMON	fig|272626.1.peg.2650	rxn05394	fig|272626.1.peg.2650rxn05394	0.759174
COMMON	fig|272626.1.peg.2650	rxn05390	fig|272626.1.peg.2650rxn05390	0.759174		COMMON	fig|272626.1.peg.2650	rxn05390	fig|272626.1.peg.2650rxn05390	0.759174
COMMON	fig|272626.1.peg.1771	rxn11703	fig|272626.1.peg.1771rxn11703	0.884001		COMMON	fig|272626.1.peg.1771	rxn11703	fig|272626.1.peg.1771rxn11703	0.884001
COMMON	fig|272626.1.peg.1064	rxn10291	fig|272626.1.peg.1064rxn10291	0.563389		COMMON	fig|272626.1.peg.1064	rxn10291	fig|272626.1.peg.1064rxn10291	0.563389
COMMON	fig|272626.1.peg.1064	rxn10292	fig|272626.1.peg.1064rxn10292	0.563389		COMMON	fig|272626.1.peg.1064	rxn10292	fig|272626.1.peg.1064rxn10292	0.563389
COMMON	fig|272626.1.peg.1064	rxn10293	fig|272626.1.peg.1064rxn10293	0.563389		COMMON	fig|272626.1.peg.1064	rxn10293	fig|272626.1.peg.1064rxn10293	0.563389
COMMON	fig|272626.1.peg.1774	rxn08333	fig|272626.1.peg.1774rxn08333	0.530663		COMMON	fig|272626.1.peg.1774	rxn08333	fig|272626.1.peg.1774rxn08333	0.530663
COMMON	fig|272626.1.peg.1162	rxn05029	fig|272626.1.peg.1162rxn05029	0.983956		COMMON	fig|272626.1.peg.1162	rxn05029	fig|272626.1.peg.1162rxn05029	0.983956
COMMON	fig|272626.1.peg.1339	rxn00119	fig|272626.1.peg.1339rxn00119	0.984871		COMMON	fig|272626.1.peg.1339	rxn00119	fig|272626.1.peg.1339rxn00119	0.984871
COMMON	fig|272626.1.peg.211	rxn10232	fig|272626.1.peg.211rxn10232	0.415187		COMMON	fig|272626.1.peg.211	rxn10232	fig|272626.1.peg.211rxn10232	0.415187
COMMON	fig|272626.1.peg.211	rxn10233	fig|272626.1.peg.211rxn10233	0.415187		COMMON	fig|272626.1.peg.211	rxn10233	fig|272626.1.peg.211rxn10233	0.415187
COMMON	fig|272626.1.peg.211	rxn09202	fig|272626.1.peg.211rxn09202	0.415187		COMMON	fig|272626.1.peg.211	rxn09202	fig|272626.1.peg.211rxn09202	0.415187
COMMON	fig|272626.1.peg.360	rxn05040	fig|272626.1.peg.360rxn05040	0.00638767		COMMON	fig|272626.1.peg.360	rxn05040	fig|272626.1.peg.360rxn05040	0.00638767
COMMON	fig|272626.1.peg.802	rxn00102	fig|272626.1.peg.802rxn00102	0.895579		COMMON	fig|272626.1.peg.802	rxn00102	fig|272626.1.peg.802rxn00102	0.895579
COMMON	fig|272626.1.peg.2008	rxn02929	fig|272626.1.peg.2008rxn02929	0.244225		COMMON	fig|272626.1.peg.2008	rxn02929	fig|272626.1.peg.2008rxn02929	0.244225
COMMON	fig|272626.1.peg.906	rxn00979	fig|272626.1.peg.906rxn00979	0.0641758		COMMON	fig|272626.1.peg.906	rxn00979	fig|272626.1.peg.906rxn00979	0.0641758
COMMON	fig|272626.1.peg.1490	rxn08299	fig|272626.1.peg.1490rxn08299	0.956239		COMMON	fig|272626.1.peg.1490	rxn08299	fig|272626.1.peg.1490rxn08299	0.956239
COMMON	fig|272626.1.peg.1490	rxn10254	fig|272626.1.peg.1490rxn10254	0.956239		COMMON	fig|272626.1.peg.1490	rxn10254	fig|272626.1.peg.1490rxn10254	0.956239
COMMON	fig|272626.1.peg.1118	rxn05029	fig|272626.1.peg.1118rxn05029	0.95869		COMMON	fig|272626.1.peg.1118	rxn05029	fig|272626.1.peg.1118rxn05029	0.95869
COMMON	fig|272626.1.peg.1050	rxn00250	fig|272626.1.peg.1050rxn00250	0.803357		COMMON	fig|272626.1.peg.1050	rxn00250	fig|272626.1.peg.1050rxn00250	0.803357
COMMON	fig|272626.1.peg.2773	rxn03167	fig|272626.1.peg.2773rxn03167	0.780596		COMMON	fig|272626.1.peg.2773	rxn03167	fig|272626.1.peg.2773rxn03167	0.780596
COMMON	fig|272626.1.peg.2112	rxn09106	fig|272626.1.peg.2112rxn09106	0.567437		COMMON	fig|272626.1.peg.2112	rxn09106	fig|272626.1.peg.2112rxn09106	0.567437
COMMON	fig|272626.1.peg.2112	rxn10265	fig|272626.1.peg.2112rxn10265	0.567437		COMMON	fig|272626.1.peg.2112	rxn10265	fig|272626.1.peg.2112rxn10265	0.567437
COMMON	fig|272626.1.peg.2112	rxn10266	fig|272626.1.peg.2112rxn10266	0.567437		COMMON	fig|272626.1.peg.2112	rxn10266	fig|272626.1.peg.2112rxn10266	0.567437
COMMON	fig|272626.1.peg.1463	rxn01644	fig|272626.1.peg.1463rxn01644	0.0341599		COMMON	fig|272626.1.peg.1463	rxn01644	fig|272626.1.peg.1463rxn01644	0.0341599
COMMON	fig|272626.1.peg.816	rxn01501	fig|272626.1.peg.816rxn01501	0.979279		COMMON	fig|272626.1.peg.816	rxn01501	fig|272626.1.peg.816rxn01501	0.979279
COMMON	fig|272626.1.peg.1810	rxn00623	fig|272626.1.peg.1810rxn00623	0.00756582		COMMON	fig|272626.1.peg.1810	rxn00623	fig|272626.1.peg.1810rxn00623	0.00756582
COMMON	fig|272626.1.peg.2682	rxn10193	fig|272626.1.peg.2682rxn10193	0.0103191		COMMON	fig|272626.1.peg.2682	rxn10193	fig|272626.1.peg.2682rxn10193	0.0103191
COMMON	fig|272626.1.peg.2682	rxn10302	fig|272626.1.peg.2682rxn10302	0.0103191		COMMON	fig|272626.1.peg.2682	rxn10302	fig|272626.1.peg.2682rxn10302	0.0103191
COMMON	fig|272626.1.peg.2682	rxn10300	fig|272626.1.peg.2682rxn10300	0.0103191		COMMON	fig|272626.1.peg.2682	rxn10300	fig|272626.1.peg.2682rxn10300	0.0103191
COMMON	fig|272626.1.peg.2682	rxn10301	fig|272626.1.peg.2682rxn10301	0.0103191		COMMON	fig|272626.1.peg.2682	rxn10301	fig|272626.1.peg.2682rxn10301	0.0103191
COMMON	fig|272635.1.peg.548	rxn00122	fig|272635.1.peg.548rxn00122	0.899966		COMMON	fig|272635.1.peg.548	rxn00122	fig|272635.1.peg.548rxn00122	0.899966
COMMON	fig|272635.1.peg.718	rxn09310	fig|272635.1.peg.718rxn09310	0.779473		COMMON	fig|272635.1.peg.718	rxn09310	fig|272635.1.peg.718rxn09310	0.779473
COMMON	fig|272635.1.peg.597	rxn00710	fig|272635.1.peg.597rxn00710	0.000169785		COMMON	fig|272635.1.peg.597	rxn00710	fig|272635.1.peg.597rxn00710	0.000169785
COMMON	fig|272635.1.peg.120	rxn00283	fig|272635.1.peg.120rxn00283	0.00204428		COMMON	fig|272635.1.peg.120	rxn00283	fig|272635.1.peg.120rxn00283	0.00204428
COMMON	fig|272635.1.peg.220	rxn00119	fig|272635.1.peg.220rxn00119	0.977018		COMMON	fig|272635.1.peg.220	rxn00119	fig|272635.1.peg.220rxn00119	0.977018
COMMON	fig|272635.1.peg.172	rxn09310	fig|272635.1.peg.172rxn09310	0.0522025		COMMON	fig|272635.1.peg.172	rxn09310	fig|272635.1.peg.172rxn09310	0.0522025
COMMON	fig|272635.1.peg.173	rxn09310	fig|272635.1.peg.173rxn09310	0.0509315		COMMON	fig|272635.1.peg.173	rxn09310	fig|272635.1.peg.173rxn09310	0.0509315
COMMON	fig|272635.1.peg.772	rxn01790	fig|272635.1.peg.772rxn01790	0.00595339		COMMON	fig|272635.1.peg.772	rxn01790	fig|272635.1.peg.772rxn01790	0.00595339
COMMON	fig|272635.1.peg.155	rxn05528	fig|272635.1.peg.155rxn05528	0.306052		COMMON	fig|272635.1.peg.155	rxn05528	fig|272635.1.peg.155rxn05528	0.306052
COMMON	fig|272635.1.peg.740	rxn01538	fig|272635.1.peg.740rxn01538	0.149796		COMMON	fig|272635.1.peg.740	rxn01538	fig|272635.1.peg.740rxn01538	0.149796
COMMON	fig|316407.3.peg.201	rxn10094	fig|316407.3.peg.201rxn10094	0.729096		COMMON	fig|316407.3.peg.201	rxn10094	fig|316407.3.peg.201rxn10094	0.729096
COMMON	fig|316407.3.peg.201	rxn03397	fig|316407.3.peg.201rxn03397	0.729096		COMMON	fig|316407.3.peg.201	rxn03397	fig|316407.3.peg.201rxn03397	0.729096
COMMON	fig|316407.3.peg.3215	rxn08333	fig|316407.3.peg.3215rxn08333	0.556595		COMMON	fig|316407.3.peg.3215	rxn08333	fig|316407.3.peg.3215rxn08333	0.556595
COMMON	fig|316407.3.peg.307	rxn02270	fig|316407.3.peg.307rxn02270	0.593386		COMMON	fig|316407.3.peg.307	rxn02270	fig|316407.3.peg.307rxn02270	0.593386
COMMON	fig|316407.3.peg.3501	rxn08620	fig|316407.3.peg.3501rxn08620	0.124471		COMMON	fig|316407.3.peg.3501	rxn08620	fig|316407.3.peg.3501rxn08620	0.124471
COMMON	fig|316407.3.peg.3500	rxn08619	fig|316407.3.peg.3500rxn08619	0.591035		COMMON	fig|316407.3.peg.3500	rxn08619	fig|316407.3.peg.3500rxn08619	0.591035
COMMON	fig|316407.3.peg.3160	rxn09997	fig|316407.3.peg.3160rxn09997	0.751399		COMMON	fig|316407.3.peg.3160	rxn09997	fig|316407.3.peg.3160rxn09997	0.751399
COMMON	fig|316407.3.peg.176	rxn05406	fig|316407.3.peg.176rxn05406	0.709716		COMMON	fig|316407.3.peg.176	rxn05406	fig|316407.3.peg.176rxn05406	0.709716
COMMON	fig|316407.3.peg.176	rxn05390	fig|316407.3.peg.176rxn05390	0.709716		COMMON	fig|316407.3.peg.176	rxn05390	fig|316407.3.peg.176rxn05390	0.709716
COMMON	fig|316407.3.peg.176	rxn05402	fig|316407.3.peg.176rxn05402	0.709716		COMMON	fig|316407.3.peg.176	rxn05402	fig|316407.3.peg.176rxn05402	0.709716
COMMON	fig|316407.3.peg.176	rxn05386	fig|316407.3.peg.176rxn05386	0.709716		COMMON	fig|316407.3.peg.176	rxn05386	fig|316407.3.peg.176rxn05386	0.709716
COMMON	fig|316407.3.peg.176	rxn05394	fig|316407.3.peg.176rxn05394	0.709716		COMMON	fig|316407.3.peg.176	rxn05394	fig|316407.3.peg.176rxn05394	0.709716
COMMON	fig|316407.3.peg.176	rxn05377	fig|316407.3.peg.176rxn05377	0.709716		COMMON	fig|316407.3.peg.176	rxn05377	fig|316407.3.peg.176rxn05377	0.709716
COMMON	fig|316407.3.peg.176	rxn05398	fig|316407.3.peg.176rxn05398	0.709716		COMMON	fig|316407.3.peg.176	rxn05398	fig|316407.3.peg.176rxn05398	0.709716
COMMON	fig|316407.3.peg.176	rxn05381	fig|316407.3.peg.176rxn05381	0.709716		COMMON	fig|316407.3.peg.176	rxn05381	fig|316407.3.peg.176rxn05381	0.709716
COMMON	fig|316407.3.peg.176	rxn05373	fig|316407.3.peg.176rxn05373	0.709716		COMMON	fig|316407.3.peg.176	rxn05373	fig|316407.3.peg.176rxn05373	0.709716
COMMON	fig|316407.3.peg.176	rxn05369	fig|316407.3.peg.176rxn05369	0.709716		COMMON	fig|316407.3.peg.176	rxn05369	fig|316407.3.peg.176rxn05369	0.709716
COMMON	fig|316407.3.peg.176	rxn05462	fig|316407.3.peg.176rxn05462	0.709716		COMMON	fig|316407.3.peg.176	rxn05462	fig|316407.3.peg.176rxn05462	0.709716
COMMON	fig|316407.3.peg.176	rxn05365	fig|316407.3.peg.176rxn05365	0.709716		COMMON	fig|316407.3.peg.176	rxn05365	fig|316407.3.peg.176rxn05365	0.709716
COMMON	fig|316407.3.peg.176	rxn05361	fig|316407.3.peg.176rxn05361	0.709716		COMMON	fig|316407.3.peg.176	rxn05361	fig|316407.3.peg.176rxn05361	0.709716
COMMON	fig|316407.3.peg.167	rxn00119	fig|316407.3.peg.167rxn00119	0.952098		COMMON	fig|316407.3.peg.167	rxn00119	fig|316407.3.peg.167rxn00119	0.952098
COMMON	fig|316407.3.peg.258	rxn01644	fig|316407.3.peg.258rxn01644	0.0198379		COMMON	fig|316407.3.peg.258	rxn01644	fig|316407.3.peg.258rxn01644	0.0198379
COMMON	fig|316407.3.peg.2197	rxn11703	fig|316407.3.peg.2197rxn11703	0.946513		COMMON	fig|316407.3.peg.2197	rxn11703	fig|316407.3.peg.2197rxn11703	0.946513
COMMON	fig|316407.3.peg.3303	rxn10094	fig|316407.3.peg.3303rxn10094	0.828192		COMMON	fig|316407.3.peg.3303	rxn10094	fig|316407.3.peg.3303rxn10094	0.828192
COMMON	fig|316407.3.peg.3303	rxn03397	fig|316407.3.peg.3303rxn03397	0.828192		COMMON	fig|316407.3.peg.3303	rxn03397	fig|316407.3.peg.3303rxn03397	0.828192
COMMON	fig|316407.3.peg.31	rxn02929	fig|316407.3.peg.31rxn02929	0.442602		COMMON	fig|316407.3.peg.31	rxn02929	fig|316407.3.peg.31rxn02929	0.442602
COMMON	fig|316407.3.peg.1929	rxn03538	fig|316407.3.peg.1929rxn03538	0.804497		COMMON	fig|316407.3.peg.1929	rxn03538	fig|316407.3.peg.1929rxn03538	0.804497
COMMON	fig|345073.6.peg.1600	rxn03538	fig|345073.6.peg.1600rxn03538	0.949239		COMMON	fig|345073.6.peg.1600	rxn03538	fig|345073.6.peg.1600rxn03538	0.949239
COMMON	fig|345073.6.peg.1615	rxn11946	fig|345073.6.peg.1615rxn11946	0.258487		COMMON	fig|345073.6.peg.1615	rxn11946	fig|345073.6.peg.1615rxn11946	0.258487
COMMON	fig|345073.6.peg.1615	rxn03395	fig|345073.6.peg.1615rxn03395	0.258487		COMMON	fig|345073.6.peg.1615	rxn03395	fig|345073.6.peg.1615rxn03395	0.258487
COMMON	fig|345073.6.peg.1927	rxn03167	fig|345073.6.peg.1927rxn03167	0.7593		COMMON	fig|345073.6.peg.1927	rxn03167	fig|345073.6.peg.1927rxn03167	0.7593
COMMON	fig|345073.6.peg.3115	rxn01675	fig|345073.6.peg.3115rxn01675	0.0148376		COMMON	fig|345073.6.peg.3115	rxn01675	fig|345073.6.peg.3115rxn01675	0.0148376
COMMON	fig|345073.6.peg.1241	rxn08618	fig|345073.6.peg.1241rxn08618	0.00130535		COMMON	fig|345073.6.peg.1241	rxn08618	fig|345073.6.peg.1241rxn08618	0.00130535
COMMON	fig|345073.6.peg.2032	rxn00979	fig|345073.6.peg.2032rxn00979	0.0558206		COMMON	fig|345073.6.peg.2032	rxn00979	fig|345073.6.peg.2032rxn00979	0.0558206
COMMON	fig|345073.6.peg.2824	rxn08333	fig|345073.6.peg.2824rxn08333	0.555692		COMMON	fig|345073.6.peg.2824	rxn08333	fig|345073.6.peg.2824rxn08333	0.555692
COMMON	fig|345073.6.peg.1354	rxn05407	fig|345073.6.peg.1354rxn05407	0.0661665		COMMON	fig|345073.6.peg.1354	rxn05407	fig|345073.6.peg.1354rxn05407	0.0661665
COMMON	fig|345073.6.peg.1354	rxn05382	fig|345073.6.peg.1354rxn05382	0.0661665		COMMON	fig|345073.6.peg.1354	rxn05382	fig|345073.6.peg.1354rxn05382	0.0661665
COMMON	fig|345073.6.peg.1354	rxn05403	fig|345073.6.peg.1354rxn05403	0.0661665		COMMON	fig|345073.6.peg.1354	rxn05403	fig|345073.6.peg.1354rxn05403	0.0661665
COMMON	fig|345073.6.peg.1354	rxn05387	fig|345073.6.peg.1354rxn05387	0.0661665		COMMON	fig|345073.6.peg.1354	rxn05387	fig|345073.6.peg.1354rxn05387	0.0661665
COMMON	fig|345073.6.peg.1354	rxn05374	fig|345073.6.peg.1354rxn05374	0.0661665		COMMON	fig|345073.6.peg.1354	rxn05374	fig|345073.6.peg.1354rxn05374	0.0661665
COMMON	fig|345073.6.peg.1354	rxn05399	fig|345073.6.peg.1354rxn05399	0.0661665		COMMON	fig|345073.6.peg.1354	rxn05399	fig|345073.6.peg.1354rxn05399	0.0661665
COMMON	fig|345073.6.peg.1354	rxn05366	fig|345073.6.peg.1354rxn05366	0.0661665		COMMON	fig|345073.6.peg.1354	rxn05366	fig|345073.6.peg.1354rxn05366	0.0661665
COMMON	fig|345073.6.peg.1354	rxn05391	fig|345073.6.peg.1354rxn05391	0.0661665		COMMON	fig|345073.6.peg.1354	rxn05391	fig|345073.6.peg.1354rxn05391	0.0661665
COMMON	fig|345073.6.peg.1354	rxn05370	fig|345073.6.peg.1354rxn05370	0.0661665		COMMON	fig|345073.6.peg.1354	rxn05370	fig|345073.6.peg.1354rxn05370	0.0661665
COMMON	fig|345073.6.peg.2974	rxn10094	fig|345073.6.peg.2974rxn10094	0.822053		COMMON	fig|345073.6.peg.2974	rxn10094	fig|345073.6.peg.2974rxn10094	0.822053
COMMON	fig|345073.6.peg.2974	rxn03397	fig|345073.6.peg.2974rxn03397	0.822053		COMMON	fig|345073.6.peg.2974	rxn03397	fig|345073.6.peg.2974rxn03397	0.822053
COMMON	fig|345073.6.peg.2994	rxn09997	fig|345073.6.peg.2994rxn09997	0.743405		COMMON	fig|345073.6.peg.2994	rxn09997	fig|345073.6.peg.2994rxn09997	0.743405
COMMON	fig|345073.6.peg.2463	rxn00119	fig|345073.6.peg.2463rxn00119	0.959171		COMMON	fig|345073.6.peg.2463	rxn00119	fig|345073.6.peg.2463rxn00119	0.959171
COMMON	fig|345073.6.peg.2574	rxn02929	fig|345073.6.peg.2574rxn02929	0.410154		COMMON	fig|345073.6.peg.2574	rxn02929	fig|345073.6.peg.2574rxn02929	0.410154
COMMON	fig|345073.6.peg.2454	rxn05406	fig|345073.6.peg.2454rxn05406	0.722511		COMMON	fig|345073.6.peg.2454	rxn05406	fig|345073.6.peg.2454rxn05406	0.722511
COMMON	fig|345073.6.peg.2454	rxn05390	fig|345073.6.peg.2454rxn05390	0.722511		COMMON	fig|345073.6.peg.2454	rxn05390	fig|345073.6.peg.2454rxn05390	0.722511
COMMON	fig|345073.6.peg.2454	rxn05402	fig|345073.6.peg.2454rxn05402	0.722511		COMMON	fig|345073.6.peg.2454	rxn05402	fig|345073.6.peg.2454rxn05402	0.722511
COMMON	fig|345073.6.peg.2454	rxn05386	fig|345073.6.peg.2454rxn05386	0.722511		COMMON	fig|345073.6.peg.2454	rxn05386	fig|345073.6.peg.2454rxn05386	0.722511
COMMON	fig|345073.6.peg.2454	rxn05394	fig|345073.6.peg.2454rxn05394	0.722511		COMMON	fig|345073.6.peg.2454	rxn05394	fig|345073.6.peg.2454rxn05394	0.722511
COMMON	fig|345073.6.peg.2454	rxn05377	fig|345073.6.peg.2454rxn05377	0.722511		COMMON	fig|345073.6.peg.2454	rxn05377	fig|345073.6.peg.2454rxn05377	0.722511
COMMON	fig|345073.6.peg.2454	rxn05398	fig|345073.6.peg.2454rxn05398	0.722511		COMMON	fig|345073.6.peg.2454	rxn05398	fig|345073.6.peg.2454rxn05398	0.722511
COMMON	fig|345073.6.peg.2454	rxn05381	fig|345073.6.peg.2454rxn05381	0.722511		COMMON	fig|345073.6.peg.2454	rxn05381	fig|345073.6.peg.2454rxn05381	0.722511
COMMON	fig|345073.6.peg.2454	rxn05373	fig|345073.6.peg.2454rxn05373	0.722511		COMMON	fig|345073.6.peg.2454	rxn05373	fig|345073.6.peg.2454rxn05373	0.722511
COMMON	fig|345073.6.peg.2454	rxn05365	fig|345073.6.peg.2454rxn05365	0.722511		COMMON	fig|345073.6.peg.2454	rxn05365	fig|345073.6.peg.2454rxn05365	0.722511
COMMON	fig|345073.6.peg.2454	rxn05369	fig|345073.6.peg.2454rxn05369	0.722511		COMMON	fig|345073.6.peg.2454	rxn05369	fig|345073.6.peg.2454rxn05369	0.722511
COMMON	fig|345073.6.peg.2454	rxn05361	fig|345073.6.peg.2454rxn05361	0.722511		COMMON	fig|345073.6.peg.2454	rxn05361	fig|345073.6.peg.2454rxn05361	0.722511
COMMON	fig|345073.6.peg.1894	rxn02270	fig|345073.6.peg.1894rxn02270	0.0727562		COMMON	fig|345073.6.peg.1894	rxn02270	fig|345073.6.peg.1894rxn02270	0.0727562
COMMON	fig|345073.6.peg.2215	rxn11703	fig|345073.6.peg.2215rxn11703	0.864282		COMMON	fig|345073.6.peg.2215	rxn11703	fig|345073.6.peg.2215rxn11703	0.864282
COMMON	fig|401614.5.peg.1480	rxn00802	fig|401614.5.peg.1480rxn00802	0.829523		COMMON	fig|401614.5.peg.1480	rxn00802	fig|401614.5.peg.1480rxn00802	0.829523
COMMON	fig|401614.5.peg.694	rxn05029	fig|401614.5.peg.694rxn05029	0.183673		COMMON	fig|401614.5.peg.694	rxn05029	fig|401614.5.peg.694rxn05029	0.183673
COMMON	fig|401614.5.peg.451	rxn05466	fig|401614.5.peg.451rxn05466	0.0143007		COMMON	fig|401614.5.peg.451	rxn05466	fig|401614.5.peg.451rxn05466	0.0143007
COMMON	fig|401614.5.peg.1376	rxn03919	fig|401614.5.peg.1376rxn03919	0.000942098		COMMON	fig|401614.5.peg.1376	rxn03919	fig|401614.5.peg.1376rxn03919	0.000942098
COMMON	fig|401614.5.peg.1237	rxn08619	fig|401614.5.peg.1237rxn08619	0.17675		COMMON	fig|401614.5.peg.1237	rxn08619	fig|401614.5.peg.1237rxn08619	0.17675
COMMON	fig|401614.5.peg.1237	rxn08620	fig|401614.5.peg.1237rxn08620	0.29181		COMMON	fig|401614.5.peg.1237	rxn08620	fig|401614.5.peg.1237rxn08620	0.29181
COMMON	fig|401614.5.peg.343	rxn00493	fig|401614.5.peg.343rxn00493	0.044221		COMMON	fig|401614.5.peg.343	rxn00493	fig|401614.5.peg.343rxn00493	0.044221
COMMON	fig|401614.5.peg.1350	rxn00693	fig|401614.5.peg.1350rxn00693	0.0796133		COMMON	fig|401614.5.peg.1350	rxn00693	fig|401614.5.peg.1350rxn00693	0.0796133
COMMON	fig|401614.5.peg.768	rxn02155	fig|401614.5.peg.768rxn02155	0.0941013		COMMON	fig|401614.5.peg.768	rxn02155	fig|401614.5.peg.768rxn02155	0.0941013
COMMON	fig|401614.5.peg.1450	rxn05406	fig|401614.5.peg.1450rxn05406	0.652468		COMMON	fig|401614.5.peg.1450	rxn05406	fig|401614.5.peg.1450rxn05406	0.652468
COMMON	fig|401614.5.peg.1450	rxn05462	fig|401614.5.peg.1450rxn05462	0.652468		COMMON	fig|401614.5.peg.1450	rxn05462	fig|401614.5.peg.1450rxn05462	0.652468
COMMON	fig|401614.5.peg.1450	rxn05402	fig|401614.5.peg.1450rxn05402	0.652468		COMMON	fig|401614.5.peg.1450	rxn05402	fig|401614.5.peg.1450rxn05402	0.652468
COMMON	fig|401614.5.peg.1450	rxn05386	fig|401614.5.peg.1450rxn05386	0.652468		COMMON	fig|401614.5.peg.1450	rxn05386	fig|401614.5.peg.1450rxn05386	0.652468
COMMON	fig|401614.5.peg.1450	rxn05381	fig|401614.5.peg.1450rxn05381	0.652468		COMMON	fig|401614.5.peg.1450	rxn05381	fig|401614.5.peg.1450rxn05381	0.652468
COMMON	fig|401614.5.peg.1450	rxn05398	fig|401614.5.peg.1450rxn05398	0.652468		COMMON	fig|401614.5.peg.1450	rxn05398	fig|401614.5.peg.1450rxn05398	0.652468
COMMON	fig|401614.5.peg.1450	rxn05377	fig|401614.5.peg.1450rxn05377	0.652468		COMMON	fig|401614.5.peg.1450	rxn05377	fig|401614.5.peg.1450rxn05377	0.652468
COMMON	fig|401614.5.peg.1450	rxn05361	fig|401614.5.peg.1450rxn05361	0.652468		COMMON	fig|401614.5.peg.1450	rxn05361	fig|401614.5.peg.1450rxn05361	0.652468
COMMON	fig|401614.5.peg.1450	rxn05373	fig|401614.5.peg.1450rxn05373	0.652468		COMMON	fig|401614.5.peg.1450	rxn05373	fig|401614.5.peg.1450rxn05373	0.652468
COMMON	fig|401614.5.peg.1450	rxn05365	fig|401614.5.peg.1450rxn05365	0.652468		COMMON	fig|401614.5.peg.1450	rxn05365	fig|401614.5.peg.1450rxn05365	0.652468
COMMON	fig|401614.5.peg.1450	rxn05394	fig|401614.5.peg.1450rxn05394	0.652468		COMMON	fig|401614.5.peg.1450	rxn05394	fig|401614.5.peg.1450rxn05394	0.652468
COMMON	fig|401614.5.peg.1450	rxn05369	fig|401614.5.peg.1450rxn05369	0.652468		COMMON	fig|401614.5.peg.1450	rxn05369	fig|401614.5.peg.1450rxn05369	0.652468
COMMON	fig|401614.5.peg.1450	rxn05390	fig|401614.5.peg.1450rxn05390	0.652468		COMMON	fig|401614.5.peg.1450	rxn05390	fig|401614.5.peg.1450rxn05390	0.652468
COMMON	fig|401614.5.peg.456	rxn05466	fig|401614.5.peg.456rxn05466	0.0164926		COMMON	fig|401614.5.peg.456	rxn05466	fig|401614.5.peg.456rxn05466	0.0164926
COMMON	fig|401614.5.peg.1395	rxn08618	fig|401614.5.peg.1395rxn08618	0.0224867		COMMON	fig|401614.5.peg.1395	rxn08618	fig|401614.5.peg.1395rxn08618	0.0224867
COMMON	fig|401614.5.peg.1715	rxn10214	fig|401614.5.peg.1715rxn10214	0.835515		COMMON	fig|401614.5.peg.1715	rxn10214	fig|401614.5.peg.1715rxn10214	0.835515
COMMON	fig|401614.5.peg.1715	rxn10215	fig|401614.5.peg.1715rxn10215	0.835515		COMMON	fig|401614.5.peg.1715	rxn10215	fig|401614.5.peg.1715rxn10215	0.835515
COMMON	fig|401614.5.peg.1715	rxn10213	fig|401614.5.peg.1715rxn10213	0.835515		COMMON	fig|401614.5.peg.1715	rxn10213	fig|401614.5.peg.1715rxn10213	0.835515
COMMON	fig|401614.5.peg.1714	rxn10214	fig|401614.5.peg.1714rxn10214	0.857822		COMMON	fig|401614.5.peg.1714	rxn10214	fig|401614.5.peg.1714rxn10214	0.857822
COMMON	fig|401614.5.peg.1714	rxn10215	fig|401614.5.peg.1714rxn10215	0.857822		COMMON	fig|401614.5.peg.1714	rxn10215	fig|401614.5.peg.1714rxn10215	0.857822
COMMON	fig|401614.5.peg.1714	rxn10213	fig|401614.5.peg.1714rxn10213	0.857822		COMMON	fig|401614.5.peg.1714	rxn10213	fig|401614.5.peg.1714rxn10213	0.857822
COMMON	fig|401614.5.peg.583	rxn00802	fig|401614.5.peg.583rxn00802	0.664527		COMMON	fig|401614.5.peg.583	rxn00802	fig|401614.5.peg.583rxn00802	0.664527
COMMON	fig|401614.5.peg.1009	rxn05104	fig|401614.5.peg.1009rxn05104	0.0203736		COMMON	fig|401614.5.peg.1009	rxn05104	fig|401614.5.peg.1009rxn05104	0.0203736
COMMON	fig|401614.5.peg.1194	rxn08713	fig|401614.5.peg.1194rxn08713	0.0689613		COMMON	fig|401614.5.peg.1194	rxn08713	fig|401614.5.peg.1194rxn08713	0.0689613
COMMON	fig|401614.5.peg.232	rxn00119	fig|401614.5.peg.232rxn00119	0.945185		COMMON	fig|401614.5.peg.232	rxn00119	fig|401614.5.peg.232rxn00119	0.945185
COMMON	fig|401614.5.peg.418	rxn03175	fig|401614.5.peg.418rxn03175	0.221759		COMMON	fig|401614.5.peg.418	rxn03175	fig|401614.5.peg.418rxn03175	0.221759
COMMON	fig|401614.5.peg.1346	rxn02264	fig|401614.5.peg.1346rxn02264	0.00996157		COMMON	fig|401614.5.peg.1346	rxn02264	fig|401614.5.peg.1346rxn02264	0.00996157
COMMON	fig|401614.5.peg.1260	rxn00138	fig|401614.5.peg.1260rxn00138	0.74713		COMMON	fig|401614.5.peg.1260	rxn00138	fig|401614.5.peg.1260rxn00138	0.74713
COMMON	fig|401614.5.peg.322	rxn11946	fig|401614.5.peg.322rxn11946	0.254525		COMMON	fig|401614.5.peg.322	rxn11946	fig|401614.5.peg.322rxn11946	0.254525
COMMON	fig|401614.5.peg.322	rxn03395	fig|401614.5.peg.322rxn03395	0.254525		COMMON	fig|401614.5.peg.322	rxn03395	fig|401614.5.peg.322rxn03395	0.254525
COMMON	fig|401614.5.peg.126	rxn00979	fig|401614.5.peg.126rxn00979	0.0494529		COMMON	fig|401614.5.peg.126	rxn00979	fig|401614.5.peg.126rxn00979	0.0494529
COMMON	fig|62977.3.peg.3112	rxn00979	fig|62977.3.peg.3112rxn00979	0.0970426		COMMON	fig|62977.3.peg.3112	rxn00979	fig|62977.3.peg.3112rxn00979	0.0970426
COMMON	fig|62977.3.peg.6	rxn08583	fig|62977.3.peg.6rxn08583	0.00389991		COMMON	fig|62977.3.peg.6	rxn08583	fig|62977.3.peg.6rxn08583	0.00389991
COMMON	fig|62977.3.peg.683	rxn05406	fig|62977.3.peg.683rxn05406	0.718332		COMMON	fig|62977.3.peg.683	rxn05406	fig|62977.3.peg.683rxn05406	0.718332
COMMON	fig|62977.3.peg.683	rxn05390	fig|62977.3.peg.683rxn05390	0.718332		COMMON	fig|62977.3.peg.683	rxn05390	fig|62977.3.peg.683rxn05390	0.718332
COMMON	fig|62977.3.peg.683	rxn05402	fig|62977.3.peg.683rxn05402	0.718332		COMMON	fig|62977.3.peg.683	rxn05402	fig|62977.3.peg.683rxn05402	0.718332
COMMON	fig|62977.3.peg.683	rxn05386	fig|62977.3.peg.683rxn05386	0.718332		COMMON	fig|62977.3.peg.683	rxn05386	fig|62977.3.peg.683rxn05386	0.718332
COMMON	fig|62977.3.peg.683	rxn05394	fig|62977.3.peg.683rxn05394	0.718332		COMMON	fig|62977.3.peg.683	rxn05394	fig|62977.3.peg.683rxn05394	0.718332
COMMON	fig|62977.3.peg.683	rxn05377	fig|62977.3.peg.683rxn05377	0.718332		COMMON	fig|62977.3.peg.683	rxn05377	fig|62977.3.peg.683rxn05377	0.718332
COMMON	fig|62977.3.peg.683	rxn05398	fig|62977.3.peg.683rxn05398	0.718332		COMMON	fig|62977.3.peg.683	rxn05398	fig|62977.3.peg.683rxn05398	0.718332
COMMON	fig|62977.3.peg.683	rxn05381	fig|62977.3.peg.683rxn05381	0.718332		COMMON	fig|62977.3.peg.683	rxn05381	fig|62977.3.peg.683rxn05381	0.718332
COMMON	fig|62977.3.peg.683	rxn05373	fig|62977.3.peg.683rxn05373	0.718332		COMMON	fig|62977.3.peg.683	rxn05373	fig|62977.3.peg.683rxn05373	0.718332
COMMON	fig|62977.3.peg.683	rxn05369	fig|62977.3.peg.683rxn05369	0.718332		COMMON	fig|62977.3.peg.683	rxn05369	fig|62977.3.peg.683rxn05369	0.718332
COMMON	fig|62977.3.peg.683	rxn05462	fig|62977.3.peg.683rxn05462	0.718332		COMMON	fig|62977.3.peg.683	rxn05462	fig|62977.3.peg.683rxn05462	0.718332
COMMON	fig|62977.3.peg.683	rxn05365	fig|62977.3.peg.683rxn05365	0.718332		COMMON	fig|62977.3.peg.683	rxn05365	fig|62977.3.peg.683rxn05365	0.718332
COMMON	fig|62977.3.peg.683	rxn05361	fig|62977.3.peg.683rxn05361	0.718332		COMMON	fig|62977.3.peg.683	rxn05361	fig|62977.3.peg.683rxn05361	0.718332
COMMON	fig|62977.3.peg.181	rxn00917	fig|62977.3.peg.181rxn00917	0.889848		COMMON	fig|62977.3.peg.181	rxn00917	fig|62977.3.peg.181rxn00917	0.889848
COMMON	fig|62977.3.peg.1652	rxn02898	fig|62977.3.peg.1652rxn02898	0.189908		COMMON	fig|62977.3.peg.1652	rxn02898	fig|62977.3.peg.1652rxn02898	0.189908
COMMON	fig|62977.3.peg.2256	rxn03919	fig|62977.3.peg.2256rxn03919	0.010324		COMMON	fig|62977.3.peg.2256	rxn03919	fig|62977.3.peg.2256rxn03919	0.010324
COMMON	fig|62977.3.peg.279	rxn05029	fig|62977.3.peg.279rxn05029	0.977519		COMMON	fig|62977.3.peg.279	rxn05029	fig|62977.3.peg.279rxn05029	0.977519
COMMON	fig|62977.3.peg.617	rxn09997	fig|62977.3.peg.617rxn09997	0.727418		COMMON	fig|62977.3.peg.617	rxn09997	fig|62977.3.peg.617rxn09997	0.727418
COMMON	fig|62977.3.peg.3270	rxn02929	fig|62977.3.peg.3270rxn02929	0.403936		COMMON	fig|62977.3.peg.3270	rxn02929	fig|62977.3.peg.3270rxn02929	0.403936
COMMON	fig|62977.3.peg.2543	rxn06023	fig|62977.3.peg.2543rxn06023	0.197527		COMMON	fig|62977.3.peg.2543	rxn06023	fig|62977.3.peg.2543rxn06023	0.197527
COMMON	fig|62977.3.peg.604	rxn00119	fig|62977.3.peg.604rxn00119	0.967503		COMMON	fig|62977.3.peg.604	rxn00119	fig|62977.3.peg.604rxn00119	0.967503
COMMON	fig|62977.3.peg.2790	rxn02155	fig|62977.3.peg.2790rxn02155	0.0321424		COMMON	fig|62977.3.peg.2790	rxn02155	fig|62977.3.peg.2790rxn02155	0.0321424
COMMON	fig|62977.3.peg.3240	rxn01644	fig|62977.3.peg.3240rxn01644	0.026833		COMMON	fig|62977.3.peg.3240	rxn01644	fig|62977.3.peg.3240rxn01644	0.026833
COMMON	fig|62977.3.peg.1265	rxn08618	fig|62977.3.peg.1265rxn08618	0.0996862		COMMON	fig|62977.3.peg.1265	rxn08618	fig|62977.3.peg.1265rxn08618	0.0996862
COMMON	fig|62977.3.peg.1237	rxn03150	fig|62977.3.peg.1237rxn03150	0.239189		COMMON	fig|62977.3.peg.1237	rxn03150	fig|62977.3.peg.1237rxn03150	0.239189
COMMON	fig|62977.3.peg.2920	rxn00917	fig|62977.3.peg.2920rxn00917	0.840216		COMMON	fig|62977.3.peg.2920	rxn00917	fig|62977.3.peg.2920rxn00917	0.840216
COMMON	fig|62977.3.peg.1268	rxn08713	fig|62977.3.peg.1268rxn08713	0.106503		COMMON	fig|62977.3.peg.1268	rxn08713	fig|62977.3.peg.1268rxn08713	0.106503
COMMON	fig|71421.1.peg.891	rxn00693	fig|71421.1.peg.891rxn00693	0.0834904		COMMON	fig|71421.1.peg.891	rxn00693	fig|71421.1.peg.891rxn00693	0.0834904
COMMON	fig|71421.1.peg.300	rxn09310	fig|71421.1.peg.300rxn09310	0.00568729		COMMON	fig|71421.1.peg.300	rxn09310	fig|71421.1.peg.300rxn09310	0.00568729
COMMON	fig|71421.1.peg.639	rxn00623	fig|71421.1.peg.639rxn00623	0.0596717		COMMON	fig|71421.1.peg.639	rxn00623	fig|71421.1.peg.639rxn00623	0.0596717
COMMON	fig|71421.1.peg.916	rxn00467	fig|71421.1.peg.916rxn00467	0.00545155		COMMON	fig|71421.1.peg.916	rxn00467	fig|71421.1.peg.916rxn00467	0.00545155
COMMON	fig|71421.1.peg.1115	rxn00693	fig|71421.1.peg.1115rxn00693	0.0979086		COMMON	fig|71421.1.peg.1115	rxn00693	fig|71421.1.peg.1115rxn00693	0.0979086
COMMON	fig|71421.1.peg.265	rxn11703	fig|71421.1.peg.265rxn11703	0.952005		COMMON	fig|71421.1.peg.265	rxn11703	fig|71421.1.peg.265rxn11703	0.952005
COMMON	fig|71421.1.peg.1404	rxn05117	fig|71421.1.peg.1404rxn05117	0.00110339		COMMON	fig|71421.1.peg.1404	rxn05117	fig|71421.1.peg.1404rxn05117	0.00110339
COMMON	fig|71421.1.peg.1404	rxn02402	fig|71421.1.peg.1404rxn02402	0.180375		COMMON	fig|71421.1.peg.1404	rxn02402	fig|71421.1.peg.1404rxn02402	0.180375
COMMON	fig|71421.1.peg.240	rxn01644	fig|71421.1.peg.240rxn01644	0.00821971		COMMON	fig|71421.1.peg.240	rxn01644	fig|71421.1.peg.240rxn01644	0.00821971
COMMON	fig|71421.1.peg.240	rxn02988	fig|71421.1.peg.240rxn02988	0.0655803		COMMON	fig|71421.1.peg.240	rxn02988	fig|71421.1.peg.240rxn02988	0.0655803
COMMON	fig|71421.1.peg.1466	rxn01675	fig|71421.1.peg.1466rxn01675	0.00217475		COMMON	fig|71421.1.peg.1466	rxn01675	fig|71421.1.peg.1466rxn01675	0.00217475
COMMON	fig|71421.1.peg.207	rxn05466	fig|71421.1.peg.207rxn05466	0.0372765		COMMON	fig|71421.1.peg.207	rxn05466	fig|71421.1.peg.207rxn05466	0.0372765
COMMON	fig|71421.1.peg.268	rxn03086	fig|71421.1.peg.268rxn03086	0.000271051		COMMON	fig|71421.1.peg.268	rxn03086	fig|71421.1.peg.268rxn03086	0.000271051
COMMON	fig|71421.1.peg.572	rxn02264	fig|71421.1.peg.572rxn02264	0.00691191		COMMON	fig|71421.1.peg.572	rxn02264	fig|71421.1.peg.572rxn02264	0.00691191
COMMON	fig|71421.1.peg.1263	rxn05331	fig|71421.1.peg.1263rxn05331	0.698304		COMMON	fig|71421.1.peg.1263	rxn05331	fig|71421.1.peg.1263rxn05331	0.698304
COMMON	fig|71421.1.peg.1263	rxn05333	fig|71421.1.peg.1263rxn05333	0.698304		COMMON	fig|71421.1.peg.1263	rxn05333	fig|71421.1.peg.1263rxn05333	0.698304
COMMON	fig|71421.1.peg.1263	rxn05335	fig|71421.1.peg.1263rxn05335	0.698304		COMMON	fig|71421.1.peg.1263	rxn05335	fig|71421.1.peg.1263rxn05335	0.698304
COMMON	fig|71421.1.peg.1383	rxn09310	fig|71421.1.peg.1383rxn09310	0.374875		COMMON	fig|71421.1.peg.1383	rxn09310	fig|71421.1.peg.1383rxn09310	0.374875
COMMON	fig|71421.1.peg.33	rxn02155	fig|71421.1.peg.33rxn02155	0.0265933		COMMON	fig|71421.1.peg.33	rxn02155	fig|71421.1.peg.33rxn02155	0.0265933
COMMON	fig|71421.1.peg.869	rxn02056	fig|71421.1.peg.869rxn02056	0.262065		COMMON	fig|71421.1.peg.869	rxn02056	fig|71421.1.peg.869rxn02056	0.262065
COMMON	fig|71421.1.peg.1021	rxn05406	fig|71421.1.peg.1021rxn05406	0.753499		COMMON	fig|71421.1.peg.1021	rxn05406	fig|71421.1.peg.1021rxn05406	0.753499
COMMON	fig|71421.1.peg.1021	rxn05369	fig|71421.1.peg.1021rxn05369	0.753499		COMMON	fig|71421.1.peg.1021	rxn05369	fig|71421.1.peg.1021rxn05369	0.753499
COMMON	fig|71421.1.peg.1021	rxn05402	fig|71421.1.peg.1021rxn05402	0.753499		COMMON	fig|71421.1.peg.1021	rxn05402	fig|71421.1.peg.1021rxn05402	0.753499
COMMON	fig|71421.1.peg.1021	rxn05386	fig|71421.1.peg.1021rxn05386	0.753499		COMMON	fig|71421.1.peg.1021	rxn05386	fig|71421.1.peg.1021rxn05386	0.753499
COMMON	fig|71421.1.peg.1021	rxn05381	fig|71421.1.peg.1021rxn05381	0.753499		COMMON	fig|71421.1.peg.1021	rxn05381	fig|71421.1.peg.1021rxn05381	0.753499
COMMON	fig|71421.1.peg.1021	rxn05398	fig|71421.1.peg.1021rxn05398	0.753499		COMMON	fig|71421.1.peg.1021	rxn05398	fig|71421.1.peg.1021rxn05398	0.753499
COMMON	fig|71421.1.peg.1021	rxn05377	fig|71421.1.peg.1021rxn05377	0.753499		COMMON	fig|71421.1.peg.1021	rxn05377	fig|71421.1.peg.1021rxn05377	0.753499
COMMON	fig|71421.1.peg.1021	rxn05361	fig|71421.1.peg.1021rxn05361	0.753499		COMMON	fig|71421.1.peg.1021	rxn05361	fig|71421.1.peg.1021rxn05361	0.753499
COMMON	fig|71421.1.peg.1021	rxn05373	fig|71421.1.peg.1021rxn05373	0.753499		COMMON	fig|71421.1.peg.1021	rxn05373	fig|71421.1.peg.1021rxn05373	0.753499
COMMON	fig|71421.1.peg.1021	rxn05365	fig|71421.1.peg.1021rxn05365	0.753499		COMMON	fig|71421.1.peg.1021	rxn05365	fig|71421.1.peg.1021rxn05365	0.753499
COMMON	fig|71421.1.peg.1021	rxn05331	fig|71421.1.peg.1021rxn05331	0.753499		COMMON	fig|71421.1.peg.1021	rxn05331	fig|71421.1.peg.1021rxn05331	0.753499
COMMON	fig|71421.1.peg.1021	rxn05394	fig|71421.1.peg.1021rxn05394	0.753499		COMMON	fig|71421.1.peg.1021	rxn05394	fig|71421.1.peg.1021rxn05394	0.753499
COMMON	fig|71421.1.peg.1021	rxn05333	fig|71421.1.peg.1021rxn05333	0.753499		COMMON	fig|71421.1.peg.1021	rxn05333	fig|71421.1.peg.1021rxn05333	0.753499
COMMON	fig|71421.1.peg.1021	rxn05390	fig|71421.1.peg.1021rxn05390	0.753499		COMMON	fig|71421.1.peg.1021	rxn05390	fig|71421.1.peg.1021rxn05390	0.753499
COMMON	fig|71421.1.peg.1021	rxn05335	fig|71421.1.peg.1021rxn05335	0.753499		COMMON	fig|71421.1.peg.1021	rxn05335	fig|71421.1.peg.1021rxn05335	0.753499
COMMON	fig|71421.1.peg.1024	rxn00119	fig|71421.1.peg.1024rxn00119	0.959115		COMMON	fig|71421.1.peg.1024	rxn00119	fig|71421.1.peg.1024rxn00119	0.959115
COMMON	fig|71421.1.peg.480	rxn08333	fig|71421.1.peg.480rxn08333	0.627253		COMMON	fig|71421.1.peg.480	rxn08333	fig|71421.1.peg.480rxn08333	0.627253
COMMON	fig|71421.1.peg.352	rxn09310	fig|71421.1.peg.352rxn09310	0.0922044		COMMON	fig|71421.1.peg.352	rxn09310	fig|71421.1.peg.352rxn09310	0.0922044
COMMON	fig|71421.1.peg.1246	rxn02929	fig|71421.1.peg.1246rxn02929	0.416667		COMMON	fig|71421.1.peg.1246	rxn02929	fig|71421.1.peg.1246rxn02929	0.416667
COMMON	fig|71421.1.peg.555	rxn01972	fig|71421.1.peg.555rxn01972	0.646986		COMMON	fig|71421.1.peg.555	rxn01972	fig|71421.1.peg.555rxn01972	0.646986
COMMON	fig|71421.1.peg.333	rxn01537	fig|71421.1.peg.333rxn01537	0.275551		COMMON	fig|71421.1.peg.333	rxn01537	fig|71421.1.peg.333rxn01537	0.275551
COMMON	fig|83332.1.peg.2210	rxn03538	fig|83332.1.peg.2210rxn03538	0.898781		COMMON	fig|83332.1.peg.2210	rxn03538	fig|83332.1.peg.2210rxn03538	0.898781
COMMON	fig|83332.1.peg.859	rxn00260	fig|83332.1.peg.859rxn00260	0.610897		COMMON	fig|83332.1.peg.859	rxn00260	fig|83332.1.peg.859rxn00260	0.610897
COMMON	fig|83332.1.peg.1407	rxn10094	fig|83332.1.peg.1407rxn10094	0.724945		COMMON	fig|83332.1.peg.1407	rxn10094	fig|83332.1.peg.1407rxn10094	0.724945
COMMON	fig|83332.1.peg.1407	rxn03397	fig|83332.1.peg.1407rxn03397	0.724945		COMMON	fig|83332.1.peg.1407	rxn03397	fig|83332.1.peg.1407rxn03397	0.724945
COMMON	fig|83332.1.peg.1405	rxn10094	fig|83332.1.peg.1405rxn10094	0.650746		COMMON	fig|83332.1.peg.1405	rxn10094	fig|83332.1.peg.1405rxn10094	0.650746
COMMON	fig|83332.1.peg.1405	rxn03397	fig|83332.1.peg.1405rxn03397	0.650746		COMMON	fig|83332.1.peg.1405	rxn03397	fig|83332.1.peg.1405rxn03397	0.650746
COMMON	fig|83332.1.peg.2133	rxn00137	fig|83332.1.peg.2133rxn00137	0.541799		COMMON	fig|83332.1.peg.2133	rxn00137	fig|83332.1.peg.2133rxn00137	0.541799
COMMON	fig|83332.1.peg.2775	rxn02929	fig|83332.1.peg.2775rxn02929	0.218491		COMMON	fig|83332.1.peg.2775	rxn02929	fig|83332.1.peg.2775rxn02929	0.218491
COMMON	fig|83332.1.peg.2755	rxn01644	fig|83332.1.peg.2755rxn01644	0.0152404		COMMON	fig|83332.1.peg.2755	rxn01644	fig|83332.1.peg.2755rxn01644	0.0152404
COMMON	fig|83332.1.peg.534	rxn08333	fig|83332.1.peg.534rxn08333	0.658053		COMMON	fig|83332.1.peg.534	rxn08333	fig|83332.1.peg.534rxn08333	0.658053
COMMON	fig|83332.1.peg.2943	rxn10191	fig|83332.1.peg.2943rxn10191	0.00131303		COMMON	fig|83332.1.peg.2943	rxn10191	fig|83332.1.peg.2943rxn10191	0.00131303
COMMON	fig|83332.1.peg.650	rxn00216	fig|83332.1.peg.650rxn00216	0.682693		COMMON	fig|83332.1.peg.650	rxn00216	fig|83332.1.peg.650rxn00216	0.682693
COMMON	fig|83332.1.peg.554	rxn11703	fig|83332.1.peg.554rxn11703	0.69022		COMMON	fig|83332.1.peg.554	rxn11703	fig|83332.1.peg.554rxn11703	0.69022
COMMON	fig|83332.1.peg.557	rxn08299	fig|83332.1.peg.557rxn08299	0.00422631		COMMON	fig|83332.1.peg.557	rxn08299	fig|83332.1.peg.557rxn08299	0.00422631
COMMON	fig|83332.1.peg.557	rxn10253	fig|83332.1.peg.557rxn10253	0.00422631		COMMON	fig|83332.1.peg.557	rxn10253	fig|83332.1.peg.557rxn10253	0.00422631
COMMON	fig|83332.1.peg.557	rxn10254	fig|83332.1.peg.557rxn10254	0.00422631		COMMON	fig|83332.1.peg.557	rxn10254	fig|83332.1.peg.557rxn10254	0.00422631
COMMON	fig|83332.1.peg.558	rxn10094	fig|83332.1.peg.558rxn10094	0.69777		COMMON	fig|83332.1.peg.558	rxn10094	fig|83332.1.peg.558rxn10094	0.69777
COMMON	fig|83332.1.peg.558	rxn03397	fig|83332.1.peg.558rxn03397	0.69777		COMMON	fig|83332.1.peg.558	rxn03397	fig|83332.1.peg.558rxn03397	0.69777
COMMON	fig|83332.1.peg.89	rxn11946	fig|83332.1.peg.89rxn11946	0.098018		COMMON	fig|83332.1.peg.89	rxn11946	fig|83332.1.peg.89rxn11946	0.098018
COMMON	fig|83332.1.peg.89	rxn03395	fig|83332.1.peg.89rxn03395	0.098018		COMMON	fig|83332.1.peg.89	rxn03395	fig|83332.1.peg.89rxn03395	0.098018
COMMON	fig|83332.1.peg.2639	rxn03167	fig|83332.1.peg.2639rxn03167	0.00198616		COMMON	fig|83332.1.peg.2639	rxn03167	fig|83332.1.peg.2639rxn03167	0.00198616
COMMON	fig|83332.1.peg.3199	rxn03394	fig|83332.1.peg.3199rxn03394	0.957066		COMMON	fig|83332.1.peg.3199	rxn03394	fig|83332.1.peg.3199rxn03394	0.957066
COMMON	fig|83332.1.peg.3810	rxn09106	fig|83332.1.peg.3810rxn09106	0.639278		COMMON	fig|83332.1.peg.3810	rxn09106	fig|83332.1.peg.3810rxn09106	0.639278
COMMON	fig|83332.1.peg.3810	rxn10265	fig|83332.1.peg.3810rxn10265	0.639278		COMMON	fig|83332.1.peg.3810	rxn10265	fig|83332.1.peg.3810rxn10265	0.639278
COMMON	fig|83332.1.peg.3810	rxn10266	fig|83332.1.peg.3810rxn10266	0.639278		COMMON	fig|83332.1.peg.3810	rxn10266	fig|83332.1.peg.3810rxn10266	0.639278
[truncated: 223 more rows]

## Sheet: Phenosims
Model	Likelihoods	Iterative	Gene	Media	Result	WASGAPFILLED				Phenotypes for gapfill-specific genes
[truncated: 27,547 more rows]

[truncated: 1 more sheets: GR_pair_likelihoods]
